# Supplementary material for: Characterizing the Genetic Landscape of Major Depression through Multiple-trait and Cross-ancestry GWAS Meta-Analysis of 1,396,021 Individuals
Source: Research Square preprint supplement (doi:10.21203/rs.3.rs-6316036/v1), 2025-04-11
Supplement: Supplementary file 2 [file a69596ef03c0b895d0f2319d.xlsx]

## Sheet: Description
Supplementary Table	Description
S1	Detailed information on the META analysis of GWAS for the same phenotypes, including effective sample sizes, lambda, LDSC intercept, and heritability.
S2	Sources, genome references, and sample sizes of all GWAS summary data included in this study.
S3	Calculation of lambda meta for the same phenotypes from different data sources.
S4	Genetic correlation analysis of MD in European and East Asian ancestries with neuropsychiatric diseases for each ancestry.
S5	Identification of 217 independent genome-wide significant SNPs mapped to 110 loci using FUMA, with loci spaced at least 500 kb apart.
S6	Creation of 500KB windows around the key independent risk loci in the risk genomic regions identified by FUMA, followed by multi-ancestry fine mapping using MESuSiE.
S7	eQTL gene annotation using available brain tissue datasets in FUMA.
S8	Gene-based association analysis using mBAT-combo, with an inclusion criterion of FDR<0.05.
S9	Genes with POPS scores in the top 10% of the distribution.
S10	TWAS analysis using SNP weights from all available brain tissues, adrenal glands, pituitary, thyroid, lung, and whole blood from GTEx v8, as well as dorsolateral prefrontal cortex from CMC, with an inclusion criterion of FDR<0.05.
S11	SMR analysis using brain tissues from BrainMeta, blood from eQTLGen consortium, all available brain tissues, adrenal glands, pituitary, thyroid, and lung from GTEx, and 9 brain cell types from two studies, with an inclusion criterion of FDR<0.05 and P.HEIDI>0.01.
S12	Phenotype enrichment analysis based on MGI Mammalian Phenotype for reliable genes identified by four or more methods.
S13	Identification of drugs that can reverse disease characteristics using TWAS Z-scores as proxies for MD traits and the CMap touchstone dataset, with an inclusion criterion of τ<-75.
S14	pQTL analysis through BLISS and meta-analysis of positive results across different ancestries, with an inclusion criterion of Bonferroni-corrected P<0.05.
S15	Construction of PGS models using 13 different single-trait or cross-ancestry methods, with MD data from UKB used as the test set.

## Sheet: S1
S1.Detailed information on the META analysis of GWAS for the same phenotypes, including effective sample sizes, lambda, LDSC intercept, and heritability.
Trait	N.case	N.control	Neff	lambda	LDSC Intercept	Heritability	P.Heritability
Alzheimer's disease-EUR	121846	1079324	437944	1.05132	1.0481 (0.0099)	0.0131 (0.0027)	1.22314e-06
Autism spectrum disorder-EUR	36617	64710	93538.2	1.30897	1.1783 (0.0101)	0.1802 (0.0095)	1e-300
Bipolar disorder-EUR	49486	730839	185391	1.09806	1.0236 (0.0077)	0.0885 (0.0048)	1e-300
Epilepsy-EUR	16482	640966	64275.2	1.00983	1.0158 (0.0085)	0.0603 (0.0102)	3.38462e-09
Intracerebral hemorrhage-EUR	4711	827410	18737.3	1.03114	1.0199 (0.007)	0.0588 (0.0271)	0.0300264
MA	439605	1693431	1.39602e+06	1.10909	0.8627 (0.0096)	0.026 (0.0008)	1e-300
Major depression-EUR	417625	1332475	1.27187e+06	1.10859	0.8537 (0.0097)	0.0283 (0.0009)	1e-300
MAMT	439605	1693431	1.39602e+06	1.195	1.0143 (0.0108)	0.0292 (0.001)	1e-300
Panic disorder-EUR	7616	376046	29859.3	1.04024	1.0193 (0.0072)	0.053 (0.0178)	0.00290583
Parkinson's disease-EAS	1390	180788	5517.58	0.975035	1.0085 (0.0075)	0.0166 (0.082)	0.839574
Parkinson's disease-EUR	38355	856556	146845	0.953676	1.0014 (0.0062)	0.0134 (0.0032)	2.82044e-05
Schizophrenia-EUR	71696	512565	251592	1.05278	1.0668 (0.0086)	0.0595 (0.0034)	1e-300
Stroke-EUR	68082	777834	250410	1.03688	1.014 (0.0071)	0.0049 (0.0021)	0.0196307
Subarachnoid hemorrhage-EUR	3532	371753	375285	1.05425	1.0247 (0.0078)	0.0073 (0.0015)	1.13496e-06

## Sheet: S2
S2.Sources, genome references, and sample sizes of all GWAS summary data included in this study.
Racist	Trait	Genome Reference	PMID	N.Case	N.Control	N.Samplesize
EUR	Stroke	GRCh37	29531354	40585	406111	446696
	Stroke	GRCh38	FinnGen	27497	371723	399220
	Epilepsy	GRCh38	34662886	3591	328163	331754
	Epilepsy	GRCh38	FinnGen	12891	312803	325694
	Intracerebral hemorrhage	GRCh37	34737426	655	455693	456348
	Intracerebral hemorrhage	GRCh38	FinnGen	4056	371717	375773
	Parkinson's disease	GRCh38	FinnGen	4681	407500	412181
	Parkinson's disease	GRCh37	IPDGC	33674	449056	482730
	Subarachnoid hemorrhage	GRCh38	FinnGen	3532	371753	375285
	Alzheimer's disease	GRCh38	35379992	111326	677663	788989
	Alzheimer's disease	GRCh38	FinnGen	10520	401661	412181
	schizophrenia	GRCh38	FinnGen	6708	398386	405094
	schizophrenia	GRCh37	37689771	11602	36921	48523
	schizophrenia	GRCh37	35396580	53386	77258	130644
	Autism spectrum disorder	GRCh37	30804558	18382	27969	46351
	Autism spectrum disorder	GRCh37	37689771	18235	36741	54976
	Bipolar disorder	GRCh37	34002096	41917	371549	413466
	Bipolar disorder	GRCh38	FinnGen	7569	359290	366859
	panic disorder	GRCh38	FinnGen	5368	368054	373422
	panic disorder	GRCh37	31712720	2248	7992	10240
	Major depression	GRCh38	FinnGen	47696	359290	406986
	Major depression	GRCh37	37464041	294322	741438	1035760
	Major depression	GRCh37	37985818	75607	231747	307354
EAS	Stroke	GRCh37	36180795	27413	237242	264655
	Epilepsy	GRCh37	34594039	2466	175788	178254
	Intracerebral hemorrhage	GRCh37	34594039	1456	152022	153478
	Parkinson's disease	GRCh37	34594039	340	175788	176128
	Parkinson's disease	GRCh37	37805635	1050	5000	6050
	Subarachnoid hemorrhage	GRCh37	34594039	1203	152022	153225
	Alzheimer's disease	GRCh37	33654092	3962	4074	8036
	schizophrenia	GRCh37	31740837	22778	35362	58140
	Major depression	GRCh37	38177345	21980	360956	382936

## Sheet: S3
S3.Calculation of lambda meta for the same phenotypes from different data sources.
Trait	lambda meta
Stroke	1.0752
Epilepsy	0.706454
Intracerebral hemorrhage	1.00337
Parkinson's disease-EUR	0.929425
Alzheimer's disease	1.12818
SC PGC-FinnGen	1.05323
SC PGC-iPSYCH	1.27293
SC FinnGen-iPSYCH	1.0711
Autism spectrum disorder	1.11515
Bipolar disorder	1.2475
panic disorder	1.03334
MD Finngen-iPSYCH	1.29654
MD Finngen-23andMe	1.18297
MD iPSYCH-23andMe	1.27251
Parkinson's disease-EAS	1.02226

## Sheet: S4
S4.Genetic correlation analysis of MD in European and East Asian ancestries with neuropsychiatric diseases for each ancestry.
Group	EUR					EAS
	corr corrected	rho corrected	se rho	pvalue corrected	FDR	corr corrected	rho corrected	se rho	pvalue corrected	FDR
Alzheimers disease-MD	-0.0206075	-0.000308332	0.000408941	0.450863	0.451	0.178615	0.00621101	0.00424642	0.143565	0.2016
ASD-MD	0.326123	0.0150071	0.0011646	5.39654e-38	5.4e-37	NA	NA	NA	NA	NA
BD-MD	0.734802	0.0204513	0.00276741	1.46772e-13	3.675e-13	NA	NA	NA	NA	NA
Epilepsy-MD	-0.143384	-0.00322375	0.000986909	0.0010888	0.00218	-0.220969	-0.000746192	0.00103447	0.470707	0.5495
Intracerebral hemorrhage-MD	-0.115677	-0.00375818	0.00173205	0.0300228	0.0428571	0.5501	4.76967e-05	0.000105232	0.650367	0.65
panic disorder-MD	-0.597119	-0.0165232	0.00203469	4.63342e-16	1.54333e-15	NA	NA	NA	NA	NA
Parkinson disease-MD	-0.0731147	-0.000802169	0.000553544	0.147296	0.163333	0.368284	-0.0113798	0.00518475	0.028174	0.04935
SAH-MD	0.187132	0.00179225	0.000558355	0.00132797	0.00221667	0.443982	0.000271668	9.30015e-05	0.00348779	0.00814333
SC-MD	0.970374	0.0245674	0.00290142	2.50977e-17	1.255e-16	0.506835	0.010845	0.00182882	3.02831e-09	2.121e-08
Stroke-MD	0.0920393	0.000718944	0.000478942	0.133328	0.163333	0.272093	-0.00028172	6.80256e-05	3.45222e-05	0.00012075

## Sheet: S5
S5.Identification of 217 independent genome-wide significant SNPs mapped to 110 loci using FUMA, with loci spaced at least 500 kb apart.
rsID	GenomicLocus	chr	pos	MAMT.P	A2	A1	nearestGene	Func	Novel
rs301806	1	1	8482078	2.094e-09	C	T	RERE	intronic	0
rs2102341	2	1	37193908	4.258e-13	T	C	RP4-614N24.1	intergenic	0
rs7534271	3	1	47693981	4.673e-08	C	G	TAL1:RP1-18D14.7	ncRNA_exonic	0
rs11579246	4	1	50559162	1.013e-08	A	G	ELAVL4	intronic	1
rs12135327	5	1	52297961	2.647e-11	C	T	NRD1	intronic	0
rs11209952	6	1	72837500	7.984e-23	C	T	RPL31P12	intergenic	0
rs11210077	6	1	73333163	3.095e-12	A	G	RP4-660H19.1	ncRNA_intronic	0
rs12128707	6	1	72588119	1.68e-09	A	G	NEGR1	intronic	0
rs12410714	6	1	74099273	3.183e-08	G	A	RP4-788P17.1	intergenic	0
rs2126077	6	1	72712607	2.762e-13	A	T	NEGR1	intronic	0
rs2821235	6	1	72599170	4.226e-10	T	C	NEGR1	intronic	0
rs2821266	6	1	72535285	6.648e-10	T	C	NEGR1	intronic	0
rs4571923	6	1	73736562	9.943e-17	G	A	RP4-598G3.1	intergenic	0
rs61765651	6	1	72754314	2.297e-14	C	T	NEGR1	intergenic	0
rs7415357	6	1	73232039	6.526e-11	G	C	RP4-660H19.1:RP11-262K1.1	ncRNA_intronic	0
rs61453857	7	1	80893110	7.958e-09	T	C	HNRNPA1P64	intergenic	1
rs67904215	7	1	80809518	5.492e-11	G	A	AL606519.1	intergenic	0
rs12145763	8	1	90798884	4.518e-08	C	T	RNU6-695P	intergenic	0
rs16846478	9	1	173832647	7.316e-10	A	T	GAS5-AS1	ncRNA_exonic	0
rs10913112	10	1	175913828	2.639e-09	C	T	RFWD2	downstream	0
rs12741940	10	1	175908200	2.681e-08	C	A	RFWD2	intergenic	0
rs16851203	11	1	177370033	3.05e-13	T	C	RP1-35C21.2	ncRNA_intronic	0
rs56172555	11	1	177299241	7.145e-11	C	T	RP1-35C21.1	intergenic	0
rs2201956	12	1	197812879	6.642e-12	C	G	C1orf53	intergenic	0
rs2477077	12	1	197671115	3.365e-15	C	T	DENND1B	intronic	0
rs35207123	12	1	197827444	3.352e-12	A	C	C1orf53	intergenic	0
rs7534863	12	1	197398086	1.605e-11	A	G	CRB1	intronic	0
rs10863277	13	1	217091780	3.601e-08	T	C	ESRRG	intronic	0
rs2377013	14	1	226600665	7.776e-09	C	A	RP11-118H4.3	upstream	0
rs10182358	15	2	22492802	2.635e-08	G	A	AC068490.2	ncRNA_intronic	0
rs12619197	15	2	22566548	1.785e-09	G	A	AC068490.2	ncRNA_intronic	0
rs13030499	15	2	22729432	7.43e-09	G	A	AC068490.2	ncRNA_intronic	0
rs7559277	16	2	52321247	2.39e-08	C	T	AC007682.1	ncRNA_intronic	0
rs11682175	17	2	57987593	4.329e-11	T	C	CTD-2026C7.1	ncRNA_intronic	0
rs1837713	18	2	104461000	5.48e-10	A	G	AC013727.1	intergenic	1
rs2678670	18	2	104469564	2.462e-10	A	T	AC013727.1	intergenic	1
rs6713237	19	2	142489456	1.887e-08	T	C	LRP1B	intronic	1
rs6715304	20	2	175220520	5.792e-10	T	C	CIR1	intronic	0
rs6732156	21	2	208044947	1.443e-10	C	T	AC007879.1	ncRNA_intronic	1
rs283468	22	2	233658309	1.947e-08	C	T	GIGYF2	intronic	1
rs114990157	23	3	43268545	3.164e-11	G	A	AC104434.1	intergenic	0
rs13058913	23	3	44732013	3.468e-09	A	T	RP11-944L7.4	intergenic	0
rs185446477	23	3	43824621	2.033e-08	C	T	RP4-672N11.1	intergenic	0
rs199839695	23	3	43437572	9.46e-10	T	A	SNRK:ANO10	intronic	0
rs530758485	23	3	43697744	5.638e-13	G	A	ANO10	intronic	0
rs138653738	24	3	49194532	2.631e-09	A	T	RP11-694I15.7	ncRNA_intronic	0
rs62262722	24	3	49769419	8.379e-09	G	C	IP6K1	intronic	0
rs7617480	24	3	49210732	1.071e-12	A	C	KLHDC8B	intronic	0
rs1656374	25	3	158283060	3.701e-08	C	T	RP11-538P18.2	ncRNA_intronic	0
rs9856753	25	3	158045141	6.346e-10	G	T	RSRC1	intronic	0
rs2132342	26	4	59873841	5.709e-09	G	A	RP11-340A13.2	ncRNA_intronic	0
rs1484145	27	4	80217741	5.003e-09	T	C	LINC01088:NAA11	ncRNA_intronic	0
rs1975488	28	4	90984432	3.283e-11	C	T	CCSER1	intergenic	1
rs45510091	29	4	123186393	4.003e-10	A	G	KIAA1109	intronic	1
rs35553410	30	4	131237381	1.091e-08	T	C	RP11-521E5.1	intergenic	1
rs12517438	31	5	30842054	7.111e-09	T	G	RPL19P11	intergenic	0
rs10471540	32	5	61499198	2.29e-09	G	A	RN7SKP157	intergenic	0
rs11740836	33	5	87652128	6.682e-14	T	C	TMEM161B-AS1	ncRNA_intronic	0
rs12188167	33	5	87666305	7.33e-11	C	G	TMEM161B-AS1	ncRNA_intronic	0
rs194225	33	5	88001186	1.082e-11	A	G	CTC-467M3.1	ncRNA_intronic	0
rs3099439	33	5	87545318	2.875e-14	C	T	TMEM161B	intronic	0
rs324901	33	5	87920406	6.07e-12	C	T	LINC00461	ncRNA_intronic	0
rs4916661	33	5	87932809	3.8e-09	G	T	LINC00461	ncRNA_intronic	0
rs6882046	33	5	87968864	8.384e-11	A	G	LINC00461	ncRNA_exonic	0
rs10061069	34	5	93071630	2.076e-10	G	C	FAM172A:POU5F2	intronic	0
rs17083315	34	5	93050168	3.968e-09	A	C	FAM172A	intronic	0
rs10053371	35	5	103914786	1.228e-09	A	T	RP11-6N13.1	ncRNA_intronic	0
rs30266	35	5	103972357	2.383e-10	G	A	RP11-6N13.1	ncRNA_intronic	0
rs7379967	36	5	120168581	2.917e-08	G	A	CTD-2334D19.1	intergenic	1
rs62379856	36	5	120122231	8.079e-10	T	A	CTD-2334D19.1	ncRNA_intronic	0
rs3756334	37	5	140213796	3.335e-08	G	A	PCDHA1:PCDHA2:PCDHA3:PCDHA4:PCDHA5:PCDHA6	intronic	0
rs358652	38	5	143888822	1.117e-08	A	C	CTB-85P21.1	intergenic	1
rs73332251	39	5	163054781	4.648e-08	T	G	RP11-756G12.1	intergenic	1
rs11135349	40	5	164523472	2.3e-12	A	C	CTC-340A15.2	ncRNA_intronic	1
rs141862082	41	5	169677272	1.444e-08	C	T	C5orf58:LCP2	intronic	1
rs35948205	42	6	17018848	2.563e-08	C	G	STMND1	intergenic	0
rs7753493	43	6	66963871	1.976e-08	A	G	AC002485.1	intergenic	1
rs9360163	43	6	66574054	7.548e-09	C	T	ADH5P4	intergenic	0
rs11755902	44	6	76244728	1.984e-08	C	G	RPL26P20	intergenic	1
rs12374612	45	6	100955752	3.318e-10	C	T	ASCC3	downstream	0
rs7740902	45	6	101464076	1.711e-10	G	A	snoU13	intergenic	0
rs4515420	46	6	105365426	3.339e-11	A	T	LINC00577	intergenic	0
rs1581046	47	6	142986997	7.187e-10	A	C	RP11-440G9.1	intergenic	0
rs2982695	48	6	152285778	9.304e-10	T	C	ESR1	intronic	0
rs9765981	48	6	152253094	9.826e-09	C	T	ESR1	intronic	0
rs10267593	49	7	1937261	8.06e-13	G	A	MAD1L1	intronic	0
rs1637759	49	7	2220053	1.448e-09	C	T	MAD1L1	intronic	0
rs3823624	49	7	2110346	2.186e-15	T	C	MAD1L1	intronic	0
rs6973700	49	7	1856669	4.559e-11	A	G	MAD1L1	intronic	0
rs6976684	49	7	1848795	5.976e-10	G	A	MAD1L1	intergenic	0
rs1990622	50	7	12283787	4.231e-12	A	G	TMEM106B	downstream	0
rs12705593	51	7	109100168	3.158e-10	G	T	AC073071.1	intergenic	0
rs55704657	51	7	109159444	1.228e-08	G	A	AC073071.1	intergenic	0
rs8180817	52	7	114047542	9.76e-10	G	C	FOXP2	intronic	0
rs10233018	53	7	117523709	3.442e-11	A	G	AC007568.1	ncRNA_exonic	0
rs61702433	53	7	117627585	5.889e-09	G	T	AC003084.2	intergenic	0
rs2551767	54	7	135139011	4.62e-09	C	T	CNOT4	intronic	0
rs751996	55	7	158522685	4.06e-08	G	C	ESYT2	intergenic	1
rs17708090	56	8	10184591	7.491e-09	C	T	MSRA	intronic	0
rs2009619	56	8	10143943	1.949e-08	G	A	MSRA	intronic	0
rs7017108	57	8	20772332	1.401e-08	C	T	TMEM97P2	intergenic	0
rs12546915	58	8	31973244	6.333e-09	C	T	NRG1:NRG1-IT1	ncRNA_intronic	1
rs2085998	58	8	31875238	2.681e-08	C	T	NRG1	intronic	1
rs7035623	59	9	2990693	7.477e-09	G	A	CARM1P1	ncRNA_intronic	0
rs10809464	60	9	11408193	3.389e-08	T	A	RP11-23D5.1	intergenic	0
rs10809504	60	9	11514847	1.868e-13	G	A	RP11-23D5.1	intergenic	0
rs1348384	60	9	11560184	8.433e-13	C	T	RP11-23D5.1	intergenic	0
rs1931388	60	9	11203149	8.561e-14	A	G	RP11-23D5.1	intergenic	0
rs56021312	60	9	11123022	1.858e-08	T	G	RP11-109M17.1	intergenic	0
rs56072039	60	9	11423966	3.946e-15	T	C	RP11-23D5.1	intergenic	0
rs72696269	60	9	11268698	1.412e-09	T	C	RP11-23D5.1	intergenic	0
rs13296641	61	9	31160243	5.69e-09	G	A	RP11-572H4.1	intergenic	0
rs1329571	62	9	37027536	3.57e-09	A	T	PAX5	intronic	0
rs1329572	62	9	37001471	4.739e-10	T	A	PAX5	intronic	0
rs60703636	62	9	37206109	6.999e-09	G	T	ZCCHC7	intronic	0
rs7867479	62	9	36994885	3.76e-10	A	G	PAX5	intronic	0
rs10761240	63	9	96361922	4.539e-08	G	A	PHF2	intronic	1
rs6479487	63	9	96237373	1.574e-08	T	G	FAM120A	intronic	1
rs1888286	64	9	119726051	7.783e-10	T	C	ASTN2	intronic	0
rs1360693	65	9	122667930	3.563e-08	A	G	RP11-360A18.2	intergenic	1
rs7044210	66	9	126537668	1.447e-09	A	C	DENND1A	intronic	0
rs7898650	67	10	63263192	1.802e-08	C	T	RP11-809M12.1	intergenic	1
rs4746270	68	10	76944947	1.809e-08	G	A	AL392111.1	downstream	1
rs10786831	69	10	106614571	1.139e-11	A	G	SORCS3	intronic	1
rs1565418	69	10	106571608	4.254e-12	C	T	SORCS3	intronic	1
rs2451466	69	10	106543672	1.904e-10	G	A	SORCS3	intronic	1
rs2451468	69	10	106613558	1.199e-08	T	C	SORCS3	intronic	1
rs2491373	69	10	106637748	2.086e-14	T	C	SORCS3	intronic	1
rs6584635	69	10	106675585	1.339e-14	C	T	SORCS3	intronic	1
rs7937911	70	11	6735869	2.512e-08	A	G	GVINP1	ncRNA_exonic	1
rs7941641	71	11	28668656	2.846e-08	G	T	RP11-960D24.1	intergenic	0
rs4067985	72	11	30948980	1.124e-09	A	G	DCDC1	intronic	0
rs60171845	73	11	31835468	2.437e-10	A	C	PAX6:RCN1	intronic	0
rs115682303	74	11	32814589	2.664e-08	T	C	CCDC73	intronic	0
rs80067584	74	11	32597748	8.14e-09	C	A	EIF3M	intergenic	0
rs198457	75	11	61471678	1.87e-08	C	T	DAGLA	intronic	0
rs7117514	76	11	70544937	1.198e-08	A	G	SHANK2	intronic	0
rs10160510	77	11	88614324	4.691e-11	A	T	GRM5	intronic	0
rs10830219	77	11	88872509	2.201e-10	A	T	AP001482.1	intergenic	0
rs11018544	77	11	88970006	1.314e-10	A	T	TYR	intronic	0
rs4753209	77	11	88743208	7.338e-15	T	A	GRM5	intronic	0
rs6483414	77	11	88477214	3.094e-10	T	C	GRM5	intronic	0
rs648702	77	11	88657026	6.604e-11	A	G	GRM5	intronic	0
rs597187	78	11	99516636	1.622e-08	C	T	CNTN5	intronic	0
rs10891564	79	11	113374013	3.987e-11	G	A	DRD2	intergenic	0
rs11214601	79	11	113272762	1.31e-09	C	T	ANKK1	intergenic	0
rs1554929	79	11	113278764	1.142e-09	C	T	RP11-159N11.3	ncRNA_intronic	0
rs17613838	79	11	113638177	1.392e-08	T	C	ZW10	intronic	0
rs4938023	79	11	113374847	2.588e-16	T	G	DRD2	intergenic	0
rs7964539	80	12	84497318	7.603e-09	C	T	SNORA3	intergenic	0
rs35905305	81	12	121328082	9.281e-10	T	G	SPPL3	intronic	0
rs1326306	82	13	31938186	1.655e-12	A	C	B3GALTL	intergenic	1
rs9530139	82	13	31847324	6.386e-11	C	T	B3GALTL	intronic	1
rs9543859	82	13	31869226	9.748e-09	C	T	B3GALTL	intronic	1
rs10507396	82	13	31713542	1.784e-10	A	T	HSPH1	intronic	0
rs4617711	82	13	31809940	1.918e-08	T	C	B3GALTL	intronic	0
rs7320000	82	13	31749719	5.624e-10	G	T	HSPH1	intergenic	0
rs9536381	83	13	53860655	1.606e-12	C	T	RN7SL618P	intergenic	1
rs1343605	83	13	53647048	6.464e-14	A	C	OLFM4	intergenic	0
rs2759715	83	13	53761071	3.785e-11	G	A	PCDH8P1	intergenic	0
rs9540729	84	13	66947124	1.933e-09	A	T	PCDH9	intronic	0
rs9545393	85	13	80873944	3.103e-08	A	G	SPRY2	intergenic	0
rs9601755	86	13	82468893	4.082e-08	C	A	PTMAP5	intergenic	1
rs11616450	87	13	97166013	4.651e-09	A	G	HS6ST3	intronic	1
rs141394175	87	13	95904563	9.216e-09	T	A	ABCC4	intronic	1
rs3897950	87	13	97116614	2.991e-08	G	A	HS6ST3	intronic	1
rs7335011	87	13	97105579	3.568e-08	C	A	HS6ST3	intronic	1
rs4772087	88	13	99115041	1.639e-08	C	T	STK24	intronic	0
rs10132715	89	14	42182103	2.975e-10	A	G	LRFN5	intronic	0
rs1900599	89	14	42141201	1.331e-11	G	A	LRFN5	intronic	0
rs56321769	89	14	42078975	1.409e-08	G	C	LRFN5	intronic	0
rs61990289	89	14	42076434	1.082e-13	C	T	LRFN5	upstream	0
rs2274794	90	14	57283934	1.326e-09	C	T	OTX2-AS1	ncRNA_intronic	0
rs7229	91	14	64692825	2.59e-10	G	A	SYNE2:ESR2	UTR3	0
rs548831163	92	14	71198242	1.057e-09	G	A	MAP3K9	intronic	1
rs11159104	93	14	75293374	1.53e-12	A	G	YLPM1	intronic	0
rs2403193	94	14	104009939	1.851e-11	C	T	TRMT61A	intergenic	0
rs2381998	95	15	37713714	4.52e-09	T	C	RP11-720L8.1	ncRNA_intronic	0
rs8037355	95	15	37643831	1.918e-10	C	T	RP11-720L8.1	intergenic	0
rs56059718	96	15	38836777	4.142e-08	C	A	RASGRP1	intronic	0
rs4781375	97	16	13092220	1.163e-08	C	T	SHISA9	intronic	0
rs12926421	98	16	13785959	4.326e-09	G	A	U95743.1	intergenic	0
rs12917983	99	16	71835243	1.301e-08	A	C	AP1G1	intronic	0
rs139350162	99	16	72557333	5.219e-10	G	A	AC004158.2	ncRNA_intronic	0
rs151071492	99	16	72217050	8.64e-10	A	G	PMFBP1	intergenic	0
rs184474340	99	16	71825756	1.143e-09	C	T	AP1G1	intronic	0
rs2070939	99	16	72108474	3.518e-09	G	A	TXNL4B:HPR	intronic	0
rs57852066	99	16	73029579	3.253e-09	G	A	ZFHX3	intronic	0
rs75070471	99	16	72938804	2.238e-08	C	T	ZFHX3	intronic	0
rs77701645	99	16	72878990	9.059e-09	G	C	ZFHX3	intronic	0
rs111574702	100	17	42747184	3.179e-09	C	T	C17orf104	UTR3	0
rs147621919	100	17	42725983	8.593e-09	T	G	RP11-1072C15.2	ncRNA_intronic	0
rs11081827	101	18	31390228	2.554e-09	C	A	NOL4	intergenic	0
rs11665070	102	18	35152563	1.593e-16	G	A	CELF4	intergenic	1
rs35064785	102	18	35197862	1.343e-10	G	A	MIR4318	intergenic	1
rs62081464	102	18	35142133	7.506e-14	C	T	CELF4	intronic	1
rs11663393	103	18	50614732	1.147e-10	G	A	DCC	intronic	1
rs8091083	103	18	50870391	2.387e-09	T	A	DCC	intronic	1
rs8092490	103	18	50754631	1.088e-12	T	A	DCC	intronic	1
rs1261070	104	18	52903085	2.109e-08	A	G	TCF4	intronic	0
rs12967143	104	18	53099012	1.362e-15	G	C	TCF4	intronic	0
rs12969473	104	18	53443931	4.122e-09	T	G	RP11-397A16.1	ncRNA_intronic	0
rs1348047	104	18	53050058	3.716e-13	G	T	TCF4	intronic	0
rs139088385	104	18	52732938	3.214e-09	C	T	CTD-2171N6.1	intergenic	0
rs1452787	104	18	53207207	1.454e-12	A	G	TCF4	intronic	0
rs1833303	104	18	52424769	2.361e-08	C	G	RAB27B	intronic	0
rs1942262	104	18	52873317	1.539e-08	G	A	TCF4	intergenic	0
rs2924329	104	18	53135894	1.617e-15	G	A	TCF4:RP11-619L19.1	ncRNA_intronic	0
rs35349559	104	18	52765753	8.485e-10	G	A	CTD-2171N6.1	intergenic	0
rs9964176	104	18	52751578	6.743e-12	G	T	CTD-2171N6.1	intergenic	0
rs11664298	105	18	77578986	6.051e-09	G	A	RP11-154H12.3	intergenic	1
rs118155392	106	19	49961483	3.66e-08	A	G	ALDH16A1	intronic	0
rs9074	107	20	44688665	4.852e-08	G	A	SLC12A5	UTR3	0
rs6012575	108	20	47598497	3.027e-10	G	C	ARFGEF2	intronic	0
rs13054099	109	22	41215672	8.159e-10	T	C	SLC25A17	upstream	0
rs5751069	109	22	41627775	1.341e-09	C	G	CHADL	intronic	0
rs7285579	110	22	46441980	3.577e-09	C	T	LINC00899	intergenic	0

## Sheet: S6
S6.Creation of 500KB windows around the key independent risk loci in the risk genomic regions identified by FUMA, followed by multi-ancestry fine mapping using MESuSiE.
GenomicLocus	SNP	EUR	EAS	EUR_EAS
1	rs12402539	0.992339	0	0.263595
1	rs12401496	0.992339	0	0.31082
2	rs2135595	0.994543	0	0.00567264
2	rs6701891	0.994358	0	0.286338
2	rs541301	0.730164	0	0.269829
2	rs495596	0.707149	0	0.31406
2	rs2993076	0.743716	0	0.256284
4	rs138536374	0.569661	0	0.553103
4	rs35596618	0.99534	0	0.00467099
5	rs12135327	0.682389	0.000882592	0.317511
6	rs7528312	0.995029	0	0.00497076
7	rs12080622	0.816391	0	0.00381604
7	rs115567255	0.994388	0	0.00561217
8	rs10922810	0.632947	0.00272759	0.212947
8	rs6688225	0.745147	0.00272759	0.25487
8	rs12145763	0.0816851	0.00272759	0.918012
9	rs116381022	0.994255	0	0.00574522
9	rs189500176	0.993587	0	0.00641281
9	rs4652265	0.989001	0	0.0110019
9	rs12074276	0.754595	0	0.00645136
9	rs1653627	0.994242	0	0.592649
9	rs11582205	0.994058	0	0.00595997
10	rs115066674	0.748667	0	0.251336
10	rs111486085	0.995186	0	0.00482457
10	rs2938149	0.733758	0	0.003068
12	rs200719458	0.994111	0	0.00588932
12	rs12131588	0.993801	0	0.00619945
15	rs12373752	0.99376	0	0.00624022
15	rs202057999	0.99383	0	0.00617008
16	rs139497750	0.995216	0	0.00478431
16	rs13397279	0.99367	0	0.00635006
17	rs1051061	0.417898	0	0.582102
17	rs13011711	0.995756	0	0.00424443
17	rs113508144	0.995718	0	0.252759
17	rs3771213	0.995844	0	0.00415821
17	rs11678320	0.739181	0	0.260819
19	rs6713237	0.729145	0.0612158	0.243273
20	rs13009735	0.994828	8.06689e-10	0.252043
20	rs56060417	0.99397	8.24295e-10	0.00603197
22	rs11692545	0.724446	0	0.00329483
22	rs9679089	0.994906	0	0.00509425
22	rs75433761	0.743507	0	0.256744
22	rs921054	0.750058	0	0.250071
23	rs55887024	0.987993	0	0.0120077
23	rs62242563	0.988211	0	0.011791
24	rs34890793	0.724633	0	0.275367
24	rs7646288	0.749996	0	0.250004
24	rs35249408	0.66227	0	0.337803
25	rs79213222	0.994674	0	0.00532606
25	rs865454	0.993706	0	0.00624462
25	rs79787173	0.990319	0	0.00968124
25	rs827188	0.991023	0	0.00510726
26	rs13115923	0.583217	3.11622e-181	0.416783
26	rs28571098	0.986889	3.09267e-181	0.0131115
26	rs79442011	0.747167	3.12105e-181	0.252763
26	rs78040411	0.989952	3.09638e-181	0.0100488
27	rs6822761	0.689579	1.94335e-39	0.310421
27	rs17003697	0.990885	2.83959e-39	0.00911474
27	rs35840311	0.994788	5.13919e-39	0.255827
27	rs727312	0.993125	1.29397e-39	0.006988
28	rs6857224	0.750061	3.86093e-146	1
28	rs2120371	0.534202	3.8237e-146	0.715392
28	rs6856201	0.74376	3.82734e-146	0.256123
28	rs7674520	0.749995	3.80736e-146	0.250005
28	rs75443473	0.718982	3.86798e-146	0.391796
31	rs12517438	0.677004	0.00271248	0.305724
32	rs3900510	0.995435	0	0.00456495
32	rs111397471	0.995057	0	0.0049427
33	rs13172095	0.995358	0	0.0056398
33	rs12656740	0.994859	0	0.767479
34	rs72788365	0.749163	0.00128143	0.250837
35	rs10479296	0.641934	0	0.228721
35	rs1363105	0.750091	0	0.336663
36	rs17429630	0.36467	0	0.63533
36	rs200437493	0.990167	0	0.0098331
36	rs62379848	0.994136	0	0.00586395
36	rs4317354	0.992736	0	0.0060726
38	rs2305555	0.689797	0	0.00328354
38	rs358652	0.99459	0	0.00541036
39	rs115841258	0.683608	0.0329612	0.315787
40	rs10476489	0.991862	0	0.00817889
40	rs56373135	0.991529	0	0.00847133
40	rs7717252	0.986135	0	0.00802529
44	rs2313589	0.731095	0.00102041	0.268624
44	rs148783843	0.730679	0.00102041	0.269321
45	rs9322271	0.994127	0	0.00587355
45	rs116526614	0.992692	0	0.00730763
46	rs35662710	0.749998	0	0.250004
46	rs6904432	0.718847	0	0.285108
47	rs9496426	0	0	1
47	rs9496428	0	0	1
47	rs4512243	0.995024	0	0.00497638
47	rs7740440	0.995107	0	0.00489277
48	rs9478252	0.995472	0	0.00452844
48	rs6912184	0.995924	0	0.00407568
49	rs58169303	0.733585	4.2342e-157	0.266415
49	rs73046334	0.742732	4.23353e-157	0.257268
49	rs62435132	0.738297	4.23385e-157	0.261703
49	rs56256289	0.733876	4.2342e-157	0.266124
49	rs62435134	0.738671	4.23433e-157	0.262265
49	rs34040190	0.731249	4.23299e-157	0.24489
50	rs10950398	0.99483	0	0.356713
50	rs28549831	0.993786	0	0.00522189
50	rs5011438	0.995124	0	0.249991
53	rs7801876	0.992934	0	0.00706568
53	rs79996840	0.992889	0	0.00711133
55	rs28406450	0.633376	0.00104601	0.210146
57	rs2616153	0.677481	0	0.322467
57	rs2616158	0.722785	0	0.277215
57	rs2616161	0.991384	0	0.250098
57	rs2616165	0.549782	0	0.450218
57	rs7827868	0.617417	0	0.362581
57	rs13274829	0.748606	0	0.251394
57	rs17093306	0.740445	0	0.259555
58	rs11787429	0.746717	1.94807e-290	0.253283
58	rs60972506	0.748327	2.19918e-290	0.251673
58	rs1599677	0.742552	1.8579e-290	0.257447
58	rs899004	0.995145	1.848e-290	0.00485456
58	rs192505866	0.995085	1.8666e-290	0.00491465
58	rs10097567	0.99554	1.72529e-290	0.0044602
58	rs62498890	0.657028	2.24461e-290	0.342972
58	rs17614353	0.749999	2.15292e-290	0.249999
58	rs12546915	0.687407	2.67754e-290	0.312593
60	rs10959841	0.748858	4.36305e-124	0.251141
60	rs4740502	0.663598	3.87693e-124	0.336402
60	rs7046552	0.747856	3.83133e-124	0.252144
60	rs62555671	0.993976	3.90241e-124	0.311203
60	rs10960184	0.646133	3.78019e-124	0.160722
60	rs75337085	0.738564	3.70757e-124	0.261436
60	rs1486819	0.995093	3.70941e-124	0.00490745
61	rs13296641	0.990269	0	0.00997026
61	rs13297810	0.989178	0	0.261023
61	rs13297291	0.99534	0	0.00465978
61	rs7860503	0.993746	0	0.00625484
62	rs10973193	0.991911	0	0.00808864
62	rs10973194	0.99245	0	0.00755025
63	rs10761244	0.995193	0	0.267352
63	rs10821184	0.995207	0	0.00488336
66	rs1778896	0.985084	0	0.363832
66	rs670961	0.991531	0	0.00846943
66	rs7042633	0.989497	0	0.0105026
66	rs1230698	0.992737	0	0.00726343
66	rs4548283	0.985379	0	0.409247
69	rs11192168	0.989979	0	0.0100317
69	rs12770567	0.988337	0	0.0116762
69	rs7907507	0.728175	0	0.271825
69	rs7907162	0.731819	0	0.268181
71	rs7941641	0.994031	0	1
71	rs7928142	6.00809e-295	0	1
71	rs6484386	0.651284	0	0.601967
72	rs1028643	0.995477	0	0.00421026
72	rs273553	0.995742	0	0.253645
72	rs443287	0.992174	0	0.440513
72	rs273592	0.995828	0	0.00461314
77	rs10765190	0.994257	0	0.00574275
77	rs10765191	0.994584	0	0.00543005
78	rs1790267	0.995913	0	1
78	rs5006806	0.993498	0	1
78	rs648646	0.63338	0	0.00272569
78	rs597187	0	0	1
79	rs2514215	0.995043	1.11881e-24	0.250649
79	rs2511515	0.782723	1.11879e-24	0.189283
79	rs11214656	0.697929	1.11886e-24	0.302071
80	rs12824374	0.992476	0	0.00752372
80	rs36090708	0.992278	0	0.0077221
81	rs11065243	0.00187149	0.00187149	1
81	rs576664801	0.00187149	0.00187149	1
81	rs73415734	0.521199	0.00187149	0.237748
81	rs7967190	0.00187148	0.0018715	0.999679
81	rs2393794	0.0175534	0.00187149	0.982447
81	rs61953351	0.00187149	0.268479	0.695843
82	rs7334532	0.706588	0	0.295285
82	rs8002216	0.745502	0	0.255135
82	rs7989252	0.995693	0	0.00435647
82	rs2102562	0.720282	0	0.71384
84	rs116802299	6.13512e-14	7.2071e-71	1
84	rs9540731	2.29032e-16	1.25257e-71	0.803275
85	rs115129856	0.992745	0	0.00725773
85	rs1146940	0.522743	0	0.379126
88	rs4772087	0.582253	0.00234192	0.39991
89	rs35583725	0.978857	0	0.370504
89	rs1111037	0.981391	0	0.362116
90	rs2274794	0.585219	0.00874636	0.319406
91	rs12888491	0.75	2.37668e-152	0.255637
91	rs12886138	0.749986	2.3745e-152	0.35562
93	rs6574197	0.994788	0	0.00521226
93	rs7140660	0.995346	0	0.00466484
93	rs10083386	0.995599	0	0.00440108
93	rs2300598	0.730913	0	0.269087
93	rs2070598	0.995778	0	0.00422152
93	rs709888	0.992814	0	0.556485
93	rs13391	0.993689	0	0.00635071
94	rs7156436	0.712854	0	0.287254
94	rs4383078	0.638539	0	0.213528
95	rs111895502	0.750056	0	0.253718
95	rs620756	0.749758	0	0.250245
95	rs974567	0.735309	0	0.255178
95	rs1457257	0.750075	0	0.250008
95	rs12917089	0.750078	0	0.328645
97	rs12933061	0.750001	0.00272975	0.249999
97	rs66662761	0.00272975	0.00272975	0.691414
97	rs60560408	0.441483	0.00272975	0.558474
97	rs8050866	0.749997	0.00272975	0.269774
98	rs200438831	0.749998	1.26841e-92	1
98	rs4781517	0.749993	2.34337e-91	1
98	rs6498447	0.75001	5.96897e-97	0.24999
98	rs7404413	0.721235	5.96901e-97	0.278765
99	rs7185840	0.995243	0	1
99	rs2070939	0.994832	0	1
101	rs142463528	0.990538	0	0.266182
101	rs4471760	0.702328	0	0.303612
101	rs11081827	0.729819	0	0.270181
101	rs11877389	0.689661	0	0.310339
103	rs75048819	0.748691	0	0.253629
103	rs1346914	0.700095	0	0.295425
104	rs1530901	2.5254e-40	2.56165e-89	1
104	rs73962613	1.50074e-43	2.65425e-89	1
104	rs896517	0.993844	2.62039e-89	0.00615642
104	rs4274507	0.992445	2.57923e-89	0.176233
104	rs17089535	0.520991	2.5174e-89	0.00220207
104	rs17569426	0.988217	2.70411e-89	0.0117835
104	rs4800947	0.749998	2.51776e-89	0.250002
104	rs12606521	0.601473	2.64593e-89	0.371513
107	rs73622651	0.749992	0.00233295	0.329893
107	rs3765456	0.749965	0.00233337	0.321365
108	rs17632	0.954846	0	0.00448662
108	rs11697622	0.994177	0	0.0058234
108	rs6063360	0.995012	0	0.00498785
108	rs6125577	0.764269	0	0.00354255
109	rs35445172	0.987288	0	0.0127118
109	rs5751074	0.992012	0	0.00757058
110	rs202073156	0.624366	0.00598585	0.375343
110	rs7285579	0.521829	0.0061365	0.46878
110	rs62228096	0.739236	0.00562616	0.272423
110	rs7292297	0.609681	0.00554592	0.272947
110	rs7291412	0.641283	0.0060971	0.360004

## Sheet: S7
S7.eQTL gene annotation using available brain tissue datasets in FUMA.
ensg	symbol	chr	start	end	strand	type	entrezID	HUGO	pLI	ncRVIS	posMapSNPs	posMapMaxCADD	eqtlMapSNPs	eqtlMapminP	eqtlMapminQ	eqtlMapts	eqtlDirection	ciMap	ciMapts	minGwasP	IndSigSNPs	GenomicLocus
ENSG00000049245	VAMP3	1	7831329	7841492	1	protein_coding	9341	VAMP3	0.0542631	-0.084151	0	0	9	2.2236e-07	0.000722922	eQTLGen_cis_eQTLs	NA	Yes	Adult_Cortex:Fetal_Cortex:Mesendoderm:hESC	2.094e-09	rs301806	1
ENSG00000049246	PER3	1	7844380	7905237	1	protein_coding	8863	PER3	2.19068e-10	-0.648392	0	0	4	1.8035e-19	0	eQTLGen_trans_eQTLs	NA	No	NA	1.527e-07	rs13054099;rs5751069	109
ENSG00000049247	UTS2	1	7903143	7913572	-1	protein_coding	10911	UTS2	0.151041	0.0832603	0	0	15	0.000302423	0.0217532	PsychENCODE_eQTLs	NA	No	NA	0.00602	rs301806	1
ENSG00000116285	ERRFI1	1	8064464	8086368	-1	protein_coding	54206	ERRFI1	0.0465516	0.149373	0	0	7	7.2982e-06	0.0207589	eQTLGen_cis_eQTLs	NA	Yes	Promoter_anchored_loops:Aorta:Left_Ventricle:Liver:GM12878:IMR90:Mesenchymal_Stem_Cell:Mesendoderm:Neural_Progenitor_Cell:Trophoblast-like_Cell:hESC	2.094e-09	rs301806	1
ENSG00000162426	SLC45A1	1	8377886	8404227	1	protein_coding	50651	SLC45A1	0.0451893	NA	6	15.76	227	8.25284e-20	7.73276e-23	PsychENCODE_eQTLs:eQTLGen_cis_eQTLs:CMC_SVA_cis:GTEx/v8/Artery_Aorta:GTEx/v8/Heart_Atrial_Appendage:GTEx/v8/Heart_Left_Ventricle:GTEx/v8/Lung:GTEx/v8/Muscle_Skeletal:GTEx/v8/Cells_Cultured_fibroblasts:GTEx/v8/Thyroid:GTEx/v7/Artery_Aorta:GTEx/v7/Heart_Left_Ventricle:GTEx/v7/Lung:GTEx/v7/Muscle_Skeletal:GTEx/v7/Thyroid:GTEx/v6/Heart_Left_Ventricle:GTEx/v6/Muscle_Skeletal	NA	Yes	Adult_Cortex:Fetal_Cortex:Left_Ventricle:IMR90:Mesenchymal_Stem_Cell:Mesendoderm	2.094e-09	rs301806	1
ENSG00000142599	RERE	1	8412457	8877702	-1	protein_coding	473	RERE	0.999996	-0.582722	303	18.54	302	3.27170000000001e-310	0	EyeGEx:eQTLcatalogue/BLUEPRINT_ge_monocyte:eQTLcatalogue/BLUEPRINT_ge_neutrophil:eQTLcatalogue/BLUEPRINT_ge_T-cell:eQTLcatalogue/CEDAR_T-cell_CD4:eQTLcatalogue/CEDAR_T-cell_CD8:eQTLcatalogue/Fairfax_2012_B-cell_CD19:eQTLcatalogue/Fairfax_2014_naive:eQTLcatalogue/Kasela_2017_T-cell_CD4:eQTLcatalogue/Kasela_2017_T-cell_CD8:eQTLcatalogue/Lepik_2017_ge_blood:eQTLcatalogue/TwinsUK_ge_blood:eQTLcatalog…	NA	Yes	Promoter_anchored_loops:Liver:GM12878:IMR90:Mesenchymal_Stem_Cell:Trophoblast-like_Cell	2.094e-09	rs301806	1
ENSG00000074800	ENO1	1	8921061	8939308	-1	protein_coding	2023	ENO1	0.0103734	-0.884759	0	0	262	4.3938e-46	0	eQTLcatalogue/BLUEPRINT_ge_monocyte:eQTLcatalogue/BLUEPRINT_ge_T-cell:eQTLcatalogue/GENCORD_ge_fibroblast:eQTLGen_cis_eQTLs:BIOSQTL/BIOS_eQTL_geneLevel:GTEx/v8/Adipose_Subcutaneous:GTEx/v8/Artery_Aorta:GTEx/v8/Artery_Tibial:GTEx/v8/Heart_Atrial_Appendage:GTEx/v8/Heart_Left_Ventricle:GTEx/v8/Lung:GTEx/v8/Nerve_Tibial:GTEx/v8/Cells_Cultured_fibroblasts:GTEx/v7/Adipose_Subcutaneous:GTEx/v7/Artery_Ti…	NA	Yes	Adult_Cortex:Fetal_Cortex:Left_Ventricle:Liver:Spleen:GM12878:IMR90:Mesenchymal_Stem_Cell:Trophoblast-like_Cell	2.094e-09	rs301806	1
ENSG00000131686	CA6	1	9005926	9035151	1	protein_coding	765	CA6	0.00802362	0.488276	0	0	21	4.2199e-21	0	PsychENCODE_eQTLs:eQTLGen_cis_eQTLs	NA	No	NA	0.00602	rs301806	1
ENSG00000171603	CLSTN1	1	9789084	9884584	-1	protein_coding	22883	CLSTN1	0.844214	NA	0	0	2	5.6898e-06	0.0366926	eQTLGen_trans_eQTLs	NA	Yes	Adult_Cortex	0.0001615	rs13054099;rs5751069;rs301806	0.117361
ENSG00000162545	CAMK2N1	1	20808884	20812713	-1	protein_coding	55450	CAMK2N1	0.138563	NA	0	0	1	2.5712e-06	0.0188531	eQTLGen_trans_eQTLs	NA	No	NA	0.03871	rs13054099	109
ENSG00000054118	THRAP3	1	36690017	36770958	1	protein_coding	9967	THRAP3	0.999997	-0.284683	0	0	2	0.0004379	0.0353145	TIGER/Nom_Alonso_Pancreatic_islets	NA	No	NA	4.021e-07	rs2102341	2
ENSG00000142694	EVA1B	1	36787632	36789755	-1	protein_coding	55194	EVA1B	0.656675	-0.296674	0	0	1	9.47986e-06	0.0397218	GTEx/v7/Liver	NA	No	NA	1.106e-12	rs2102341	2
ENSG00000116883	RP11-268J15.5	1	36789335	36794822	1	protein_coding	NA	NA	NA	NA	0	0	4	4.71086e-05	1.73647e-18	GTEx/v8/Adipose_Subcutaneous:GTEx/v8/Breast_Mammary_Tissue	NA	No	NA	4.877e-08	rs2102341	2
ENSG00000119535	CSF3R	1	36931644	36948879	-1	protein_coding	1441	CSF3R	1.41619e-06	-0.493499	0	0	14	2.13526e-05	0.0308795	GTEx/v8/Spleen	NA	No	NA	1.887e-07	rs2102341	2
ENSG00000163873	GRIK3	1	37261128	37499730	-1	protein_coding	2899	GRIK3	0.99998	-3.4481	3	1.438	0	NA	NA	NA	NA	Yes	EP_correlation_organ_oneway:Left_Ventricle:IMR90:Mesenchymal_Stem_Cell:Mesendoderm:Neural_Progenitor_Cell:Trophoblast-like_Cell:hESC	4.258e-13	rs2102341	2
ENSG00000163874	ZC3H12A	1	37940153	37949980	1	protein_coding	102465438	ZC3H12A	0.911633	-0.681914	0	0	3	9.77886e-05	0.00771082	GTEx/v8/Muscle_Skeletal	NA	Yes	IMR90:Mesenchymal_Stem_Cell:Mesendoderm	4.258e-13	rs2102341	2
ENSG00000183317	EPHA10	1	38179552	38230805	-1	protein_coding	284656	EPHA10	3.15992e-18	0.371972	0	0	3	NA	0.049	CMC_SVA_cis	NA	Yes	IMR90:Mesenchymal_Stem_Cell	4.258e-13	rs2102341	2
ENSG00000117481	NSUN4	1	46805849	46830824	1	protein_coding	387338	NSUN4	1.38868e-06	0.106941	0	0	10	1.5803e-06	0.00467808	eQTLGen_cis_eQTLs	NA	No	NA	0.0001194	rs7534271	3
ENSG00000079277	MKNK1	1	47023090	47082515	-1	protein_coding	8569	MKNK1	0.000222399	-0.663848	0	0	1	1.5702e-05	0.0433918	eQTLGen_cis_eQTLs	NA	Yes	Adult_Cortex	0.0001769	rs7534271	3
ENSG00000123472	ATPAF1	1	47098409	47139539	-1	protein_coding	64756	ATPAF1	0.236383	0.513623	0	0	1	9.14468e-05	0.0351094	EyeGEx	NA	Yes	Adult_Cortex:Mesenchymal_Stem_Cell	0.0001769	rs7534271	3
ENSG00000162365	CYP4A22	1	47603107	47615413	1	protein_coding	284541	CYP4A22	1.42218e-08	2.25067	0	0	6	0.000239777	8.95028e-10	GTEx/v8/Thyroid	NA	No	NA	0.007533	rs7534271	3
ENSG00000162366	PDZK1IP1	1	47649265	47656716	-1	protein_coding	10158	PDZK1IP1	0.000484065	-0.343318	6	6.49	46	3.27170000000001e-310	0	eQTLcatalogue/CEDAR_platelet:eQTLcatalogue/Lepik_2017_ge_blood:eQTLcatalogue/TwinsUK_ge_blood:eQTLcatalogue/TwinsUK_ge_fat:PsychENCODE_eQTLs:eQTLGen_cis_eQTLs:BIOSQTL/BIOS_eQTL_geneLevel:GTEx/v8/Adipose_Subcutaneous:GTEx/v8/Adrenal_Gland:GTEx/v8/Whole_Blood:GTEx/v8/Artery_Aorta:GTEx/v8/Artery_Coronary:GTEx/v8/Artery_Tibial:GTEx/v8/Brain_Caudate_basal_ganglia:GTEx/v8/Brain_Cortex:GTEx/v8/Brain_Nuc…	NA	Yes	Promoter_anchored_loops	4.673e-08	rs7534271	3
ENSG00000162367	TAL1	1	47681962	47697892	-1	protein_coding	6886	TAL1	0.824692	-0.797257	22	15.21	47	4.91393e-162	0	eQTLGen_cis_eQTLs:BIOSQTL/BIOS_eQTL_geneLevel:CMC_SVA_cis:GTEx/v8/Artery_Aorta:GTEx/v8/Artery_Tibial:GTEx/v8/Brain_Cortex:GTEx/v8/Colon_Transverse:GTEx/v8/Esophagus_Gastroesophageal_Junction:GTEx/v8/Esophagus_Mucosa:GTEx/v8/Esophagus_Muscularis:GTEx/v8/Heart_Atrial_Appendage:GTEx/v8/Heart_Left_Ventricle:GTEx/v8/Lung:GTEx/v8/Muscle_Skeletal:GTEx/v8/Pancreas:GTEx/v8/Skin_Sun_Exposed_Lower_leg:GTEx/…	NA	Yes	Promoter_anchored_loops	4.673e-08	rs7534271	3
ENSG00000123473	STIL	1	47715811	47779819	-1	protein_coding	6491	STIL	0.202688	-0.12975	19	17.09	23	1.3015e-10	0	eQTLcatalogue/BLUEPRINT_ge_monocyte:eQTLcatalogue/CEDAR_transverse_colon:eQTLcatalogue/GEUVADIS_ge_LCL:eQTLcatalogue/TwinsUK_ge_fat:eQTLcatalogue/TwinsUK_ge_LCL:eQTLGen_cis_eQTLs:GTEx/v8/Adipose_Subcutaneous:GTEx/v8/Artery_Aorta:GTEx/v8/Colon_Transverse:GTEx/v8/Heart_Atrial_Appendage:GTEx/v7/Artery_Aorta	NA	Yes	Adult_Cortex:IMR90:Mesendoderm	6.055e-06	rs7534271	3
ENSG00000162368	CMPK1	1	47799469	47844511	1	protein_coding	51727	CMPK1	0.319274	-0.0429604	10	17.09	47	8.4033e-108	0	eQTLcatalogue/BLUEPRINT_ge_T-cell:eQTLcatalogue/CEDAR_rectum:eQTLcatalogue/CEDAR_transverse_colon:eQTLcatalogue/Fairfax_2014_IFN24:eQTLcatalogue/Fairfax_2014_LPS24:eQTLcatalogue/Fairfax_2014_LPS2:eQTLcatalogue/Quach_2016_ge_monocyte_Pam3CSK4:PsychENCODE_eQTLs:eQTLGen_cis_eQTLs:BIOSQTL/BIOS_eQTL_geneLevel:xQTLServer_eQTLs:CMC_SVA_cis:CMC_NoSVA_cis:GTEx/v8/Adipose_Visceral_Omentum:GTEx/v8/Artery_Ao…	NA	Yes	IMR90:Mesendoderm	4.673e-08	rs7534271	3
ENSG00000186790	FOXE3	1	47881744	47883723	1	protein_coding	2301	FOXE3	NA	-0.345112	0	0	42	4.81787e-11	1.27729e-08	TIGER/Nom_Alonso_Pancreatic_islets:GTEx/v8/Artery_Aorta:GTEx/v8/Artery_Tibial:GTEx/v8/Brain_Cerebellar_Hemisphere:GTEx/v8/Brain_Cerebellum:GTEx/v8/Brain_Frontal_Cortex_BA9:GTEx/v8/Skin_Not_Sun_Exposed_Suprapubic:GTEx/v8/Skin_Sun_Exposed_Lower_leg:GTEx/v7/Artery_Aorta:GTEx/v7/Artery_Tibial:GTEx/v7/Brain_Cerebellum:GTEx/v6/Brain_Cerebellum	NA	No	NA	4.673e-08	rs7534271	3
ENSG00000186564	FOXD2	1	47901689	47906363	1	protein_coding	2306	FOXD2	NA	-0.586902	0	0	7	7.18299e-08	1.61155e-07	GTEx/v8/Nerve_Tibial:GTEx/v8/Cells_Cultured_fibroblasts:GTEx/v8/Skin_Not_Sun_Exposed_Suprapubic:GTEx/v7/Nerve_Tibial	NA	Yes	Fetal_Cortex	4.673e-08	rs7534271	3
ENSG00000186094	AGBL4	1	48998527	50489585	-1	protein_coding	84871	AGBL4	3.5783e-06	-0.0363485	171	18.99	34	2.32063e-05	0.00396741	GTEx/v8/Ovary:GTEx/v8/Thyroid:GTEx/v7/Thyroid	NA	Yes	Adult_Cortex:Fetal_Cortex:Aorta:Left_Ventricle:Liver:Right_Ventricle:IMR90:Mesenchymal_Stem_Cell:Mesendoderm:Neural_Progenitor_Cell:Trophoblast-like_Cell:hESC	1.013e-08	rs11579246	4
ENSG00000162373	BEND5	1	49193195	49242641	-1	protein_coding	79656	BEND5	0.114991	NA	0	0	44	1.0289e-11	0	eQTLGen_cis_eQTLs:eQTLGen_trans_eQTLs:GTEx/v8/Artery_Tibial:GTEx/v8/Esophagus_Muscularis:GTEx/v8/Muscle_Skeletal	NA	Yes	Adult_Cortex:Fetal_Cortex:Left_Ventricle:IMR90:Mesenchymal_Stem_Cell:Mesendoderm:hESC	1.013e-08	rs11579246;rs9074	0.240972
ENSG00000227839	AL645730.2	1	50459990	50461874	1	protein_coding	NA	NA	NA	NA	6	12.14	0	NA	NA	NA	NA	Yes	Promoter_anchored_loops:IMR90:Mesenchymal_Stem_Cell:Mesendoderm:Trophoblast-like_Cell:hESC	1.013e-08	rs11579246	4
ENSG00000162374	ELAVL4	1	50513686	50669458	1	protein_coding	1996	ELAVL4	0.976913	-0.16678	28	18.24	136	5.89371e-10	2.94685e-06	eQTLcatalogue/Fairfax_2014_IFN24	NA	Yes	Adult_Cortex:Fetal_Cortex:Aorta:Left_Ventricle:Liver:Right_Ventricle:IMR90:Mesenchymal_Stem_Cell:Mesendoderm:Neural_Progenitor_Cell:Trophoblast-like_Cell:hESC	1.013e-08	rs11579246	4
ENSG00000085831	TTC39A	1	51752930	51810788	-1	protein_coding	22996	TTC39A	0.0983103	0.6347	0	0	15	1.64765e-06	2.06041e-13	CMC_NoSVA_cis:GTEx/v8/Thyroid:GTEx/v7/Thyroid	NA	Yes	IMR90:Mesenchymal_Stem_Cell	2.647e-11	rs12135327	5
ENSG00000085832	EPS15	1	51819935	51985000	-1	protein_coding	2060	EPS15	0.241707	0.515123	0	0	5	9.80546e-06	1.18284e-78	GTEx/v8/Adipose_Subcutaneous:GTEx/v8/Skin_Sun_Exposed_Lower_leg:GTEx/v7/Skin_Sun_Exposed_Lower_leg	NA	Yes	GM12878:IMR90:Mesenchymal_Stem_Cell:Trophoblast-like_Cell	1.282e-06	rs12135327	5
ENSG00000117859	OSBPL9	1	52042851	52254889	1	protein_coding	114883	OSBPL9	0.998515	0.292264	1	2.503	35	4.21134e-26	0	BIOSQTL/BIOS_eQTL_geneLevel:GTEx/v8/Heart_Atrial_Appendage	NA	Yes	Adult_Cortex:GM12878:IMR90:Mesenchymal_Stem_Cell:Mesendoderm:Trophoblast-like_Cell	2.647e-11	rs12135327	5
ENSG00000078618	NRD1	1	52254863	52344477	-1	protein_coding	4898	NRD1	0.878722	-0.426817	29	18.36	62	1.6501e-254	0	EyeGEx:eQTLcatalogue/BLUEPRINT_ge_monocyte:eQTLcatalogue/BLUEPRINT_ge_neutrophil:eQTLcatalogue/CEDAR_neutrophil_CD15:eQTLcatalogue/Fairfax_2014_LPS2:eQTLcatalogue/Lepik_2017_ge_blood:eQTLcatalogue/Quach_2016_ge_monocyte_IAV:eQTLcatalogue/Quach_2016_ge_monocyte_LPS:eQTLcatalogue/Quach_2016_ge_monocyte_naive:eQTLcatalogue/Quach_2016_ge_monocyte_Pam3CSK4:eQTLcatalogue/Quach_2016_ge_monocyte_R848:eQT…	NA	Yes	Adult_Cortex:Fetal_Cortex:Left_Ventricle:Liver:Spleen:GM12878:IMR90:Mesenchymal_Stem_Cell:Mesendoderm:Trophoblast-like_Cell:hESC	2.647e-11	rs12135327;rs12135327:rs11579246	04:05:00
ENSG00000169213	RAB3B	1	52373628	52456436	-1	protein_coding	5865	RAB3B	0.156443	-1.51927	28	13.45	60	5.2894e-16	2.22834e-12	EyeGEx:eQTLcatalogue/CEDAR_rectum:eQTLcatalogue/HipSci_ge_iPSC:PsychENCODE_eQTLs:CMC_SVA_cis:GTEx/v8/Brain_Caudate_basal_ganglia:GTEx/v8/Brain_Cortex:GTEx/v8/Nerve_Tibial:GTEx/v8/Cells_Cultured_fibroblasts:GTEx/v8/Skin_Sun_Exposed_Lower_leg:GTEx/v7/Colon_Transverse:GTEx/v7/Cells_Transformed_fibroblasts:GTEx/v6/Cells_Transformed_fibroblasts	NA	Yes	Promoter_anchored_loops:IMR90:Mesenchymal_Stem_Cell	2.647e-11	rs12135327	5
ENSG00000117862	TXNDC12	1	52485803	52521843	-1	protein_coding	51060	TXNDC12	0.344869	-1.05563	0	0	31	6.6224e-48	0	eQTLGen_cis_eQTLs:BIOSQTL/BIOS_eQTL_geneLevel:CMC_SVA_cis:CMC_NoSVA_cis	NA	Yes	Adult_Cortex:Fetal_Cortex:Left_Ventricle:Liver:GM12878:IMR90:Mesenchymal_Stem_Cell:Mesendoderm:Trophoblast-like_Cell:hESC	2.647e-11	rs12135327	5
ENSG00000134717	BTF3L4	1	52521797	52556388	1	protein_coding	91408	BTF3L4	0.4513	-1.14919	1	1.177	5	4.65102e-09	5.97265e-06	eQTLcatalogue/Fairfax_2014_IFN24:BIOSQTL/BIOS_eQTL_geneLevel	NA	Yes	Adult_Cortex:Fetal_Cortex:Left_Ventricle:Liver:GM12878:IMR90:Mesenchymal_Stem_Cell:Mesendoderm:Trophoblast-like_Cell:hESC	2.647e-11	rs12135327	5
ENSG00000157077	ZFYVE9	1	52608046	52812358	1	protein_coding	9372	ZFYVE9	0.943797	NA	4	7.598	0	NA	NA	NA	NA	Yes	Liver:IMR90:Mesenchymal_Stem_Cell:Mesendoderm:Trophoblast-like_Cell:hESC	1.282e-06	rs12135327	5
ENSG00000154222	CC2D1B	1	52811395	52831865	-1	protein_coding	200014	CC2D1B	4.76315e-10	-1.10104	2	7.598	62	6.07781e-141	0	eQTLcatalogue/CEDAR_ileum:eQTLcatalogue/CEDAR_monocyte_CD14:eQTLcatalogue/CEDAR_neutrophil_CD15:eQTLcatalogue/CEDAR_rectum:eQTLcatalogue/CEDAR_T-cell_CD4:eQTLcatalogue/CEDAR_T-cell_CD8:eQTLcatalogue/CEDAR_transverse_colon:eQTLcatalogue/Fairfax_2012_B-cell_CD19:eQTLcatalogue/Fairfax_2014_IFN24:eQTLcatalogue/Fairfax_2014_LPS24:eQTLcatalogue/Fairfax_2014_LPS2:eQTLcatalogue/Fairfax_2014_naive:eQTLcat…	NA	Yes	IMR90:Mesenchymal_Stem_Cell:Mesendoderm:Trophoblast-like_Cell:hESC	2.647e-11	rs12135327	5
ENSG00000085840	ORC1	1	52838501	52870131	-1	protein_coding	4998	ORC1	3.3888e-05	-0.353803	1	1.459	0	NA	NA	NA	NA	Yes	Liver:GM12878:IMR90:Mesenchymal_Stem_Cell:Mesendoderm:Trophoblast-like_Cell:hESC	0.008244	rs12135327	5
ENSG00000134748	PRPF38A	1	52870236	52886511	1	protein_coding	84950	PRPF38A	0.996468	-1.57278	0	0	24	1.2386e-12	0	eQTLGen_cis_eQTLs:GTEx/v8/Whole_Blood:GTEx/v8/Artery_Tibial:GTEx/v8/Breast_Mammary_Tissue:GTEx/v8/Nerve_Tibial:GTEx/v7/Artery_Tibial	NA	Yes	Liver:GM12878:IMR90:Mesenchymal_Stem_Cell:Mesendoderm:Trophoblast-like_Cell:hESC	1.372e-05	rs12135327	5
ENSG00000134744	ZCCHC11	1	52873954	53019159	-1	protein_coding	23318	ZCCHC11	1	-0.187276	4	9.649	38	2.6637e-19	0	EyeGEx:eQTLcatalogue/Kasela_2017_T-cell_CD4:PsychENCODE_eQTLs:eQTLGen_cis_eQTLs:GTEx/v8/Adipose_Subcutaneous:GTEx/v8/Adipose_Visceral_Omentum:GTEx/v8/Adrenal_Gland:GTEx/v8/Artery_Tibial:GTEx/v8/Brain_Cerebellum:GTEx/v8/Brain_Cortex:GTEx/v8/Brain_Hippocampus:GTEx/v8/Brain_Hypothalamus:GTEx/v8/Breast_Mammary_Tissue:GTEx/v8/Colon_Sigmoid:GTEx/v8/Esophagus_Gastroesophageal_Junction:GTEx/v8/Esophagus_…	NA	Yes	IMR90:Mesenchymal_Stem_Cell	2.647e-11	rs12135327	5
ENSG00000116157	GPX7	1	53068044	53074723	1	protein_coding	2882	GPX7	0.000179755	0.204894	0	0	48	3.5991e-213	0	TIGER/Nom_Alonso_Pancreatic_islets:eQTLcatalogue/Fairfax_2014_LPS2:eQTLcatalogue/Fairfax_2014_naive:eQTLcatalogue/Lepik_2017_ge_blood:eQTLcatalogue/TwinsUK_ge_fat:eQTLGen_cis_eQTLs:BIOSQTL/BIOS_eQTL_geneLevel:GTEx/v8/Adipose_Subcutaneous:GTEx/v8/Adipose_Visceral_Omentum:GTEx/v8/Adrenal_Gland:GTEx/v8/Whole_Blood:GTEx/v8/Artery_Aorta:GTEx/v8/Artery_Tibial:GTEx/v8/Breast_Mammary_Tissue:GTEx/v8/Esoph…	NA	Yes	Promoter_anchored_loops:Adrenal:Left_Ventricle:Liver:GM12878:IMR90:Mesenchymal_Stem_Cell:Mesendoderm:Neural_Progenitor_Cell:Trophoblast-like_Cell:hESC	2.647e-11	rs12135327	5
ENSG00000182183	FAM159A	1	53099016	53135355	1	protein_coding	348378	FAM159A	0.000284218	NA	0	0	23	1.3438e-30	0	eQTLcatalogue/Kasela_2017_T-cell_CD4:eQTLGen_cis_eQTLs:GTEx/v8/Nerve_Tibial	NA	Yes	Promoter_anchored_loops:Left_Ventricle:GM12878:IMR90:Mesenchymal_Stem_Cell:Mesendoderm:hESC	2.647e-11	rs12135327	5
ENSG00000162378	ZYG11B	1	53192126	53293014	1	protein_coding	79699	ZYG11B	0.999924	0.24388	0	0	10	1.1136e-11	0	PsychENCODE_eQTLs:DICE/T_CD4_naive_TREG:eQTLGen_cis_eQTLs	NA	Yes	Adult_Cortex:Fetal_Cortex:Left_Ventricle:GM12878:IMR90:Mesenchymal_Stem_Cell:Mesendoderm:hESC	1.333e-06	rs12135327	5
ENSG00000121310	ECHDC2	1	53361656	53392884	-1	protein_coding	55268	ECHDC2	1.18082e-07	0.192219	0	0	5	3.5022e-07	0.00113327	TIGER/Nom_Alonso_Pancreatic_islets:eQTLGen_cis_eQTLs	NA	Yes	Left_Ventricle:Liver:IMR90:Mesenchymal_Stem_Cell:Mesendoderm:Trophoblast-like_Cell:hESC	1.68e-06	rs12135327	5
ENSG00000172260	NEGR1	1	71861623	72748417	-1	protein_coding	257194	NEGR1	0.951349	-1.71358	290	17.93	375	1.0523e-211	0	EyeGEx:eQTLcatalogue/BLUEPRINT_ge_monocyte:eQTLcatalogue/GENCORD_ge_T-cell:eQTLcatalogue/HipSci_ge_iPSC:PsychENCODE_eQTLs:DICE/Monocyte_classical:DICE/Monocyte_non_classical:eQTLGen_cis_eQTLs:BIOSQTL/BIOS_eQTL_geneLevel:xQTLServer_eQTLs:CMC_SVA_cis:BRAINEAC/WHMT:GTEx/v8/Adipose_Visceral_Omentum:GTEx/v8/Brain_Caudate_basal_ganglia:GTEx/v8/Brain_Nucleus_accumbens_basal_ganglia:GTEx/v8/Brain_Putamen…	NA	Yes	EP_correlation_organ_oneway:Aorta:Left_Ventricle:Liver:Right_Ventricle:GM12878:IMR90:Mesenchymal_Stem_Cell:Mesendoderm:Neural_Progenitor_Cell:Trophoblast-like_Cell:hESC	7.984e-23	rs2821266;rs12128707;rs11209952;rs2126077;rs61765651;rs2821235;rs7415357;rs4571923;rs11210077;rs2126077:rs2821266;rs12128707:rs11209952;rs2821266:rs2126077;rs2821266:rs12128707:rs2821266:rs61765651;rs2821235:rs2821235:rs11209952;rs12128707:rs2126077;rs12128707:rs61765651;rs2821235:rs11209952;rs2821266:rs11209952;rs2821266:rs11209952:rs4571923:rs11210077:rs7415357:rs4571923;rs11210077:rs11209952;r…	6
ENSG00000116783	TNNI3K	1	74663947	75010112	1	protein_coding	100526835	TNNI3K	1.80292e-38	0.231252	0	0	1	1.69869e-05	0.032377	GTEx/v6/Lung	NA	Yes	IMR90:Mesenchymal_Stem_Cell:Mesendoderm:hESC	6.486e-22	rs11210077;rs12410714;rs2821266;rs12128707:rs11209952;rs2821266:rs2126077;rs2821266:rs12128707:rs2821266:rs61765651;rs2821235:rs2821235:rs11209952;rs12128707:rs2126077:rs11209952;rs2126077;rs12128707:rs2126077;rs12128707:rs61765651;rs2821235:rs11209952;rs2821266:rs11209952;rs2821235;rs2821266:rs11209952:rs11209952;rs2126077:rs11209952;rs61765651:rs11209952;rs61765651;rs2126077:rs61765651:rs112099…	6
ENSG00000171492	LRRC8D	1	90286573	90402170	1	protein_coding	55144	LRRC8D	0.868441	-0.0177701	0	0	2	2.0634e-08	0.000243828	eQTLGen_trans_eQTLs	NA	No	NA	0.0007836	rs13054099;rs5751069	109
ENSG00000122481	RWDD3	1	95699711	95712781	1	protein_coding	25950	RWDD3	1.52123e-06	NA	0	0	1	1.1092e-06	0.00890012	eQTLGen_trans_eQTLs	NA	No	NA	0.0007836	rs5751069	109
ENSG00000085465	OVGP1	1	111956936	111970399	-1	protein_coding	5016	OVGP1	0.000935884	0.174723	0	0	1	2.4845e-06	0.0183595	eQTLGen_trans_eQTLs	NA	No	NA	1.391e-05	rs9074	107
ENSG00000132185	FCRLA	1	161676762	161684142	1	protein_coding	84824	FCRLA	0.000166358	0.843595	0	0	1	1.1837e-07	0.00130843	eQTLGen_trans_eQTLs	NA	No	NA	1.391e-05	rs9074	107
ENSG00000094975	SUCO	1	172501489	172580971	1	protein_coding	51430	SUCO	0.302498	-0.66284	0	0	1	0.000142694	0.010864	GTEx/v8/Adipose_Visceral_Omentum	NA	Yes	Left_Ventricle:IMR90:Mesenchymal_Stem_Cell:Mesendoderm	7.316e-10	rs16846478	9
ENSG00000117592	PRDX6	1	173446405	173457946	1	protein_coding	9588	PRDX6	0.00998977	0.355549	6	8.929	110	5.1583e-114	0	EyeGEx:eQTLcatalogue/BLUEPRINT_ge_neutrophil:eQTLcatalogue/BLUEPRINT_ge_T-cell:eQTLcatalogue/CEDAR_T-cell_CD4:eQTLcatalogue/CEDAR_T-cell_CD8:eQTLcatalogue/Fairfax_2014_IFN24:eQTLcatalogue/Fairfax_2014_LPS2:eQTLcatalogue/Kasela_2017_T-cell_CD4:eQTLcatalogue/Lepik_2017_ge_blood:PsychENCODE_eQTLs:eQTLGen_cis_eQTLs:BIOSQTL/BIOS_eQTL_geneLevel:GTEx/v8/Whole_Blood:GTEx/v8/Heart_Atrial_Appendage:GTEx/v8…	NA	Yes	Promoter_anchored_loops:Adult_Cortex:Fetal_Cortex:Left_Ventricle:Liver:GM12878:IMR90:Mesenchymal_Stem_Cell:Mesendoderm:Trophoblast-like_Cell:hESC	7.316e-10	rs16846478	9
ENSG00000162753	SLC9C2	1	173469603	173572233	-1	protein_coding	284525	SLC9C2	1.18824e-06	-0.306606	10	11.47	14	7.11689e-17	1.28514e-17	EyeGEx:PsychENCODE_eQTLs:CMC_SVA_cis:CMC_SVA_trans:CMC_NoSVA_cis:CMC_NoSVA_trans:BRAINEAC/FCTX:BRAINEAC/OCTX:BRAINEAC/TCTX:BRAINEAC/aveALL:GTEx/v8/Brain_Amygdala:GTEx/v8/Brain_Anterior_cingulate_cortex_BA24:GTEx/v8/Brain_Caudate_basal_ganglia:GTEx/v8/Brain_Cortex:GTEx/v8/Brain_Frontal_Cortex_BA9:GTEx/v8/Brain_Nucleus_accumbens_basal_ganglia:GTEx/v8/Brain_Putamen_basal_ganglia:GTEx/v8/Lung:GTEx/v8…	NA	Yes	IMR90:Mesenchymal_Stem_Cell:Mesendoderm:hESC	1.739e-09	rs16846478	9
ENSG00000183831	ANKRD45	1	173578700	173639001	-1	protein_coding	339416	ANKRD45	0.0198873	-0.281297	12	13.36	94	1.93905e-21	1.9009e-46	EyeGEx:PsychENCODE_eQTLs:CMC_SVA_cis:GTEx/v8/Adipose_Subcutaneous:GTEx/v8/Artery_Tibial:GTEx/v8/Brain_Cortex:GTEx/v8/Brain_Nucleus_accumbens_basal_ganglia:GTEx/v8/Breast_Mammary_Tissue:GTEx/v8/Nerve_Tibial:GTEx/v8/Cells_Cultured_fibroblasts:GTEx/v8/Skin_Sun_Exposed_Lower_leg:GTEx/v8/Testis:GTEx/v8/Thyroid:GTEx/v7/Adipose_Subcutaneous:GTEx/v7/Artery_Tibial:GTEx/v7/Cells_Transformed_fibroblasts:GTE…	NA	Yes	Left_Ventricle:Liver:IMR90:Mesenchymal_Stem_Cell:Mesendoderm:Trophoblast-like_Cell:hESC	7.316e-10	rs16846478	9
ENSG00000076321	KLHL20	1	173684080	173755840	1	protein_coding	27252	KLHL20	0.0616771	-0.548347	4	5.822	8	2.994e-17	0	eQTLcatalogue/BLUEPRINT_ge_T-cell:eQTLGen_cis_eQTLs:GTEx/v8/Cells_Cultured_fibroblasts	NA	Yes	Left_Ventricle:Liver:GM12878:IMR90:Mesenchymal_Stem_Cell:Mesendoderm:Trophoblast-like_Cell:hESC	1.815e-08	rs16846478	9
ENSG00000120334	CENPL	1	173768688	173793858	-1	protein_coding	91687	CENPL	0.513926	-0.536935	6	6.96	48	1.60475e-07	0.00064254	eQTLcatalogue/Quach_2016_ge_monocyte_LPS:eQTLcatalogue/Quach_2016_ge_monocyte_Pam3CSK4:eQTLGen_cis_eQTLs:GTEx/v8/Brain_Frontal_Cortex_BA9:GTEx/v8/Skin_Not_Sun_Exposed_Suprapubic:GTEx/v8/Testis:GTEx/v7/Testis	NA	Yes	Adult_Cortex:Fetal_Cortex:Aorta:Left_Ventricle:Liver:Spleen:GM12878:IMR90:Mesenchymal_Stem_Cell:Mesendoderm:Neural_Progenitor_Cell:Trophoblast-like_Cell:hESC	7.316e-10	rs16846478	9
ENSG00000117593	DARS2	1	173793641	173827684	1	protein_coding	55157	DARS2	4.40768e-09	-1.4578	20	14.65	58	2.0791e-20	0	TIGER/Nom_Alonso_Pancreatic_islets:EyeGEx:eQTLcatalogue/HipSci_ge_iPSC:PsychENCODE_eQTLs:eQTLGen_cis_eQTLs:BIOSQTL/BIOS_eQTL_geneLevel:CMC_SVA_cis:CMC_NoSVA_cis:GTEx/v8/Adipose_Subcutaneous:GTEx/v8/Esophagus_Gastroesophageal_Junction:GTEx/v8/Esophagus_Mucosa:GTEx/v8/Esophagus_Muscularis:GTEx/v8/Heart_Atrial_Appendage:GTEx/v8/Heart_Left_Ventricle:GTEx/v8/Muscle_Skeletal:GTEx/v8/Nerve_Tibial:GTEx/v…	NA	Yes	Adult_Cortex:Fetal_Cortex:Aorta:Left_Ventricle:Liver:Spleen:GM12878:IMR90:Mesenchymal_Stem_Cell:Mesendoderm:Neural_Progenitor_Cell:Trophoblast-like_Cell:hESC	7.316e-10	rs16846478	9
ENSG00000185278	ZBTB37	1	173837220	173872687	1	protein_coding	84614	ZBTB37	0.734037	-0.469796	20	14.65	8	3.89402e-06	0.00185581	eQTLcatalogue/Quach_2016_ge_monocyte_Pam3CSK4:GTEx/v8/Esophagus_Mucosa	NA	Yes	Adult_Cortex:Fetal_Cortex:Aorta:Left_Ventricle:Liver:GM12878:IMR90:Mesenchymal_Stem_Cell:Mesendoderm:Neural_Progenitor_Cell:Trophoblast-like_Cell:hESC	7.316e-10	rs16846478	9
ENSG00000117601	SERPINC1	1	173872947	173886516	-1	protein_coding	462	SERPINC1	0.993264	-0.0171347	5	8.226	25	4.7219e-132	0	TIGER/Nom_Alonso_Pancreatic_islets:EyeGEx:eQTLcatalogue/Quach_2016_ge_monocyte_naive:PsychENCODE_eQTLs:DICE/Monocyte_classical:DICE/NK:eQTLGen_cis_eQTLs:BIOSQTL/BIOS_eQTL_geneLevel:GTEx/v8/Adipose_Subcutaneous:GTEx/v8/Adipose_Visceral_Omentum:GTEx/v8/Adrenal_Gland:GTEx/v8/Artery_Aorta:GTEx/v8/Artery_Coronary:GTEx/v8/Artery_Tibial:GTEx/v8/Brain_Caudate_basal_ganglia:GTEx/v8/Brain_Cortex:GTEx/v8/Co…	NA	Yes	Left_Ventricle:GM12878:IMR90:Mesenchymal_Stem_Cell:Mesendoderm:Trophoblast-like_Cell:hESC	7.316e-10	rs16846478	9
ENSG00000135870	RC3H1	1	173900352	173991435	-1	protein_coding	149041	RC3H1	0.99954	0.5239	17	9.916	66	9.76679e-12	1.60208e-10	eQTLGen_cis_eQTLs:GTEx/v8/Adrenal_Gland:GTEx/v8/Artery_Tibial:GTEx/v8/Esophagus_Muscularis:GTEx/v8/Nerve_Tibial:GTEx/v8/Pancreas:GTEx/v8/Cells_Cultured_fibroblasts:GTEx/v7/Cells_Transformed_fibroblasts:GTEx/v6/Adipose_Subcutaneous:GTEx/v6/Adrenal_Gland:GTEx/v6/Brain_Cortex:GTEx/v6/Esophagus_Muscularis:GTEx/v6/Nerve_Tibial:GTEx/v6/Cells_Transformed_fibroblasts	NA	Yes	Left_Ventricle:Liver:GM12878:IMR90:Mesenchymal_Stem_Cell:Mesendoderm:Trophoblast-like_Cell:hESC	7.316e-10	rs16846478	9
ENSG00000152061	RABGAP1L	1	174128548	174964445	1	protein_coding	9910	RABGAP1L	0.0891727	NA	95	15.89	181	2.834e-36	0	TIGER/Nom_Alonso_Pancreatic_islets:EyeGEx:eQTLcatalogue/BLUEPRINT_ge_T-cell:eQTLcatalogue/CEDAR_neutrophil_CD15:eQTLcatalogue/CEDAR_platelet:eQTLcatalogue/CEDAR_T-cell_CD4:eQTLcatalogue/Fairfax_2014_naive:eQTLcatalogue/GENCORD_ge_fibroblast:eQTLcatalogue/Nedelec_2016_ge_macrophage_naive:eQTLcatalogue/Quach_2016_ge_monocyte_naive:eQTLcatalogue/Quach_2016_ge_monocyte_Pam3CSK4:eQTLcatalogue/TwinsUK_…	NA	Yes	Left_Ventricle:Liver:GM12878:IMR90:Mesenchymal_Stem_Cell:Mesendoderm:Trophoblast-like_Cell:hESC	7.316e-10	rs16846478	9
ENSG00000203737	GPR52	1	174417212	174418683	1	protein_coding	9293	GPR52	0.0654586	-0.0326958	1	0.46	6	2.08992e-17	1.04496e-13	eQTLcatalogue/BLUEPRINT_ge_neutrophil:GTEx/v8/Skin_Not_Sun_Exposed_Suprapubic	NA	Yes	Adult_Cortex:Fetal_Cortex:Aorta:Left_Ventricle:Liver:Right_Ventricle:GM12878:IMR90:Mesenchymal_Stem_Cell:Mesendoderm:Neural_Progenitor_Cell:Trophoblast-like_Cell:hESC	2.355e-06	rs16846478	9
ENSG00000120333	MRPS14	1	174979925	174992561	-1	protein_coding	63931	MRPS14	0.00165874	-0.0352662	0	0	1	3.77402e-08	0.000188701	eQTLcatalogue/HipSci_ge_iPSC	NA	Yes	GM12878:IMR90:Mesenchymal_Stem_Cell:Mesendoderm:hESC	7.316e-10	rs16846478;rs16846478:rs12741940:rs10913112:rs10913112;rs12741940	09:10:00
ENSG00000120332	TNN	1	175036994	175117202	1	protein_coding	63923	TNN	5.19248e-15	-0.261805	0	0	61	4.33941e-08	1.08169e-08	PsychENCODE_eQTLs:GTEx/v8/Liver	NA	Yes	Left_Ventricle:IMR90:Mesenchymal_Stem_Cell:Mesendoderm:Trophoblast-like_Cell:hESC	2.178e-12	rs16846478;rs16846478:rs12741940:rs10913112:rs10913112;rs12741940:rs16851203;rs56172555:rs16851203	09:10:11
ENSG00000235750	KIAA0040	1	175126123	175162135	-1	protein_coding	9674	KIAA0040	NA	NA	0	0	3	9.8006e-07	9.76385e-07	eQTLGen_cis_eQTLs:GTEx/v8/Lung	NA	Yes	Left_Ventricle:GM12878:IMR90:Mesenchymal_Stem_Cell:Mesendoderm:Trophoblast-like_Cell:hESC	1.142e-12	rs16846478;rs12741940;rs12741940:rs10913112:rs10913112;rs12741940:rs16846478:rs56172555:rs16851203;rs56172555:rs16851203	09:10:11
ENSG00000143207	RFWD2	1	175913967	176176629	-1	protein_coding	64326	RFWD2	0.998566	NA	98	15.3	205	1.0517e-24	0	TIGER/Nom_Alonso_Pancreatic_islets:EyeGEx:eQTLcatalogue/Alasoo_2018_ge_macrophage_Salmonella:eQTLcatalogue/Fairfax_2014_LPS24:eQTLcatalogue/Fairfax_2014_LPS2:eQTLcatalogue/Nedelec_2016_ge_macrophage_Listeria:eQTLcatalogue/Nedelec_2016_ge_macrophage_naive:eQTLcatalogue/Nedelec_2016_ge_macrophage_Salmonella:eQTLcatalogue/Quach_2016_ge_monocyte_LPS:eQTLcatalogue/Quach_2016_ge_monocyte_Pam3CSK4:eQTLc…	NA	Yes	Liver:GM12878:IMR90:Mesenchymal_Stem_Cell:Mesendoderm:Trophoblast-like_Cell:hESC	5.366e-10	rs10913112;rs12741940;rs12741940:rs10913112:rs10913112;rs12741940:rs16851203;rs56172555	10:11:00
ENSG00000116183	PAPPA2	1	176432307	176814735	1	protein_coding	60676	PAPPA2	0.00125005	0.692747	1	1.983	199	1.41728e-33	7.0864e-30	eQTLcatalogue/HipSci_ge_iPSC:CMC_SVA_cis	NA	Yes	Aorta:Left_Ventricle:Pancreas:IMR90:Mesenchymal_Stem_Cell:Mesendoderm:Trophoblast-like_Cell:hESC	2.178e-12	rs12741940;rs10913112;rs12741940:rs12741940:rs10913112:rs16846478:rs16851203:rs16851203;rs56172555:rs56172555	09:10:11
ENSG00000152092	ASTN1	1	176826438	177134109	-1	protein_coding	460	ASTN1	0.999416	-0.346376	0	0	5	1.32781e-05	0.021858	GTEx/v8/Breast_Mammary_Tissue	NA	Yes	IMR90:Mesenchymal_Stem_Cell:Mesendoderm:Trophoblast-like_Cell:hESC	8.589e-13	rs56172555;rs16851203;rs56172555:rs56172555:rs16851203:rs10913112;rs12741940:rs12741940:rs10913112	10:11:00
ENSG00000198797	BRINP2	1	177140633	177251558	1	protein_coding	57795	BRINP2	0.999086	-0.807649	14	14.69	55	1.43493e-05	0.0173366	BRAINEAC/THAL	NA	Yes	IMR90:Mesenchymal_Stem_Cell:Mesendoderm:Trophoblast-like_Cell:hESC	8.589e-13	rs16851203;rs56172555;rs10913112;rs12741940;rs56172555:rs56172555:rs16851203:rs10913112;rs12741940:rs12741940:rs10913112	10:11:00
ENSG00000135862	LAMC1	1	182992595	183114727	1	protein_coding	3915	LAMC1	1	2.11728	0	0	1	5.0572e-06	0.0332078	eQTLGen_trans_eQTLs	NA	No	NA	1.391e-05	rs9074	107
ENSG00000116701	NCF2	1	183524698	183560011	-1	protein_coding	4688	NCF2	8.50962e-05	0.149389	0	0	3	5.9203e-07	0.00518302	eQTLGen_trans_eQTLs	NA	No	NA	1.071e-12	rs7617480;rs62262722	24
ENSG00000162687	KCNT2	1	196194909	196578355	-1	protein_coding	343450	KCNT2	0.666802	0.148619	0	0	1	9.4912e-06	0.047456	eQTLcatalogue/CEDAR_T-cell_CD8	NA	Yes	Mesenchymal_Stem_Cell	3.513e-12	rs2477077;rs35207123;rs7534863;rs2201956	12
ENSG00000000971	CFH	1	196621008	196716634	1	protein_coding	3075	CFH	0.999631	0.906065	0	0	1	0.000647286	0.0407943	PsychENCODE_eQTLs	NA	No	NA	NA	rs2477077;rs2201956	12
ENSG00000116785	CFHR3	1	196743925	196763203	1	protein_coding	10878	CFHR3	1.21902e-05	1.72411	0	0	4	1.79824e-05	0.000270753	GTEx/v6/Adipose_Subcutaneous	NA	No	NA	1.661e-10	rs2477077;rs2201956	12
ENSG00000134365	CFHR4	1	196819371	196888102	1	protein_coding	10877	CFHR4	1.89813e-13	-0.12931	0	0	1	0.000666308	0.0417621	PsychENCODE_eQTLs	NA	No	NA	0.01073	rs2201956	12
ENSG00000066279	ASPM	1	197053258	197115824	-1	protein_coding	259266	ASPM	6.16439e-26	-0.0535729	0	0	2	4.90687e-05	0.0467593	GTEx/v8/Adrenal_Gland	NA	Yes	Mesenchymal_Stem_Cell:Mesendoderm:hESC	1.242e-13	rs2201956;rs7534863;rs2201956:rs2477077;rs35207123;rs7534863:rs2201956;rs7534863:rs2477077;rs7534863:rs7534863:rs2477077	12
ENSG00000177888	ZBTB41	1	197122810	197169672	-1	protein_coding	360023	ZBTB41	0.769627	-1.12177	0	0	2	0.00019696	0.0151181	PsychENCODE_eQTLs	NA	Yes	Left_Ventricle:Mesenchymal_Stem_Cell:Mesendoderm:hESC	1.242e-13	rs7534863;rs2477077;rs2201956:rs2477077;rs35207123;rs7534863:rs2201956;rs7534863:rs2477077;rs7534863:rs7534863:rs2477077;rs2201956;rs7534863:rs2477077:rs2477077	12
ENSG00000134376	CRB1	1	197170592	197447585	1	protein_coding	23418	CRB1	3.35698e-09	-0.367869	60	14.79	46	3.02224e-11	1.52188e-07	TIGER/Nom_Alonso_Pancreatic_islets:PsychENCODE_eQTLs:GTEx/v8/Brain_Cerebellum:GTEx/v8/Brain_Cortex:GTEx/v8/Brain_Nucleus_accumbens_basal_ganglia:GTEx/v8/Muscle_Skeletal:GTEx/v8/Testis:GTEx/v7/Brain_Cerebellum:GTEx/v7/Muscle_Skeletal	NA	Yes	Left_Ventricle:Mesenchymal_Stem_Cell:Mesendoderm:hESC	1.242e-13	rs2201956;rs7534863;rs2477077;rs35207123;rs2201956:rs2477077;rs7534863:rs2201956;rs7534863:rs2477077;rs7534863:rs7534863:rs2477077;rs7534863:rs2477077:rs2477077	12
ENSG00000213047	DENND1B	1	197473878	197744826	-1	protein_coding	163486	DENND1B	0.636578	-0.145185	68	13.46	130	7.1675e-50	0	eQTLcatalogue/BLUEPRINT_ge_monocyte:eQTLcatalogue/Quach_2016_ge_monocyte_naive:PsychENCODE_eQTLs:eQTLGen_cis_eQTLs:BIOSQTL/BIOS_eQTL_geneLevel:CMC_SVA_cis:CMC_NoSVA_cis:GTEx/v8/Adipose_Subcutaneous:GTEx/v8/Adipose_Visceral_Omentum:GTEx/v8/Whole_Blood:GTEx/v8/Artery_Tibial:GTEx/v8/Brain_Cerebellum:GTEx/v8/Breast_Mammary_Tissue:GTEx/v8/Esophagus_Gastroesophageal_Junction:GTEx/v8/Esophagus_Mucosa:GT…	NA	Yes	Aorta:Left_Ventricle:Liver:GM12878:IMR90:Mesenchymal_Stem_Cell:Mesendoderm:Neural_Progenitor_Cell:Trophoblast-like_Cell:hESC	3.365e-15	rs2477077;rs7534863;rs2201956;rs35207123;rs7534863:rs7534863:rs2477077;rs7534863:rs2477077;rs7534863:rs2477077:rs2201956:rs2201956;rs35207123:rs2477077;rs2201956:rs2477077;rs2201956:rs35207123:rs35207123;rs7534863:rs35207123	12
ENSG00000203724	C1orf53	1	197871777	197876497	1	protein_coding	388722	C1orf53	0.104699	NA	6	10.22	4	0.000170354	1.86876e-11	GTEx/v8/Muscle_Skeletal	NA	Yes	Aorta:Left_Ventricle:Liver:GM12878:IMR90:Mesenchymal_Stem_Cell:Mesendoderm:Neural_Progenitor_Cell:Trophoblast-like_Cell:hESC	3.365e-15	rs2201956;rs35207123;rs7534863;rs2477077;rs7534863:rs2477077;rs7534863:rs2201956;rs35207123:rs7534863:rs2477077:rs2201956:rs2477077	12
ENSG00000143355	LHX9	1	197881037	197904608	1	protein_coding	56956	LHX9	0.941758	-1.0637	0	0	19	4.3768e-06	0.00168197	GTEx/v8/Nerve_Tibial:GTEx/v8/Testis	NA	Yes	Fetal_Cortex:GM12878:IMR90:Mesenchymal_Stem_Cell:Mesendoderm:Neural_Progenitor_Cell:Trophoblast-like_Cell:hESC	4.536e-15	rs2201956;rs35207123;rs7534863;rs2477077:rs2201956:rs35207123;rs7534863:rs35207123:rs2477077;rs7534863:rs2477077;rs7534863:rs2201956;rs35207123:rs7534863:rs2477077	12
ENSG00000151414	NEK7	1	198126093	198291550	1	protein_coding	140609	NEK7	0.707658	-0.580228	0	0	1	4.41575e-06	0.0315861	GTEx/v6/Stomach	NA	Yes	Fetal_Cortex:Aorta:Left_Ventricle:Liver:GM12878:IMR90:Mesenchymal_Stem_Cell:Mesendoderm:Neural_Progenitor_Cell:Trophoblast-like_Cell:hESC	3.365e-15	rs2477077;rs7534863;rs2201956:rs35207123;rs7534863:rs35207123:rs2477077;rs35207123;rs7534863:rs2477077;rs2201956;rs7534863:rs2201956;rs35207123:rs7534863:rs2477077:rs2477077;rs2201956:rs2477077	12
ENSG00000117322	CR2	1	207627575	207663240	1	protein_coding	1380	CR2	2.1654e-11	-0.533724	0	0	3	8.8566e-13	0	eQTLGen_trans_eQTLs	NA	No	NA	1.391e-05	rs9074;rs13054099;rs5751069	107:109
ENSG00000196482	ESRRG	1	216676588	217311097	-1	protein_coding	2104	ESRRG	0.936611	-1.12424	12	16.28	0	NA	NA	NA	NA	Yes	IMR90:Mesenchymal_Stem_Cell:Mesendoderm:Trophoblast-like_Cell:hESC	3.601e-08	rs10863277	13
ENSG00000197520	FAM177B	1	222910549	222924147	1	protein_coding	400823	FAM177B	9.2096e-06	-0.425514	0	0	2	1.6621e-09	5.70125e-05	eQTLGen_trans_eQTLs	NA	No	NA	0.0007836	rs13054099;rs5751069	109
ENSG00000143819	EPHX1	1	225997794	226033260	1	protein_coding	2052	EPHX1	1.61894e-07	-0.178624	0	0	4	4.8976e-28	0	eQTLGen_trans_eQTLs	NA	No	NA	1.527e-07	rs13054099;rs5751069	109
ENSG00000196187	TMEM63A	1	226033237	226070069	-1	protein_coding	9725	TMEM63A	6.10814e-05	0.741069	0	0	2	3.5936e-06	0.0103561	eQTLGen_cis_eQTLs	NA	No	NA	NA	rs2377013	14
ENSG00000143811	PYCR2	1	226107578	226111978	-1	protein_coding	102466270	PYCR2	0.00506294	0.505781	0	0	6	3.3712e-06	0.009	eQTLGen_cis_eQTLs:CMC_SVA_cis	NA	No	NA	NA	rs2377013	14
ENSG00000163041	H3F3A	1	226249552	226259702	1	protein_coding	3021	H3F3A	0.692335	-0.816023	0	0	1	1.26658e-05	0.00135059	PsychENCODE_eQTLs	NA	No	NA	NA	rs2377013	14
ENSG00000182827	ACBD3	1	226332380	226374431	-1	protein_coding	64746	ACBD3	0.981823	-1.04695	0	0	1	6.545e-07	0.00204245	eQTLGen_cis_eQTLs	NA	Yes	Mesendoderm	0.01044	rs2377013	14
ENSG00000183814	LIN9	1	226418850	226497570	-1	protein_coding	286826	LIN9	0.999927	-0.241752	0	0	12	1.73565e-10	0.049	DICE/Monocyte_non_classical	NA	No	NA	7.776e-09	rs2377013	14
ENSG00000143799	PARP1	1	226548392	226595780	-1	protein_coding	142	PARP1	0.00699693	NA	27	10.25	25	3.27170000000001e-310	0	eQTLcatalogue/BLUEPRINT_ge_monocyte:eQTLcatalogue/BLUEPRINT_ge_T-cell:eQTLcatalogue/GENCORD_ge_T-cell:eQTLcatalogue/Lepik_2017_ge_blood:eQTLcatalogue/TwinsUK_ge_blood:eQTLcatalogue/TwinsUK_ge_LCL:PsychENCODE_eQTLs:DICE/T_CD4_naive:DICE/T_CD8_naive:DICE/Monocyte_non_classical:DICE/T_CD4_TH17:DICE/T_CD4_TH2:DICE/T_CD4_memory_TREG:DICE/T_CD4_naive_TREG:eQTLGen_cis_eQTLs:BIOSQTL/BIOS_eQTL_geneLevel:C…	NA	No	NA	7.776e-09	rs2377013	14
ENSG00000203685	C1orf95	1	226736501	226796915	1	protein_coding	375057	C1orf95	0.0920541	-0.707677	0	0	17	1.9526e-07	2.7959e-70	eQTLcatalogue/HipSci_ge_iPSC:PsychENCODE_eQTLs:CMC_SVA_cis:BRAINEAC/TCTX:GTEx/v8/Brain_Nucleus_accumbens_basal_ganglia:GTEx/v8/Nerve_Tibial	NA	Yes	Mesenchymal_Stem_Cell:Mesendoderm:hESC	7.776e-09	rs2377013	14
ENSG00000163050	ADCK3	1	227085237	227175246	1	protein_coding	56997	ADCK3	1.235e-05	0.831024	0	0	4	6.6134e-13	0	eQTLGen_cis_eQTLs	NA	Yes	Mesenchymal_Stem_Cell	7.776e-09	rs2377013	14
ENSG00000181218	HIST3H2A	1	228645065	228645560	-1	protein_coding	92815	HIST3H2A	0.484382	0.0460721	0	0	2	4.1882e-07	0.00376578	eQTLGen_trans_eQTLs	NA	No	NA	0.0007836	rs13054099;rs5751069	109
ENSG00000119280	C1orf198	1	230972865	231005335	-1	protein_coding	84886	C1orf198	0.0273753	0.0384408	0	0	1	4.424e-06	0.0297739	eQTLGen_trans_eQTLs	NA	No	NA	NA	rs13054099;rs5751069	109
ENSG00000117009	KMO	1	241695434	241758944	1	protein_coding	8564	KMO	0.000261679	0.205759	0	0	1	7.1741e-10	2.03625e-05	eQTLGen_trans_eQTLs	NA	No	NA	1.391e-05	rs9074	107
ENSG00000117020	AKT3	1	243651535	244014381	-1	protein_coding	10000	AKT3	0.999585	-1.49767	0	0	2	6.0779e-09	0.000135662	eQTLGen_trans_eQTLs	NA	No	NA	0.0007836	rs13054099;rs5751069	109
ENSG00000119771	KLHL29	2	23608088	23931481	1	protein_coding	114818	KLHL29	NA	-0.399832	0	0	16	2.41481e-05	0.0180259	GTEx/v8/Thyroid	NA	Yes	Left_Ventricle:Mesenchymal_Stem_Cell:Mesendoderm:Trophoblast-like_Cell:hESC	1.785e-09	rs13030499;rs12619197:rs12619197;rs10182358:rs10182358:rs12619197;rs10182358:rs12619197;rs13030499:rs13030499	15
ENSG00000028116	VRK2	2	58134786	58387055	1	protein_coding	101927261	VRK2	1.21621e-08	-0.188348	39	24.5	63	1.949e-45	0	eQTLcatalogue/Fairfax_2014_IFN24:eQTLGen_cis_eQTLs:BIOSQTL/BIOS_eQTL_geneLevel:GTEx/v8/Adipose_Subcutaneous:GTEx/v8/Artery_Tibial:GTEx/v8/Breast_Mammary_Tissue:GTEx/v8/Esophagus_Muscularis:GTEx/v8/Thyroid:GTEx/v7/Adipose_Subcutaneous:GTEx/v7/Esophagus_Muscularis:GTEx/v7/Testis	NA	Yes	Adult_Cortex:Fetal_Cortex:Aorta:Left_Ventricle:GM12878:IMR90:Mesenchymal_Stem_Cell:Mesendoderm:Trophoblast-like_Cell:hESC	4.329e-11	rs11682175	17
ENSG00000115392	FANCL	2	58386378	58468507	-1	protein_coding	55120	FANCL	2.0996e-08	NA	4	9.929	44	1.0422e-14	0	eQTLcatalogue/BLUEPRINT_ge_T-cell:PsychENCODE_eQTLs:eQTLGen_cis_eQTLs:BIOSQTL/BIOS_eQTL_geneLevel:CMC_SVA_cis:GTEx/v6/Testis	NA	Yes	IMR90:Mesenchymal_Stem_Cell:Mesendoderm:hESC	4.329e-11	rs11682175	17
ENSG00000119866	BCL11A	2	60678302	60780702	-1	protein_coding	53335	BCL11A	0.829	-2.0339	0	0	1	5.3288e-14	0	eQTLGen_trans_eQTLs	NA	Yes	Aorta:Hippocampus:Left_Ventricle:Liver:GM12878:IMR90:Mesenchymal_Stem_Cell:Mesendoderm:Neural_Progenitor_Cell:Trophoblast-like_Cell:hESC	4.329e-11	rs9074;rs11682175	0.782639
ENSG00000135945	REV1	2	100016938	100106497	-1	protein_coding	51455	REV1	0.997024	NA	0	0	4	6.6016e-31	0	eQTLGen_trans_eQTLs	NA	No	NA	1.527e-07	rs13054099;rs5751069	109
ENSG00000115607	IL18RAP	2	103035149	103069025	1	protein_coding	8807	IL18RAP	0.366507	0.797204	0	0	1	1.3539e-05	0.037839	eQTLGen_cis_eQTLs	NA	No	NA	0.008094	rs2678670	18
ENSG00000135953	MFSD9	2	103332299	103353347	-1	protein_coding	84804	MFSD9	7.7206e-06	1.80919	0	0	6	1.1809e-28	0	eQTLGen_cis_eQTLs:GTEx/v8/Whole_Blood	NA	Yes	Fetal_Cortex	0.0001428	rs2678670	18
ENSG00000198914	POU3F3	2	105471969	105476929	1	protein_coding	5455	POU3F3	NA	-1.31869	0	0	3	6.45356e-06	0.0111075	GTEx/v7/Skin_Sun_Exposed_Lower_leg	NA	Yes	Promoter_anchored_loops:Adult_Cortex:Fetal_Cortex:IMR90:Mesendoderm:Neural_Progenitor_Cell:Trophoblast-like_Cell:hESC	0.0003698	rs2678670;rs2678670:rs1837713	18
ENSG00000119147	C2orf40	2	106679702	106694615	1	protein_coding	84417	C2orf40	0.00167864	NA	0	0	1	2.9167e-06	0.0211709	eQTLGen_trans_eQTLs	NA	No	NA	0.02339	rs301806	1
ENSG00000168702	LRP1B	2	140988992	142889270	-1	protein_coding	53353	LRP1B	0.999999	-0.165251	8	8.978	0	NA	NA	NA	NA	Yes	Mesenchymal_Stem_Cell:Mesendoderm:Trophoblast-like_Cell:hESC	1.887e-08	rs6713237	19
ENSG00000184611	KCNH7	2	163227917	163695240	-1	protein_coding	90134	KCNH7	0.984446	NA	0	0	1	7.577e-06	0.0463408	eQTLGen_trans_eQTLs	NA	No	NA	5.295e-07	rs35905305	81
ENSG00000082438	COBLL1	2	165510134	165700189	-1	protein_coding	22837	COBLL1	0.0121974	0.157057	0	0	1	1.2393e-07	0.00133991	eQTLGen_trans_eQTLs	NA	No	NA	1.391e-05	rs9074	107
ENSG00000169507	SLC38A11	2	165752696	165812035	-1	protein_coding	151258	SLC38A11	1.92551e-06	-0.552928	0	0	1	5.3532e-25	0	eQTLGen_trans_eQTLs	NA	No	NA	1.391e-05	rs9074	107
ENSG00000172845	SP3	2	174771187	174830430	-1	protein_coding	6670	SP3	0.992298	-0.491492	0	0	2	NA	0.049	CMC_SVA_cis	NA	Yes	Promoter_anchored_loops:EP_correlation_cell_type_oneway:IMR90	NA	rs6715304	20
ENSG00000138430	OLA1	2	174937175	175113426	-1	protein_coding	29789	OLA1	0.0436207	0.562368	1	4.011	21	8.74037e-11	0.000158288	BIOSQTL/BIOS_eQTL_geneLevel:xQTLServer_eQTLs:CMC_SVA_cis:CMC_NoSVA_cis:BRAINEAC/CRBL:BRAINEAC/FCTX:BRAINEAC/HIPP:BRAINEAC/TCTX:BRAINEAC/THAL:BRAINEAC/aveALL:GTEx/v8/Whole_Blood	NA	Yes	Fetal_Cortex:Left_Ventricle:IMR90:Mesenchymal_Stem_Cell:Mesendoderm:Trophoblast-like_Cell:hESC	5.792e-10	rs6715304	20
ENSG00000217236	SP9	2	175199674	175203220	1	protein_coding	100131390	SP9	0.498148	NA	13	21.8	0	NA	NA	NA	NA	Yes	IMR90:Mesenchymal_Stem_Cell:Mesendoderm:Trophoblast-like_Cell:hESC	9.725e-09	rs6715304	20
ENSG00000268241	AC018470.1	2	175200601	175202151	-1	protein_coding	NA	NA	NA	NA	10	21.8	0	NA	NA	NA	NA	Yes	IMR90:Mesenchymal_Stem_Cell:Mesendoderm:Trophoblast-like_Cell:hESC	9.725e-09	rs6715304	20
ENSG00000138433	CIR1	2	175212750	175260443	-1	protein_coding	9541	CIR1	0.0121191	0.0615639	36	16.4	28	4.9195e-113	0	eQTLcatalogue/Lepik_2017_ge_blood:eQTLGen_cis_eQTLs:BIOSQTL/BIOS_eQTL_geneLevel:GTEx/v8/Adipose_Subcutaneous:GTEx/v8/Whole_Blood:GTEx/v8/Esophagus_Muscularis:GTEx/v8/Nerve_Tibial:GTEx/v8/Stomach:GTEx/v8/Thyroid:GTEx/v7/Nerve_Tibial:GTEx/v7/Stomach:GTEx/v7/Thyroid	NA	Yes	Adult_Cortex:IMR90:Mesenchymal_Stem_Cell:Mesendoderm:hESC	5.792e-10	rs6715304	20
ENSG00000144306	SCRN3	2	175260458	175294303	1	protein_coding	79634	SCRN3	1.32015e-06	0.55798	6	19.85	34	4.579e-18	0	TIGER/Nom_Alonso_Pancreatic_islets:EyeGEx:PsychENCODE_eQTLs:eQTLGen_cis_eQTLs:BIOSQTL/BIOS_eQTL_geneLevel:xQTLServer_eQTLs:CMC_SVA_cis:CMC_NoSVA_cis:GTEx/v8/Adipose_Visceral_Omentum:GTEx/v8/Adrenal_Gland:GTEx/v8/Whole_Blood:GTEx/v8/Esophagus_Mucosa:GTEx/v8/Esophagus_Muscularis:GTEx/v8/Liver:GTEx/v8/Nerve_Tibial:GTEx/v8/Prostate:GTEx/v8/Cells_Cultured_fibroblasts:GTEx/v8/Stomach:GTEx/v8/Testis:GTE…	NA	Yes	Adult_Cortex:IMR90:Mesenchymal_Stem_Cell:Mesendoderm:hESC	5.792e-10	rs6715304	20
ENSG00000163328	GPR155	2	175296966	175351822	-1	protein_coding	151556	GPR155	8.12952e-11	0.160785	6	15.45	36	1.6343e-40	0	EyeGEx:eQTLcatalogue/GENCORD_ge_fibroblast:eQTLcatalogue/TwinsUK_ge_fat:PsychENCODE_eQTLs:DICE/B_cell_naive:DICE/T_CD4_memory_TREG:eQTLGen_cis_eQTLs:BIOSQTL/BIOS_eQTL_geneLevel:xQTLServer_eQTLs:CMC_SVA_cis:GTEx/v8/Artery_Tibial:GTEx/v8/Colon_Sigmoid:GTEx/v8/Heart_Left_Ventricle:GTEx/v8/Muscle_Skeletal:GTEx/v8/Pancreas:GTEx/v8/Thyroid:GTEx/v7/Muscle_Skeletal:GTEx/v7/Thyroid:GTEx/v6/Artery_Tibial:G…	NA	Yes	Adult_Cortex:IMR90:Mesenchymal_Stem_Cell:Mesendoderm	5.792e-10	rs6715304	20
ENSG00000115935	WIPF1	2	175424300	175547644	-1	protein_coding	7456	WIPF1	0.944314	1.20472	0	0	6	9.05698e-10	7.77625e-07	PsychENCODE_eQTLs:BIOSQTL/BIOS_eQTL_geneLevel:CMC_SVA_cis:GTEx/v8/Adipose_Visceral_Omentum:GTEx/v8/Esophagus_Mucosa:GTEx/v8/Skin_Sun_Exposed_Lower_leg	NA	Yes	Left_Ventricle:Spleen:GM12878:IMR90:Mesenchymal_Stem_Cell:Mesendoderm:Trophoblast-like_Cell:hESC	8.832e-06	rs6715304	20
ENSG00000138435	CHRNA1	2	175612320	175629200	-1	protein_coding	1134	CHRNA1	8.79557e-06	-0.0473612	0	0	3	4.76524e-06	0.00146578	GTEx/v7/Skin_Sun_Exposed_Lower_leg	NA	Yes	Left_Ventricle:Liver:Right_Ventricle:IMR90:Mesenchymal_Stem_Cell:Mesendoderm:Trophoblast-like_Cell:hESC	NA	rs6715304	20
ENSG00000128656	CHN1	2	175664091	175870097	-1	protein_coding	1123	CHN1	0.837424	NA	6	6.11	5	1.0005e-28	0	eQTLGen_cis_eQTLs:eQTLGen_trans_eQTLs	NA	Yes	Promoter_anchored_loops:Adult_Cortex:Fetal_Cortex:Left_Ventricle:Liver:IMR90:Mesenchymal_Stem_Cell:Mesendoderm:Neural_Progenitor_Cell:Trophoblast-like_Cell:hESC	1.527e-07	rs6715304;rs13054099;rs5751069	0.909028
ENSG00000154518	ATP5G3	2	176040986	176049335	-1	protein_coding	518	ATP5G3	0.538093	2.39244	0	0	11	1.20236e-06	1.91673e-48	CMC_SVA_cis:GTEx/v8/Adipose_Subcutaneous:GTEx/v8/Muscle_Skeletal:GTEx/v8/Testis:GTEx/v7/Heart_Left_Ventricle	NA	Yes	hESC	6.876e-08	rs6715304	20
ENSG00000128641	MYO1B	2	192109911	192290115	1	protein_coding	4430	MYO1B	0.878004	-0.605345	0	0	1	3.5453e-06	0.0249646	eQTLGen_trans_eQTLs	NA	No	NA	1.391e-05	rs9074	107
ENSG00000118263	KLF7	2	207938861	208031991	-1	protein_coding	8609	KLF7	0.929931	-2.11539	18	14.51	53	6.2435e-26	0	EyeGEx:DICE/B_cell_naive:DICE/Monocyte_non_classical:DICE/NK:eQTLGen_cis_eQTLs:BIOSQTL/BIOS_eQTL_geneLevel:GTEx/v8/Muscle_Skeletal:GTEx/v8/Testis:GTEx/v8/Thyroid:GTEx/v7/Testis:GTEx/v7/Thyroid:GTEx/v6/Testis	NA	Yes	Promoter_anchored_loops:EP_correlation_organ_oneway:Adult_Cortex:Fetal_Cortex:Left_Ventricle:GM12878:IMR90:Mesenchymal_Stem_Cell:Mesendoderm:hESC	1.443e-10	rs6732156	21
ENSG00000144401	METTL21A	2	208445355	208490652	-1	protein_coding	151194	METTL21A	0.0521777	NA	0	0	42	2.4375e-20	0	eQTLGen_cis_eQTLs	NA	Yes	IMR90	1.443e-10	rs6732156	21
ENSG00000178385	PLEKHM3	2	208693027	208890284	-1	protein_coding	389072	PLEKHM3	0.766248	-0.304476	0	0	1	6.62177e-05	0.049	DICE/T_CD4_TH2	NA	Yes	Left_Ventricle:IMR90	4.413e-10	rs6732156	21
ENSG00000115468	EFHD1	2	233470767	233547491	1	protein_coding	80303	EFHD1	0.770006	0.0276642	3	2.098	52	3.67107e-05	0.009	EyeGEx:CMC_SVA_cis	NA	Yes	Promoter_anchored_loops:IMR90:Mesenchymal_Stem_Cell:Mesendoderm	1.947e-08	rs283468	22
ENSG00000204120	GIGYF2	2	233562009	233725285	1	protein_coding	26058	GIGYF2	1	-0.484434	99	19.97	113	3.79409e-18	0	eQTLcatalogue/Alasoo_2018_ge_macrophage_IFNg_Salmonella:eQTLcatalogue/TwinsUK_ge_fat:PsychENCODE_eQTLs:eQTLGen_cis_eQTLs:BIOSQTL/BIOS_eQTL_geneLevel:CMC_SVA_cis:GTEx/v8/Adipose_Subcutaneous:GTEx/v8/Artery_Aorta:GTEx/v8/Artery_Tibial:GTEx/v8/Brain_Frontal_Cortex_BA9:GTEx/v8/Esophagus_Mucosa:GTEx/v8/Esophagus_Muscularis:GTEx/v8/Liver:GTEx/v8/Muscle_Skeletal:GTEx/v8/Nerve_Tibial:GTEx/v8/Cells_Cultur…	NA	Yes	Adult_Cortex:GM12878:IMR90:Mesenchymal_Stem_Cell:Mesendoderm:Trophoblast-like_Cell:hESC	1.947e-08	rs283468	22
ENSG00000115474	KCNJ13	2	233631174	233641278	-1	protein_coding	3769	KCNJ13	0.758052	-0.762971	25	13.84	109	2.33032e-15	1.16516e-11	TIGER/Nom_Alonso_Pancreatic_islets:eQTLcatalogue/CEDAR_ileum:GTEx/v8/Skin_Not_Sun_Exposed_Suprapubic:GTEx/v8/Small_Intestine_Terminal_Ileum:GTEx/v8/Testis:GTEx/v8/Thyroid:GTEx/v7/Skin_Not_Sun_Exposed_Suprapubic:GTEx/v7/Small_Intestine_Terminal_Ileum:GTEx/v7/Thyroid	NA	Yes	Liver:IMR90:Mesenchymal_Stem_Cell:Mesendoderm:hESC	1.947e-08	rs283468	22
ENSG00000182600	C2orf82	2	233721980	233743418	1	protein_coding	389084	C2orf82	0.466831	-0.411154	25	9.374	123	0	0	EyeGEx:eQTLcatalogue/BrainSeq_ge_brain:eQTLcatalogue/TwinsUK_ge_skin:PsychENCODE_eQTLs:eQTLGen_cis_eQTLs:BIOSQTL/BIOS_eQTL_geneLevel:xQTLServer_eQTLs:CMC_SVA_cis:CMC_NoSVA_cis:BRAINEAC/FCTX:BRAINEAC/HIPP:BRAINEAC/MEDU:BRAINEAC/OCTX:BRAINEAC/PUTM:BRAINEAC/SNIG:BRAINEAC/TCTX:BRAINEAC/THAL:BRAINEAC/WHMT:BRAINEAC/aveALL:GTEx/v8/Brain_Amygdala:GTEx/v8/Brain_Anterior_cingulate_cortex_BA24:GTEx/v8/Brain…	NA	Yes	IMR90	1.947e-08	rs283468	22
ENSG00000066248	NGEF	2	233743396	233877982	-1	protein_coding	25791	NGEF	0.949826	1.13119	32	8.122	108	7.91076e-30	0	EyeGEx:eQTLcatalogue/CEDAR_ileum:eQTLcatalogue/CEDAR_rectum:eQTLcatalogue/CEDAR_transverse_colon:eQTLcatalogue/TwinsUK_ge_skin:PsychENCODE_eQTLs:BIOSQTL/BIOS_eQTL_geneLevel:GTEx/v8/Adipose_Subcutaneous:GTEx/v8/Adipose_Visceral_Omentum:GTEx/v8/Adrenal_Gland:GTEx/v8/Artery_Aorta:GTEx/v8/Artery_Coronary:GTEx/v8/Artery_Tibial:GTEx/v8/Breast_Mammary_Tissue:GTEx/v8/Colon_Sigmoid:GTEx/v8/Colon_Transvers…	NA	Yes	Adult_Cortex:Liver:IMR90:Mesenchymal_Stem_Cell:Mesendoderm:Trophoblast-like_Cell:hESC	1.947e-08	rs283468	22
ENSG00000085982	USP40	2	234384166	234475428	-1	protein_coding	55230	USP40	1.74475e-14	1.85533	0	0	31	6.5195e-06	0.0186209	eQTLGen_cis_eQTLs	NA	No	NA	2.609e-08	rs283468	22
ENSG00000131370	SH3BP5	3	15296360	15382875	-1	protein_coding	9467	SH3BP5	0.00902325	-0.325778	0	0	1	3.8063e-07	0.00340421	eQTLGen_trans_eQTLs	NA	No	NA	0.03871	rs13054099	109
ENSG00000114812	VIPR1	3	42530791	42579059	1	protein_coding	7433	VIPR1	8.27528e-10	0.910227	0	0	6	4.838e-24	0	eQTLGen_cis_eQTLs	NA	Yes	Fetal_Cortex	4.476e-07	rs114990157;rs530758485	23
ENSG00000093183	SEC22C	3	42589461	42642572	-1	protein_coding	9117	SEC22C	1.72381e-06	-0.374875	0	0	3	3.40668e-06	1.71661e-09	GTEx/v8/Testis:GTEx/v7/Thyroid	NA	Yes	IMR90:Mesendoderm:Trophoblast-like_Cell:hESC	3.468e-09	rs199839695;rs530758485;rs114990157;rs114990157:rs13058913	23
ENSG00000114857	NKTR	3	42642106	42690227	1	protein_coding	4820	NKTR	0.991878	-0.775756	0	0	6	2.7557e-27	0	eQTLGen_cis_eQTLs	NA	Yes	IMR90:Mesendoderm:Trophoblast-like_Cell:hESC	3.468e-09	rs114990157;rs530758485;rs114990157:rs13058913	23
ENSG00000181061	HIGD1A	3	42798669	42846023	-1	protein_coding	25994	HIGD1A	0.450481	-0.46356	1	0.42	9	9.50392e-10	1.91148e-06	GTEx/v8/Cells_Cultured_fibroblasts	NA	Yes	Adult_Cortex:Fetal_Cortex	NA	rs114990157;rs199839695	23
ENSG00000144648	ACKR2	3	42846244	42929466	1	protein_coding	1238	ACKR2	0.00037689	0.368981	3	8.747	1	2.59347e-05	0.00106062	GTEx/v7/Pituitary	NA	Yes	Adult_Cortex:Fetal_Cortex	NA	rs185446477;rs199839695;rs114990157	23
ENSG00000273291	KRBOX1	3	42850938	43097363	1	protein_coding	NA	NA	NA	-1.19474	15	13.06	0	NA	NA	NA	NA	Yes	Promoter_anchored_loops	0.000816	rs185446477;rs114990157;rs530758485;rs199839695:rs199839695	23
ENSG00000240747	KRBOX1	3	42850975	42984284	1	protein_coding	100506243	KRBOX1	0.416824	-1.19474	6	13.06	0	NA	NA	NA	NA	Yes	Promoter_anchored_loops	0.02247	rs185446477;rs114990157;rs530758485;rs199839695:rs199839695	23
ENSG00000180432	CYP8B1	3	42897497	42917633	-1	protein_coding	1582	CYP8B1	0.000512932	0.127627	3	8.747	1	0.0001088	0.00877419	TIGER/Nom_Alonso_Pancreatic_islets	NA	No	NA	NA	rs185446477;rs114990157	23
ENSG00000182983	ZNF662	3	42947223	42960825	1	protein_coding	389114	ZNF662	3.71817e-10	-0.481976	1	8.336	0	NA	NA	NA	NA	Yes	Left_Ventricle:Liver:IMR90:Mesenchymal_Stem_Cell:Mesendoderm	3.164e-11	rs114990157;rs13058913:rs199839695:rs185446477:rs114990157:rs530758485;rs114990157:rs530758485	23
ENSG00000144649	FAM198A	3	43020759	43101703	1	protein_coding	729085	FAM198A	NA	0.530081	9	6.159	1	3.51317e-05	0.0448471	GTEx/v8/Stomach	NA	Yes	EP_correlation_cell_type_oneway:Fetal_Cortex:Left_Ventricle:Spleen:IMR90:Mesenchymal_Stem_Cell:Mesendoderm:hESC	5.638e-13	rs114990157;rs185446477;rs199839695;rs199839695:rs530758485;rs199839695:rs185446477:rs530758485;rs114990157:rs114990157:rs13058913:rs530758485	23
ENSG00000144647	POMGNT2	3	43120724	43147568	-1	protein_coding	84892	POMGNT2	0.00772677	NA	3	25	0	NA	NA	NA	NA	Yes	Left_Ventricle:IMR90:Mesenchymal_Stem_Cell:Mesendoderm:hESC	3.164e-11	rs185446477;rs199839695:rs185446477:rs13058913:rs530758485:rs114990157:rs530758485;rs114990157:rs530758485;rs199839695	23
ENSG00000163788	SNRK	3	43328004	43466256	1	protein_coding	54861	SNRK	0.994142	-0.871947	59	13.39	65	7.6659e-13	0	EyeGEx:PsychENCODE_eQTLs:eQTLGen_cis_eQTLs:BIOSQTL/BIOS_eQTL_geneLevel:GTEx/v8/Brain_Cerebellar_Hemisphere:GTEx/v8/Brain_Cerebellum:GTEx/v8/Skin_Not_Sun_Exposed_Suprapubic:GTEx/v8/Skin_Sun_Exposed_Lower_leg:GTEx/v7/Brain_Cerebellar_Hemisphere:GTEx/v7/Brain_Cerebellum:GTEx/v7/Skin_Sun_Exposed_Lower_leg:GTEx/v6/Brain_Cerebellum	NA	Yes	Promoter_anchored_loops:Adult_Cortex:Fetal_Cortex:Aorta:Left_Ventricle:Liver:Lung:Pancreas:Right_Ventricle:GM12878:IMR90:Mesenchymal_Stem_Cell:Mesendoderm:Trophoblast-like_Cell:hESC	3.164e-11	rs199839695;rs530758485;rs114990157;rs185446477;rs199839695:rs530758485;rs114990157:rs185446477:rs114990157:rs530758485:rs13058913	23
ENSG00000160746	ANO10	3	43396351	43733086	-1	protein_coding	55129	ANO10	1.9226e-06	0.104488	93	15.08	77	8.2349e-12	0	eQTLcatalogue/BLUEPRINT_ge_neutrophil:eQTLcatalogue/CEDAR_monocyte_CD14:eQTLcatalogue/CEDAR_neutrophil_CD15:eQTLcatalogue/Kasela_2017_T-cell_CD8:eQTLcatalogue/Quach_2016_ge_monocyte_Pam3CSK4:PsychENCODE_eQTLs:eQTLGen_cis_eQTLs:BIOSQTL/BIOS_eQTL_geneLevel:CMC_SVA_cis:CMC_NoSVA_cis:GTEx/v8/Adipose_Subcutaneous:GTEx/v8/Whole_Blood:GTEx/v8/Muscle_Skeletal:GTEx/v8/Nerve_Tibial:GTEx/v8/Skin_Sun_Exposed…	NA	Yes	Adult_Cortex:Fetal_Cortex:Left_Ventricle:IMR90:Mesenchymal_Stem_Cell:Mesendoderm:hESC	5.638e-13	rs199839695;rs530758485;rs185446477;rs114990157;rs13058913:rs530758485;rs114990157:rs185446477:rs199839695:rs530758485:rs114990157:rs530758485	23
ENSG00000011198	ABHD5	3	43731605	43775863	1	protein_coding	51099	ABHD5	3.45366e-05	0.638813	3	0.597	58	6.3297e-41	0	eQTLGen_cis_eQTLs:BIOSQTL/BIOS_eQTL_geneLevel:GTEx/v8/Esophagus_Muscularis:GTEx/v8/Muscle_Skeletal:GTEx/v8/Nerve_Tibial	NA	Yes	Adult_Cortex:Fetal_Cortex:Left_Ventricle:IMR90:Mesenchymal_Stem_Cell:Mesendoderm:hESC	5.638e-13	rs185446477;rs530758485;rs114990157;rs199839695;rs13058913:rs530758485;rs114990157:rs185446477:rs199839695:rs530758485:rs114990157:rs530758485	23
ENSG00000173769	TOPAZ1	3	44283378	44373590	1	protein_coding	375337	TOPAZ1	NA	-0.376317	39	9.072	109	6.78139e-17	2.94882e-14	PsychENCODE_eQTLs	NA	Yes	Aorta:Left_Ventricle:Liver:IMR90:Mesenchymal_Stem_Cell:Mesendoderm:Trophoblast-like_Cell:hESC	5.638e-13	rs13058913;rs199839695:rs185446477:rs114990157:rs530758485;rs114990157:rs530758485:rs13058913:rs530758485;rs199839695	23
ENSG00000179152	TCAIM	3	44379611	44450943	1	protein_coding	285343	TCAIM	4.45859e-05	0.313154	29	12.09	268	4.33781e-14	2.31766e-16	TIGER/Nom_Alonso_Pancreatic_islets:EyeGEx:eQTLcatalogue/BLUEPRINT_ge_neutrophil:eQTLcatalogue/BrainSeq_ge_brain:eQTLcatalogue/CEDAR_T-cell_CD4:eQTLcatalogue/HipSci_ge_iPSC:PsychENCODE_eQTLs:BIOSQTL/BIOS_eQTL_geneLevel:xQTLServer_eQTLs:CMC_SVA_cis:GTEx/v8/Adipose_Subcutaneous:GTEx/v8/Adipose_Visceral_Omentum:GTEx/v8/Whole_Blood:GTEx/v8/Artery_Aorta:GTEx/v8/Artery_Coronary:GTEx/v8/Artery_Tibial:GTE…	NA	Yes	Promoter_anchored_loops:Adult_Cortex:Fetal_Cortex:Aorta:Left_Ventricle:Liver:Spleen:GM12878:IMR90:Mesenchymal_Stem_Cell:Mesendoderm:Trophoblast-like_Cell:hESC	5.638e-13	rs13058913;rs185446477;rs114990157;rs530758485;rs199839695:rs199839695:rs13058913:rs185446477:rs530758485;rs114990157:rs530758485:rs114990157	23
ENSG00000185219	ZNF445	3	44481262	44519162	-1	protein_coding	353274	ZNF445	0.996478	-1.77738	23	10.1	260	8.86069e-14	2.94076e-11	eQTLcatalogue/BLUEPRINT_ge_T-cell:PsychENCODE_eQTLs:eQTLGen_cis_eQTLs:CMC_SVA_cis:GTEx/v8/Brain_Nucleus_accumbens_basal_ganglia:GTEx/v8/Cells_Cultured_fibroblasts:GTEx/v7/Brain_Nucleus_accumbens_basal_ganglia	NA	Yes	Adult_Cortex:Fetal_Cortex:Left_Ventricle:Liver:IMR90:Mesenchymal_Stem_Cell:Mesendoderm:Trophoblast-like_Cell:hESC	3.468e-09	rs13058913;rs13058913:rs114990157:rs185446477	23
ENSG00000178917	ZNF852	3	44540462	44552128	-1	protein_coding	285346	ZNF852	6.5365e-09	NA	10	6.695	211	8.98678e-14	0	eQTLGen_cis_eQTLs:BIOSQTL/BIOS_eQTL_geneLevel:BRAINEAC/CRBL:BRAINEAC/FCTX:BRAINEAC/HIPP:BRAINEAC/OCTX:BRAINEAC/aveALL:GTEx/v8/Adipose_Visceral_Omentum:GTEx/v8/Esophagus_Mucosa:GTEx/v8/Cells_Cultured_fibroblasts:GTEx/v8/Thyroid	NA	Yes	Promoter_anchored_loops:Mesenchymal_Stem_Cell	3.468e-09	rs185446477;rs13058913;rs530758485:rs199839695:rs13058913:rs185446477	23
ENSG00000196345	ZKSCAN7	3	44596685	44624975	1	protein_coding	55888	ZKSCAN7	1.17628e-05	-0.800781	58	16.88	286	6.2618e-70	0	TIGER/Nom_Alonso_Pancreatic_islets:EyeGEx:eQTLcatalogue/BLUEPRINT_ge_T-cell:eQTLcatalogue/BrainSeq_ge_brain:eQTLcatalogue/CEDAR_B-cell_CD19:eQTLcatalogue/GENCORD_ge_LCL:eQTLcatalogue/GENCORD_ge_T-cell:eQTLcatalogue/Lepik_2017_ge_blood:eQTLcatalogue/TwinsUK_ge_LCL:PsychENCODE_eQTLs:eQTLGen_cis_eQTLs:BIOSQTL/BIOS_eQTL_geneLevel:CMC_SVA_cis:CMC_NoSVA_cis:GTEx/v8/Adipose_Subcutaneous:GTEx/v8/Adipose_…	NA	Yes	Adult_Cortex:Fetal_Cortex:Aorta:Left_Ventricle:Liver:Spleen:GM12878:IMR90:Mesenchymal_Stem_Cell:Mesendoderm:Trophoblast-like_Cell:hESC	3.164e-11	rs13058913;rs199839695;rs530758485;rs114990157;rs13058913:rs185446477:rs199839695:rs530758485:rs114990157	23
ENSG00000273303	RP11-944L7.5	3	44607051	44635665	1	protein_coding	NA	NA	NA	NA	46	16.88	0	NA	NA	NA	NA	Yes	Promoter_anchored_loops:Adult_Cortex:Fetal_Cortex:GM12878:IMR90:Mesenchymal_Stem_Cell:Mesendoderm:Trophoblast-like_Cell:hESC	3.468e-09	rs13058913;rs13058913:rs185446477	23
ENSG00000144792	ZNF660	3	44619715	44641186	1	protein_coding	285349	ZNF660	0.0548051	-1.65843	38	16.88	295	4.10567e-27	0	EyeGEx:eQTLcatalogue/BrainSeq_ge_brain:eQTLcatalogue/TwinsUK_ge_fat:eQTLcatalogue/TwinsUK_ge_LCL:eQTLcatalogue/TwinsUK_ge_skin:PsychENCODE_eQTLs:DICE/B_cell_naive:DICE/T_CD4_naive:DICE/T_CD8_naive:DICE/T_CD8_naive_activated:DICE/T_CD4_TFH:DICE/T_CD4_TH2:eQTLGen_cis_eQTLs:BIOSQTL/BIOS_eQTL_geneLevel:CMC_SVA_cis:GTEx/v8/Adipose_Subcutaneous:GTEx/v8/Adipose_Visceral_Omentum:GTEx/v8/Adrenal_Gland:GTE…	NA	Yes	Promoter_anchored_loops:Adult_Cortex:Fetal_Cortex:GM12878:IMR90:Mesenchymal_Stem_Cell:Mesendoderm:Trophoblast-like_Cell:hESC	9.46e-10	rs13058913;rs13058913:rs199839695:rs530758485;rs199839695:rs530758485;rs114990157:rs185446477	23
ENSG00000186448	ZNF197	3	44626380	44689963	1	protein_coding	10168	ZNF197	5.95384e-14	0.135916	60	13.83	306	7.8648e-204	0	TIGER/Nom_Alonso_Pancreatic_islets:Nom_InsPIRE_Islets_Gene_eQTLs_Nominal_Pvalues:EyeGEx:eQTLcatalogue/Alasoo_2018_ge_macrophage_IFNg:eQTLcatalogue/Alasoo_2018_ge_macrophage_naive:eQTLcatalogue/BLUEPRINT_ge_monocyte:eQTLcatalogue/BLUEPRINT_ge_neutrophil:eQTLcatalogue/BLUEPRINT_ge_T-cell:eQTLcatalogue/CEDAR_neutrophil_CD15:eQTLcatalogue/Fairfax_2014_LPS24:eQTLcatalogue/GENCORD_ge_fibroblast:eQTLcat…	NA	Yes	Promoter_anchored_loops:Adult_Cortex:Fetal_Cortex:GM12878:IMR90:Mesenchymal_Stem_Cell:Mesendoderm:Trophoblast-like_Cell:hESC	9.46e-10	rs13058913;rs13058913:rs199839695:rs530758485;rs199839695:rs530758485;rs114990157:rs185446477	23
ENSG00000169981	ZNF35	3	44690219	44702283	1	protein_coding	7584	ZNF35	0.0792906	-0.732337	17	13.72	215	1.178e-14	0	eQTLcatalogue/Fairfax_2014_LPS2:PsychENCODE_eQTLs:eQTLGen_cis_eQTLs:BIOSQTL/BIOS_eQTL_geneLevel:CMC_SVA_cis:CMC_NoSVA_cis:GTEx/v8/Esophagus_Gastroesophageal_Junction:GTEx/v8/Testis	NA	Yes	Adult_Cortex:Fetal_Cortex:Aorta:Left_Ventricle:Liver:Spleen:GM12878:IMR90:Mesenchymal_Stem_Cell:Mesendoderm:Trophoblast-like_Cell:hESC	3.164e-11	rs13058913;rs13058913:rs185446477:rs199839695:rs530758485:rs114990157	23
ENSG00000196653	ZNF502	3	44754135	44765323	1	protein_coding	91392	ZNF502	1.40777e-05	0.252899	10	22.4	311	0	0	TIGER/Nom_Alonso_Pancreatic_islets:eQTLcatalogue/BLUEPRINT_ge_monocyte:eQTLcatalogue/BLUEPRINT_ge_T-cell:eQTLcatalogue/BrainSeq_ge_brain:eQTLcatalogue/CEDAR_T-cell_CD4:eQTLcatalogue/CEDAR_T-cell_CD8:eQTLcatalogue/Fairfax_2012_B-cell_CD19:eQTLcatalogue/Fairfax_2014_IFN24:eQTLcatalogue/Fairfax_2014_LPS2:eQTLcatalogue/GENCORD_ge_fibroblast:eQTLcatalogue/GENCORD_ge_LCL:eQTLcatalogue/GENCORD_ge_T-cell…	NA	Yes	Adult_Cortex:Fetal_Cortex:Left_Ventricle:Liver:GM12878:IMR90:Mesenchymal_Stem_Cell:Mesendoderm:Trophoblast-like_Cell:hESC	3.468e-09	rs13058913;rs114990157;rs13058913:rs185446477	23
ENSG00000186446	ZNF501	3	44771088	44778575	1	protein_coding	115560	ZNF501	0.00549806	-0.302345	10	22.4	284	8.2253e-58	0	TIGER/Nom_Alonso_Pancreatic_islets:eQTLcatalogue/BrainSeq_ge_brain:eQTLcatalogue/GEUVADIS_ge_LCL:eQTLcatalogue/Nedelec_2016_ge_macrophage_naive:eQTLcatalogue/Quach_2016_ge_monocyte_naive:PsychENCODE_eQTLs:DICE/B_cell_naive:DICE/T_CD4_naive_activated:eQTLGen_cis_eQTLs:BIOSQTL/BIOS_eQTL_geneLevel:CMC_SVA_cis:CMC_NoSVA_cis:GTEx/v8/Adipose_Subcutaneous:GTEx/v8/Adipose_Visceral_Omentum:GTEx/v8/Adrenal…	NA	Yes	Left_Ventricle:Liver:GM12878:IMR90:Mesenchymal_Stem_Cell:Mesendoderm:Trophoblast-like_Cell:hESC	3.468e-09	rs13058913;rs13058913:rs185446477	23
ENSG00000163807	KIAA1143	3	44779153	44803154	-1	protein_coding	57456	KIAA1143	0.0251025	-1.6464	13	13.69	312	3.5771e-219	0	EyeGEx:eQTLcatalogue/BLUEPRINT_ge_monocyte:eQTLcatalogue/BLUEPRINT_ge_T-cell:eQTLcatalogue/BrainSeq_ge_brain:eQTLcatalogue/Fairfax_2012_B-cell_CD19:eQTLcatalogue/Fairfax_2014_naive:eQTLcatalogue/GENCORD_ge_LCL:eQTLcatalogue/GENCORD_ge_T-cell:eQTLcatalogue/GEUVADIS_ge_LCL:eQTLcatalogue/HipSci_ge_iPSC:eQTLcatalogue/Lepik_2017_ge_blood:eQTLcatalogue/Quach_2016_ge_monocyte_IAV:eQTLcatalogue/Quach_201…	NA	Yes	Fetal_Cortex:IMR90:Mesenchymal_Stem_Cell	3.468e-09	rs13058913;rs185446477;rs114990157;rs13058913:rs185446477	23
ENSG00000163808	KIF15	3	44803209	44914868	1	protein_coding	56992	KIF15	7.4695e-13	-0.317071	43	10.59	60	7.59546e-07	2.00661e-06	EyeGEx:CMC_SVA_cis:GTEx/v8/Nerve_Tibial:GTEx/v8/Testis	NA	Yes	Fetal_Cortex:IMR90:Mesenchymal_Stem_Cell	5.514e-09	rs13058913;rs185446477;rs13058913:rs185446477	23
ENSG00000169964	TMEM42	3	44903361	44907162	1	protein_coding	131616	TMEM42	0.306978	-0.0389323	7	3.334	243	2.336e-41	0	eQTLcatalogue/Fairfax_2014_IFN24:eQTLGen_cis_eQTLs:BIOSQTL/BIOS_eQTL_geneLevel:GTEx/v8/Adipose_Subcutaneous:GTEx/v8/Adipose_Visceral_Omentum:GTEx/v8/Adrenal_Gland:GTEx/v8/Esophagus_Mucosa:GTEx/v8/Nerve_Tibial:GTEx/v8/Pancreas:GTEx/v8/Cells_Cultured_fibroblasts:GTEx/v8/Skin_Not_Sun_Exposed_Suprapubic:GTEx/v8/Skin_Sun_Exposed_Lower_leg:GTEx/v8/Stomach:GTEx/v8/Thyroid:GTEx/v7/Adrenal_Gland:GTEx/v7/N…	NA	Yes	Promoter_anchored_loops:Left_Ventricle:Spleen:IMR90:Mesenchymal_Stem_Cell:Mesendoderm	3.468e-09	rs13058913;rs13058913:rs185446477	23
ENSG00000163810	TGM4	3	44916100	44956482	1	protein_coding	7047	TGM4	1.13522e-11	0.329752	7	3.334	6	1.15183e-07	8.98856e-11	GTEx/v8/Skin_Sun_Exposed_Lower_leg:GTEx/v8/Testis:GTEx/v7/Skin_Sun_Exposed_Lower_leg	NA	Yes	Promoter_anchored_loops:Fetal_Cortex:Left_Ventricle:Spleen:IMR90:Mesenchymal_Stem_Cell:Mesendoderm	5.514e-09	rs13058913;rs185446477:rs13058913	23
ENSG00000163812	ZDHHC3	3	44956749	45017677	-1	protein_coding	51304	ZDHHC3	0.144015	-0.617523	1	4.687	16	7.7439e-14	0	TIGER/Nom_Alonso_Pancreatic_islets:eQTLcatalogue/Nedelec_2016_ge_macrophage_naive:eQTLGen_cis_eQTLs:BIOSQTL/BIOS_eQTL_geneLevel:GTEx/v8/Esophagus_Mucosa:GTEx/v8/Cells_Cultured_fibroblasts	NA	Yes	Adult_Cortex:Fetal_Cortex:GM12878:IMR90:Mesenchymal_Stem_Cell:Mesendoderm:Trophoblast-like_Cell:hESC	4.973e-09	rs13058913;rs13058913:rs185446477	23
ENSG00000075914	EXOSC7	3	45016733	45077558	1	protein_coding	23016	EXOSC7	0.0141395	NA	1	4.687	255	3.60927e-44	0	eQTLcatalogue/Fairfax_2012_B-cell_CD19:eQTLcatalogue/Fairfax_2014_IFN24:eQTLcatalogue/Fairfax_2014_LPS24:eQTLcatalogue/Fairfax_2014_naive:eQTLGen_cis_eQTLs:BIOSQTL/BIOS_eQTL_geneLevel:GTEx/v8/Esophagus_Mucosa:GTEx/v8/Nerve_Tibial:GTEx/v8/Cells_Cultured_fibroblasts:GTEx/v8/Testis:GTEx/v7/Esophagus_Mucosa:GTEx/v7/Testis	NA	Yes	Adult_Cortex:Fetal_Cortex:GM12878:IMR90:Mesenchymal_Stem_Cell:Mesendoderm:Trophoblast-like_Cell:hESC	3.468e-09	rs13058913;rs13058913:rs185446477	23
ENSG00000163815	CLEC3B	3	45043040	45077563	1	protein_coding	7123	CLEC3B	0.00038011	-0.0189533	0	0	207	3.1503e-90	0	eQTLGen_cis_eQTLs:BIOSQTL/BIOS_eQTL_geneLevel:GTEx/v8/Nerve_Tibial:GTEx/v8/Cells_Cultured_fibroblasts:GTEx/v7/Nerve_Tibial	NA	No	NA	3.468e-09	rs13058913	23
ENSG00000249992	TMEM158	3	45265958	45267770	-1	protein_coding	25907	TMEM158	0.382809	NA	0	0	11	3.8795e-10	0	eQTLGen_cis_eQTLs:GTEx/v7/Adipose_Visceral_Omentum	NA	No	NA	6.128e-07	rs13058913	23
ENSG00000164045	CDC25A	3	48198636	48229892	-1	protein_coding	993	CDC25A	0.979698	-0.724001	0	0	99	2.69711e-07	1.6423e-73	TIGER/Nom_Alonso_Pancreatic_islets:GTEx/v8/Adipose_Subcutaneous:GTEx/v8/Artery_Tibial:GTEx/v8/Brain_Cerebellar_Hemisphere:GTEx/v8/Muscle_Skeletal:GTEx/v8/Pancreas:GTEx/v8/Pituitary:GTEx/v8/Stomach:GTEx/v8/Thyroid:GTEx/v7/Adipose_Subcutaneous:GTEx/v7/Artery_Tibial:GTEx/v7/Muscle_Skeletal:GTEx/v6/Artery_Tibial:GTEx/v6/Skin_Sun_Exposed_Lower_leg	NA	Yes	Promoter_anchored_loops	1.244e-10	rs138653738;rs7617480;rs62262722;rs7617480:rs7617480	24
ENSG00000164048	ZNF589	3	48282590	48340743	1	protein_coding	51385	ZNF589	6.50061e-07	-0.372176	0	0	126	9.6354e-140	0	EyeGEx:eQTLcatalogue/Naranbhai_2015_neutrophil_CD16:eQTLGen_cis_eQTLs:GTEx/v8/Adipose_Subcutaneous:GTEx/v8/Adipose_Visceral_Omentum:GTEx/v8/Adrenal_Gland:GTEx/v8/Whole_Blood:GTEx/v8/Artery_Aorta:GTEx/v8/Artery_Tibial:GTEx/v8/Brain_Cerebellar_Hemisphere:GTEx/v8/Brain_Cortex:GTEx/v8/Brain_Spinal_cord_cervical_c-1:GTEx/v8/Breast_Mammary_Tissue:GTEx/v8/Esophagus_Gastroesophageal_Junction:GTEx/v8/Esop…	NA	Yes	Promoter_anchored_loops:Adult_Cortex:Fetal_Cortex:Liver:GM12878:IMR90:Mesenchymal_Stem_Cell	1.071e-12	rs7617480;rs138653738;rs62262722;rs138653738:rs7617480:rs7617480;rs62262722:rs62262722	24
ENSG00000172113	NME6	3	48334754	48343175	-1	protein_coding	10201	NME6	9.21636e-05	-0.182941	0	0	115	1.5631e-22	0	eQTLGen_cis_eQTLs:GTEx/v8/Adipose_Subcutaneous:GTEx/v8/Whole_Blood:GTEx/v8/Artery_Aorta:GTEx/v8/Esophagus_Mucosa:GTEx/v8/Esophagus_Muscularis:GTEx/v8/Muscle_Skeletal:GTEx/v8/Nerve_Tibial:GTEx/v8/Cells_Cultured_fibroblasts:GTEx/v8/Skin_Sun_Exposed_Lower_leg:GTEx/v8/Thyroid:GTEx/v7/Adipose_Subcutaneous:GTEx/v7/Esophagus_Muscularis:GTEx/v7/Heart_Left_Ventricle:GTEx/v7/Cells_Transformed_fibroblasts:G…	NA	Yes	Promoter_anchored_loops:Fetal_Cortex	1.071e-12	rs138653738;rs7617480;rs62262722;rs7617480:rs7617480;rs62262722:rs62262722:rs138653738	24
ENSG00000164049	FBXW12	3	48413709	48442666	1	protein_coding	285231	FBXW12	1.97458e-07	0.783335	0	0	16	0.000162296	2.97167e-11	GTEx/v8/Testis	NA	Yes	Promoter_anchored_loops	1.071e-12	rs7617480;rs62262722;rs7617480:rs138653738:rs7617480	24
ENSG00000164050	PLXNB1	3	48445261	48471594	-1	protein_coding	5364	PLXNB1	0.850195	NA	0	0	14	0.000228454	0.000576498	GTEx/v8/Esophagus_Mucosa:GTEx/v8/Muscle_Skeletal	NA	Yes	Adult_Cortex:Fetal_Cortex:IMR90	1.698e-07	rs7617480;rs62262722;rs7617480:rs62262722:rs138653738:rs7617480	24
ENSG00000232112	TMA7	3	48481667	48485616	1	protein_coding	51372	TMA7	0.0100073	0.321268	0	0	128	1.608e-16	0	EyeGEx:PsychENCODE_eQTLs:DICE/T_CD4_TH1_17:eQTLGen_cis_eQTLs:GTEx/v8/Brain_Cerebellar_Hemisphere:GTEx/v8/Brain_Cerebellum:GTEx/v8/Brain_Cortex:GTEx/v8/Heart_Left_Ventricle:GTEx/v8/Muscle_Skeletal:GTEx/v8/Skin_Sun_Exposed_Lower_leg:GTEx/v8/Testis:GTEx/v7/Brain_Cerebellum:GTEx/v7/Brain_Nucleus_accumbens_basal_ganglia:GTEx/v7/Heart_Atrial_Appendage:GTEx/v7/Heart_Left_Ventricle:GTEx/v7/Muscle_Skeleta…	NA	Yes	Promoter_anchored_loops:Adult_Cortex:Fetal_Cortex:Aorta:Left_Ventricle:Liver:GM12878:IMR90:Mesenchymal_Stem_Cell:Trophoblast-like_Cell	1.071e-12	rs62262722;rs7617480;rs138653738;rs7617480:rs62262722:rs7617480;rs62262722:rs138653738:rs138653738	24
ENSG00000164053	ATRIP	3	48488114	48507115	1	protein_coding	84126	ATRIP	0.00148698	NA	0	0	155	7.50297e-70	0	eQTLcatalogue/HipSci_ge_iPSC:eQTLGen_cis_eQTLs:BIOSQTL/BIOS_eQTL_geneLevel:GTEx/v8/Adipose_Visceral_Omentum:GTEx/v8/Whole_Blood:GTEx/v8/Artery_Tibial:GTEx/v8/Brain_Cerebellar_Hemisphere:GTEx/v8/Brain_Putamen_basal_ganglia:GTEx/v8/Esophagus_Gastroesophageal_Junction:GTEx/v8/Esophagus_Mucosa:GTEx/v8/Esophagus_Muscularis:GTEx/v8/Heart_Atrial_Appendage:GTEx/v8/Muscle_Skeletal:GTEx/v8/Nerve_Tibial:GTE…	NA	Yes	Promoter_anchored_loops:Adult_Cortex:Fetal_Cortex:Aorta:Left_Ventricle:Liver:GM12878:IMR90:Mesenchymal_Stem_Cell:Trophoblast-like_Cell	1.071e-12	rs138653738;rs7617480;rs62262722;rs7617480:rs62262722:rs7617480;rs62262722:rs138653738:rs138653738	24
ENSG00000213689	TREX1	3	48506445	48509044	1	protein_coding	84126	TREX1	0.0933407	-0.110328	0	0	167	1.1834e-98	0	PsychENCODE_eQTLs:eQTLGen_cis_eQTLs:BIOSQTL/BIOS_eQTL_geneLevel:xQTLServer_eQTLs:CMC_SVA_cis:CMC_NoSVA_cis:GTEx/v8/Adipose_Subcutaneous:GTEx/v8/Adipose_Visceral_Omentum:GTEx/v8/Whole_Blood:GTEx/v8/Artery_Aorta:GTEx/v8/Artery_Tibial:GTEx/v8/Brain_Caudate_basal_ganglia:GTEx/v8/Breast_Mammary_Tissue:GTEx/v8/Colon_Sigmoid:GTEx/v8/Colon_Transverse:GTEx/v8/Esophagus_Mucosa:GTEx/v8/Esophagus_Muscularis:…	NA	Yes	Promoter_anchored_loops:Fetal_Cortex:Aorta:Left_Ventricle:Liver:GM12878:IMR90:Mesenchymal_Stem_Cell:Trophoblast-like_Cell	1.071e-12	rs7617480;rs62262722;rs138653738;rs138653738:rs7617480:rs7617480;rs62262722:rs62262722	24
ENSG00000164054	SHISA5	3	48509197	48542259	-1	protein_coding	51246	SHISA5	9.94272e-08	-0.44203	0	0	167	4.84e-15	0	PsychENCODE_eQTLs:eQTLGen_cis_eQTLs:BIOSQTL/BIOS_eQTL_geneLevel:GTEx/v8/Esophagus_Mucosa:GTEx/v8/Lung:GTEx/v8/Muscle_Skeletal:GTEx/v8/Cells_Cultured_fibroblasts:GTEx/v8/Skin_Not_Sun_Exposed_Suprapubic:GTEx/v8/Skin_Sun_Exposed_Lower_leg:GTEx/v7/Brain_Hippocampus:GTEx/v7/Esophagus_Mucosa:GTEx/v7/Muscle_Skeletal:GTEx/v7/Cells_Transformed_fibroblasts	NA	Yes	Promoter_anchored_loops	1.071e-12	rs7617480;rs62262722;rs138653738;rs138653738:rs7617480	24
ENSG00000114268	PFKFB4	3	48555117	48599448	-1	protein_coding	5210	PFKFB4	0.000321134	-0.13132	1	2.09	0	NA	NA	NA	NA	Yes	Promoter_anchored_loops:GM12878:IMR90:Mesenchymal_Stem_Cell	8.513e-07	rs138653738;rs7617480:rs138653738	24
ENSG00000145040	UCN2	3	48599160	48601206	-1	protein_coding	90226	UCN2	0.157236	0.00632673	2	2.09	1	0.000686973	0.0428088	PsychENCODE_eQTLs	NA	Yes	Promoter_anchored_loops	8.513e-07	rs138653738;rs7617480;rs62262722;rs138653738:rs7617480	24
ENSG00000114270	COL7A1	3	48601506	48632700	-1	protein_coding	1294	COL7A1	2.10611e-18	NA	2	2.09	2	5.40917e-07	0.000447546	eQTLGen_cis_eQTLs:BIOSQTL/BIOS_eQTL_geneLevel	NA	Yes	Promoter_anchored_loops	0.04649	rs138653738;rs7617480;rs7617480:rs7617480;rs62262722	24
ENSG00000010256	UQCRC1	3	48636435	48648409	-1	protein_coding	7384	UQCRC1	0.132467	-0.703758	0	0	4	1.1567e-05	0.0325679	eQTLGen_cis_eQTLs:CMC_NoSVA_cis	NA	Yes	Promoter_anchored_loops:Adult_Cortex:IMR90	1.076e-08	rs7617480;rs138653738:rs7617480;rs62262722:rs7617480:rs62262722	24
ENSG00000183396	TMEM89	3	48658192	48659288	-1	protein_coding	440955	TMEM89	0.711076	-0.325142	0	0	31	2.22649e-05	3.40552e-24	GTEx/v8/Artery_Tibial:GTEx/v8/Prostate:GTEx/v7/Prostate	NA	Yes	Promoter_anchored_loops:IMR90	1.244e-10	rs7617480;rs62262722;rs7617480:rs7617480;rs62262722:rs138653738	24
ENSG00000225697	SLC26A6	3	48663156	48672926	-1	protein_coding	102465495	SLC26A6	3.31045e-05	-0.384056	0	0	53	3.7379e-33	0	eQTLcatalogue/Fairfax_2012_B-cell_CD19:eQTLcatalogue/GEUVADIS_ge_LCL:eQTLcatalogue/Quach_2016_ge_monocyte_IAV:eQTLcatalogue/Quach_2016_ge_monocyte_LPS:eQTLcatalogue/Quach_2016_ge_monocyte_naive:eQTLcatalogue/Quach_2016_ge_monocyte_Pam3CSK4:eQTLcatalogue/Quach_2016_ge_monocyte_R848:eQTLGen_cis_eQTLs:BIOSQTL/BIOS_eQTL_geneLevel:GTEx/v8/Adipose_Subcutaneous:GTEx/v8/Whole_Blood:GTEx/v8/Lung:GTEx/v8/M…	NA	Yes	Promoter_anchored_loops:Adult_Cortex:Fetal_Cortex:IMR90	1.698e-07	rs7617480;rs138653738:rs7617480:rs62262722	24
ENSG00000008300	CELSR3	3	48673902	48700348	-1	protein_coding	1951	CELSR3	0.999656	-0.878908	1	8.326	168	3.9073e-16	0	TIGER/Nom_Alonso_Pancreatic_islets:eQTLGen_cis_eQTLs:GTEx/v8/Adipose_Subcutaneous:GTEx/v8/Artery_Aorta:GTEx/v8/Artery_Tibial:GTEx/v8/Colon_Transverse:GTEx/v8/Muscle_Skeletal:GTEx/v7/Adipose_Subcutaneous:GTEx/v7/Artery_Tibial	NA	Yes	Promoter_anchored_loops:Adult_Cortex:Fetal_Cortex:IMR90	1.071e-12	rs138653738;rs7617480;rs62262722;rs138653738:rs7617480;rs62262722:rs7617480:rs62262722	24
ENSG00000213672	NCKIPSD	3	48701364	48723797	-1	protein_coding	51517	NCKIPSD	0.00713136	-0.551018	6	8.326	328	0	0	TIGER/Nom_Alonso_Pancreatic_islets:EyeGEx:eQTLcatalogue/Alasoo_2018_ge_macrophage_naive:eQTLcatalogue/BLUEPRINT_ge_monocyte:eQTLcatalogue/BLUEPRINT_ge_neutrophil:eQTLcatalogue/BLUEPRINT_ge_T-cell:eQTLcatalogue/BrainSeq_ge_brain:eQTLcatalogue/CEDAR_monocyte_CD14:eQTLcatalogue/CEDAR_platelet:eQTLcatalogue/CEDAR_T-cell_CD4:eQTLcatalogue/CEDAR_transverse_colon:eQTLcatalogue/Fairfax_2012_B-cell_CD19:e…	NA	Yes	Promoter_anchored_loops:Adult_Cortex:Fetal_Cortex:Left_Ventricle:GM12878:IMR90:Mesenchymal_Stem_Cell	1.071e-12	rs138653738;rs7617480;rs62262722;rs138653738:rs7617480:rs62262722:rs7617480;rs62262722:rs138653738	24
ENSG00000068745	IP6K2	3	48725436	48777786	-1	protein_coding	51447	IP6K2	0.989458	-0.392799	24	15.69	184	7.9067e-30	0	TIGER/Nom_Alonso_Pancreatic_islets:EyeGEx:eQTLcatalogue/BrainSeq_ge_brain:eQTLcatalogue/Fairfax_2012_B-cell_CD19:eQTLcatalogue/Lepik_2017_ge_blood:PsychENCODE_eQTLs:eQTLGen_cis_eQTLs:CMC_SVA_cis:GTEx/v8/Adipose_Subcutaneous:GTEx/v8/Adipose_Visceral_Omentum:GTEx/v8/Adrenal_Gland:GTEx/v8/Whole_Blood:GTEx/v8/Artery_Aorta:GTEx/v8/Artery_Tibial:GTEx/v8/Brain_Cerebellar_Hemisphere:GTEx/v8/Brain_Cerebel…	NA	Yes	Promoter_anchored_loops:IMR90:Mesenchymal_Stem_Cell	1.244e-10	rs7617480;rs138653738;rs62262722;rs62262722:rs7617480:rs138653738:rs62262722	24
ENSG00000114302	PRKAR2A	3	48782030	48885279	-1	protein_coding	5576	PRKAR2A	0.983251	-2.8684	46	12.63	232	1.1854e-13	0	TIGER/Nom_Alonso_Pancreatic_islets:eQTLcatalogue/BLUEPRINT_ge_neutrophil:eQTLcatalogue/GENCORD_ge_LCL:eQTLcatalogue/Quach_2016_ge_monocyte_naive:eQTLcatalogue/TwinsUK_ge_fat:PsychENCODE_eQTLs:eQTLGen_cis_eQTLs:BIOSQTL/BIOS_eQTL_geneLevel:CMC_SVA_cis:GTEx/v8/Adipose_Subcutaneous:GTEx/v8/Adipose_Visceral_Omentum:GTEx/v8/Artery_Tibial:GTEx/v8/Brain_Substantia_nigra:GTEx/v8/Breast_Mammary_Tissue:GTEx…	NA	Yes	Promoter_anchored_loops:Adult_Cortex:Fetal_Cortex:IMR90:Mesenchymal_Stem_Cell	1.071e-12	rs62262722;rs7617480;rs138653738;rs138653738:rs7617480:rs7617480;rs62262722:rs62262722	24
ENSG00000178537	SLC25A20	3	48894369	48936426	-1	protein_coding	788	SLC25A20	2.04567e-07	-0.773546	27	11.22	7	0.000117906	0.0352654	CMC_SVA_cis:GTEx/v8/Esophagus_Muscularis:GTEx/v7/Nerve_Tibial	NA	Yes	Promoter_anchored_loops:GM12878:IMR90:Mesenchymal_Stem_Cell	1.459e-08	rs7617480;rs62262722;rs138653738;rs7617480:rs7617480;rs62262722:rs138653738:rs62262722	24
ENSG00000221883	ARIH2OS	3	48955221	48956818	-1	protein_coding	646450	ARIH2OS	0.437613	-0.628346	7	6.206	2	2.77845e-05	0.049	DICE/T_CD8_naive_activated	NA	Yes	Adult_Cortex:Fetal_Cortex:GM12878:IMR90:Mesenchymal_Stem_Cell	4.044e-08	rs7617480;rs62262722;rs138653738;rs7617480:rs62262722:rs138653738:rs7617480	24
ENSG00000177479	ARIH2	3	48956254	49023815	1	protein_coding	10425	ARIH2	0.987412	-1.69992	30	9.491	328	1.59654e-134	0	EyeGEx:eQTLcatalogue/BLUEPRINT_ge_T-cell:eQTLcatalogue/Quach_2016_ge_monocyte_Pam3CSK4:eQTLcatalogue/TwinsUK_ge_fat:eQTLcatalogue/TwinsUK_ge_skin:PsychENCODE_eQTLs:DICE/B_cell_naive:DICE/T_CD4_naive:DICE/T_CD4_naive_activated:DICE/T_CD8_naive:DICE/T_CD8_naive_activated:DICE/Monocyte_non_classical:DICE/NK:DICE/T_CD4_TFH:DICE/T_CD4_TH17:DICE/T_CD4_TH1_17:DICE/T_CD4_TH2:DICE/T_CD4_memory_TREG:DICE/T…	NA	Yes	Adult_Cortex:Fetal_Cortex:GM12878:IMR90:Mesenchymal_Stem_Cell	1.071e-12	rs7617480;rs62262722;rs138653738;rs7617480:rs62262722:rs138653738:rs7617480	24
ENSG00000178467	P4HTM	3	49027319	49044587	1	protein_coding	54681	P4HTM	0.0232749	NA	6	13.56	403	7.5807e-256	0	TIGER/Nom_Alonso_Pancreatic_islets:Nom_InsPIRE_Islets_Gene_eQTLs_Nominal_Pvalues:EyeGEx:eQTLcatalogue/BrainSeq_ge_brain:eQTLcatalogue/CEDAR_ileum:eQTLcatalogue/CEDAR_neutrophil_CD15:eQTLcatalogue/CEDAR_T-cell_CD4:eQTLcatalogue/CEDAR_T-cell_CD8:eQTLcatalogue/Fairfax_2014_IFN24:eQTLcatalogue/Fairfax_2014_LPS24:eQTLcatalogue/Fairfax_2014_LPS2:eQTLcatalogue/Fairfax_2014_naive:eQTLcatalogue/GENCORD_ge…	NA	Yes	Promoter_anchored_loops:Adult_Cortex:GM12878:IMR90:Mesenchymal_Stem_Cell	1.071e-12	rs7617480;rs62262722;rs138653738;rs7617480:rs138653738:rs7617480;rs62262722:rs62262722	24
ENSG00000178252	WDR6	3	49044495	49053386	1	protein_coding	11180	WDR6	9.19648e-07	-0.0589495	8	15.78	441	0	0	TIGER/Nom_Alonso_Pancreatic_islets:eQTLcatalogue/Alasoo_2018_ge_macrophage_IFNg_Salmonella:eQTLcatalogue/Alasoo_2018_ge_macrophage_IFNg:eQTLcatalogue/Alasoo_2018_ge_macrophage_naive:eQTLcatalogue/Alasoo_2018_ge_macrophage_Salmonella:eQTLcatalogue/BLUEPRINT_ge_monocyte:eQTLcatalogue/BLUEPRINT_ge_neutrophil:eQTLcatalogue/BLUEPRINT_ge_T-cell:eQTLcatalogue/BrainSeq_ge_brain:eQTLcatalogue/CEDAR_ileum:…	NA	Yes	Adult_Cortex:Fetal_Cortex:IMR90:Mesenchymal_Stem_Cell	1.071e-12	rs7617480;rs62262722;rs138653738;rs7617480:rs138653738:rs7617480;rs62262722:rs62262722:rs138653738	24
ENSG00000178149	DALRD3	3	49052921	49059726	-1	protein_coding	55152	DALRD3	1.84814e-05	0.0723068	5	15.78	286	4.98481e-247	0	TIGER/Nom_Alonso_Pancreatic_islets:eQTLcatalogue/BLUEPRINT_ge_monocyte:eQTLcatalogue/GEUVADIS_ge_LCL:eQTLcatalogue/Lepik_2017_ge_blood:eQTLcatalogue/Nedelec_2016_ge_macrophage_Listeria:eQTLcatalogue/Quach_2016_ge_monocyte_naive:eQTLcatalogue/TwinsUK_ge_fat:eQTLcatalogue/TwinsUK_ge_skin:PsychENCODE_eQTLs:DICE/Monocyte_non_classical:eQTLGen_cis_eQTLs:BIOSQTL/BIOS_eQTL_geneLevel:CMC_SVA_cis:GTEx/v8/…	NA	Yes	Promoter_anchored_loops:Adult_Cortex:Fetal_Cortex:IMR90:Mesenchymal_Stem_Cell	1.071e-12	rs7617480;rs62262722;rs7617480:rs62262722:rs7617480;rs62262722:rs138653738	24
ENSG00000178057	NDUFAF3	3	49057892	49060928	1	protein_coding	25915	NDUFAF3	4.85973e-05	-2.09007	5	15.78	270	1.163e-41	0	EyeGEx:eQTLGen_cis_eQTLs:BIOSQTL/BIOS_eQTL_geneLevel:GTEx/v8/Adipose_Subcutaneous:GTEx/v8/Artery_Aorta:GTEx/v8/Artery_Tibial:GTEx/v8/Esophagus_Gastroesophageal_Junction:GTEx/v8/Esophagus_Muscularis:GTEx/v8/Heart_Atrial_Appendage:GTEx/v8/Heart_Left_Ventricle:GTEx/v8/Lung:GTEx/v8/Muscle_Skeletal:GTEx/v8/Nerve_Tibial:GTEx/v8/Cells_Cultured_fibroblasts:GTEx/v8/Skin_Not_Sun_Exposed_Suprapubic:GTEx/v8/…	NA	Yes	Promoter_anchored_loops:EP_correlation_cell_type_oneway:Adult_Cortex:Fetal_Cortex:IMR90:Mesenchymal_Stem_Cell	1.071e-12	rs7617480;rs62262722;rs7617480:rs62262722:rs7617480;rs62262722:rs138653738	24
ENSG00000178035	IMPDH2	3	49061758	49066841	-1	protein_coding	3615	IMPDH2	0.00135317	-0.509343	10	15.78	68	5.23037e-05	0.0116736	GTEx/v8/Cells_Cultured_fibroblasts	NA	Yes	Promoter_anchored_loops:IMR90:Mesenchymal_Stem_Cell	2.166e-10	rs7617480;rs62262722;rs138653738;rs7617480:rs138653738:rs7617480;rs62262722:rs62262722	24
ENSG00000198218	QRICH1	3	49067140	49131796	-1	protein_coding	54870	QRICH1	0.99607	-0.279294	35	12.78	372	7.0964e-186	0	EyeGEx:eQTLcatalogue/BLUEPRINT_ge_monocyte:eQTLcatalogue/CEDAR_T-cell_CD4:eQTLcatalogue/Fairfax_2012_B-cell_CD19:eQTLcatalogue/GEUVADIS_ge_LCL:eQTLcatalogue/Lepik_2017_ge_blood:eQTLcatalogue/Quach_2016_ge_monocyte_LPS:eQTLcatalogue/Quach_2016_ge_monocyte_naive:eQTLcatalogue/TwinsUK_ge_LCL:eQTLcatalogue/TwinsUK_ge_skin:PsychENCODE_eQTLs:DICE/T_CD4_naive_TREG:eQTLGen_cis_eQTLs:BIOSQTL/BIOS_eQTL_gen…	NA	Yes	Promoter_anchored_loops:Adult_Cortex:Fetal_Cortex:Left_Ventricle:GM12878:IMR90:Mesenchymal_Stem_Cell:Trophoblast-like_Cell:hESC	1.071e-12	rs7617480;rs62262722;rs138653738;rs62262722:rs7617480:rs138653738:rs62262722:rs138653738	24
ENSG00000172053	QARS	3	49133365	49142553	-1	protein_coding	102465536	QARS	8.7897e-08	-0.634756	11	12.85	5	1.81494e-05	0.00824869	GTEx/v7/Adipose_Subcutaneous:GTEx/v7/Pancreas	NA	Yes	Promoter_anchored_loops:Adult_Cortex:Fetal_Cortex:Left_Ventricle:GM12878:IMR90:Mesenchymal_Stem_Cell:Trophoblast-like_Cell:hESC	1.071e-12	rs138653738;rs62262722;rs7617480;rs138653738:rs62262722:rs7617480:rs7617480;rs62262722:rs138653738	24
ENSG00000172046	USP19	3	49145479	49158371	-1	protein_coding	10869	USP19	0.999992	-0.429633	10	32	26	2.0962e-07	0.000685914	eQTLGen_cis_eQTLs:GTEx/v8/Muscle_Skeletal:GTEx/v8/Testis:GTEx/v7/Muscle_Skeletal:GTEx/v7/Testis	NA	Yes	Promoter_anchored_loops:Adult_Cortex:Fetal_Cortex:Left_Ventricle:GM12878:IMR90:Mesenchymal_Stem_Cell:Trophoblast-like_Cell:hESC	1.352e-10	rs7617480;rs62262722;rs138653738;rs7617480:rs7617480;rs62262722:rs62262722:rs138653738:rs138653738	24
ENSG00000172037	LAMB2	3	49158547	49170551	-1	protein_coding	3913	LAMB2	7.45007e-11	-0.451082	10	32	188	2.3472e-35	0	eQTLGen_cis_eQTLs:BIOSQTL/BIOS_eQTL_geneLevel:GTEx/v8/Adipose_Subcutaneous:GTEx/v8/Adipose_Visceral_Omentum:GTEx/v8/Whole_Blood:GTEx/v8/Artery_Aorta:GTEx/v8/Artery_Tibial:GTEx/v8/Muscle_Skeletal:GTEx/v8/Cells_Cultured_fibroblasts:GTEx/v7/Artery_Tibial	NA	Yes	Promoter_anchored_loops:Adult_Cortex:Fetal_Cortex:IMR90	1.071e-12	rs7617480;rs138653738;rs62262722;rs138653738:rs7617480;rs62262722:rs7617480:rs62262722	24
ENSG00000177352	CCDC71	3	49199968	49203754	-1	protein_coding	64925	CCDC71	0.0169896	NA	7	15.13	246	4.7501e-45	0	eQTLcatalogue/BrainSeq_ge_brain:eQTLcatalogue/Fairfax_2014_LPS24:eQTLcatalogue/Fairfax_2014_LPS2:eQTLcatalogue/Quach_2016_ge_monocyte_Pam3CSK4:eQTLcatalogue/TwinsUK_ge_LCL:eQTLcatalogue/TwinsUK_ge_skin:PsychENCODE_eQTLs:eQTLGen_cis_eQTLs:BIOSQTL/BIOS_eQTL_geneLevel:GTEx/v8/Adipose_Subcutaneous:GTEx/v8/Whole_Blood:GTEx/v8/Brain_Amygdala:GTEx/v8/Brain_Caudate_basal_ganglia:GTEx/v8/Brain_Cerebellar_…	NA	Yes	Promoter_anchored_loops:Adult_Cortex:Fetal_Cortex:IMR90	1.071e-12	rs138653738;rs7617480;rs62262722;rs138653738:rs7617480:rs7617480;rs62262722:rs62262722:rs138653738	24
ENSG00000185909	KLHDC8B	3	49209044	49213917	1	protein_coding	200942	KLHDC8B	0.0104214	-0.0773522	9	15.13	388	1.0189e-25	0	TIGER/Nom_Alonso_Pancreatic_islets:eQTLcatalogue/CEDAR_platelet:eQTLcatalogue/GEUVADIS_ge_LCL:eQTLcatalogue/TwinsUK_ge_LCL:eQTLcatalogue/TwinsUK_ge_skin:eQTLGen_cis_eQTLs:BIOSQTL/BIOS_eQTL_geneLevel:CMC_SVA_cis:CMC_NoSVA_cis:GTEx/v8/Adipose_Subcutaneous:GTEx/v8/Cells_EBV-transformed_lymphocytes:GTEx/v8/Artery_Aorta:GTEx/v8/Artery_Tibial:GTEx/v8/Brain_Cerebellum:GTEx/v8/Brain_Nucleus_accumbens_bas…	NA	Yes	EP_links_oneway:Promoter_anchored_loops:Adult_Cortex:Fetal_Cortex:IMR90	1.071e-12	rs7617480;rs62262722;rs138653738;rs62262722:rs138653738:rs7617480:rs62262722:rs138653738	24
ENSG00000236980	C3orf84	3	49215065	49229291	-1	protein_coding	646498	C3orf84	0.000221292	0.0590497	12	15.13	2	3.19306e-05	0.014801	GTEx/v7/Testis	NA	Yes	Promoter_anchored_loops:Adult_Cortex:Fetal_Cortex:IMR90	1.071e-12	rs7617480;rs62262722;rs7617480:rs7617480;rs62262722:rs138653738:rs62262722	24
ENSG00000173421	CCDC36	3	49235861	49295537	1	protein_coding	339834	CCDC36	0.509349	-0.452713	24	11.88	360	5.46035e-45	1.27126e-36	EyeGEx:eQTLcatalogue/TwinsUK_ge_fat:PsychENCODE_eQTLs:GTEx/v8/Adipose_Subcutaneous:GTEx/v8/Adipose_Visceral_Omentum:GTEx/v8/Adrenal_Gland:GTEx/v8/Artery_Aorta:GTEx/v8/Artery_Coronary:GTEx/v8/Artery_Tibial:GTEx/v8/Breast_Mammary_Tissue:GTEx/v8/Colon_Sigmoid:GTEx/v8/Colon_Transverse:GTEx/v8/Esophagus_Gastroesophageal_Junction:GTEx/v8/Esophagus_Mucosa:GTEx/v8/Esophagus_Muscularis:GTEx/v8/Heart_Atria…	NA	Yes	Promoter_anchored_loops:IMR90	1.071e-12	rs7617480;rs62262722;rs138653738;rs7617480:rs7617480;rs62262722:rs62262722:rs138653738	24
ENSG00000225399	RP11-3B7.1	3	49297518	49298744	1	protein_coding	NA	NA	NA	NA	7	11.88	254	1.67527e-24	8.04195e-19	eQTLcatalogue/TwinsUK_ge_fat:PsychENCODE_eQTLs:GTEx/v8/Adipose_Subcutaneous:GTEx/v8/Adipose_Visceral_Omentum:GTEx/v8/Adrenal_Gland:GTEx/v8/Artery_Aorta:GTEx/v8/Artery_Coronary:GTEx/v8/Artery_Tibial:GTEx/v8/Brain_Anterior_cingulate_cortex_BA24:GTEx/v8/Colon_Sigmoid:GTEx/v8/Colon_Transverse:GTEx/v8/Esophagus_Gastroesophageal_Junction:GTEx/v8/Esophagus_Mucosa:GTEx/v8/Esophagus_Muscularis:GTEx/v8/Hea…	NA	Yes	Promoter_anchored_loops:Left_Ventricle:GM12878:IMR90:Mesenchymal_Stem_Cell	1.071e-12	rs7617480;rs62262722;rs138653738;rs138653738:rs7617480;rs62262722:rs7617480:rs62262722:rs138653738	24
ENSG00000188315	C3orf62	3	49306035	49315342	-1	protein_coding	100422952	C3orf62	0.00712466	-1.95031	10	11.88	270	3.25e-32	0	EyeGEx:eQTLcatalogue/Quach_2016_ge_monocyte_LPS:eQTLcatalogue/Quach_2016_ge_monocyte_naive:eQTLcatalogue/Quach_2016_ge_monocyte_Pam3CSK4:eQTLcatalogue/Quach_2016_ge_monocyte_R848:eQTLcatalogue/TwinsUK_ge_fat:eQTLGen_cis_eQTLs:BIOSQTL/BIOS_eQTL_geneLevel:CMC_SVA_cis:GTEx/v8/Adipose_Subcutaneous:GTEx/v8/Adipose_Visceral_Omentum:GTEx/v8/Adrenal_Gland:GTEx/v8/Artery_Aorta:GTEx/v8/Artery_Coronary:GTEx…	NA	Yes	Promoter_anchored_loops:Adult_Cortex:Fetal_Cortex:Left_Ventricle:GM12878:IMR90:Mesenchymal_Stem_Cell	1.071e-12	rs7617480;rs62262722;rs138653738;rs7617480:rs138653738:rs7617480;rs62262722:rs62262722:rs138653738	24
ENSG00000114316	USP4	3	49315264	49378145	-1	protein_coding	7375	USP4	6.20194e-07	NA	20	7.108	363	1.4967e-19	0	eQTLcatalogue/CEDAR_monocyte_CD14:eQTLcatalogue/CEDAR_neutrophil_CD15:eQTLcatalogue/CEDAR_T-cell_CD4:eQTLcatalogue/Fairfax_2012_B-cell_CD19:eQTLcatalogue/Fairfax_2014_IFN24:eQTLcatalogue/Fairfax_2014_LPS24:eQTLcatalogue/Fairfax_2014_LPS2:eQTLcatalogue/Fairfax_2014_naive:eQTLcatalogue/Kasela_2017_T-cell_CD4:eQTLcatalogue/Quach_2016_ge_monocyte_LPS:eQTLcatalogue/Quach_2016_ge_monocyte_Pam3CSK4:eQTL…	NA	Yes	Promoter_anchored_loops:EP_correlation_cell_type_oneway	1.071e-12	rs138653738;rs7617480;rs62262722;rs7617480:rs138653738:rs7617480;rs62262722:rs62262722	24
ENSG00000233276	GPX1	3	49394609	49396033	-1	protein_coding	2876	GPX1	0.00693165	-0.616399	7	13.18	325	0	0	TIGER/Nom_Alonso_Pancreatic_islets:EyeGEx:PsychENCODE_eQTLs:eQTLGen_cis_eQTLs:BIOSQTL/BIOS_eQTL_geneLevel:xQTLServer_eQTLs:CMC_SVA_cis:CMC_NoSVA_cis:GTEx/v8/Adipose_Subcutaneous:GTEx/v8/Adipose_Visceral_Omentum:GTEx/v8/Adrenal_Gland:GTEx/v8/Artery_Aorta:GTEx/v8/Artery_Tibial:GTEx/v8/Brain_Anterior_cingulate_cortex_BA24:GTEx/v8/Brain_Caudate_basal_ganglia:GTEx/v8/Brain_Cerebellar_Hemisphere:GTEx/v…	NA	Yes	Promoter_anchored_loops	1.071e-12	rs7617480;rs62262722;rs138653738;rs7617480:rs62262722:rs7617480;rs62262722:rs138653738	24
ENSG00000067560	RHOA	3	49396578	49450431	-1	protein_coding	387	RHOA	0.804698	-0.430263	38	13.18	273	3.50325e-18	2.138e-14	eQTLcatalogue/TwinsUK_ge_skin:CMC_SVA_cis:GTEx/v8/Adipose_Visceral_Omentum:GTEx/v8/Muscle_Skeletal:GTEx/v8/Nerve_Tibial:GTEx/v7/Adipose_Visceral_Omentum:GTEx/v7/Whole_Blood:GTEx/v7/Muscle_Skeletal:GTEx/v6/Muscle_Skeletal	NA	Yes	Promoter_anchored_loops:Adult_Cortex:Fetal_Cortex:Left_Ventricle:GM12878:IMR90:Mesenchymal_Stem_Cell:Trophoblast-like_Cell	1.071e-12	rs7617480;rs62262722;rs138653738;rs7617480:rs7617480;rs62262722:rs138653738:rs62262722:rs138653738	24
ENSG00000145022	TCTA	3	49449639	49453908	1	protein_coding	6988	TCTA	0.0132648	-0.595941	12	14.57	296	6.016e-28	0	TIGER/Nom_Alonso_Pancreatic_islets:eQTLcatalogue/HipSci_ge_iPSC:PsychENCODE_eQTLs:DICE/T_CD4_memory_TREG:eQTLGen_cis_eQTLs:BIOSQTL/BIOS_eQTL_geneLevel:GTEx/v8/Adipose_Subcutaneous:GTEx/v8/Artery_Tibial:GTEx/v8/Colon_Sigmoid:GTEx/v8/Colon_Transverse:GTEx/v8/Esophagus_Gastroesophageal_Junction:GTEx/v8/Esophagus_Mucosa:GTEx/v8/Esophagus_Muscularis:GTEx/v8/Lung:GTEx/v8/Cells_Cultured_fibroblasts:GTEx…	NA	Yes	Promoter_anchored_loops:Adult_Cortex:Fetal_Cortex:Left_Ventricle:GM12878:IMR90:Mesenchymal_Stem_Cell:Trophoblast-like_Cell	1.071e-12	rs7617480;rs62262722;rs138653738;rs7617480:rs7617480;rs62262722:rs138653738:rs62262722:rs138653738	24
ENSG00000145020	AMT	3	49454211	49460186	-1	protein_coding	275	AMT	0.000569475	-0.0226371	13	14.57	465	3.27170000000001e-310	0	TIGER/Nom_Alonso_Pancreatic_islets:Nom_InsPIRE_Islets_Gene_eQTLs_Nominal_Pvalues:EyeGEx:eQTLcatalogue/Fairfax_2012_B-cell_CD19:eQTLcatalogue/Fairfax_2014_naive:eQTLcatalogue/Kasela_2017_T-cell_CD4:eQTLcatalogue/Kasela_2017_T-cell_CD8:PsychENCODE_eQTLs:DICE/B_cell_naive:DICE/T_CD4_naive:DICE/T_CD8_naive:DICE/Monocyte_classical:DICE/Monocyte_non_classical:DICE/NK:DICE/T_CD4_TFH:DICE/T_CD4_TH17:DICE…	NA	Yes	Promoter_anchored_loops:Adult_Cortex:Fetal_Cortex:Left_Ventricle:GM12878:IMR90:Mesenchymal_Stem_Cell:Trophoblast-like_Cell	1.071e-12	rs7617480;rs62262722;rs138653738;rs7617480:rs7617480;rs62262722:rs138653738:rs62262722:rs138653738	24
ENSG00000145029	NICN1	3	49460379	49466759	-1	protein_coding	84276	NICN1	0.257246	-1.08729	8	14.57	441	3.27170000000001e-310	0	Nom_InsPIRE_Islets_Gene_eQTLs_Nominal_Pvalues:eQTLcatalogue/CEDAR_B-cell_CD19:eQTLcatalogue/CEDAR_T-cell_CD4:eQTLcatalogue/CEDAR_T-cell_CD8:eQTLcatalogue/Fairfax_2012_B-cell_CD19:eQTLcatalogue/Fairfax_2014_LPS2:eQTLcatalogue/Fairfax_2014_naive:eQTLcatalogue/Kasela_2017_T-cell_CD4:eQTLcatalogue/Kasela_2017_T-cell_CD8:PsychENCODE_eQTLs:DICE/B_cell_naive:DICE/T_CD4_naive:DICE/T_CD8_naive:DICE/Monocy…	NA	Yes	Promoter_anchored_loops:Adult_Cortex:Fetal_Cortex:Left_Ventricle:GM12878:IMR90:Mesenchymal_Stem_Cell:Trophoblast-like_Cell	1.071e-12	rs7617480;rs62262722;rs138653738;rs138653738:rs7617480;rs62262722:rs7617480:rs62262722	24
ENSG00000173402	DAG1	3	49506146	49573048	1	protein_coding	1605	DAG1	0.940922	-0.838742	41	13.88	207	8.6747e-26	0	eQTLcatalogue/Fairfax_2014_LPS2:eQTLGen_cis_eQTLs:BIOSQTL/BIOS_eQTL_geneLevel:GTEx/v8/Whole_Blood:GTEx/v8/Esophagus_Mucosa:GTEx/v8/Heart_Left_Ventricle:GTEx/v8/Cells_Cultured_fibroblasts:GTEx/v8/Thyroid:GTEx/v7/Esophagus_Mucosa:GTEx/v7/Heart_Left_Ventricle:GTEx/v7/Muscle_Skeletal:GTEx/v7/Cells_Transformed_fibroblasts	NA	Yes	Promoter_anchored_loops:Adult_Cortex:Fetal_Cortex	1.071e-12	rs7617480;rs62262722;rs138653738;rs62262722:rs7617480:rs138653738:rs62262722	24
ENSG00000164061	BSN	3	49591922	49708978	1	protein_coding	8927	BSN	1	-1.28511	54	11.57	66	6.57551e-08	9.74763e-06	EyeGEx:PsychENCODE_eQTLs:BIOSQTL/BIOS_eQTL_geneLevel:GTEx/v8/Brain_Cerebellum:GTEx/v8/Liver:GTEx/v8/Thyroid:GTEx/v7/Brain_Cortex	NA	Yes	Promoter_anchored_loops:Adult_Cortex:Fetal_Cortex:Left_Ventricle:Liver:Spleen:IMR90:Mesenchymal_Stem_Cell:Mesendoderm:Trophoblast-like_Cell:hESC	1.071e-12	rs7617480;rs62262722;rs138653738;rs62262722:rs7617480;rs62262722:rs138653738:rs7617480	24
ENSG00000164062	APEH	3	49711435	49721396	1	protein_coding	327	APEH	0.0132157	-0.271805	3	13.52	239	1.1464e-88	0	eQTLcatalogue/Fairfax_2012_B-cell_CD19:eQTLcatalogue/Fairfax_2014_LPS24:eQTLcatalogue/Fairfax_2014_naive:eQTLcatalogue/Lepik_2017_ge_blood:eQTLGen_cis_eQTLs:BIOSQTL/BIOS_eQTL_geneLevel:GTEx/v8/Adipose_Subcutaneous:GTEx/v8/Adipose_Visceral_Omentum:GTEx/v8/Artery_Aorta:GTEx/v8/Artery_Tibial:GTEx/v8/Brain_Cerebellar_Hemisphere:GTEx/v8/Breast_Mammary_Tissue:GTEx/v8/Esophagus_Mucosa:GTEx/v8/Esophagus_…	NA	Yes	Promoter_anchored_loops:Left_Ventricle:Liver:Spleen:IMR90:Mesenchymal_Stem_Cell:Mesendoderm:Trophoblast-like_Cell:hESC	1.071e-12	rs62262722;rs7617480;rs138653738:rs7617480;rs62262722:rs7617480:rs138653738;rs62262722:rs62262722	24
ENSG00000173531	MST1	3	49721380	49726934	-1	protein_coding	4485	MST1	1.72736e-10	0.158165	2	13.52	142	1.1515e-14	2.09399e-18	TIGER/Nom_Alonso_Pancreatic_islets:EyeGEx:eQTLcatalogue/TwinsUK_ge_LCL:eQTLcatalogue/TwinsUK_ge_skin:eQTLGen_cis_eQTLs:BIOSQTL/BIOS_eQTL_geneLevel:GTEx/v8/Adipose_Subcutaneous:GTEx/v8/Adipose_Visceral_Omentum:GTEx/v8/Artery_Aorta:GTEx/v8/Artery_Tibial:GTEx/v8/Brain_Amygdala:GTEx/v8/Brain_Anterior_cingulate_cortex_BA24:GTEx/v8/Brain_Cerebellum:GTEx/v8/Brain_Cortex:GTEx/v8/Brain_Frontal_Cortex_BA9:…	NA	Yes	Promoter_anchored_loops	1.244e-10	rs7617480;rs62262722;rs138653738;rs62262722:rs7617480:rs62262722	24
ENSG00000164068	RNF123	3	49726932	49758962	1	protein_coding	63891	RNF123	0.969715	-0.461991	12	22.4	334	8.00243e-54	0	Nom_InsPIRE_Islets_Gene_eQTLs_Nominal_Pvalues:EyeGEx:eQTLcatalogue/BLUEPRINT_ge_monocyte:eQTLcatalogue/BrainSeq_ge_brain:eQTLcatalogue/GEUVADIS_ge_LCL:eQTLcatalogue/Quach_2016_ge_monocyte_IAV:eQTLcatalogue/Quach_2016_ge_monocyte_naive:eQTLcatalogue/Quach_2016_ge_monocyte_Pam3CSK4:eQTLcatalogue/Quach_2016_ge_monocyte_R848:eQTLcatalogue/TwinsUK_ge_skin:PsychENCODE_eQTLs:eQTLGen_cis_eQTLs:BIOSQTL/BI…	NA	Yes	Promoter_anchored_loops	1.071e-12	rs7617480;rs62262722;rs138653738;rs62262722:rs7617480:rs62262722	24
ENSG00000176020	AMIGO3	3	49754267	49761349	-1	protein_coding	386724	AMIGO3	7.50516e-06	NA	11	22.4	107	8.00243e-54	0	Nom_InsPIRE_Islets_Gene_eQTLs_Nominal_Pvalues:BIOSQTL/BIOS_eQTL_geneLevel	NA	Yes	Promoter_anchored_loops:Adult_Cortex:Fetal_Cortex:IMR90:Mesenchymal_Stem_Cell	2.166e-10	rs7617480;rs62262722;rs138653738;rs138653738:rs62262722:rs7617480:rs7617480;rs62262722:rs138653738	24
ENSG00000173540	GMPPB	3	49754277	49761384	-1	protein_coding	386724	GMPPB	8.24536e-05	-0.659554	11	22.4	394	1.40342e-76	0	TIGER/Nom_Alonso_Pancreatic_islets:Nom_InsPIRE_Islets_Gene_eQTLs_Nominal_Pvalues:EyeGEx:eQTLcatalogue/BLUEPRINT_ge_monocyte:eQTLcatalogue/BLUEPRINT_ge_neutrophil:eQTLcatalogue/BLUEPRINT_ge_T-cell:eQTLcatalogue/BrainSeq_ge_brain:eQTLcatalogue/GENCORD_ge_fibroblast:eQTLcatalogue/GENCORD_ge_T-cell:eQTLcatalogue/Lepik_2017_ge_blood:eQTLcatalogue/TwinsUK_ge_blood:eQTLcatalogue/TwinsUK_ge_fat:eQTLcatal…	NA	Yes	Promoter_anchored_loops:Adult_Cortex:Fetal_Cortex:IMR90:Mesenchymal_Stem_Cell	1.071e-12	rs7617480;rs62262722;rs138653738;rs138653738:rs62262722:rs7617480:rs7617480;rs62262722:rs138653738	24
ENSG00000176095	IP6K1	3	49761727	49823975	-1	protein_coding	9807	IP6K1	0.23518	-2.10343	40	22.4	242	9.07028e-08	0.000365035	eQTLcatalogue/Nedelec_2016_ge_macrophage_Salmonella:eQTLcatalogue/Quach_2016_ge_monocyte_IAV:GTEx/v8/Adipose_Subcutaneous:GTEx/v8/Adipose_Visceral_Omentum:GTEx/v8/Artery_Tibial:GTEx/v8/Esophagus_Gastroesophageal_Junction:GTEx/v8/Esophagus_Mucosa:GTEx/v8/Esophagus_Muscularis:GTEx/v8/Muscle_Skeletal:GTEx/v8/Nerve_Tibial:GTEx/v8/Skin_Not_Sun_Exposed_Suprapubic:GTEx/v8/Skin_Sun_Exposed_Lower_leg:GTEx…	NA	Yes	Promoter_anchored_loops	1.071e-12	rs7617480;rs62262722;rs138653738;rs62262722:rs7617480	24
ENSG00000187492	CDHR4	3	49828165	49837268	-1	protein_coding	389118	CDHR4	0.0134739	0.0436097	8	8.931	263	3.76221e-34	3.60667e-66	eQTLcatalogue/Quach_2016_ge_monocyte_IAV:eQTLcatalogue/TwinsUK_ge_skin:GTEx/v8/Artery_Aorta:GTEx/v8/Artery_Tibial:GTEx/v8/Colon_Sigmoid:GTEx/v8/Esophagus_Mucosa:GTEx/v8/Nerve_Tibial:GTEx/v8/Skin_Not_Sun_Exposed_Suprapubic:GTEx/v8/Skin_Sun_Exposed_Lower_leg:GTEx/v8/Testis:GTEx/v8/Thyroid:GTEx/v7/Artery_Tibial:GTEx/v7/Skin_Not_Sun_Exposed_Suprapubic:GTEx/v7/Skin_Sun_Exposed_Lower_leg:GTEx/v7/Testis…	NA	Yes	Promoter_anchored_loops	1.071e-12	rs7617480;rs62262722;rs138653738;rs7617480:rs7617480;rs62262722:rs62262722	24
ENSG00000185614	FAM212A	3	49840687	49842463	1	protein_coding	389119	FAM212A	0.000589161	NA	7	14.84	264	4.5973e-52	0	eQTLcatalogue/CEDAR_B-cell_CD19:eQTLcatalogue/Fairfax_2012_B-cell_CD19:eQTLcatalogue/TwinsUK_ge_skin:eQTLGen_cis_eQTLs:BIOSQTL/BIOS_eQTL_geneLevel:GTEx/v8/Artery_Aorta:GTEx/v8/Artery_Tibial:GTEx/v8/Brain_Cerebellar_Hemisphere:GTEx/v8/Brain_Cerebellum:GTEx/v8/Esophagus_Mucosa:GTEx/v8/Muscle_Skeletal:GTEx/v8/Ovary:GTEx/v8/Cells_Cultured_fibroblasts:GTEx/v8/Skin_Not_Sun_Exposed_Suprapubic:GTEx/v8/Sk…	NA	Yes	Promoter_anchored_loops:Spleen	1.071e-12	rs7617480;rs62262722;rs138653738;rs138653738:rs7617480:rs7617480;rs62262722:rs62262722	24
ENSG00000182179	UBA7	3	49842640	49851379	-1	protein_coding	100847079	UBA7	2.68228e-14	-0.315381	11	14.84	303	3.27170000000001e-310	0	TIGER/Nom_Alonso_Pancreatic_islets:eQTLcatalogue/BLUEPRINT_ge_monocyte:eQTLcatalogue/BLUEPRINT_ge_neutrophil:eQTLcatalogue/BLUEPRINT_ge_T-cell:eQTLcatalogue/CEDAR_B-cell_CD19:eQTLcatalogue/CEDAR_ileum:eQTLcatalogue/CEDAR_monocyte_CD14:eQTLcatalogue/CEDAR_neutrophil_CD15:eQTLcatalogue/CEDAR_rectum:eQTLcatalogue/CEDAR_T-cell_CD4:eQTLcatalogue/CEDAR_T-cell_CD8:eQTLcatalogue/CEDAR_transverse_colon:eQ…	NA	Yes	Promoter_anchored_loops:Spleen	1.071e-12	rs7617480;rs62262722;rs138653738;rs7617480:rs7617480;rs62262722:rs138653738:rs62262722	24
ENSG00000183763	TRAIP	3	49866034	49894007	-1	protein_coding	10293	TRAIP	0.125104	-0.132255	18	14.37	153	1.07465e-07	1.80825e-07	EyeGEx:CMC_SVA_cis:GTEx/v8/Testis:GTEx/v7/Lung:GTEx/v6/Testis	NA	Yes	Adult_Cortex:Fetal_Cortex:Spleen:IMR90:Mesenchymal_Stem_Cell	1.071e-12	rs7617480;rs62262722;rs138653738:rs7617480;rs62262722:rs7617480:rs62262722:rs138653738	24
ENSG00000164076	CAMKV	3	49895421	49907655	-1	protein_coding	79012	CAMKV	0.996846	-0.638323	6	14.37	43	1.29758e-16	2.29471e-14	EyeGEx:eQTLcatalogue/CEDAR_ileum:eQTLcatalogue/HipSci_ge_iPSC:PsychENCODE_eQTLs:BRAINEAC/FCTX:BRAINEAC/aveALL:GTEx/v8/Stomach:GTEx/v8/Testis:GTEx/v7/Stomach:GTEx/v7/Testis:GTEx/v6/Stomach	NA	Yes	Promoter_anchored_loops:Adult_Cortex:Fetal_Cortex:Spleen:IMR90:Mesenchymal_Stem_Cell	1.059e-09	rs7617480;rs62262722;rs138653738;rs62262722:rs7617480:rs7617480;rs62262722:rs138653738:rs138653738	24
ENSG00000164078	MST1R	3	49924435	49941299	-1	protein_coding	4486	MST1R	1.69349e-20	-0.377645	1	12.19	147	4.86863e-16	3.12618e-16	eQTLcatalogue/TwinsUK_ge_fat:BIOSQTL/BIOS_eQTL_geneLevel:GTEx/v8/Adipose_Subcutaneous:GTEx/v8/Adipose_Visceral_Omentum:GTEx/v8/Whole_Blood:GTEx/v8/Artery_Aorta:GTEx/v8/Artery_Tibial:GTEx/v8/Brain_Anterior_cingulate_cortex_BA24:GTEx/v8/Brain_Caudate_basal_ganglia:GTEx/v8/Brain_Cerebellar_Hemisphere:GTEx/v8/Brain_Cerebellum:GTEx/v8/Brain_Cortex:GTEx/v8/Brain_Hypothalamus:GTEx/v8/Brain_Nucleus_accum…	NA	Yes	Promoter_anchored_loops	1.071e-12	rs62262722;rs7617480;rs7617480:rs138653738:rs7617480;rs62262722:rs62262722	24
ENSG00000228008	CTD-2330K9.3	3	49941278	49954370	1	protein_coding	NA	NA	NA	NA	3	12.19	111	1.90302e-08	2.36031e-07	GTEx/v8/Artery_Aorta:GTEx/v8/Colon_Transverse:GTEx/v8/Esophagus_Muscularis:GTEx/v8/Lung:GTEx/v8/Pituitary:GTEx/v8/Small_Intestine_Terminal_Ileum:GTEx/v8/Stomach:GTEx/v8/Thyroid:GTEx/v7/Artery_Aorta:GTEx/v7/Esophagus_Muscularis:GTEx/v7/Small_Intestine_Terminal_Ileum:GTEx/v7/Thyroid:GTEx/v6/Artery_Aorta	NA	Yes	Promoter_anchored_loops	2.166e-10	rs62262722;rs138653738;rs7617480;rs7617480:rs138653738:rs7617480;rs62262722:rs62262722	24
ENSG00000164077	MON1A	3	49946302	49967606	-1	protein_coding	84315	MON1A	0.00636811	-0.629673	5	12.19	153	7.048e-23	0	eQTLcatalogue/Fairfax_2014_IFN24:eQTLcatalogue/Fairfax_2014_LPS24:eQTLcatalogue/Fairfax_2014_naive:eQTLGen_cis_eQTLs:GTEx/v8/Adrenal_Gland:GTEx/v8/Whole_Blood:GTEx/v8/Artery_Aorta:GTEx/v8/Pituitary:GTEx/v8/Testis:GTEx/v8/Thyroid:GTEx/v7/Testis	NA	Yes	Promoter_anchored_loops:Adult_Cortex:Fetal_Cortex	1.071e-12	rs62262722;rs138653738;rs7617480;rs7617480:rs138653738:rs7617480;rs62262722:rs62262722	24
ENSG00000004534	RBM6	3	49977440	50137478	1	protein_coding	10180	RBM6	1	-0.685653	20	7.756	306	3.27167000000001e-310	0	TIGER/Nom_Alonso_Pancreatic_islets:EyeGEx:eQTLcatalogue/Alasoo_2018_ge_macrophage_IFNg:eQTLcatalogue/Alasoo_2018_ge_macrophage_naive:eQTLcatalogue/BLUEPRINT_ge_monocyte:eQTLcatalogue/BLUEPRINT_ge_neutrophil:eQTLcatalogue/BLUEPRINT_ge_T-cell:eQTLcatalogue/BrainSeq_ge_brain:eQTLcatalogue/CEDAR_neutrophil_CD15:eQTLcatalogue/Fairfax_2012_B-cell_CD19:eQTLcatalogue/Fairfax_2014_naive:eQTLcatalogue/GENC…	NA	Yes	Promoter_anchored_loops	1.071e-12	rs62262722;rs7617480;rs138653738;rs7617480:rs7617480;rs62262722:rs138653738:rs138653738;rs62262722:rs62262722	24
ENSG00000003756	RBM5	3	50126341	50156454	1	protein_coding	10181	RBM5	0.999999	-0.605889	2	6.95	46	6.07308e-13	1.12253e-10	EyeGEx:eQTLcatalogue/Kasela_2017_T-cell_CD4:BIOSQTL/BIOS_eQTL_geneLevel:GTEx/v8/Brain_Cerebellum:GTEx/v8/Esophagus_Mucosa:GTEx/v8/Nerve_Tibial:GTEx/v7/Esophagus_Mucosa:GTEx/v7/Nerve_Tibial	NA	Yes	Promoter_anchored_loops:Adult_Cortex:Fetal_Cortex:Liver:GM12878:IMR90:Mesenchymal_Stem_Cell:Mesendoderm:Trophoblast-like_Cell:hESC	1.059e-09	rs62262722;rs7617480;rs138653738;rs7617480:rs7617480;rs62262722:rs62262722:rs138653738;rs62262722:rs138653738	24
ENSG00000001617	SEMA3F	3	50192478	50226508	1	protein_coding	6405	SEMA3F	0.999918	NA	4	11.77	173	4.09083e-11	8.517e-09	EyeGEx:eQTLcatalogue/Quach_2016_ge_monocyte_IAV:eQTLcatalogue/Quach_2016_ge_monocyte_naive:xQTLServer_eQTLs:CMC_SVA_cis:GTEx/v8/Adipose_Subcutaneous:GTEx/v8/Adipose_Visceral_Omentum:GTEx/v8/Artery_Aorta:GTEx/v8/Brain_Cortex:GTEx/v8/Heart_Atrial_Appendage:GTEx/v8/Heart_Left_Ventricle:GTEx/v8/Lung:GTEx/v8/Nerve_Tibial:GTEx/v7/Adipose_Visceral_Omentum:GTEx/v7/Artery_Aorta:GTEx/v7/Heart_Atrial_Append…	NA	Yes	Promoter_anchored_loops	1.071e-12	rs7617480;rs62262722;rs62262722:rs7617480:rs138653738;rs62262722:rs62262722	24
ENSG00000114349	GNAT1	3	50229045	50233949	1	protein_coding	2779	GNAT1	2.50523e-06	-0.274733	0	0	7	4.50773e-05	0.00417461	GTEx/v8/Lung:GTEx/v7/Lung	NA	Yes	Promoter_anchored_loops:Adult_Cortex:Fetal_Cortex:Left_Ventricle:Liver:Spleen:GM12878:IMR90:Mesenchymal_Stem_Cell:Mesendoderm:Trophoblast-like_Cell:hESC	1.071e-12	rs7617480;rs62262722;rs7617480:rs7617480;rs62262722:rs138653738:rs62262722:rs138653738	24
ENSG00000114353	GNAI2	3	50263724	50296787	1	protein_coding	2771	GNAI2	0.86116	-0.965006	0	0	7	0.000203949	0.0122345	PsychENCODE_eQTLs:GTEx/v8/Skin_Sun_Exposed_Lower_leg	NA	Yes	Promoter_anchored_loops:Adult_Cortex:Fetal_Cortex:IMR90:Mesenchymal_Stem_Cell:Trophoblast-like_Cell	1.071e-12	rs7617480;rs62262722;rs62262722:rs7617480:rs62262722:rs138653738:rs138653738	24
ENSG00000179564	LSMEM2	3	50316458	50325545	1	protein_coding	132228	LSMEM2	2.89144e-05	-0.548022	1	9.135	2	0.000694779	0.00239992	GTEx/v8/Muscle_Skeletal	NA	Yes	Promoter_anchored_loops:Left_Ventricle:Liver:Spleen:GM12878:IMR90:Mesenchymal_Stem_Cell:Trophoblast-like_Cell	2.249e-09	rs62262722;rs7617480;rs62262722:rs7617480:rs62262722	24
ENSG00000214706	IFRD2	3	50325163	50330349	-1	protein_coding	7866	IFRD2	5.5261e-06	-0.616738	1	8.57	16	1.00649e-59	0	eQTLGen_cis_eQTLs:BIOSQTL/BIOS_eQTL_geneLevel	NA	Yes	Promoter_anchored_loops	2.752e-09	rs62262722;rs7617480;rs62262722:rs7617480:rs138653738;rs62262722:rs62262722	24
ENSG00000186792	HYAL3	3	50330262	50336899	-1	protein_coding	8372	HYAL3	1.52466e-05	-0.35315	4	21	207	3.27170000000001e-310	0	EyeGEx:eQTLcatalogue/BrainSeq_ge_brain:eQTLcatalogue/CEDAR_B-cell_CD19:eQTLcatalogue/CEDAR_monocyte_CD14:eQTLcatalogue/Fairfax_2012_B-cell_CD19:eQTLcatalogue/Fairfax_2014_IFN24:eQTLcatalogue/Fairfax_2014_LPS24:eQTLcatalogue/Fairfax_2014_naive:eQTLcatalogue/HipSci_ge_iPSC:eQTLcatalogue/Lepik_2017_ge_blood:eQTLcatalogue/TwinsUK_ge_fat:eQTLcatalogue/TwinsUK_ge_LCL:PsychENCODE_eQTLs:eQTLGen_cis_eQTLs…	NA	Yes	Promoter_anchored_loops	2.166e-10	rs62262722;rs7617480;rs138653738;rs62262722:rs7617480:rs7617480;rs62262722:rs62262722	24
ENSG00000243477	NAT6	3	50333833	50336852	-1	protein_coding	24142	NAT6	0.402945	-0.113189	4	21	112	5.8379e-37	0	PsychENCODE_eQTLs:eQTLGen_cis_eQTLs:BIOSQTL/BIOS_eQTL_geneLevel:GTEx/v8/Adipose_Subcutaneous:GTEx/v8/Adipose_Visceral_Omentum:GTEx/v8/Adrenal_Gland:GTEx/v8/Artery_Aorta:GTEx/v8/Artery_Tibial:GTEx/v8/Brain_Anterior_cingulate_cortex_BA24:GTEx/v8/Brain_Caudate_basal_ganglia:GTEx/v8/Brain_Cortex:GTEx/v8/Brain_Frontal_Cortex_BA9:GTEx/v8/Brain_Hypothalamus:GTEx/v8/Colon_Sigmoid:GTEx/v8/Colon_Transverse…	NA	Yes	Promoter_anchored_loops	2.166e-10	rs62262722;rs7617480;rs138653738;rs62262722:rs7617480:rs7617480;rs62262722:rs62262722	24
ENSG00000114378	HYAL1	3	50337320	50349812	-1	protein_coding	3373	HYAL1	0.00553671	0.476164	4	21	39	1.5913e-17	3.49963e-17	BIOSQTL/BIOS_eQTL_geneLevel:xQTLServer_eQTLs:GTEx/v8/Adrenal_Gland:GTEx/v8/Artery_Tibial:GTEx/v8/Esophagus_Gastroesophageal_Junction:GTEx/v8/Esophagus_Muscularis:GTEx/v8/Heart_Left_Ventricle:GTEx/v8/Nerve_Tibial:GTEx/v8/Skin_Sun_Exposed_Lower_leg:GTEx/v7/Adrenal_Gland:GTEx/v7/Nerve_Tibial:GTEx/v6/Nerve_Tibial	NA	Yes	Promoter_anchored_loops	2.752e-09	rs62262722;rs7617480;rs138653738;rs62262722:rs7617480:rs138653738;rs62262722:rs62262722	24
ENSG00000114383	TUSC2	3	50357458	50365682	-1	protein_coding	11334	TUSC2	0.703033	-0.593776	0	0	28	1.96197e-05	0.00671493	GTEx/v8/Nerve_Tibial:GTEx/v8/Skin_Not_Sun_Exposed_Suprapubic	NA	Yes	Adult_Cortex:Fetal_Cortex:IMR90	3.636e-10	rs7617480;rs62262722;rs138653738;rs7617480:rs138653738:rs7617480;rs62262722:rs138653738;rs62262722:rs62262722	24
ENSG00000068028	RASSF1	3	50367219	50378411	-1	protein_coding	11186	RASSF1	4.8582e-08	-0.411947	0	0	20	3.69155e-06	2.70638e-09	eQTLcatalogue/BrainSeq_ge_brain:GTEx/v8/Skin_Not_Sun_Exposed_Suprapubic	NA	Yes	Promoter_anchored_loops:Adult_Cortex:Fetal_Cortex:IMR90	1.858e-09	rs138653738;rs62262722;rs7617480;rs138653738:rs62262722:rs7617480:rs7617480;rs62262722:rs138653738	24
ENSG00000004838	ZMYND10	3	50378541	50384283	-1	protein_coding	51364	ZMYND10	3.6024e-07	-0.824531	0	0	3	1.78893e-05	0.0235137	DICE/Monocyte_classical:GTEx/v7/Brain_Cerebellar_Hemisphere	NA	Yes	Adult_Cortex:IMR90	0.001228	rs7617480;rs62262722;rs138653738;rs62262722:rs7617480	24
ENSG00000114388	NPRL2	3	50384761	50388522	-1	protein_coding	10641	NPRL2	0.345175	-0.107064	0	0	5	0.000235833	0.0328083	GTEx/v8/Breast_Mammary_Tissue	NA	Yes	Adult_Cortex:IMR90	0.001228	rs7617480;rs138653738;rs62262722:rs7617480	24
ENSG00000114395	CYB561D2	3	50388126	50395891	1	protein_coding	11068	CYB561D2	0.0147105	-0.298456	0	0	2	0.000133394	3.27648e-10	GTEx/v8/Breast_Mammary_Tissue:GTEx/v8/Esophagus_Mucosa	NA	Yes	Adult_Cortex:IMR90	0.001097	rs138653738;rs62262722;rs62262722:rs7617480	24
ENSG00000007402	CACNA2D2	3	50400233	50541675	-1	protein_coding	9254	CACNA2D2	0.999693	NA	0	0	101	3.4281e-23	0	eQTLcatalogue/BLUEPRINT_ge_T-cell:eQTLGen_cis_eQTLs:BIOSQTL/BIOS_eQTL_geneLevel:GTEx/v8/Pancreas	NA	Yes	Promoter_anchored_loops	2.166e-10	rs62262722;rs7617480	24
ENSG00000088543	C3orf18	3	50595462	50608458	-1	protein_coding	51161	C3orf18	0.014308	-1.53819	0	0	12	5.4025e-11	0	eQTLGen_cis_eQTLs:GTEx/v8/Cells_Cultured_fibroblasts:GTEx/v8/Thyroid:GTEx/v7/Thyroid	NA	No	NA	8.538e-07	rs62262722	24
ENSG00000114735	HEMK1	3	50606583	50622366	1	protein_coding	51409	HEMK1	8.23153e-05	-2.53452	0	0	109	6.8624e-41	0	eQTLGen_cis_eQTLs:GTEx/v8/Whole_Blood:GTEx/v8/Nerve_Tibial:GTEx/v8/Cells_Cultured_fibroblasts:GTEx/v7/Cells_Transformed_fibroblasts	NA	No	NA	2.166e-10	rs7617480;rs62262722;rs138653738	24
ENSG00000114738	MAPKAPK3	3	50648951	50686720	1	protein_coding	7867	MAPKAPK3	2.71041e-06	0.0772686	0	0	105	5.9181e-42	0	eQTLcatalogue/BLUEPRINT_ge_monocyte:eQTLGen_cis_eQTLs:GTEx/v8/Whole_Blood:GTEx/v8/Muscle_Skeletal:GTEx/v8/Thyroid:GTEx/v7/Muscle_Skeletal:GTEx/v7/Thyroid:GTEx/v6/Heart_Left_Ventricle:GTEx/v6/Muscle_Skeletal:GTEx/v6/Thyroid	NA	No	NA	3.91e-10	rs138653738;rs7617480;rs62262722	24
ENSG00000088538	DOCK3	3	50712672	51421629	1	protein_coding	1795	DOCK3	1	-0.836765	0	0	40	2.17e-10	0	eQTLGen_cis_eQTLs:GTEx/v8/Artery_Tibial:GTEx/v8/Lung:GTEx/v8/Nerve_Tibial:GTEx/v8/Skin_Not_Sun_Exposed_Suprapubic:GTEx/v8/Skin_Sun_Exposed_Lower_leg:GTEx/v8/Thyroid:GTEx/v7/Artery_Tibial:GTEx/v7/Thyroid:GTEx/v6/Thyroid	NA	No	NA	2.688e-09	rs138653738;rs62262722;rs7617480	24
ENSG00000189283	FHIT	3	59735036	61237133	-1	protein_coding	2272	FHIT	0.00139184	0.884593	0	0	1	8.082e-06	0.0488146	eQTLGen_trans_eQTLs	NA	No	NA	0.0007836	rs5751069	109
ENSG00000080822	CLDND1	3	98216756	98241910	-1	protein_coding	56650	CLDND1	0.590515	-0.598219	0	0	4	3.1882e-13	0	eQTLGen_trans_eQTLs	NA	No	NA	1.527e-07	rs13054099;rs5751069	109
ENSG00000184220	CMSS1	3	99536678	99897447	1	protein_coding	84319	CMSS1	0.000665485	-0.661714	0	0	1	5.6308e-06	0.0363538	eQTLGen_trans_eQTLs	NA	No	NA	1.66e-15	rs4938023	79
ENSG00000186265	BTLA	3	112182815	112218408	-1	protein_coding	151888	BTLA	0.430977	-0.43896	0	0	1	7.0227e-06	0.0435005	eQTLGen_trans_eQTLs	NA	No	NA	1.391e-05	rs9074	107
ENSG00000168779	SHOX2	3	157814948	157824292	-1	protein_coding	6474	SHOX2	0.0852112	0.382489	4	7.1	330	8.99164e-10	2.67467e-14	eQTLcatalogue/Nedelec_2016_ge_macrophage_Listeria:eQTLcatalogue/Quach_2016_ge_monocyte_LPS:BIOSQTL/BIOS_eQTL_geneLevel:GTEx/v8/Whole_Blood:GTEx/v8/Esophagus_Muscularis:GTEx/v8/Lung:GTEx/v8/Muscle_Skeletal:GTEx/v8/Nerve_Tibial:GTEx/v8/Cells_Cultured_fibroblasts:GTEx/v8/Testis:GTEx/v7/Whole_Blood:GTEx/v7/Esophagus_Muscularis:GTEx/v7/Nerve_Tibial:GTEx/v7/Cells_Transformed_fibroblasts:GTEx/v6/Whole_B…	NA	Yes	Promoter_anchored_loops:Adult_Cortex:Fetal_Cortex:Aorta:Left_Ventricle:GM12878:IMR90:Mesenchymal_Stem_Cell:Mesendoderm:Neural_Progenitor_Cell:Trophoblast-like_Cell:hESC	6.346e-10	rs9856753;rs1656374;rs1656374:rs9856753:rs9856753	25
ENSG00000174891	RSRC1	3	157823644	158263519	1	protein_coding	51319	RSRC1	3.41026e-05	-0.589078	412	20.1	406	2.9945e-135	0	EyeGEx:eQTLcatalogue/BLUEPRINT_ge_monocyte:eQTLcatalogue/BLUEPRINT_ge_neutrophil:eQTLcatalogue/BrainSeq_ge_brain:eQTLcatalogue/CEDAR_B-cell_CD19:eQTLcatalogue/CEDAR_monocyte_CD14:eQTLcatalogue/CEDAR_T-cell_CD4:eQTLcatalogue/CEDAR_T-cell_CD8:eQTLcatalogue/Fairfax_2012_B-cell_CD19:eQTLcatalogue/Fairfax_2014_LPS24:eQTLcatalogue/Fairfax_2014_naive:eQTLcatalogue/GENCORD_ge_T-cell:eQTLcatalogue/GEUVADI…	NA	Yes	Promoter_anchored_loops:Adult_Cortex:Fetal_Cortex:Aorta:Left_Ventricle:GM12878:IMR90:Mesenchymal_Stem_Cell:Mesendoderm:Neural_Progenitor_Cell:Trophoblast-like_Cell:hESC	6.346e-10	rs9856753;rs1656374;rs1656374:rs9856753:rs9856753	25
ENSG00000178053	MLF1	3	158288952	158325041	1	protein_coding	4291	MLF1	1.28388e-06	-0.00223427	32	9.594	398	4.95261e-48	0	eQTLcatalogue/GEUVADIS_ge_LCL:eQTLcatalogue/HipSci_ge_iPSC:eQTLcatalogue/Lepik_2017_ge_blood:eQTLcatalogue/Nedelec_2016_ge_macrophage_Listeria:eQTLcatalogue/Nedelec_2016_ge_macrophage_naive:eQTLcatalogue/Nedelec_2016_ge_macrophage_Salmonella:eQTLcatalogue/Quach_2016_ge_monocyte_naive:eQTLcatalogue/TwinsUK_ge_skin:PsychENCODE_eQTLs:DICE/T_CD4_naive:DICE/T_CD8_naive:DICE/NK:DICE/T_CD4_TH1:DICE/T_CD…	NA	Yes	Fetal_Cortex:Left_Ventricle:GM12878:IMR90:Mesenchymal_Stem_Cell:Mesendoderm:hESC	6.346e-10	rs9856753;rs1656374;rs1656374:rs9856753	25
ENSG00000168827	GFM1	3	158362067	158410364	1	protein_coding	85476	GFM1	1.66398e-06	0.0254375	23	9.436	412	0	0	TIGER/Nom_Alonso_Pancreatic_islets:EyeGEx:eQTLcatalogue/BLUEPRINT_ge_monocyte:eQTLcatalogue/BrainSeq_ge_brain:eQTLcatalogue/CEDAR_monocyte_CD14:eQTLcatalogue/CEDAR_T-cell_CD8:eQTLcatalogue/CEDAR_transverse_colon:eQTLcatalogue/Fairfax_2012_B-cell_CD19:eQTLcatalogue/Fairfax_2014_IFN24:eQTLcatalogue/Fairfax_2014_LPS24:eQTLcatalogue/Fairfax_2014_LPS2:eQTLcatalogue/Fairfax_2014_naive:eQTLcatalogue/GEN…	NA	Yes	Adult_Cortex:Fetal_Cortex:Aorta:Left_Ventricle:IMR90:Mesenchymal_Stem_Cell:Mesendoderm:Trophoblast-like_Cell:hESC	6.346e-10	rs1656374;rs9856753;rs1656374:rs9856753	25
ENSG00000079257	LXN	3	158363611	158390482	-1	protein_coding	56925	LXN	0.00362044	-0.0999149	15	9.436	337	3.27170000000001e-310	0	EyeGEx:eQTLcatalogue/Alasoo_2018_ge_macrophage_IFNg:eQTLcatalogue/Alasoo_2018_ge_macrophage_Salmonella:eQTLcatalogue/BLUEPRINT_ge_monocyte:eQTLcatalogue/BLUEPRINT_ge_neutrophil:eQTLcatalogue/BLUEPRINT_ge_T-cell:eQTLcatalogue/CEDAR_B-cell_CD19:eQTLcatalogue/CEDAR_monocyte_CD14:eQTLcatalogue/CEDAR_neutrophil_CD15:eQTLcatalogue/CEDAR_platelet:eQTLcatalogue/CEDAR_T-cell_CD4:eQTLcatalogue/CEDAR_T-cell…	NA	Yes	Adult_Cortex:Fetal_Cortex:Aorta:Left_Ventricle:IMR90:Mesenchymal_Stem_Cell:Mesendoderm:Trophoblast-like_Cell:hESC	6.909e-10	rs1656374;rs9856753;rs1656374:rs9856753	25
ENSG00000118849	RARRES1	3	158414681	158450485	-1	protein_coding	5918	RARRES1	8.40652e-07	0.243737	10	2.975	422	4.26506e-20	7.10731e-32	TIGER/Nom_Alonso_Pancreatic_islets:EyeGEx:eQTLcatalogue/BrainSeq_ge_brain:eQTLcatalogue/CEDAR_rectum:eQTLcatalogue/CEDAR_transverse_colon:eQTLcatalogue/Fairfax_2014_IFN24:eQTLcatalogue/Fairfax_2014_LPS24:eQTLcatalogue/Fairfax_2014_LPS2:eQTLcatalogue/Nedelec_2016_ge_macrophage_Listeria:eQTLcatalogue/Nedelec_2016_ge_macrophage_naive:eQTLcatalogue/Nedelec_2016_ge_macrophage_Salmonella:PsychENCODE_eQ…	NA	Yes	Adult_Cortex:Fetal_Cortex:IMR90:Mesenchymal_Stem_Cell	6.346e-10	rs1656374;rs9856753	25
ENSG00000118855	MFSD1	3	158449987	158547508	1	protein_coding	64747	MFSD1	1.01997e-09	-0.113517	1	0.37	181	6.8451e-35	0	eQTLcatalogue/GEUVADIS_ge_LCL:PsychENCODE_eQTLs:eQTLGen_cis_eQTLs:BIOSQTL/BIOS_eQTL_geneLevel:GTEx/v8/Adipose_Subcutaneous:GTEx/v8/Adipose_Visceral_Omentum:GTEx/v8/Artery_Tibial:GTEx/v8/Esophagus_Mucosa:GTEx/v8/Muscle_Skeletal:GTEx/v8/Nerve_Tibial:GTEx/v8/Skin_Sun_Exposed_Lower_leg:GTEx/v8/Testis:GTEx/v8/Thyroid:GTEx/v7/Adipose_Subcutaneous:GTEx/v7/Adipose_Visceral_Omentum:GTEx/v7/Artery_Tibial:G…	NA	Yes	Adult_Cortex:Fetal_Cortex:IMR90:Mesenchymal_Stem_Cell	3.329e-09	rs1656374;rs9856753	25
ENSG00000250588	IQCJ-SCHIP1	3	158680024	159615155	1	protein_coding	100505385	IQCJ-SCHIP1	0.660502	0.0463226	0	0	1	NA	0.009	CMC_SVA_cis	NA	No	NA	0.0007395	rs1656374	25
ENSG00000035720	STAP1	4	68424446	68473055	1	protein_coding	26228	STAP1	0.00012955	-0.0698657	0	0	1	3.6615e-09	0.000106724	eQTLGen_trans_eQTLs	NA	No	NA	1.391e-05	rs9074	107
ENSG00000080493	SLC4A4	4	72053003	72437804	1	protein_coding	8671	SLC4A4	0.999996	-0.591823	0	0	1	6.9701e-06	0.0432361	eQTLGen_trans_eQTLs	NA	No	NA	0.03871	rs13054099	109
ENSG00000163291	PAQR3	4	79808281	79860592	-1	protein_coding	152559	PAQR3	0.0203917	2.08544	0	0	48	8.21755e-09	1.75485e-07	GTEx/v8/Esophagus_Gastroesophageal_Junction:GTEx/v8/Esophagus_Muscularis:GTEx/v7/Esophagus_Muscularis	NA	Yes	Mesendoderm:hESC	5.003e-09	rs1484145	27
ENSG00000156269	NAA11	4	80146848	80247204	-1	protein_coding	84779	NAA11	0.00282227	-0.177507	58	19.32	50	1.45634e-09	1.09849e-05	GTEx/v8/Esophagus_Muscularis:GTEx/v8/Testis:GTEx/v7/Testis	NA	No	NA	5.003e-09	rs1484145	27
ENSG00000163297	ANTXR2	4	80822303	81046608	-1	protein_coding	118429	ANTXR2	0.405189	-0.118939	0	0	19	3.42888e-06	0.00340279	GTEx/v8/Esophagus_Gastroesophageal_Junction:GTEx/v6/Cells_EBV-transformed_lymphocytes	NA	Yes	Mesenchymal_Stem_Cell:Mesendoderm:hESC	5.003e-09	rs1484145	27
ENSG00000152784	PRDM8	4	81105033	81125483	1	protein_coding	56978	PRDM8	NA	0.457538	0	0	7	9.89015e-05	0.0139374	GTEx/v8/Esophagus_Muscularis	NA	Yes	Mesenchymal_Stem_Cell:Mesendoderm:hESC	5.003e-09	rs1484145	27
ENSG00000138640	FAM13A	4	89647106	90032549	-1	protein_coding	10144	FAM13A	2.45411e-14	-0.13731	0	0	30	1.55345e-05	0.0345023	GTEx/v8/Adipose_Visceral_Omentum:GTEx/v7/Adipose_Visceral_Omentum	NA	No	NA	1.5e-09	rs1975488	28
ENSG00000145335	SNCA	4	90645250	90759466	-1	protein_coding	6622	SNCA	0.841962	-0.192397	0	0	96	2.8648e-56	0	eQTLcatalogue/CEDAR_monocyte_CD14:eQTLcatalogue/Fairfax_2014_IFN24:eQTLcatalogue/Fairfax_2014_LPS2:eQTLcatalogue/Fairfax_2014_naive:eQTLcatalogue/TwinsUK_ge_LCL:eQTLGen_cis_eQTLs:BIOSQTL/BIOS_eQTL_geneLevel:CMC_SVA_cis:GTEx/v8/Adipose_Subcutaneous:GTEx/v8/Artery_Aorta:GTEx/v8/Heart_Left_Ventricle:GTEx/v7/Heart_Left_Ventricle	NA	No	NA	3.283e-11	rs1975488	28
ENSG00000138722	MMRN1	4	90800683	90875780	1	protein_coding	22915	MMRN1	9.35082e-17	0.246502	13	6.791	129	1.51553e-25	0	EyeGEx:eQTLcatalogue/BLUEPRINT_ge_T-cell:eQTLcatalogue/Fairfax_2012_B-cell_CD19:eQTLcatalogue/GENCORD_ge_LCL:eQTLcatalogue/TwinsUK_ge_LCL:PsychENCODE_eQTLs:eQTLGen_cis_eQTLs:BIOSQTL/BIOS_eQTL_geneLevel:GTEx/v8/Adipose_Subcutaneous:GTEx/v8/Whole_Blood:GTEx/v8/Esophagus_Mucosa:GTEx/v8/Nerve_Tibial:GTEx/v8/Pituitary:GTEx/v8/Thyroid:GTEx/v7/Nerve_Tibial	NA	Yes	EP_correlation_cell_type_oneway:Mesendoderm:hESC	3.283e-11	rs1975488	28
ENSG00000184305	CCSER1	4	91048686	92523064	1	protein_coding	401145	CCSER1	0.211351	0.195161	29	15.06	24	4.38964e-12	2.19482e-08	eQTLcatalogue/BLUEPRINT_ge_monocyte:GTEx/v8/Nerve_Tibial	NA	Yes	EP_correlation_cell_type_oneway:Fetal_Cortex	1.473e-09	rs1975488	28
ENSG00000153064	BANK1	4	102332443	102995969	1	protein_coding	55024	BANK1	1.76433e-10	-0.305251	0	0	2	9.6337e-15	0	eQTLGen_trans_eQTLs	NA	No	NA	1.391e-05	rs301806;rs9074	0.115972
ENSG00000138795	LEF1	4	108968701	109090112	-1	protein_coding	51176	LEF1	0.970135	-0.536386	0	0	1	1.2667e-07	0.0013626	eQTLGen_trans_eQTLs	NA	No	NA	1.391e-05	rs9074	107
ENSG00000164111	ANXA5	4	122589110	122618268	-1	protein_coding	308	ANXA5	3.81588e-06	NA	0	0	3	4.5568e-09	3.23604e-05	eQTLGen_cis_eQTLs	NA	No	NA	0.000114	rs45510091	29
ENSG00000226757	AC079341.1	4	122685740	122687962	1	protein_coding	NA	NA	NA	NA	0	0	2	6.25611e-05	0.0426733	GTEx/v8/Esophagus_Muscularis	NA	Yes	IMR90	4.003e-10	rs45510091	29
ENSG00000123737	EXOSC9	4	122722472	122738176	1	protein_coding	5393	EXOSC9	1.87139e-06	0.205002	0	0	1	9.78342e-06	0.0489171	eQTLcatalogue/Naranbhai_2015_neutrophil_CD16	NA	Yes	Left_Ventricle:GM12878:IMR90:Mesenchymal_Stem_Cell:Mesendoderm:hESC	4.003e-10	rs45510091	29
ENSG00000138741	TRPC3	4	122800182	122872909	-1	protein_coding	7222	TRPC3	0.000446956	NA	0	0	2	1.5504e-05	0.00242488	eQTLGen_cis_eQTLs:GTEx/v8/Adipose_Subcutaneous	NA	Yes	Promoter_anchored_loops:Left_Ventricle:Liver:GM12878:IMR90:Mesenchymal_Stem_Cell:Mesendoderm:Neural_Progenitor_Cell:Trophoblast-like_Cell:hESC	4.003e-10	rs45510091	29
ENSG00000138688	KIAA1109	4	123073488	123283913	1	protein_coding	84162	KIAA1109	3.91298e-08	-0.835199	9	29.1	0	NA	NA	NA	NA	Yes	Left_Ventricle:IMR90:Mesenchymal_Stem_Cell:Mesendoderm:hESC	4.003e-10	rs45510091	29
ENSG00000164113	ADAD1	4	123300121	123350957	1	protein_coding	132612	ADAD1	0.974992	-0.43573	2	2.053	0	NA	NA	NA	NA	Yes	IMR90:Mesenchymal_Stem_Cell:Mesendoderm:hESC	4.003e-10	rs45510091	29
ENSG00000109471	IL2	4	123372625	123377880	-1	protein_coding	3558	IL2	0.784778	0.00596326	2	1.712	0	NA	NA	NA	NA	Yes	IMR90:Mesenchymal_Stem_Cell:Mesendoderm:hESC	4.003e-10	rs45510091	29
ENSG00000138684	IL21	4	123533783	123542224	-1	protein_coding	59067	IL21	0.502191	0.22488	3	2.153	0	NA	NA	NA	NA	Yes	Left_Ventricle:IMR90:Mesenchymal_Stem_Cell:Mesendoderm:Trophoblast-like_Cell:hESC	4.003e-10	rs45510091	29
ENSG00000138685	FGF2	4	123747863	123819391	1	protein_coding	2247	FGF2	NA	3.10041	0	0	1	4.50679e-06	0.022534	eQTLcatalogue/Fairfax_2012_B-cell_CD19	NA	Yes	Mesenchymal_Stem_Cell	NA	rs45510091	29
ENSG00000170917	NUDT6	4	123809852	123844123	-1	protein_coding	11162	NUDT6	0.000761662	0.00792765	0	0	7	7.47591e-06	0.0373795	eQTLcatalogue/Naranbhai_2015_neutrophil_CD16	NA	Yes	Fetal_Cortex:Left_Ventricle:GM12878:IMR90:Mesenchymal_Stem_Cell:Mesendoderm:Trophoblast-like_Cell:hESC	4.003e-10	rs45510091	29
ENSG00000151623	NR3C2	4	148999913	149365850	-1	protein_coding	4306	NR3C2	0.925089	-1.46444	0	0	2	2.1279e-07	0.00209616	eQTLGen_trans_eQTLs	NA	No	NA	0.0007836	rs13054099;rs5751069	109
ENSG00000151729	SLC25A4	4	186064395	186071536	1	protein_coding	291	SLC25A4	0.483364	NA	0	0	1	4.1049e-06	0.0281044	eQTLGen_trans_eQTLs	NA	No	NA	0.0007836	rs5751069	109
ENSG00000112941	PAPD7	5	6714718	6757161	1	protein_coding	11044	PAPD7	0.998369	-0.79889	0	0	4	2.0237e-21	0	eQTLGen_trans_eQTLs	NA	No	NA	1.527e-07	rs13054099;rs5751069	109
ENSG00000113361	CDH6	5	31193857	31329253	1	protein_coding	1004	CDH6	0.980835	-1.59815	0	0	2	2.78567e-06	2.92531e-06	GTEx/v8/Esophagus_Gastroesophageal_Junction:GTEx/v8/Esophagus_Muscularis:GTEx/v7/Esophagus_Muscularis	NA	Yes	Fetal_Cortex:Aorta:Left_Ventricle:Liver:Right_Ventricle:IMR90:Mesenchymal_Stem_Cell:Mesendoderm:Neural_Progenitor_Cell:Trophoblast-like_Cell:hESC	7.111e-09	rs12517438	31
ENSG00000188725	SMIM15	5	60453536	60458301	-1	protein_coding	643155	SMIM15	0.22832	-1.97118	0	0	5	2.28092e-05	0.0340481	GTEx/v6/Skin_Sun_Exposed_Lower_leg	NA	Yes	Left_Ventricle:Mesenchymal_Stem_Cell:Mesendoderm:Trophoblast-like_Cell:hESC	2.29e-09	rs10471540	32
ENSG00000068796	KIF2A	5	61601989	61833076	1	protein_coding	3796	KIF2A	0.99934	NA	104	16.34	177	9.8172e-58	0	EyeGEx:eQTLcatalogue/BLUEPRINT_ge_neutrophil:eQTLcatalogue/BLUEPRINT_ge_T-cell:eQTLcatalogue/GEUVADIS_ge_LCL:eQTLcatalogue/TwinsUK_ge_LCL:DICE/T_CD8_naive:DICE/T_CD4_TH1_17:eQTLGen_cis_eQTLs:BIOSQTL/BIOS_eQTL_geneLevel:GTEx/v8/Adipose_Subcutaneous:GTEx/v8/Adipose_Visceral_Omentum:GTEx/v8/Cells_EBV-transformed_lymphocytes:GTEx/v8/Artery_Aorta:GTEx/v8/Artery_Coronary:GTEx/v8/Artery_Tibial:GTEx/v8/B…	NA	Yes	Adult_Cortex:Fetal_Cortex	2.29e-09	rs10471540	32
ENSG00000086189	DIMT1	5	61683081	61699766	-1	protein_coding	27292	DIMT1	1.47118e-05	-0.237276	15	16.34	188	1.3762e-77	0	eQTLcatalogue/BLUEPRINT_ge_monocyte:eQTLcatalogue/BLUEPRINT_ge_T-cell:eQTLcatalogue/Fairfax_2014_LPS2:eQTLcatalogue/GEUVADIS_ge_LCL:eQTLcatalogue/HipSci_ge_iPSC:eQTLcatalogue/Lepik_2017_ge_blood:eQTLcatalogue/Quach_2016_ge_monocyte_LPS:eQTLcatalogue/Quach_2016_ge_monocyte_naive:eQTLcatalogue/Quach_2016_ge_monocyte_Pam3CSK4:eQTLcatalogue/Quach_2016_ge_monocyte_R848:eQTLcatalogue/TwinsUK_ge_skin:DI…	NA	Yes	Promoter_anchored_loops:Adult_Cortex:Fetal_Cortex:GM12878:IMR90:hESC	2.29e-09	rs10471540	32
ENSG00000086200	IPO11	5	61699799	61924409	1	protein_coding	51194	IPO11	0.996457	0.432792	83	16.34	158	2.5069e-47	0	EyeGEx:eQTLcatalogue/CEDAR_monocyte_CD14:eQTLcatalogue/TwinsUK_ge_fat:PsychENCODE_eQTLs:eQTLGen_cis_eQTLs:BIOSQTL/BIOS_eQTL_geneLevel:CMC_SVA_cis:GTEx/v8/Adrenal_Gland:GTEx/v8/Esophagus_Mucosa:GTEx/v8/Heart_Atrial_Appendage:GTEx/v8/Muscle_Skeletal:GTEx/v8/Cells_Cultured_fibroblasts:GTEx/v8/Skin_Sun_Exposed_Lower_leg:GTEx/v8/Testis:GTEx/v7/Heart_Left_Ventricle:GTEx/v7/Muscle_Skeletal:GTEx/v6/Adren…	NA	Yes	Promoter_anchored_loops:Adult_Cortex:Fetal_Cortex:GM12878:IMR90:hESC	2.29e-09	rs10471540	32
ENSG00000268942	CKS1B	5	61808070	61808309	-1	protein_coding	1163	NA	NA	-0.667052	2	1.685	0	NA	NA	NA	NA	Yes	IMR90:Mesenchymal_Stem_Cell:Mesendoderm:hESC	2.964e-05	rs10471540	32
ENSG00000186105	LRRC70	5	61874562	61877275	1	protein_coding	100130733	LRRC70	NA	0.0876016	5	5.974	27	1.611e-07	9.35969e-05	eQTLGen_cis_eQTLs:BIOSQTL/BIOS_eQTL_geneLevel:GTEx/v8/Thyroid	NA	Yes	IMR90:Mesenchymal_Stem_Cell:Mesendoderm:hESC	1.103e-08	rs10471540	32
ENSG00000131844	MCCC2	5	70883115	70954531	1	protein_coding	64087	MCCC2	4.09035e-08	-0.0564682	0	0	1	3.4673e-06	0.0245019	eQTLGen_trans_eQTLs	NA	No	NA	3.61e-09	rs10160510	77
ENSG00000145715	RASA1	5	86563705	86687748	1	protein_coding	5921	RASA1	0.999998	NA	0	0	19	1.0779e-05	7.11279e-10	GTEx/v8/Brain_Cerebellum:GTEx/v8/Colon_Sigmoid:GTEx/v8/Muscle_Skeletal:GTEx/v8/Nerve_Tibial:GTEx/v8/Skin_Sun_Exposed_Lower_leg	NA	Yes	Fetal_Cortex:GM12878:Mesendoderm:hESC	3.064e-13	rs3099439;rs3099439:rs6882046:rs194225:rs324901:rs3099439;rs4916661:rs4916661:rs11740836:rs12188167	33
ENSG00000134480	CCNH	5	86687311	86708836	-1	protein_coding	902	CCNH	0.00472976	-0.279835	0	0	12	6.83719e-06	0.0341859	eQTLcatalogue/GENCORD_ge_LCL	NA	Yes	Hippocampus:Left_Ventricle:IMR90:Mesenchymal_Stem_Cell:Mesendoderm:Neural_Progenitor_Cell:Trophoblast-like_Cell:hESC	1.734e-13	rs3099439;rs6882046:rs194225:rs3099439:rs11740836:rs3099439;rs4916661:rs12188167:rs3099439;rs11740836:rs324901:rs4916661:rs324901;rs4916661	33
ENSG00000164180	TMEM161B	5	87485450	87565293	-1	protein_coding	153396	TMEM161B	0.003685	0.0123156	57	14.41	220	1.98015e-61	0	TIGER/Nom_Alonso_Pancreatic_islets:EyeGEx:eQTLcatalogue/Alasoo_2018_ge_macrophage_IFNg_Salmonella:eQTLcatalogue/BLUEPRINT_ge_T-cell:eQTLcatalogue/Quach_2016_ge_monocyte_LPS:eQTLcatalogue/Quach_2016_ge_monocyte_Pam3CSK4:eQTLGen_cis_eQTLs:BIOSQTL/BIOS_eQTL_geneLevel:CMC_SVA_cis:GTEx/v8/Artery_Tibial:GTEx/v8/Brain_Cerebellum:GTEx/v8/Esophagus_Mucosa:GTEx/v8/Muscle_Skeletal:GTEx/v8/Cells_Cultured_fib…	NA	Yes	Adult_Cortex:Fetal_Cortex:Left_Ventricle:Liver:GM12878:IMR90:Mesenchymal_Stem_Cell:Mesendoderm:Neural_Progenitor_Cell:Trophoblast-like_Cell:hESC	2.875e-14	rs3099439;rs11740836;rs4916661;rs324901;rs12188167;rs194225;rs3099439:rs11740836:rs194225:rs6882046:rs3099439;rs4916661:rs3099439;rs11740836:rs12188167:rs324901:rs4916661:rs324901	33
ENSG00000081189	MEF2C	5	88013975	88199922	-1	protein_coding	4208	MEF2C	0.00424617	-2.66223	98	18.48	301	1.619e-213	0	EyeGEx:eQTLcatalogue/CEDAR_B-cell_CD19:eQTLcatalogue/CEDAR_monocyte_CD14:eQTLcatalogue/Fairfax_2014_IFN24:eQTLcatalogue/Fairfax_2014_naive:eQTLGen_cis_eQTLs:eQTLGen_trans_eQTLs:GTEx/v8/Brain_Cerebellar_Hemisphere:GTEx/v8/Brain_Cerebellum:GTEx/v8/Testis:GTEx/v7/Adipose_Subcutaneous:GTEx/v7/Breast_Mammary_Tissue	NA	Yes	Aorta:Dorsolateral_Prefrontal_Cortex:Hippocampus:Left_Ventricle:Liver:Psoas:Right_Ventricle:GM12878:IMR90:Mesenchymal_Stem_Cell:Mesendoderm:Neural_Progenitor_Cell:Trophoblast-like_Cell:hESC	6.682e-14	rs194225;rs6882046;rs324901;rs3099439;rs11740836;rs4916661;rs12188167;rs9074;rs6882046:rs194225:rs3099439:rs324901:rs12188167	33:107
ENSG00000175745	NR2F1	5	92919043	92930321	1	protein_coding	7025	NR2F1	NA	NA	8	19.4	1	NA	0.049	CMC_NoSVA_cis	NA	Yes	Promoter_anchored_loops:IMR90:Mesenchymal_Stem_Cell:Mesendoderm:hESC	1.155e-09	rs10061069;rs17083315:rs10061069:rs17083315	34
ENSG00000113391	FAM172A	5	92953775	93447404	-1	protein_coding	83989	FAM172A	0.0182871	-0.651395	238	19.69	266	1.6049e-57	0	eQTLcatalogue/CEDAR_T-cell_CD4:eQTLcatalogue/CEDAR_transverse_colon:eQTLcatalogue/Fairfax_2012_B-cell_CD19:eQTLcatalogue/Fairfax_2014_IFN24:eQTLcatalogue/Fairfax_2014_naive:eQTLcatalogue/Quach_2016_ge_monocyte_Pam3CSK4:eQTLcatalogue/Quach_2016_ge_monocyte_R848:PsychENCODE_eQTLs:eQTLGen_cis_eQTLs:BIOSQTL/BIOS_eQTL_geneLevel:CMC_SVA_cis:GTEx/v8/Artery_Tibial:GTEx/v8/Esophagus_Mucosa:GTEx/v8/Skin_No…	NA	Yes	Promoter_anchored_loops	2.076e-10	rs10061069;rs17083315	34
ENSG00000248483	POU5F2	5	93070508	93077343	-1	protein_coding	134187	POU5F2	0.00100875	-0.448785	18	15.17	51	3.79361e-08	4.53078e-05	BIOSQTL/BIOS_eQTL_geneLevel	NA	Yes	Left_Ventricle:IMR90:Mesenchymal_Stem_Cell:Mesendoderm:hESC	2.076e-10	rs10061069;rs17083315;rs10061069:rs10061069;rs17083315:rs17083315	34
ENSG00000185261	KIAA0825	5	93488671	93954309	-1	protein_coding	285600	KIAA0825	4.2615e-07	-0.910429	8	15.2	0	NA	NA	NA	NA	Yes	Fetal_Cortex:Left_Ventricle:GM12878:IMR90:Mesenchymal_Stem_Cell:Mesendoderm:hESC	2.076e-10	rs10061069;rs17083315;rs10061069:rs17083315:rs10061069	34
ENSG00000184838	PRR16	5	119799973	120023027	1	protein_coding	51334	PRR16	0.526199	-0.167736	18	14.9	31	2.90129e-07	0.00145064	eQTLcatalogue/HipSci_ge_iPSC:PsychENCODE_eQTLs:CMC_SVA_cis:CMC_NoSVA_cis	NA	Yes	IMR90:Mesenchymal_Stem_Cell:Mesendoderm:hESC	8.079e-10	rs62379856;rs62379856:rs62379856;rs7379967:rs7379967	36
ENSG00000043143	JADE2	5	133860003	133918918	1	protein_coding	23338	JADE2	0.99931	-1.34998	0	0	2	NA	0.049	CMC_SVA_trans	NA	No	NA	2.231e-06	rs56072039	60
ENSG00000185129	PURA	5	139487362	139496321	1	protein_coding	5813	PURA	0.845099	-0.961083	0	0	49	0.00125257	0.0265946	BRAINEAC/THAL	NA	Yes	Promoter_anchored_loops	2.039e-07	rs3756334	37
ENSG00000182700	IGIP	5	139505521	139508391	1	protein_coding	492311	IGIP	0.419919	-1.73824	0	0	6	2.84133e-06	0.013858	GTEx/v6/Brain_Nucleus_accumbens_basal_ganglia	NA	No	NA	0.001606	rs3756334	37
ENSG00000120306	CYSTM1	5	139554227	139661637	1	protein_coding	84418	CYSTM1	0.284309	-0.813371	0	0	92	4.40178e-06	2.13776e-28	PsychENCODE_eQTLs:eQTLGen_cis_eQTLs:GTEx/v8/Artery_Tibial:GTEx/v8/Brain_Cerebellum:GTEx/v8/Brain_Cortex:GTEx/v7/Thyroid	NA	Yes	Promoter_anchored_loops	3.335e-08	rs3756334	37
ENSG00000113068	PFDN1	5	139624624	139682706	-1	protein_coding	5201	PFDN1	0.805475	0.153288	0	0	176	3.96156e-16	2.1251e-156	eQTLGen_cis_eQTLs:GTEx/v8/Adipose_Visceral_Omentum:GTEx/v8/Adrenal_Gland:GTEx/v8/Artery_Aorta:GTEx/v8/Artery_Tibial:GTEx/v8/Breast_Mammary_Tissue:GTEx/v8/Colon_Sigmoid:GTEx/v8/Esophagus_Gastroesophageal_Junction:GTEx/v8/Heart_Atrial_Appendage:GTEx/v8/Heart_Left_Ventricle:GTEx/v8/Liver:GTEx/v8/Muscle_Skeletal:GTEx/v8/Cells_Cultured_fibroblasts:GTEx/v8/Skin_Not_Sun_Exposed_Suprapubic:GTEx/v8/Skin_S…	NA	Yes	Adult_Cortex:Fetal_Cortex:Mesenchymal_Stem_Cell	3.335e-08	rs3756334	37
ENSG00000113070	HBEGF	5	139712428	139726216	-1	protein_coding	1839	HBEGF	0.830814	0.319757	0	0	104	3.3981e-13	0	eQTLGen_cis_eQTLs	NA	Yes	Spleen:GM12878:IMR90:Mesenchymal_Stem_Cell:Mesendoderm:Trophoblast-like_Cell	3.335e-08	rs3756334	37
ENSG00000113073	SLC4A9	5	139739787	139754728	1	protein_coding	83697	SLC4A9	5.6907e-18	0.0679009	0	0	203	1.61848e-21	8.85531e-20	GTEx/v8/Lung:GTEx/v8/Skin_Not_Sun_Exposed_Suprapubic:GTEx/v8/Testis:GTEx/v8/Thyroid:GTEx/v7/Testis:GTEx/v7/Thyroid:GTEx/v6/Thyroid	NA	Yes	Promoter_anchored_loops:Fetal_Cortex:Spleen:GM12878:IMR90:Mesenchymal_Stem_Cell:Mesendoderm:Trophoblast-like_Cell	3.335e-08	rs3756334	37
ENSG00000131503	ANKHD1	5	139781399	139929163	1	protein_coding	404734	ANKHD1	1	-0.720499	2	3.158	39	3.46638e-06	0.00463775	eQTLcatalogue/Fairfax_2014_IFN24:eQTLcatalogue/TwinsUK_ge_fat:BIOSQTL/BIOS_eQTL_geneLevel:CMC_NoSVA_cis:GTEx/v8/Testis	NA	Yes	Promoter_anchored_loops:Adult_Cortex:Fetal_Cortex:Liver:GM12878:IMR90:Mesenchymal_Stem_Cell	2.039e-07	rs3756334	37
ENSG00000254996	ANKHD1-EIF4EBP3	5	139781493	139929154	1	protein_coding	404734	ANKHD1-EIF4EBP3	1	-0.658995	2	3.158	120	1.17271e-05	0.00794271	EyeGEx:BIOSQTL/BIOS_eQTL_geneLevel:CMC_SVA_cis	NA	Yes	Promoter_anchored_loops:Adult_Cortex:Fetal_Cortex:Liver:GM12878:IMR90:Mesenchymal_Stem_Cell	3.335e-08	rs3756334	37
ENSG00000213523	SRA1	5	139916925	139937895	-1	protein_coding	10011	SRA1	5.00128e-06	-0.871643	0	0	231	5.0491e-195	0	EyeGEx:eQTLcatalogue/Alasoo_2018_ge_macrophage_IFNg:eQTLcatalogue/Alasoo_2018_ge_macrophage_naive:eQTLcatalogue/CEDAR_monocyte_CD14:eQTLcatalogue/CEDAR_T-cell_CD4:eQTLcatalogue/CEDAR_T-cell_CD8:eQTLcatalogue/Fairfax_2014_IFN24:eQTLcatalogue/Fairfax_2014_LPS24:eQTLcatalogue/Fairfax_2014_LPS2:eQTLcatalogue/Fairfax_2014_naive:eQTLcatalogue/HipSci_ge_iPSC:eQTLcatalogue/Lepik_2017_ge_blood:eQTLcatalog…	NA	Yes	Promoter_anchored_loops:Adult_Cortex:Fetal_Cortex:Left_Ventricle:Liver:Spleen:GM12878:IMR90:Mesenchymal_Stem_Cell:Mesendoderm:Trophoblast-like_Cell:hESC	3.335e-08	rs3756334	37
ENSG00000243056	EIF4EBP3	5	139927251	139929163	1	protein_coding	8637	EIF4EBP3	0.054243	-0.32606	0	0	119	1.0741e-11	0	PsychENCODE_eQTLs:eQTLGen_cis_eQTLs:BIOSQTL/BIOS_eQTL_geneLevel:GTEx/v8/Adipose_Subcutaneous:GTEx/v8/Brain_Cortex:GTEx/v8/Brain_Frontal_Cortex_BA9:GTEx/v8/Brain_Nucleus_accumbens_basal_ganglia:GTEx/v8/Breast_Mammary_Tissue:GTEx/v8/Colon_Transverse:GTEx/v8/Esophagus_Mucosa:GTEx/v8/Heart_Atrial_Appendage:GTEx/v8/Muscle_Skeletal:GTEx/v8/Nerve_Tibial:GTEx/v8/Pancreas:GTEx/v8/Cells_Cultured_fibroblast…	NA	Yes	Promoter_anchored_loops:Adult_Cortex:Fetal_Cortex:Left_Ventricle:Liver:Spleen:GM12878:IMR90:Mesenchymal_Stem_Cell:Mesendoderm:Trophoblast-like_Cell:hESC	3.335e-08	rs3756334	37
ENSG00000113108	APBB3	5	139937853	139973337	-1	protein_coding	102465499	APBB3	1.54051e-05	-0.650382	3	2.824	213	5.1773e-86	0	eQTLcatalogue/Alasoo_2018_ge_macrophage_IFNg:eQTLcatalogue/Alasoo_2018_ge_macrophage_naive:eQTLcatalogue/Fairfax_2014_LPS2:eQTLcatalogue/Fairfax_2014_naive:eQTLGen_cis_eQTLs:BIOSQTL/BIOS_eQTL_geneLevel	NA	Yes	Liver:IMR90:Mesenchymal_Stem_Cell:Mesendoderm:hESC	3.335e-08	rs3756334	37
ENSG00000176087	SLC35A4	5	139944041	139948688	1	protein_coding	113829	SLC35A4	0.000744269	-0.475951	0	0	199	1.1474e-118	0	eQTLcatalogue/Alasoo_2018_ge_macrophage_IFNg:eQTLcatalogue/Alasoo_2018_ge_macrophage_naive:eQTLcatalogue/BLUEPRINT_ge_monocyte:eQTLcatalogue/Fairfax_2014_IFN24:eQTLcatalogue/Fairfax_2014_LPS24:eQTLcatalogue/Fairfax_2014_naive:eQTLGen_cis_eQTLs:BIOSQTL/BIOS_eQTL_geneLevel:GTEx/v8/Cells_EBV-transformed_lymphocytes:GTEx/v8/Whole_Blood:GTEx/v8/Esophagus_Muscularis:GTEx/v7/Whole_Blood:GTEx/v6/Whole_Bl…	NA	Yes	Promoter_anchored_loops:Adult_Cortex:Fetal_Cortex:Left_Ventricle:Liver:Spleen:GM12878:IMR90:Mesenchymal_Stem_Cell:Mesendoderm:Trophoblast-like_Cell:hESC	3.335e-08	rs3756334	37
ENSG00000170458	CD14	5	140011313	140013286	-1	protein_coding	929	CD14	6.68637e-05	0.811868	12	11.83	208	3.068e-302	0	TIGER/Nom_Alonso_Pancreatic_islets:eQTLcatalogue/Alasoo_2018_ge_macrophage_IFNg_Salmonella:eQTLcatalogue/Alasoo_2018_ge_macrophage_IFNg:eQTLcatalogue/Alasoo_2018_ge_macrophage_naive:eQTLcatalogue/Alasoo_2018_ge_macrophage_Salmonella:eQTLcatalogue/Schwartzentruber_2018_ge_sensory_neuron:PsychENCODE_eQTLs:eQTLGen_cis_eQTLs:BIOSQTL/BIOS_eQTL_geneLevel:CMC_SVA_cis:GTEx/v8/Adipose_Subcutaneous:GTEx/v8…	NA	Yes	Liver:GM12878:IMR90:Mesenchymal_Stem_Cell:Mesendoderm:Trophoblast-like_Cell:hESC	3.335e-08	rs3756334	37
ENSG00000131495	NDUFA2	5	140018325	140027370	-1	protein_coding	4695	NDUFA2	0.339537	-0.162257	19	10.79	239	3.9543e-269	0	TIGER/Nom_Alonso_Pancreatic_islets:EyeGEx:eQTLcatalogue/Alasoo_2018_ge_macrophage_IFNg_Salmonella:eQTLcatalogue/Alasoo_2018_ge_macrophage_IFNg:eQTLcatalogue/Alasoo_2018_ge_macrophage_naive:eQTLcatalogue/Alasoo_2018_ge_macrophage_Salmonella:eQTLcatalogue/BLUEPRINT_ge_monocyte:eQTLcatalogue/BLUEPRINT_ge_neutrophil:eQTLcatalogue/CEDAR_neutrophil_CD15:eQTLcatalogue/Fairfax_2012_B-cell_CD19:eQTLcatalo…	NA	Yes	Promoter_anchored_loops:Adult_Cortex:Fetal_Cortex:Liver:GM12878:IMR90:Mesenchymal_Stem_Cell:Mesendoderm:Trophoblast-like_Cell:hESC	3.335e-08	rs3756334	37
ENSG00000113119	TMCO6	5	140019012	140024993	1	protein_coding	55374	TMCO6	8.14596e-06	-0.195922	17	10.79	226	3.7013e-74	0	EyeGEx:eQTLcatalogue/Alasoo_2018_ge_macrophage_IFNg:eQTLcatalogue/Alasoo_2018_ge_macrophage_naive:eQTLcatalogue/BLUEPRINT_ge_monocyte:eQTLcatalogue/BLUEPRINT_ge_T-cell:eQTLcatalogue/Lepik_2017_ge_blood:eQTLcatalogue/Quach_2016_ge_monocyte_Pam3CSK4:eQTLcatalogue/TwinsUK_ge_fat:eQTLcatalogue/TwinsUK_ge_LCL:DICE/Monocyte_classical:DICE/T_CD4_TH1:DICE/T_CD4_TH17:DICE/T_CD4_TH2:DICE/T_CD4_memory_TREG:…	NA	Yes	Liver:GM12878:IMR90:Mesenchymal_Stem_Cell:Mesendoderm:Trophoblast-like_Cell:hESC	3.335e-08	rs3756334	37
ENSG00000113141	IK	5	140026643	140042064	1	protein_coding	3550	IK	3.47058e-06	0.686068	22	24.3	235	3.5957e-174	0	EyeGEx:eQTLcatalogue/Fairfax_2014_IFN24:eQTLcatalogue/GENCORD_ge_LCL:eQTLcatalogue/Lepik_2017_ge_blood:eQTLcatalogue/Quach_2016_ge_monocyte_IAV:eQTLcatalogue/Quach_2016_ge_monocyte_LPS:eQTLcatalogue/Quach_2016_ge_monocyte_naive:eQTLcatalogue/Quach_2016_ge_monocyte_Pam3CSK4:eQTLcatalogue/Quach_2016_ge_monocyte_R848:eQTLcatalogue/TwinsUK_ge_fat:eQTLcatalogue/TwinsUK_ge_LCL:PsychENCODE_eQTLs:DICE/B_…	NA	Yes	Promoter_anchored_loops:Adult_Cortex:Fetal_Cortex:Liver:GM12878:IMR90:Mesenchymal_Stem_Cell:Mesendoderm:Trophoblast-like_Cell:hESC	3.335e-08	rs3756334	37
ENSG00000120314	WDR55	5	140044261	140053709	1	protein_coding	54853	WDR55	1.48299e-06	-1.03752	16	24.3	241	3.27167000000001e-310	0	eQTLcatalogue/Alasoo_2018_ge_macrophage_naive:eQTLcatalogue/CEDAR_monocyte_CD14:eQTLcatalogue/CEDAR_rectum:eQTLcatalogue/CEDAR_T-cell_CD4:eQTLcatalogue/CEDAR_T-cell_CD8:eQTLcatalogue/CEDAR_transverse_colon:eQTLcatalogue/Fairfax_2012_B-cell_CD19:eQTLcatalogue/Fairfax_2014_IFN24:eQTLcatalogue/Fairfax_2014_LPS24:eQTLcatalogue/Fairfax_2014_LPS2:eQTLcatalogue/Fairfax_2014_naive:eQTLcatalogue/Kasela_20…	NA	Yes	Adult_Cortex:Fetal_Cortex:GM12878:IMR90:Mesenchymal_Stem_Cell:Mesendoderm:Trophoblast-like_Cell:hESC	3.335e-08	rs3756334	37
ENSG00000256453	DND1	5	140050379	140053171	-1	protein_coding	373863	DND1	0.709666	-0.434619	13	24.3	149	3.27167000000001e-310	0	Nom_InsPIRE_Islets_Gene_eQTLs_Nominal_Pvalues:eQTLcatalogue/HipSci_ge_iPSC:BIOSQTL/BIOS_eQTL_geneLevel:xQTLServer_eQTLs	NA	Yes	Adult_Cortex:Fetal_Cortex:GM12878:IMR90:Mesenchymal_Stem_Cell:Mesendoderm:Trophoblast-like_Cell:hESC	3.335e-08	rs3756334	37
ENSG00000170445	HARS	5	140052758	140071609	-1	protein_coding	101928623	HARS	0.000736051	-1.34214	33	24.3	194	3.27167000000001e-310	0	BIOSQTL/BIOS_eQTL_geneLevel:GTEx/v8/Whole_Blood:GTEx/v8/Brain_Cerebellar_Hemisphere:GTEx/v8/Brain_Cerebellum:GTEx/v8/Brain_Cortex:GTEx/v8/Brain_Nucleus_accumbens_basal_ganglia:GTEx/v8/Nerve_Tibial:GTEx/v8/Testis:GTEx/v8/Thyroid:GTEx/v7/Brain_Cerebellar_Hemisphere:GTEx/v7/Brain_Cerebellum:GTEx/v7/Brain_Hypothalamus:GTEx/v7/Brain_Nucleus_accumbens_basal_ganglia:GTEx/v7/Nerve_Tibial:GTEx/v7/Thyroid:…	NA	Yes	Adult_Cortex:Fetal_Cortex:GM12878:IMR90:Mesenchymal_Stem_Cell:Mesendoderm:Trophoblast-like_Cell:hESC	3.335e-08	rs3756334	37
ENSG00000112855	HARS2	5	140071011	140078889	1	protein_coding	23438	HARS2	8.12768e-05	-0.908738	35	6.592	218	3.0334e-44	0	TIGER/Nom_Alonso_Pancreatic_islets:eQTLcatalogue/Kasela_2017_T-cell_CD4:eQTLcatalogue/Lepik_2017_ge_blood:PsychENCODE_eQTLs:DICE/T_CD4_naive:DICE/Monocyte_non_classical:DICE/T_CD4_TH1_17:DICE/T_CD4_TH2:eQTLGen_cis_eQTLs:BIOSQTL/BIOS_eQTL_geneLevel:GTEx/v8/Brain_Caudate_basal_ganglia:GTEx/v8/Colon_Transverse:GTEx/v8/Esophagus_Muscularis:GTEx/v8/Heart_Left_Ventricle:GTEx/v8/Muscle_Skeletal:GTEx/v8/…	NA	Yes	Adult_Cortex:Fetal_Cortex:GM12878:IMR90:Mesenchymal_Stem_Cell:Mesendoderm:Trophoblast-like_Cell:hESC	3.335e-08	rs3756334	37
ENSG00000146007	ZMAT2	5	140078265	140086248	1	protein_coding	153527	ZMAT2	0.971434	-0.225028	30	8.905	239	1.4147e-204	0	TIGER/Nom_Alonso_Pancreatic_islets:EyeGEx:eQTLcatalogue/BLUEPRINT_ge_monocyte:eQTLcatalogue/BLUEPRINT_ge_neutrophil:eQTLcatalogue/BrainSeq_ge_brain:eQTLcatalogue/CEDAR_neutrophil_CD15:eQTLcatalogue/Fairfax_2012_B-cell_CD19:eQTLcatalogue/Fairfax_2014_naive:eQTLcatalogue/GENCORD_ge_LCL:eQTLcatalogue/GEUVADIS_ge_LCL:eQTLcatalogue/Lepik_2017_ge_blood:eQTLcatalogue/Naranbhai_2015_neutrophil_CD16:eQTLc…	NA	Yes	Adult_Cortex:Fetal_Cortex:GM12878:IMR90:Mesenchymal_Stem_Cell:Mesendoderm:Trophoblast-like_Cell:hESC	3.335e-08	rs3756334	37
ENSG00000204970	PCDHA1	5	140165876	140391929	1	protein_coding	56147	PCDHA1	0.000559475	-0.840725	105	25.9	209	7.87809e-16	2.06381e-11	TIGER/Nom_Alonso_Pancreatic_islets:eQTLcatalogue/BrainSeq_ge_brain:BRAINEAC/WHMT:GTEx/v8/Brain_Cerebellar_Hemisphere:GTEx/v8/Brain_Cerebellum:GTEx/v8/Pancreas:GTEx/v8/Pituitary:GTEx/v8/Testis:GTEx/v7/Brain_Cerebellar_Hemisphere:GTEx/v7/Brain_Cerebellum:GTEx/v7/Pancreas:GTEx/v7/Pituitary:GTEx/v7/Testis:GTEx/v6/Brain_Cerebellar_Hemisphere:GTEx/v6/Brain_Cerebellum:GTEx/v6/Pituitary	NA	Yes	Promoter_anchored_loops	3.335e-08	rs3756334	37
ENSG00000204969	PCDHA2	5	140174444	140391929	1	protein_coding	56146	PCDHA2	1.98581e-09	-0.824134	99	25.9	209	2.97954e-21	1.80217e-18	TIGER/Nom_Alonso_Pancreatic_islets:PsychENCODE_eQTLs:CMC_SVA_cis:CMC_NoSVA_cis:BRAINEAC/WHMT:GTEx/v8/Brain_Cerebellum:GTEx/v8/Brain_Frontal_Cortex_BA9:GTEx/v8/Pancreas:GTEx/v8/Pituitary:GTEx/v8/Skin_Not_Sun_Exposed_Suprapubic:GTEx/v8/Testis:GTEx/v7/Brain_Cerebellum:GTEx/v7/Colon_Transverse:GTEx/v7/Esophagus_Muscularis:GTEx/v7/Pancreas:GTEx/v7/Pituitary:GTEx/v6/Brain_Cerebellum:GTEx/v6/Pancreas	NA	Yes	Promoter_anchored_loops	3.335e-08	rs3756334	37
ENSG00000255408	PCDHA3	5	140180783	140391929	1	protein_coding	56146	PCDHA3	1.46197e-13	0.00212253	95	25.9	206	1.13026e-11	8.39235e-09	PsychENCODE_eQTLs:CMC_NoSVA_cis:GTEx/v8/Adipose_Subcutaneous:GTEx/v8/Artery_Tibial:GTEx/v8/Brain_Cerebellar_Hemisphere:GTEx/v8/Brain_Cerebellum:GTEx/v8/Colon_Transverse:GTEx/v8/Esophagus_Gastroesophageal_Junction:GTEx/v8/Esophagus_Muscularis:GTEx/v8/Nerve_Tibial:GTEx/v8/Pancreas:GTEx/v8/Pituitary:GTEx/v8/Prostate:GTEx/v8/Cells_Cultured_fibroblasts:GTEx/v8/Skin_Not_Sun_Exposed_Suprapubic:GTEx/v7/A…	NA	No	NA	3.335e-08	rs3756334	37
ENSG00000204967	PCDHA4	5	140186659	140391929	1	protein_coding	56144	PCDHA4	2.87537e-15	-0.622279	89	25.9	237	3.04481e-24	1.13182e-18	TIGER/Nom_Alonso_Pancreatic_islets:eQTLcatalogue/Alasoo_2018_ge_macrophage_naive:eQTLcatalogue/HipSci_ge_iPSC:PsychENCODE_eQTLs:CMC_SVA_cis:CMC_NoSVA_cis:BRAINEAC/WHMT:GTEx/v8/Adipose_Visceral_Omentum:GTEx/v8/Artery_Aorta:GTEx/v8/Artery_Coronary:GTEx/v8/Artery_Tibial:GTEx/v8/Brain_Caudate_basal_ganglia:GTEx/v8/Brain_Spinal_cord_cervical_c-1:GTEx/v8/Breast_Mammary_Tissue:GTEx/v8/Colon_Transverse:G…	NA	No	NA	3.335e-08	rs3756334	37
ENSG00000204965	PCDHA5	5	140201222	140391929	1	protein_coding	56143	PCDHA5	0.00353825	-0.181196	69	23.3	190	6.85073e-11	4.1351e-07	PsychENCODE_eQTLs:BRAINEAC/WHMT:GTEx/v8/Adipose_Subcutaneous:GTEx/v8/Adipose_Visceral_Omentum:GTEx/v8/Artery_Aorta:GTEx/v8/Esophagus_Gastroesophageal_Junction:GTEx/v8/Lung:GTEx/v8/Nerve_Tibial:GTEx/v8/Pancreas:GTEx/v8/Skin_Not_Sun_Exposed_Suprapubic:GTEx/v8/Thyroid:GTEx/v7/Artery_Aorta:GTEx/v7/Lung:GTEx/v7/Pancreas:GTEx/v7/Thyroid:GTEx/v6/Pancreas	NA	Yes	Promoter_anchored_loops	3.335e-08	rs3756334	37
ENSG00000081842	PCDHA6	5	140207563	140391929	1	protein_coding	56142	PCDHA6	6.16175e-08	-0.972356	62	23.3	146	1.1895e-12	3.54548e-10	TIGER/Nom_Alonso_Pancreatic_islets:PsychENCODE_eQTLs:GTEx/v8/Pancreas:GTEx/v8/Skin_Sun_Exposed_Lower_leg	NA	Yes	Promoter_anchored_loops	3.335e-08	rs3756334	37
ENSG00000204963	PCDHA7	5	140213969	140391929	1	protein_coding	56141	PCDHA7	0.000137152	-0.427091	60	23.3	238	2.14706e-41	3.43741e-38	TIGER/Nom_Alonso_Pancreatic_islets:EyeGEx:eQTLcatalogue/BrainSeq_ge_brain:eQTLcatalogue/HipSci_ge_iPSC:PsychENCODE_eQTLs:CMC_SVA_cis:CMC_NoSVA_cis:BRAINEAC/WHMT:GTEx/v8/Adipose_Subcutaneous:GTEx/v8/Adipose_Visceral_Omentum:GTEx/v8/Artery_Aorta:GTEx/v8/Artery_Tibial:GTEx/v8/Brain_Cerebellar_Hemisphere:GTEx/v8/Brain_Cerebellum:GTEx/v8/Brain_Cortex:GTEx/v8/Brain_Frontal_Cortex_BA9:GTEx/v8/Brain_Hypo…	NA	Yes	Promoter_anchored_loops	3.335e-08	rs3756334	37
ENSG00000204962	PCDHA8	5	140220907	140391929	1	protein_coding	56140	PCDHA8	3.7012e-10	-0.652196	58	23.3	238	3.04076e-52	7.21413e-49	EyeGEx:eQTLcatalogue/BrainSeq_ge_brain:PsychENCODE_eQTLs:CMC_SVA_cis:CMC_NoSVA_cis:BRAINEAC/WHMT:GTEx/v8/Brain_Cerebellar_Hemisphere:GTEx/v8/Brain_Cerebellum:GTEx/v8/Brain_Cortex:GTEx/v8/Brain_Frontal_Cortex_BA9:GTEx/v8/Pituitary:GTEx/v8/Testis:GTEx/v7/Brain_Cerebellar_Hemisphere:GTEx/v7/Brain_Cerebellum:GTEx/v7/Brain_Frontal_Cortex_BA9:GTEx/v7/Testis	NA	Yes	Promoter_anchored_loops	3.335e-08	rs3756334	37
ENSG00000204961	PCDHA9	5	140227048	140391929	1	protein_coding	9752	PCDHA9	7.88939e-14	-0.676834	51	23.3	240	9.74012e-45	1.77815e-41	TIGER/Nom_Alonso_Pancreatic_islets:EyeGEx:eQTLcatalogue/BrainSeq_ge_brain:PsychENCODE_eQTLs:CMC_SVA_cis:CMC_NoSVA_cis:BRAINEAC/WHMT:GTEx/v8/Brain_Anterior_cingulate_cortex_BA24:GTEx/v8/Brain_Cerebellar_Hemisphere:GTEx/v8/Brain_Cerebellum:GTEx/v8/Brain_Cortex:GTEx/v8/Brain_Frontal_Cortex_BA9:GTEx/v8/Brain_Nucleus_accumbens_basal_ganglia:GTEx/v8/Testis:GTEx/v7/Brain_Anterior_cingulate_cortex_BA24:G…	NA	Yes	Promoter_anchored_loops	3.335e-08	rs3756334	37
ENSG00000250120	PCDHA10	5	140235595	140391929	1	protein_coding	56139	PCDHA10	4.18272e-11	-0.910087	40	17	237	1.27984e-61	3.97804e-58	TIGER/Nom_Alonso_Pancreatic_islets:EyeGEx:eQTLcatalogue/BrainSeq_ge_brain:eQTLcatalogue/HipSci_ge_iPSC:PsychENCODE_eQTLs:CMC_SVA_cis:CMC_NoSVA_cis:GTEx/v8/Adipose_Subcutaneous:GTEx/v8/Adipose_Visceral_Omentum:GTEx/v8/Artery_Tibial:GTEx/v8/Brain_Anterior_cingulate_cortex_BA24:GTEx/v8/Brain_Caudate_basal_ganglia:GTEx/v8/Brain_Cortex:GTEx/v8/Brain_Frontal_Cortex_BA9:GTEx/v8/Brain_Nucleus_accumbens_b…	NA	No	NA	3.335e-08	rs3756334	37
ENSG00000249034	AC005609.1	5	140240341	140243224	-1	protein_coding	NA	NA	NA	NA	3	17	31	1.91022e-07	0.000977302	PsychENCODE_eQTLs:GTEx/v7/Brain_Cerebellum:GTEx/v6/Brain_Cerebellar_Hemisphere:GTEx/v6/Brain_Cerebellum	NA	Yes	Mesenchymal_Stem_Cell:Mesendoderm:hESC	3.335e-08	rs3756334	37
ENSG00000249158	PCDHA11	5	140248689	140391929	1	protein_coding	56138	PCDHA11	3.59325e-10	-0.641249	37	16.97	215	1.08089e-33	4.09732e-28	EyeGEx:PsychENCODE_eQTLs:CMC_SVA_cis:CMC_NoSVA_cis:GTEx/v8/Brain_Cerebellum:GTEx/v8/Nerve_Tibial:GTEx/v8/Testis:GTEx/v8/Thyroid:GTEx/v7/Testis:GTEx/v6/Testis	NA	Yes	Mesenchymal_Stem_Cell:Mesendoderm:hESC	3.335e-08	rs3756334	37
ENSG00000251664	PCDHA12	5	140255058	140391929	1	protein_coding	56137	PCDHA12	3.51763e-10	-0.630755	37	16.97	99	9.49122e-16	3.76333e-13	TIGER/Nom_Alonso_Pancreatic_islets:EyeGEx:PsychENCODE_eQTLs:CMC_SVA_cis:CMC_NoSVA_cis:GTEx/v8/Testis	NA	Yes	Mesenchymal_Stem_Cell:Mesendoderm:hESC	3.335e-08	rs3756334	37
ENSG00000239389	PCDHA13	5	140261793	140391929	1	protein_coding	56138	PCDHA13	4.28547e-11	-0.705577	36	16.72	239	5.96418e-110	5.79272e-106	TIGER/Nom_Alonso_Pancreatic_islets:EyeGEx:eQTLcatalogue/BrainSeq_ge_brain:PsychENCODE_eQTLs:CMC_SVA_cis:CMC_NoSVA_cis:GTEx/v8/Adipose_Subcutaneous:GTEx/v8/Adrenal_Gland:GTEx/v8/Brain_Amygdala:GTEx/v8/Brain_Anterior_cingulate_cortex_BA24:GTEx/v8/Brain_Caudate_basal_ganglia:GTEx/v8/Brain_Cerebellar_Hemisphere:GTEx/v8/Brain_Cerebellum:GTEx/v8/Brain_Cortex:GTEx/v8/Brain_Frontal_Cortex_BA9:GTEx/v8/Bra…	NA	Yes	Mesenchymal_Stem_Cell:Mesendoderm:hESC	3.335e-08	rs3756334	37
ENSG00000248383	PCDHAC1	5	140306302	140391929	1	protein_coding	56135	PCDHAC1	4.57699e-09	-1.07308	31	16.72	182	3.21758e-25	1.60879e-21	TIGER/Nom_Alonso_Pancreatic_islets:eQTLcatalogue/TwinsUK_ge_fat:CMC_NoSVA_cis:BRAINEAC/WHMT:GTEx/v8/Adipose_Subcutaneous:GTEx/v8/Thyroid:GTEx/v7/Adipose_Subcutaneous	NA	Yes	Promoter_anchored_loops	3.335e-08	rs3756334	37
ENSG00000243232	PCDHAC2	5	140345820	140391936	1	protein_coding	56134	PCDHAC2	0.916966	-1.20364	5	14.64	150	9.11207e-17	4.05842e-12	CMC_SVA_cis:GTEx/v8/Spleen:GTEx/v8/Thyroid:GTEx/v7/Spleen:GTEx/v6/Spleen	NA	Yes	Mesenchymal_Stem_Cell:Mesendoderm:hESC	3.335e-08	rs3756334	37
ENSG00000112852	PCDHB2	5	140474227	140476962	1	protein_coding	56133	PCDHB2	NA	0.158707	0	0	27	4.31697e-05	1.27467e-06	PsychENCODE_eQTLs:CMC_SVA_cis:GTEx/v8/Skin_Not_Sun_Exposed_Suprapubic:GTEx/v8/Thyroid:GTEx/v7/Colon_Transverse	NA	Yes	Promoter_anchored_loops	6.937e-08	rs3756334	37
ENSG00000113205	PCDHB3	5	140480234	140483406	1	protein_coding	56132	PCDHB3	NA	0.839112	0	0	135	0.000131022	0.009	PsychENCODE_eQTLs:CMC_SVA_cis	NA	Yes	Promoter_anchored_loops	3.335e-08	rs3756334	37
ENSG00000113209	PCDHB5	5	140514800	140517703	1	protein_coding	26167	PCDHB5	9.45269e-07	0.0851626	0	0	69	1.04564e-08	3.71886e-09	PsychENCODE_eQTLs:GTEx/v8/Nerve_Tibial:GTEx/v6/Heart_Left_Ventricle	NA	No	NA	3.335e-08	rs3756334	37
ENSG00000113211	PCDHB6	5	140529683	140532868	1	protein_coding	56130	PCDHB6	0.00172664	0.94949	0	0	5	3.966e-05	0.00319839	TIGER/Nom_Alonso_Pancreatic_islets	NA	No	NA	0.0002915	rs3756334	37
ENSG00000113212	PCDHB7	5	140552243	140555957	1	protein_coding	56129	PCDHB7	1.30424e-15	-0.341739	0	0	49	3.40726e-08	5.85071e-06	PsychENCODE_eQTLs:CMC_SVA_cis:CMC_NoSVA_cis:GTEx/v8/Brain_Cerebellar_Hemisphere:GTEx/v8/Lung:GTEx/v7/Nerve_Tibial	NA	No	NA	3.901e-06	rs3756334	37
ENSG00000120322	PCDHB8	5	140557371	140560081	1	protein_coding	56128	PCDHB8	4.79969e-08	0.241142	0	0	158	1.405e-10	6.36771e-57	TIGER/Nom_Alonso_Pancreatic_islets:eQTLcatalogue/BrainSeq_ge_brain:eQTLcatalogue/HipSci_ge_iPSC:eQTLcatalogue/Schwartzentruber_2018_ge_sensory_neuron:eQTLcatalogue/TwinsUK_ge_skin:PsychENCODE_eQTLs:GTEx/v8/Adipose_Subcutaneous:GTEx/v8/Adipose_Visceral_Omentum:GTEx/v8/Artery_Tibial:GTEx/v8/Breast_Mammary_Tissue:GTEx/v8/Colon_Transverse:GTEx/v8/Esophagus_Mucosa:GTEx/v8/Heart_Atrial_Appendage:GTEx/v…	NA	No	NA	3.335e-08	rs3756334	37
ENSG00000196963	PCDHB16	5	140560980	140565793	1	protein_coding	57717	PCDHB16	0.00177082	1.76941	0	0	173	3.45878e-10	1.3495e-40	PsychENCODE_eQTLs:CMC_SVA_cis:BRAINEAC/CRBL:GTEx/v7/Adipose_Subcutaneous:GTEx/v7/Adipose_Visceral_Omentum:GTEx/v7/Artery_Aorta:GTEx/v7/Artery_Tibial:GTEx/v7/Breast_Mammary_Tissue:GTEx/v7/Esophagus_Gastroesophageal_Junction:GTEx/v7/Heart_Atrial_Appendage:GTEx/v7/Lung:GTEx/v7/Muscle_Skeletal:GTEx/v7/Nerve_Tibial:GTEx/v7/Skin_Sun_Exposed_Lower_leg:GTEx/v7/Thyroid:GTEx/v6/Adipose_Subcutaneous:GTEx/v6…	NA	No	NA	3.335e-08	rs3756334	37
ENSG00000120324	PCDHB10	5	140571942	140575215	1	protein_coding	56127	PCDHB10	1.17632e-06	0.182888	0	0	111	4.21756e-11	1.06216e-08	PsychENCODE_eQTLs:CMC_SVA_cis:GTEx/v8/Artery_Aorta:GTEx/v8/Brain_Cortex:GTEx/v8/Colon_Sigmoid	NA	No	NA	3.335e-08	rs3756334	37
ENSG00000197479	PCDHB11	5	140579183	140582618	1	protein_coding	56125	PCDHB11	3.09018e-07	-0.0451759	0	0	2	9.04215e-06	1.86578e-18	eQTLcatalogue/BrainSeq_ge_brain:GTEx/v8/Muscle_Skeletal	NA	No	NA	8.322e-06	rs3756334	37
ENSG00000120328	PCDHB12	5	140588269	140591696	1	protein_coding	56124	PCDHB12	0.000155402	-0.162567	0	0	31	6.12092e-06	4.27954e-12	BRAINEAC/THAL:GTEx/v8/Heart_Left_Ventricle:GTEx/v8/Pituitary:GTEx/v6/Heart_Left_Ventricle	NA	No	NA	3.901e-06	rs3756334	37
ENSG00000120327	PCDHB14	5	140602931	140605858	1	protein_coding	56122	PCDHB14	9.05912e-09	-0.185105	0	0	1	0.000236197	0.035147	GTEx/v8/Adipose_Subcutaneous	NA	No	NA	0.0002909	rs3756334	37
ENSG00000113248	PCDHB15	5	140625147	140627799	1	protein_coding	56121	PCDHB15	0.00680082	-0.368947	0	0	16	0.000146987	6.7599e-26	PsychENCODE_eQTLs:GTEx/v8/Adipose_Subcutaneous	NA	Yes	Promoter_anchored_loops	8.357e-08	rs3756334	37
ENSG00000178913	TAF7	5	140698057	140700330	-1	protein_coding	6879	TAF7	0.736629	0.136273	0	0	4	6.3236e-08	0.000271379	eQTLGen_cis_eQTLs	NA	Yes	Adult_Cortex:Fetal_Cortex:GM12878:IMR90:Mesenchymal_Stem_Cell:Mesendoderm:Trophoblast-like_Cell	8.046e-08	rs3756334	37
ENSG00000204956	PCDHGA1	5	140710252	140892546	1	protein_coding	56114	PCDHGA1	0.000268174	-0.95614	0	0	1	NA	0.049	CMC_NoSVA_cis	NA	Yes	GM12878:IMR90:Mesenchymal_Stem_Cell:Mesendoderm:Trophoblast-like_Cell	8.046e-08	rs3756334	37
ENSG00000253910	PCDHGB2	5	140739703	140892546	1	protein_coding	56103	PCDHGB2	3.5429e-07	-0.552711	0	0	32	1.80511e-05	0.00185508	PsychENCODE_eQTLs	NA	Yes	Promoter_anchored_loops	8.046e-08	rs3756334	37
ENSG00000253731	PCDHGA6	5	140753651	140892546	1	protein_coding	56109	PCDHGA6	8.20065e-07	-0.999199	0	0	4	3.94783e-05	0.0187074	GTEx/v8/Skin_Sun_Exposed_Lower_leg	NA	Yes	Promoter_anchored_loops	8.357e-08	rs3756334	37
ENSG00000253953	PCDHGB4	5	140767452	140892546	1	protein_coding	56101	PCDHGB4	0.00256132	-1.04647	0	0	2	3.81008e-05	0.011738	GTEx/v7/Artery_Tibial	NA	No	NA	8.241e-07	rs3756334	37
ENSG00000253767	PCDHGA8	5	140772381	140892546	1	protein_coding	9708	PCDHGA8	9.44701e-09	-0.792845	0	0	1	0.0005303	0.0427661	TIGER/Nom_Alonso_Pancreatic_islets	NA	No	NA	NA	rs3756334	37
ENSG00000253846	PCDHGA10	5	140792743	140892546	1	protein_coding	56106	PCDHGA10	5.4448e-06	-0.995646	0	0	1	6.10904e-05	0.0476119	GTEx/v7/Cells_Transformed_fibroblasts	NA	Yes	Promoter_anchored_loops	1.437e-07	rs3756334	37
ENSG00000253873	PCDHGA11	5	140800762	140891835	1	protein_coding	56105	PCDHGA11	4.54528e-05	-0.1015	0	0	10	6.24981e-06	0.00999493	TIGER/Nom_Alonso_Pancreatic_islets:GTEx/v6/Artery_Tibial	NA	Yes	Fetal_Cortex:Mesenchymal_Stem_Cell	8.046e-08	rs3756334	37
ENSG00000242419	PCDHGC4	5	140864741	140892546	1	protein_coding	56098	PCDHGC4	0.93615	-1.15033	0	0	15	1.73882e-06	0.0120968	GTEx/v6/Skin_Not_Sun_Exposed_Suprapubic	NA	Yes	Adult_Cortex:Fetal_Cortex	3.335e-08	rs3756334	37
ENSG00000240764	PCDHGC5	5	140868808	140892546	1	protein_coding	56097	PCDHGC5	2.85044e-05	-0.96252	0	0	6	2.86126e-05	0.0136898	GTEx/v8/Brain_Cerebellar_Hemisphere	NA	Yes	Adult_Cortex:Fetal_Cortex	1.437e-07	rs3756334	37
ENSG00000164620	RELL2	5	141016517	141020644	1	protein_coding	285613	RELL2	0.800132	-1.78633	0	0	1	8.2973e-05	7.29302e-35	GTEx/v8/Thyroid	NA	Yes	Promoter_anchored_loops	2.039e-07	rs3756334	37
ENSG00000197948	FCHSD1	5	141018869	141030986	-1	protein_coding	89848	FCHSD1	1.92351e-16	NA	0	0	4	1.12292e-08	5.6146e-05	eQTLcatalogue/CEDAR_B-cell_CD19:PsychENCODE_eQTLs	NA	No	NA	0.01778	rs3756334	37
ENSG00000120318	ARAP3	5	141032968	141061788	-1	protein_coding	64411	ARAP3	0.967505	-0.0545428	0	0	1	2.8023e-06	0.00817549	eQTLGen_cis_eQTLs	NA	No	NA	0.0002909	rs3756334	37
ENSG00000131507	NDFIP1	5	141488070	141534005	1	protein_coding	80762	NDFIP1	0.920197	-0.0181274	0	0	2	1.4584e-17	0	eQTLGen_trans_eQTLs	NA	No	NA	0.0007836	rs13054099;rs5751069	109
ENSG00000158497	HMHB1	5	143191726	143200284	1	protein_coding	57824	HMHB1	NA	0.106867	0	0	1	1.6258e-06	0.008129	eQTLcatalogue/GEUVADIS_ge_LCL	NA	No	NA	NA	rs358652	38
ENSG00000145817	YIPF5	5	143537723	143550278	-1	protein_coding	81555	YIPF5	0.931586	1.80284	0	0	24	8.165e-67	0	eQTLcatalogue/CEDAR_rectum:eQTLcatalogue/Fairfax_2014_IFN24:eQTLGen_cis_eQTLs:BIOSQTL/BIOS_eQTL_geneLevel:GTEx/v8/Whole_Blood:GTEx/v8/Esophagus_Mucosa	NA	No	NA	1.117e-08	rs358652	38
ENSG00000183775	KCTD16	5	143550396	143865249	1	protein_coding	57528	KCTD16	0.959973	-0.100166	20	13.23	13	8.34903e-07	0.000357621	PsychENCODE_eQTLs:GTEx/v8/Lung	NA	No	NA	1.117e-08	rs358652	38
ENSG00000019582	CD74	5	149781200	149792492	-1	protein_coding	972	CD74	0.0500581	-0.0324924	0	0	1	2.5328e-08	0.000329193	eQTLGen_trans_eQTLs	NA	No	NA	1.391e-05	rs9074	107
ENSG00000164330	EBF1	5	158122928	158526769	-1	protein_coding	1879	EBF1	0.996264	0.544514	0	0	1	7.9252e-07	0.00673865	eQTLGen_trans_eQTLs	NA	No	NA	1.391e-05	rs9074	107
ENSG00000184347	SLIT3	5	168088745	168728133	-1	protein_coding	6586	SLIT3	0.991788	0.185144	6	10.09	0	NA	NA	NA	NA	Yes	Left_Ventricle:IMR90:Mesenchymal_Stem_Cell:Mesendoderm:Trophoblast-like_Cell:hESC	NA	rs141862082	41
ENSG00000134516	DOCK2	5	169064251	169510386	1	protein_coding	1794	DOCK2	1	0.418954	13	14.48	0	NA	NA	NA	NA	Yes	Aorta:Left_Ventricle:GM12878:IMR90:Mesenchymal_Stem_Cell:Mesendoderm:Trophoblast-like_Cell:hESC	NA	rs141862082	41
ENSG00000204767	FAM196B	5	169291268	169407744	-1	protein_coding	100131897	FAM196B	NA	-0.0248241	4	14.01	0	NA	NA	NA	NA	Yes	Promoter_anchored_loops:Adult_Cortex:Fetal_Cortex:Aorta:Hippocampus:Left_Ventricle:Liver:Psoas:GM12878:IMR90:Mesenchymal_Stem_Cell:Mesendoderm:Trophoblast-like_Cell:hESC	NA	rs141862082	41
ENSG00000234511	C5orf58	5	169659451	169679579	1	protein_coding	133874	C5orf58	0.0389421	0.214326	1	6.095	0	NA	NA	NA	NA	Yes	Promoter_anchored_loops:Mesenchymal_Stem_Cell:Mesendoderm:hESC	1.444e-08	rs141862082	41
ENSG00000043462	LCP2	5	169673241	169725231	-1	protein_coding	3937	LCP2	0.9889	-0.171062	5	6.095	0	NA	NA	NA	NA	Yes	EP_correlation_cell_type_oneway:IMR90:Mesenchymal_Stem_Cell:Mesendoderm:Trophoblast-like_Cell:hESC	1.444e-08	rs141862082	41
ENSG00000182132	KCNIP1	5	169780491	170163636	1	protein_coding	30820	KCNIP1	0.020232	-0.160895	38	16.57	0	NA	NA	NA	NA	Yes	Spleen	NA	rs141862082	41
ENSG00000145936	KCNMB1	5	169801675	169816681	-1	protein_coding	3779	KCNMB1	2.07039e-05	3.55075	1	0.339	0	NA	NA	NA	NA	Yes	IMR90:Mesenchymal_Stem_Cell:Mesendoderm:hESC	1.444e-08	rs141862082	41
ENSG00000094755	GABRP	5	170190354	170241051	1	protein_coding	2568	GABRP	9.63031e-06	0.363021	9	11.1	0	NA	NA	NA	NA	Yes	Spleen:IMR90:Mesenchymal_Stem_Cell	NA	rs141862082	41
ENSG00000204764	RANBP17	5	170288874	170727019	1	protein_coding	64901	RANBP17	8.61018e-36	0.250861	21	17.59	0	NA	NA	NA	NA	Yes	Promoter_anchored_loops:Left_Ventricle:IMR90:Mesenchymal_Stem_Cell:Mesendoderm:hESC	NA	rs141862082	41
ENSG00000112149	CD83	6	14117872	14137149	1	protein_coding	9308	CD83	0.0177807	-0.0735049	0	0	1	1.5422e-08	0.000188176	eQTLGen_trans_eQTLs	NA	No	NA	1.391e-05	rs9074	107
ENSG00000124788	ATXN1	6	16299343	16761722	-1	protein_coding	6310	ATXN1	0.398661	-2.62497	0	0	1	1.8386e-06	0.0142014	eQTLGen_trans_eQTLs	NA	Yes	Left_Ventricle:GM12878:IMR90:Mesenchymal_Stem_Cell:Mesendoderm:Trophoblast-like_Cell:hESC	2.563e-08	rs13054099;rs35948205	42:109
ENSG00000230873	STMND1	6	17102489	17131603	1	protein_coding	401236	STMND1	NA	-0.50121	0	0	3	4.62268e-12	7.43787e-15	GTEx/v8/Testis:GTEx/v7/Testis:GTEx/v6/Testis	NA	Yes	IMR90:Mesenchymal_Stem_Cell	2.563e-08	rs35948205	42
ENSG00000188107	EYS	6	64429876	66417118	-1	protein_coding	346007	EYS	8.21411e-09	-0.394014	0	0	78	2.90488e-08	1.33464e-05	EyeGEx:CMC_SVA_cis:CMC_NoSVA_cis:BRAINEAC/TCTX	NA	Yes	Aorta:Left_Ventricle:Liver:Mesenchymal_Stem_Cell:Mesendoderm:Neural_Progenitor_Cell:hESC	1.976e-08	rs9360163;rs7753493;rs9360163:rs7753493	43
ENSG00000082293	COL19A1	6	70576463	70919679	1	protein_coding	1310	COL19A1	5.55032e-17	1.30528	0	0	1	5.9075e-13	0	eQTLGen_trans_eQTLs	NA	No	NA	1.391e-05	rs9074	107
ENSG00000111799	COL12A1	6	75794042	75915767	-1	protein_coding	1303	COL12A1	1	-1.78072	0	0	17	3.63201e-06	0.01816	eQTLcatalogue/TwinsUK_ge_skin	NA	No	NA	0.03539	rs11755902	44
ENSG00000112697	TMEM30A	6	75962640	75994684	-1	protein_coding	55754	TMEM30A	0.0406831	-0.0929268	0	0	123	1.9582e-37	0	TIGER/Nom_Alonso_Pancreatic_islets:EyeGEx:eQTLcatalogue/BLUEPRINT_ge_neutrophil:eQTLGen_cis_eQTLs:BIOSQTL/BIOS_eQTL_geneLevel:GTEx/v8/Whole_Blood:GTEx/v8/Muscle_Skeletal:GTEx/v8/Cells_Cultured_fibroblasts:GTEx/v7/Whole_Blood:GTEx/v6/Whole_Blood	NA	Yes	Aorta:Left_Ventricle:Liver:GM12878:IMR90:Mesenchymal_Stem_Cell:Mesendoderm:Neural_Progenitor_Cell:Trophoblast-like_Cell:hESC	1.984e-08	rs11755902	44
ENSG00000118407	FILIP1	6	76001575	76203454	-1	protein_coding	27145	FILIP1	1.85338e-07	-0.333854	23	9.732	141	1.27229e-27	3.84552e-69	TIGER/Nom_Alonso_Pancreatic_islets:EyeGEx:eQTLcatalogue/TwinsUK_ge_fat:PsychENCODE_eQTLs:BIOSQTL/BIOS_eQTL_geneLevel:GTEx/v8/Adipose_Subcutaneous:GTEx/v8/Adipose_Visceral_Omentum:GTEx/v8/Brain_Cerebellar_Hemisphere:GTEx/v8/Brain_Cerebellum:GTEx/v8/Breast_Mammary_Tissue:GTEx/v8/Cells_Cultured_fibroblasts:GTEx/v8/Skin_Sun_Exposed_Lower_leg:GTEx/v8/Thyroid:GTEx/v7/Adipose_Subcutaneous:GTEx/v7/Brain_…	NA	Yes	Left_Ventricle:Liver:GM12878:IMR90:Mesenchymal_Stem_Cell:Mesendoderm:Neural_Progenitor_Cell:Trophoblast-like_Cell:hESC	1.984e-08	rs11755902	44
ENSG00000112701	SENP6	6	76311225	76427997	1	protein_coding	26054	SENP6	0.999877	-0.687009	69	11.97	148	3.27167000000001e-310	0	eQTLcatalogue/BLUEPRINT_ge_monocyte:eQTLcatalogue/BLUEPRINT_ge_neutrophil:eQTLcatalogue/CEDAR_monocyte_CD14:eQTLcatalogue/CEDAR_neutrophil_CD15:eQTLcatalogue/CEDAR_T-cell_CD4:eQTLcatalogue/Fairfax_2014_naive:eQTLcatalogue/Lepik_2017_ge_blood:eQTLcatalogue/Naranbhai_2015_neutrophil_CD16:eQTLcatalogue/TwinsUK_ge_blood:eQTLcatalogue/TwinsUK_ge_LCL:PsychENCODE_eQTLs:DICE/Monocyte_classical:eQTLGen_ci…	NA	No	NA	1.984e-08	rs11755902	44
ENSG00000196586	MYO6	6	76458909	76629254	1	protein_coding	4646	MYO6	0.0177884	-0.139569	10	2.59	125	9.0282e-28	0	eQTLcatalogue/CEDAR_transverse_colon:eQTLcatalogue/TwinsUK_ge_fat:PsychENCODE_eQTLs:DICE/T_CD4_naive_activated:eQTLGen_cis_eQTLs:BIOSQTL/BIOS_eQTL_geneLevel:CMC_SVA_cis:GTEx/v8/Adipose_Subcutaneous:GTEx/v8/Adipose_Visceral_Omentum:GTEx/v8/Artery_Aorta:GTEx/v8/Brain_Cerebellar_Hemisphere:GTEx/v8/Brain_Cerebellum:GTEx/v8/Brain_Cortex:GTEx/v8/Breast_Mammary_Tissue:GTEx/v8/Heart_Atrial_Appendage:GTEx…	NA	Yes	Left_Ventricle:Liver:IMR90:Mesenchymal_Stem_Cell:Mesendoderm:Trophoblast-like_Cell:hESC	1.984e-08	rs11755902	44
ENSG00000112706	IMPG1	6	76630832	76782395	-1	protein_coding	3617	IMPG1	6.13186e-13	-0.401686	0	0	41	6.2025e-06	8.93323e-06	PsychENCODE_eQTLs:CMC_SVA_cis:GTEx/v8/Brain_Caudate_basal_ganglia:GTEx/v8/Muscle_Skeletal:GTEx/v8/Cells_Cultured_fibroblasts:GTEx/v7/Nerve_Tibial	NA	No	NA	0.0008688	rs11755902	44
ENSG00000152034	MCHR2	6	100367786	100442123	-1	protein_coding	84539	MCHR2	3.50211e-05	0.0398629	0	0	21	5.63213e-06	0.000709781	GTEx/v7/Brain_Cortex	NA	Yes	IMR90:hESC	4.328e-10	rs7740902;rs12374612;rs12374612:rs7740902	45
ENSG00000112246	SIM1	6	100832891	100912805	-1	protein_coding	6492	SIM1	0.996936	0.572327	7	11.28	102	1.79268e-06	0.0203188	PsychENCODE_eQTLs:DICE/T_CD4_memory_TREG:BIOSQTL/BIOS_eQTL_geneLevel	NA	Yes	Left_Ventricle:Liver:Spleen:GM12878:IMR90:Mesenchymal_Stem_Cell:Mesendoderm:Neural_Progenitor_Cell:Trophoblast-like_Cell:hESC	3.318e-10	rs12374612;rs7740902;rs12374612:rs7740902	45
ENSG00000112249	ASCC3	6	100956070	101329248	-1	protein_coding	10973	ASCC3	1.42788e-10	0.106686	276	20.8	375	1.267e-94	0	EyeGEx:eQTLcatalogue/Alasoo_2018_ge_macrophage_IFNg_Salmonella:eQTLcatalogue/Alasoo_2018_ge_macrophage_Salmonella:eQTLcatalogue/BLUEPRINT_ge_T-cell:eQTLcatalogue/BrainSeq_ge_brain:eQTLcatalogue/CEDAR_monocyte_CD14:eQTLcatalogue/Fairfax_2014_LPS24:eQTLcatalogue/Fairfax_2014_LPS2:eQTLcatalogue/Nedelec_2016_ge_macrophage_naive:eQTLcatalogue/Nedelec_2016_ge_macrophage_Salmonella:eQTLcatalogue/Quach_2…	NA	Yes	Left_Ventricle:Liver:IMR90:Mesenchymal_Stem_Cell:Mesendoderm:hESC	1.711e-10	rs7740902;rs12374612;rs12374612:rs12374612:rs7740902	45
ENSG00000164418	GRIK2	6	101846664	102517958	1	protein_coding	2898	GRIK2	0.994568	-0.622432	0	0	304	1.65758e-13	2.20301e-20	eQTLcatalogue/TwinsUK_ge_skin:PsychENCODE_eQTLs:GTEx/v8/Adipose_Subcutaneous:GTEx/v8/Artery_Aorta:GTEx/v8/Artery_Tibial:GTEx/v8/Breast_Mammary_Tissue:GTEx/v8/Lung:GTEx/v8/Pancreas:GTEx/v8/Cells_Cultured_fibroblasts:GTEx/v8/Skin_Sun_Exposed_Lower_leg:GTEx/v8/Testis:GTEx/v7/Adipose_Subcutaneous:GTEx/v7/Artery_Aorta:GTEx/v7/Artery_Tibial:GTEx/v7/Breast_Mammary_Tissue:GTEx/v7/Lung:GTEx/v7/Cells_Trans…	NA	Yes	Promoter_anchored_loops:IMR90:Mesenchymal_Stem_Cell:Mesendoderm:hESC	1.711e-10	rs12374612;rs7740902;rs7740902:rs7740902;rs12374612:rs12374612	45
ENSG00000085382	HACE1	6	105175968	105307794	-1	protein_coding	57531	HACE1	0.00159566	-0.519621	67	13.43	135	2.45648e-37	0	TIGER/Nom_Alonso_Pancreatic_islets:EyeGEx:eQTLcatalogue/BLUEPRINT_ge_monocyte:eQTLcatalogue/BLUEPRINT_ge_T-cell:eQTLcatalogue/BrainSeq_ge_brain:eQTLcatalogue/GENCORD_ge_LCL:eQTLcatalogue/GENCORD_ge_T-cell:eQTLcatalogue/GEUVADIS_ge_LCL:eQTLcatalogue/TwinsUK_ge_LCL:PsychENCODE_eQTLs:eQTLGen_cis_eQTLs:BIOSQTL/BIOS_eQTL_geneLevel:xQTLServer_eQTLs:CMC_SVA_cis:CMC_NoSVA_cis:GTEx/v8/Adipose_Subcutaneous…	NA	Yes	IMR90:Mesenchymal_Stem_Cell:Mesendoderm:Trophoblast-like_Cell:hESC	3.339e-11	rs4515420	46
ENSG00000187772	LIN28B	6	105404923	105531207	1	protein_coding	389421	LIN28B	0.721962	-1.01937	24	13.46	83	1.31827e-15	1.16557e-11	EyeGEx:PsychENCODE_eQTLs:CMC_SVA_cis:GTEx/v8/Pituitary:GTEx/v7/Pituitary	NA	Yes	IMR90:Mesenchymal_Stem_Cell:Mesendoderm:Neural_Progenitor_Cell:Trophoblast-like_Cell:hESC	3.339e-11	rs4515420	46
ENSG00000112276	BVES	6	105544697	105585049	-1	protein_coding	11149	BVES	0.000308543	5.85211	7	9.822	14	1.04969e-22	1.09333e-38	eQTLcatalogue/Fairfax_2014_naive:CMC_SVA_cis:GTEx/v8/Adipose_Subcutaneous:GTEx/v8/Adipose_Visceral_Omentum:GTEx/v8/Artery_Aorta:GTEx/v8/Artery_Coronary:GTEx/v8/Artery_Tibial:GTEx/v8/Breast_Mammary_Tissue:GTEx/v8/Colon_Sigmoid:GTEx/v8/Esophagus_Gastroesophageal_Junction:GTEx/v8/Esophagus_Mucosa:GTEx/v8/Esophagus_Muscularis:GTEx/v8/Lung:GTEx/v8/Muscle_Skeletal:GTEx/v8/Cells_Cultured_fibroblasts:GTE…	NA	Yes	Left_Ventricle:IMR90:Mesenchymal_Stem_Cell:Mesendoderm:Trophoblast-like_Cell:hESC	3.339e-11	rs4515420	46
ENSG00000132429	POPDC3	6	105606155	105627870	-1	protein_coding	64208	POPDC3	1.70814e-05	NA	5	14.5	13	1.88696e-10	2.80132e-32	GTEx/v8/Artery_Aorta:GTEx/v8/Artery_Tibial:GTEx/v8/Esophagus_Gastroesophageal_Junction:GTEx/v8/Esophagus_Muscularis:GTEx/v8/Muscle_Skeletal:GTEx/v8/Cells_Cultured_fibroblasts:GTEx/v8/Testis:GTEx/v8/Thyroid:GTEx/v7/Artery_Tibial:GTEx/v7/Esophagus_Muscularis:GTEx/v7/Muscle_Skeletal:GTEx/v7/Cells_Transformed_fibroblasts:GTEx/v7/Stomach:GTEx/v7/Thyroid:GTEx/v6/Esophagus_Muscularis:GTEx/v6/Cells_Trans…	NA	Yes	Fetal_Cortex:Left_Ventricle:IMR90:Mesenchymal_Stem_Cell:Mesendoderm:Trophoblast-like_Cell:hESC	3.339e-11	rs4515420	46
ENSG00000085377	PREP	6	105725440	105850959	-1	protein_coding	5550	PREP	0.991044	NA	0	0	3	1.47889e-05	3.01942e-07	GTEx/v7/Skin_Not_Sun_Exposed_Suprapubic	NA	Yes	Fetal_Cortex:Aorta:Left_Ventricle:Liver:Right_Ventricle:GM12878:IMR90:Mesenchymal_Stem_Cell:Mesendoderm:Neural_Progenitor_Cell:Trophoblast-like_Cell:hESC	3.339e-11	rs4515420	46
ENSG00000112394	SLC16A10	6	111408781	111552397	1	protein_coding	117247	SLC16A10	0.067607	NA	0	0	4	6.9505e-23	0	eQTLGen_trans_eQTLs	NA	No	NA	1.527e-07	rs13054099;rs5751069	109
ENSG00000009844	VTA1	6	142468367	142545826	1	protein_coding	51534	VTA1	0.0824061	-1.10404	0	0	20	2.0362e-07	0.000661136	eQTLGen_cis_eQTLs	NA	Yes	Adult_Cortex:Fetal_Cortex:IMR90:Mesenchymal_Stem_Cell:Mesendoderm:Trophoblast-like_Cell:hESC	7.187e-10	rs1581046	47
ENSG00000112414	GPR126	6	142622991	142767403	1	protein_coding	57211	GPR126	0.283489	-0.199655	4	6.085	42	5.9097e-79	0	eQTLGen_cis_eQTLs:BIOSQTL/BIOS_eQTL_geneLevel:GTEx/v8/Adipose_Subcutaneous:GTEx/v8/Adipose_Visceral_Omentum:GTEx/v8/Esophagus_Muscularis:GTEx/v8/Muscle_Skeletal:GTEx/v8/Skin_Not_Sun_Exposed_Suprapubic:GTEx/v8/Skin_Sun_Exposed_Lower_leg:GTEx/v7/Adipose_Subcutaneous:GTEx/v7/Skin_Not_Sun_Exposed_Suprapubic:GTEx/v7/Skin_Sun_Exposed_Lower_leg:GTEx/v6/Adipose_Subcutaneous	NA	Yes	Fetal_Cortex:IMR90:Mesenchymal_Stem_Cell:Mesendoderm:Trophoblast-like_Cell:hESC	1.419e-08	rs1581046	47
ENSG00000034693	PEX3	6	143771944	143811147	1	protein_coding	8504	PEX3	0.00276137	-0.410915	0	0	27	1.94268e-05	0.00381613	TIGER/Nom_Alonso_Pancreatic_islets:GTEx/v8/Stomach	NA	Yes	Fetal_Cortex:Left_Ventricle:Liver:GM12878:IMR90:Mesenchymal_Stem_Cell:Mesendoderm:Neural_Progenitor_Cell:Trophoblast-like_Cell:hESC	7.187e-10	rs1581046	47
ENSG00000001036	FUCA2	6	143815948	143832827	-1	protein_coding	2519	FUCA2	0.000365584	0.179337	0	0	1	NA	0.049	CMC_NoSVA_cis	NA	Yes	Adult_Cortex:Fetal_Cortex:Aorta:Left_Ventricle:Liver:GM12878:IMR90:Mesenchymal_Stem_Cell:Mesendoderm:Trophoblast-like_Cell:hESC	7.187e-10	rs1581046	47
ENSG00000120262	CCDC170	6	151815165	151942328	1	protein_coding	80129	CCDC170	1.02112e-19	1.38068	0	0	12	8.6351e-06	0.0243841	eQTLGen_cis_eQTLs	NA	Yes	Liver:IMR90:Mesendoderm	9.304e-10	rs2982695;rs9765981;rs2982695:rs2982695	48
ENSG00000091831	ESR1	6	151977826	152450754	1	protein_coding	2099	ESR1	0.987167	-1.05687	115	20.3	31	2.26112e-09	2.0285e-06	GTEx/v8/Artery_Aorta:GTEx/v8/Brain_Caudate_basal_ganglia:GTEx/v8/Testis:GTEx/v7/Artery_Aorta:GTEx/v7/Testis	NA	Yes	Left_Ventricle:IMR90:Mesenchymal_Stem_Cell:Mesendoderm:hESC	9.304e-10	rs2982695;rs9765981;rs9765981:rs2982695:rs9765981	48
ENSG00000131018	SYNE1	6	152442819	152958936	-1	protein_coding	23345	SYNE1	3.75068e-27	-0.109891	0	0	1	1.42083e-05	0.049	DICE/Monocyte_non_classical	NA	No	NA	NA	rs2982695	48
ENSG00000091844	RGS17	6	153325594	153452384	-1	protein_coding	26575	RGS17	0.380684	-0.241391	0	0	3	0.0005362	0.0432419	TIGER/Nom_Alonso_Pancreatic_islets	NA	No	NA	0.02239	rs2982695	48
ENSG00000164850	GPER1	7	1121844	1133451	1	protein_coding	2852	GPER1	0.725421	0.809124	0	0	1	3.43159e-05	0.049	DICE/T_CD8_naive	NA	No	NA	9.084e-12	rs10267593	49
ENSG00000178381	ZFAND2A	7	1191707	1200395	-1	protein_coding	90637	ZFAND2A	0.000389857	NA	0	0	1	8.27711e-06	0.0413856	eQTLcatalogue/GENCORD_ge_T-cell	NA	No	NA	4.817e-07	rs6976684	49
ENSG00000164877	MICALL2	7	1468101	1499138	-1	protein_coding	79778	MICALL2	7.76189e-17	NA	0	0	5	3.19073e-06	0.0146309	eQTLcatalogue/CEDAR_T-cell_CD8:GTEx/v8/Adipose_Visceral_Omentum:GTEx/v8/Brain_Cortex:GTEx/v8/Brain_Nucleus_accumbens_basal_ganglia	NA	No	NA	NA	rs3823624;rs10267593	49
ENSG00000198517	MAFK	7	1570350	1582679	1	protein_coding	7975	MAFK	0.557286	-0.718425	0	0	8	0.000137167	0.0110787	PsychENCODE_eQTLs	NA	Yes	EP_links_oneway:Promoter_anchored_loops:EP_correlation_cell_type_oneway	2.186e-15	rs3823624;rs10267593;rs10267593:rs3823624;rs6973700:rs3823624:rs1637759	49
ENSG00000164855	TMEM184A	7	1581871	1600457	-1	protein_coding	101927064	TMEM184A	8.88852e-05	1.72893	0	0	1	1.7399e-06	0.00943203	GTEx/v7/Brain_Cerebellar_Hemisphere	NA	Yes	Promoter_anchored_loops:Adult_Cortex:Fetal_Cortex:Left_Ventricle:GM12878:IMR90:Mesenchymal_Stem_Cell:Mesendoderm	2.186e-15	rs1637759;rs1637759:rs10267593:rs3823624;rs10267593:rs10267593;rs6976684:rs3823624;rs10267593;rs6973700;rs6973700:rs3823624:rs3823624;rs6973700:rs6976684:rs6973700;rs6976684	49
ENSG00000225968	ELFN1	7	1727755	1787590	1	protein_coding	392617	ELFN1	0.699066	-0.0225181	1	5.692	55	2.56958e-06	1.18978e-08	CMC_NoSVA_cis:GTEx/v8/Cells_Cultured_fibroblasts:GTEx/v7/Cells_Transformed_fibroblasts:GTEx/v6/Cells_Transformed_fibroblasts	NA	Yes	Promoter_anchored_loops:IMR90:Mesenchymal_Stem_Cell	2.186e-15	rs6976684;rs3823624;rs10267593;rs6973700;rs1637759;rs10267593:rs3823624;rs6973700:rs3823624:rs10267593:rs1637759	49
ENSG00000002822	MAD1L1	7	1855429	2272878	-1	protein_coding	8379	MAD1L1	2.03781e-10	-0.0844627	208	13.48	171	1.8158e-157	0	eQTLcatalogue/CEDAR_B-cell_CD19:eQTLcatalogue/CEDAR_monocyte_CD14:eQTLcatalogue/Fairfax_2012_B-cell_CD19:eQTLcatalogue/Fairfax_2014_IFN24:eQTLcatalogue/Fairfax_2014_LPS24:eQTLcatalogue/Fairfax_2014_LPS2:eQTLcatalogue/Fairfax_2014_naive:eQTLcatalogue/Quach_2016_ge_monocyte_naive:eQTLGen_cis_eQTLs:BIOSQTL/BIOS_eQTL_geneLevel:CMC_SVA_cis:GTEx/v8/Whole_Blood:GTEx/v8/Artery_Tibial:GTEx/v8/Esophagus_Ga…	NA	Yes	Promoter_anchored_loops	2.186e-15	rs6976684;rs6973700;rs10267593;rs3823624;rs1637759;rs6973700:rs3823624;rs6973700:rs10267593	49
ENSG00000176349	AC110781.3	7	1878222	1889567	1	protein_coding	100128374	NA	NA	NA	18	9.151	111	4.37873e-33	4.99066e-30	eQTLcatalogue/Quach_2016_ge_monocyte_R848:PsychENCODE_eQTLs:DICE/NK:GTEx/v8/Brain_Caudate_basal_ganglia:GTEx/v8/Brain_Hypothalamus:GTEx/v8/Brain_Nucleus_accumbens_basal_ganglia:GTEx/v8/Pituitary:GTEx/v8/Testis:GTEx/v7/Brain_Nucleus_accumbens_basal_ganglia:GTEx/v7/Pituitary:GTEx/v7/Testis:GTEx/v6/Brain_Nucleus_accumbens_basal_ganglia	NA	Yes	Promoter_anchored_loops	2.186e-15	rs3823624;rs6973700;rs10267593;rs1637759;rs6976684;rs10267593:rs3823624	49
ENSG00000122687	FTSJ2	7	2273866	2281840	-1	protein_coding	29960	FTSJ2	1.97488e-05	0.0965956	4	4.275	181	4.7877e-65	0	EyeGEx:eQTLcatalogue/CEDAR_ileum:eQTLcatalogue/CEDAR_T-cell_CD4:eQTLcatalogue/Fairfax_2014_IFN24:eQTLcatalogue/Fairfax_2014_naive:PsychENCODE_eQTLs:DICE/B_cell_naive:DICE/T_CD8_naive_activated:DICE/T_CD4_TFH:DICE/T_CD4_TH17:DICE/T_CD4_TH2:DICE/T_CD4_memory_TREG:DICE/T_CD4_naive_TREG:eQTLGen_cis_eQTLs:BIOSQTL/BIOS_eQTL_geneLevel:CMC_SVA_cis:CMC_NoSVA_cis:GTEx/v8/Adipose_Subcutaneous:GTEx/v8/Adipos…	NA	Yes	Promoter_anchored_loops:Fetal_Cortex	2.186e-15	rs1637759;rs10267593;rs6976684;rs3823624;rs6973700;rs1637759:rs10267593:rs3823624	49
ENSG00000106268	NUDT1	7	2281857	2290781	1	protein_coding	4521	NUDT1	1.28825e-09	NA	3	4.275	92	1.3704e-156	0	eQTLcatalogue/HipSci_ge_iPSC:eQTLcatalogue/Lepik_2017_ge_blood:eQTLGen_cis_eQTLs:GTEx/v8/Adipose_Subcutaneous:GTEx/v8/Brain_Cerebellum:GTEx/v8/Brain_Frontal_Cortex_BA9:GTEx/v8/Breast_Mammary_Tissue:GTEx/v8/Muscle_Skeletal:GTEx/v8/Nerve_Tibial:GTEx/v8/Cells_Cultured_fibroblasts:GTEx/v8/Skin_Sun_Exposed_Lower_leg:GTEx/v8/Vagina:GTEx/v7/Whole_Blood:GTEx/v7/Artery_Tibial:GTEx/v7/Skin_Sun_Exposed_Lowe…	NA	Yes	Promoter_anchored_loops:Fetal_Cortex	1.234e-14	rs1637759;rs3823624;rs6973700;rs6976684;rs10267593;rs1637759:rs10267593:rs3823624	49
ENSG00000106266	SNX8	7	2291405	2393953	-1	protein_coding	102465503	SNX8	0.165171	-0.451639	3	4.275	29	1.23019e-20	8.97356e-20	eQTLcatalogue/TwinsUK_ge_skin:BIOSQTL/BIOS_eQTL_geneLevel:GTEx/v8/Adipose_Subcutaneous:GTEx/v8/Breast_Mammary_Tissue:GTEx/v8/Skin_Sun_Exposed_Lower_leg:GTEx/v8/Thyroid:GTEx/v7/Adipose_Subcutaneous:GTEx/v7/Thyroid:GTEx/v6/Adipose_Subcutaneous:GTEx/v6/Thyroid	NA	Yes	Promoter_anchored_loops:IMR90	5.484e-14	rs1637759;rs10267593;rs3823624;rs6976684:rs3823624;rs10267593:rs10267593:rs3823624:rs10267593;rs6976684:rs6973700;rs6976684	49
ENSG00000106263	EIF3B	7	2393721	2420380	1	protein_coding	8662	EIF3B	0.999971	0.333714	0	0	2	1.3449e-06	4.25847e-28	eQTLGen_cis_eQTLs:CMC_SVA_cis:GTEx/v8/Esophagus_Mucosa	NA	Yes	Promoter_anchored_loops:IMR90	5.484e-14	rs1637759;rs6976684:rs3823624;rs10267593:rs10267593:rs3823624:rs10267593;rs6976684:rs6973700;rs6976684	49
ENSG00000136213	CHST12	7	2443223	2474242	1	protein_coding	55501	CHST12	0.000240663	NA	0	0	4	7.925e-06	0.0225446	eQTLcatalogue/van_de_Bunt_2015_ge_pancreatic_islet:eQTLGen_cis_eQTLs	NA	Yes	Adult_Cortex	7.625e-06	rs3823624;rs6973700;rs10267593;rs1637759	49
ENSG00000106009	BRAT1	7	2577511	2595361	-1	protein_coding	221927	BRAT1	3.85835e-09	NA	0	0	1	5.07204e-05	0.00255409	GTEx/v8/Heart_Left_Ventricle	NA	No	NA	NA	rs10267593	49
ENSG00000106012	IQCE	7	2598632	2654368	1	protein_coding	23288	IQCE	1.34473e-25	2.67671	0	0	1	3.92693e-05	0.049	DICE/T_CD8_naive_activated	NA	No	NA	2.442e-11	rs3823624;rs10267593	49
ENSG00000005108	THSD7A	7	11409984	11871824	-1	protein_coding	221981	THSD7A	0.999281	-0.67517	0	0	1	8.85359e-06	0.0442679	eQTLcatalogue/Kasela_2017_T-cell_CD4	NA	Yes	Left_Ventricle:Liver:IMR90:Mesenchymal_Stem_Cell:Mesendoderm:Trophoblast-like_Cell:hESC	4.231e-12	rs1990622	50
ENSG00000106460	TMEM106B	7	12250867	12282993	1	protein_coding	54664	TMEM106B	0.515078	3.38065	68	13.52	69	3.5249e-69	0	EyeGEx:eQTLcatalogue/BLUEPRINT_ge_monocyte:eQTLcatalogue/BLUEPRINT_ge_neutrophil:eQTLcatalogue/BLUEPRINT_ge_T-cell:eQTLcatalogue/CEDAR_monocyte_CD14:eQTLcatalogue/CEDAR_neutrophil_CD15:eQTLcatalogue/Fairfax_2014_IFN24:eQTLcatalogue/Fairfax_2014_LPS24:eQTLcatalogue/Fairfax_2014_naive:eQTLcatalogue/GENCORD_ge_LCL:eQTLcatalogue/GEUVADIS_ge_LCL:eQTLcatalogue/Naranbhai_2015_neutrophil_CD16:eQTLcatalog…	NA	Yes	Mesenchymal_Stem_Cell:Mesendoderm:hESC	4.231e-12	rs1990622	50
ENSG00000146530	VWDE	7	12370511	12443567	-1	protein_coding	221806	VWDE	NA	0.87633	0	0	46	2.7038e-44	0	TIGER/Nom_Alonso_Pancreatic_islets:eQTLcatalogue/HipSci_ge_iPSC:PsychENCODE_eQTLs:eQTLGen_cis_eQTLs:BIOSQTL/BIOS_eQTL_geneLevel:CMC_SVA_cis:CMC_NoSVA_cis:GTEx/v8/Brain_Cortex:GTEx/v8/Brain_Frontal_Cortex_BA9:GTEx/v8/Brain_Hypothalamus:GTEx/v8/Brain_Nucleus_accumbens_basal_ganglia:GTEx/v8/Breast_Mammary_Tissue:GTEx/v8/Colon_Transverse:GTEx/v8/Esophagus_Mucosa:GTEx/v8/Heart_Atrial_Appendage:GTEx/v8…	NA	No	NA	4.305e-12	rs1990622	50
ENSG00000006747	SCIN	7	12610203	12693228	1	protein_coding	85477	SCIN	4.0823e-16	0.0242818	0	0	4	3.4841e-06	0.0100278	eQTLGen_cis_eQTLs	NA	No	NA	0.000161	rs1990622	50
ENSG00000122644	ARL4A	7	12726481	12730559	1	protein_coding	10124	ARL4A	0.640299	1.81094	0	0	36	2.90412e-13	1.45206e-09	eQTLcatalogue/BLUEPRINT_ge_neutrophil	NA	No	NA	4.231e-12	rs1990622	50
ENSG00000106537	TSPAN13	7	16793160	16824161	1	protein_coding	27075	TSPAN13	0.609851	-0.0519861	0	0	2	4.3996e-07	0.00396885	eQTLGen_trans_eQTLs	NA	No	NA	1.391e-05	rs301806;rs9074	0.115972
ENSG00000136193	SCRN1	7	29959719	30029905	-1	protein_coding	9805	SCRN1	0.0651886	0.222481	0	0	1	1.0291e-06	0.00836143	eQTLGen_trans_eQTLs	NA	No	NA	0.02339	rs301806	1
ENSG00000122515	ZMIZ2	7	44788180	44809477	1	protein_coding	83637	ZMIZ2	0.99962	0.416826	0	0	1	3.8628e-07	0.00343046	eQTLGen_trans_eQTLs	NA	No	NA	1.391e-05	rs9074	107
ENSG00000158321	AUTS2	7	69063905	70258054	1	protein_coding	26053	AUTS2	0.996187	-0.774736	0	0	2	4.0559e-08	0.000582138	eQTLGen_trans_eQTLs	NA	No	NA	1.527e-07	rs13054099;rs5751069	109
ENSG00000009954	BAZ1B	7	72854728	72936608	-1	protein_coding	9031	BAZ1B	1	-1.10698	0	0	1	2.2921e-06	0.0172833	eQTLGen_trans_eQTLs	NA	No	NA	0.03871	rs13054099	109
ENSG00000005471	ABCB4	7	87031013	87109751	-1	protein_coding	5244	ABCB4	0.000203043	NA	0	0	1	5.1643e-06	0.0337695	eQTLGen_trans_eQTLs	NA	No	NA	1.391e-05	rs9074	107
ENSG00000177683	THAP5	7	108194987	108210194	-1	protein_coding	168451	THAP5	0.00279204	-0.0651936	0	0	27	5.07944e-07	6.05362e-89	GTEx/v8/Artery_Tibial:GTEx/v8/Colon_Transverse:GTEx/v8/Lung:GTEx/v8/Muscle_Skeletal:GTEx/v8/Nerve_Tibial:GTEx/v8/Cells_Cultured_fibroblasts:GTEx/v8/Thyroid:GTEx/v7/Prostate	NA	Yes	Mesenchymal_Stem_Cell:Mesendoderm:hESC	3.22e-10	rs12705593;rs55704657;rs12705593:rs12705593	51
ENSG00000205174	C7orf66	7	108524032	108524644	-1	protein_coding	154907	C7orf66	0.00581437	0.0618119	0	0	11	1.38898e-05	6.20264e-05	GTEx/v8/Testis:GTEx/v6/Testis	NA	Yes	Left_Ventricle:IMR90:Mesenchymal_Stem_Cell:Mesendoderm:hESC	1.548e-08	rs55704657;rs12705593;rs12705593:rs12705593	51
ENSG00000128573	FOXP2	7	113726382	114333827	1	protein_coding	93986	FOXP2	0.996179	-0.404517	64	18.18	50	2.38452e-19	3.01145e-14	EyeGEx:eQTLcatalogue/TwinsUK_ge_fat:CMC_SVA_cis:GTEx/v8/Adipose_Subcutaneous:GTEx/v8/Adipose_Visceral_Omentum:GTEx/v8/Adrenal_Gland:GTEx/v8/Artery_Coronary:GTEx/v8/Pituitary:GTEx/v7/Adipose_Subcutaneous:GTEx/v7/Adipose_Visceral_Omentum:GTEx/v7/Artery_Coronary:GTEx/v7/Breast_Mammary_Tissue:GTEx/v7/Pituitary:GTEx/v6/Adipose_Subcutaneous:GTEx/v6/Pituitary	NA	Yes	Adult_Cortex:Fetal_Cortex:Aorta:Left_Ventricle:Liver:Psoas:Right_Ventricle:IMR90:Mesenchymal_Stem_Cell:Mesendoderm:Neural_Progenitor_Cell:Trophoblast-like_Cell:hESC	9.76e-10	rs8180817	52
ENSG00000135272	MDFIC	7	114562209	114659256	1	protein_coding	29969	MDFIC	NA	-1.32194	0	0	32	4.53411e-06	0.000373677	EyeGEx:GTEx/v8/Colon_Sigmoid:GTEx/v8/Heart_Atrial_Appendage:GTEx/v7/Colon_Sigmoid	NA	Yes	Fetal_Cortex:IMR90:Mesenchymal_Stem_Cell:Mesendoderm:hESC	9.76e-10	rs8180817	52
ENSG00000004866	ST7	7	116593292	116870157	1	protein_coding	102466616	ST7	0.998052	-0.203429	0	0	2	2.39877e-05	0.0288215	GTEx/v7/Skin_Not_Sun_Exposed_Suprapubic	NA	No	NA	7.816e-08	rs61702433	53
ENSG00000105989	WNT2	7	116916685	116963343	-1	protein_coding	7472	WNT2	0.611106	-0.774082	0	0	1	NA	0.049	CMC_SVA_cis	NA	Yes	Left_Ventricle:Mesenchymal_Stem_Cell:Mesendoderm:hESC	3.442e-11	rs10233018;rs10233018:rs10233018;rs61702433:rs61702433	53
ENSG00000077063	CTTNBP2	7	117350705	117514193	-1	protein_coding	83992	CTTNBP2	2.59916e-06	-0.293653	16	16.03	81	7.29726e-27	2.72768e-21	TIGER/Nom_Alonso_Pancreatic_islets:Nom_InsPIRE_Islets_Gene_eQTLs_Nominal_Pvalues:EyeGEx:eQTLcatalogue/BLUEPRINT_ge_monocyte:eQTLcatalogue/TwinsUK_ge_skin:PsychENCODE_eQTLs:CMC_SVA_cis:GTEx/v8/Adipose_Subcutaneous:GTEx/v8/Brain_Cerebellum:GTEx/v8/Colon_Sigmoid:GTEx/v8/Muscle_Skeletal:GTEx/v8/Nerve_Tibial:GTEx/v8/Ovary:GTEx/v8/Cells_Cultured_fibroblasts:GTEx/v8/Skin_Not_Sun_Exposed_Suprapubic:GTEx/…	NA	Yes	Aorta:Left_Ventricle:IMR90:Mesenchymal_Stem_Cell:Mesendoderm:Trophoblast-like_Cell:hESC	3.442e-11	rs61702433;rs10233018;rs10233018:rs10233018;rs61702433:rs61702433	53
ENSG00000128534	NAA38	7	117824086	117832878	1	protein_coding	51691	NAA38	0.00827246	0.525164	0	0	78	3.6986e-58	0	eQTLcatalogue/CEDAR_T-cell_CD4:eQTLcatalogue/Fairfax_2014_naive:eQTLcatalogue/GENCORD_ge_T-cell:eQTLGen_cis_eQTLs:GTEx/v8/Whole_Blood	NA	Yes	Fetal_Cortex:IMR90:Mesenchymal_Stem_Cell:Mesendoderm:Trophoblast-like_Cell:hESC	3.442e-11	rs10233018;rs61702433;rs10233018:rs10233018;rs61702433:rs61702433	53
ENSG00000106013	ANKRD7	7	117854727	117882785	1	protein_coding	56311	ANKRD7	0.00752457	-0.162801	0	0	1	0.000154363	1.07744e-09	GTEx/v8/Esophagus_Muscularis	NA	Yes	Fetal_Cortex:Aorta:Left_Ventricle:GM12878:IMR90:Mesenchymal_Stem_Cell:Mesendoderm:Trophoblast-like_Cell:hESC	3.442e-11	rs10233018;rs10233018:rs10233018;rs61702433:rs61702433	53
ENSG00000106304	SPAM1	7	123565286	123611468	1	protein_coding	6677	SPAM1	1.2437e-06	-0.131961	0	0	11	2.68488e-18	1.62319e-10	xQTLServer_eQTLs	NA	No	NA	0.0002547	rs62262722;rs7617480	24
ENSG00000080802	CNOT4	7	135046547	135194875	-1	protein_coding	4850	CNOT4	0.996014	-0.890483	33	16.34	17	8.07908e-09	1.77106e-05	eQTLGen_cis_eQTLs:BIOSQTL/BIOS_eQTL_geneLevel	NA	Yes	Adult_Cortex:Fetal_Cortex:Mesenchymal_Stem_Cell:Mesendoderm	4.62e-09	rs2551767	54
ENSG00000155561	NUP205	7	135242667	135333505	1	protein_coding	23165	NUP205	0.999999	-0.153535	2	3.047	22	1.6303e-27	0	eQTLcatalogue/BLUEPRINT_ge_T-cell:eQTLcatalogue/HipSci_ge_iPSC:eQTLGen_cis_eQTLs:BIOSQTL/BIOS_eQTL_geneLevel:CMC_SVA_cis:GTEx/v8/Skin_Sun_Exposed_Lower_leg:GTEx/v8/Spleen	NA	Yes	IMR90:Mesenchymal_Stem_Cell:Mesendoderm:hESC	4.62e-09	rs2551767	54
ENSG00000243317	C7orf73	7	135347244	135378166	1	protein_coding	101930655	C7orf73	NA	-0.612504	0	0	39	6.3958e-179	0	TIGER/Nom_Alonso_Pancreatic_islets:EyeGEx:eQTLcatalogue/Alasoo_2018_ge_macrophage_IFNg:eQTLcatalogue/Alasoo_2018_ge_macrophage_naive:eQTLcatalogue/BLUEPRINT_ge_monocyte:eQTLcatalogue/BrainSeq_ge_brain:eQTLcatalogue/GENCORD_ge_fibroblast:eQTLcatalogue/GENCORD_ge_LCL:eQTLcatalogue/GENCORD_ge_T-cell:eQTLcatalogue/GEUVADIS_ge_LCL:eQTLcatalogue/HipSci_ge_iPSC:eQTLcatalogue/Lepik_2017_ge_blood:eQTLcata…	NA	Yes	Adult_Cortex:Fetal_Cortex:GM12878:IMR90:Mesenchymal_Stem_Cell:Mesendoderm:Trophoblast-like_Cell:hESC	4.62e-09	rs2551767	54
ENSG00000164707	SLC13A4	7	135365985	135414006	-1	protein_coding	26266	SLC13A4	0.915551	0.123871	0	0	35	2.4267e-73	0	TIGER/Nom_Alonso_Pancreatic_islets:eQTLcatalogue/GENCORD_ge_fibroblast:eQTLcatalogue/GENCORD_ge_LCL:eQTLcatalogue/GENCORD_ge_T-cell:eQTLcatalogue/Quach_2016_ge_monocyte_LPS:eQTLcatalogue/Quach_2016_ge_monocyte_naive:eQTLcatalogue/Quach_2016_ge_monocyte_Pam3CSK4:eQTLcatalogue/Quach_2016_ge_monocyte_R848:eQTLcatalogue/TwinsUK_ge_blood:eQTLcatalogue/TwinsUK_ge_fat:eQTLcatalogue/TwinsUK_ge_LCL:eQTLca…	NA	Yes	Mesenchymal_Stem_Cell:Mesendoderm:hESC	4.62e-09	rs2551767	54
ENSG00000189320	FAM180A	7	135413096	135433594	-1	protein_coding	389558	FAM180A	0.337078	-0.00839312	0	0	8	1.97198e-05	6.05441e-41	GTEx/v8/Heart_Left_Ventricle	NA	Yes	Mesenchymal_Stem_Cell:Mesendoderm:hESC	4.62e-09	rs2551767	54
ENSG00000155093	PTPRN2	7	157331750	158380480	-1	protein_coding	5799	PTPRN2	0.0165572	0.264797	1	2.954	40	4.05632e-09	3.95138e-09	eQTLcatalogue/BrainSeq_ge_brain:CMC_SVA_cis:GTEx/v8/Brain_Cortex:GTEx/v8/Brain_Frontal_Cortex_BA9:GTEx/v8/Nerve_Tibial:GTEx/v7/Nerve_Tibial	NA	Yes	Adult_Cortex:IMR90:hESC	4.06e-08	rs751996	55
ENSG00000146918	NCAPG2	7	158424003	158497520	-1	protein_coding	54892	NCAPG2	0.975711	NA	25	10.6	90	3.6867e-58	0	TIGER/Nom_Alonso_Pancreatic_islets:EyeGEx:eQTLcatalogue/CEDAR_T-cell_CD4:eQTLcatalogue/CEDAR_T-cell_CD8:eQTLcatalogue/Fairfax_2014_naive:eQTLcatalogue/Lepik_2017_ge_blood:eQTLcatalogue/TwinsUK_ge_fat:PsychENCODE_eQTLs:eQTLGen_cis_eQTLs:BIOSQTL/BIOS_eQTL_geneLevel:CMC_SVA_cis:CMC_NoSVA_cis:GTEx/v8/Adipose_Subcutaneous:GTEx/v8/Adrenal_Gland:GTEx/v8/Whole_Blood:GTEx/v8/Artery_Tibial:GTEx/v8/Brain_Ce…	NA	Yes	Left_Ventricle:GM12878:IMR90:Mesenchymal_Stem_Cell:Mesendoderm:Trophoblast-like_Cell:hESC	4.06e-08	rs751996	55
ENSG00000117868	ESYT2	7	158523686	158622944	-1	protein_coding	57488	ESYT2	0.00844095	3.92878	58	14.26	98	3.27170000000001e-310	0	TIGER/Nom_Alonso_Pancreatic_islets:Nom_InsPIRE_Islets_Gene_eQTLs_Nominal_Pvalues:eQTLcatalogue/Alasoo_2018_ge_macrophage_naive:eQTLcatalogue/BLUEPRINT_ge_monocyte:eQTLcatalogue/BLUEPRINT_ge_neutrophil:eQTLcatalogue/BLUEPRINT_ge_T-cell:eQTLcatalogue/CEDAR_B-cell_CD19:eQTLcatalogue/CEDAR_monocyte_CD14:eQTLcatalogue/CEDAR_neutrophil_CD15:eQTLcatalogue/Fairfax_2012_B-cell_CD19:eQTLcatalogue/Fairfax_2…	NA	Yes	Promoter_anchored_loops:IMR90:Mesenchymal_Stem_Cell	4.06e-08	rs751996	55
ENSG00000126870	WDR60	7	158649269	158749438	1	protein_coding	55112	WDR60	2.00914e-07	1.05777	7	4.584	96	3.27170000000001e-310	0	TIGER/Nom_Alonso_Pancreatic_islets:EyeGEx:eQTLcatalogue/Alasoo_2018_ge_macrophage_IFNg_Salmonella:eQTLcatalogue/Alasoo_2018_ge_macrophage_naive:eQTLcatalogue/BLUEPRINT_ge_monocyte:eQTLcatalogue/BLUEPRINT_ge_T-cell:eQTLcatalogue/CEDAR_monocyte_CD14:eQTLcatalogue/CEDAR_T-cell_CD4:eQTLcatalogue/Fairfax_2012_B-cell_CD19:eQTLcatalogue/Fairfax_2014_IFN24:eQTLcatalogue/Fairfax_2014_LPS24:eQTLcatalogue/F…	NA	Yes	Adult_Cortex:Left_Ventricle:IMR90:Mesenchymal_Stem_Cell	4.06e-08	rs751996	55
ENSG00000106018	VIPR2	7	158820866	158937649	-1	protein_coding	7434	VIPR2	9.34379e-07	0.717005	0	0	15	2.15262e-06	3.99868e-39	EyeGEx:PsychENCODE_eQTLs:GTEx/v8/Muscle_Skeletal:GTEx/v8/Pancreas:GTEx/v8/Testis:GTEx/v7/Muscle_Skeletal	NA	Yes	IMR90:Mesenchymal_Stem_Cell:Mesendoderm:Trophoblast-like_Cell:hESC	4.06e-08	rs751996	55
ENSG00000036448	MYOM2	8	1993155	2113475	1	protein_coding	9172	MYOM2	1.48718e-55	-0.0805482	0	0	1	3.6602e-06	0.025634	eQTLGen_trans_eQTLs	NA	No	NA	0.02339	rs301806	1
ENSG00000173273	TNKS	8	9413424	9639856	1	protein_coding	8658	TNKS	0.777116	1.63727	0	0	46	NA	0.009	CMC_SVA_cis	NA	No	NA	7.491e-09	rs2009619;rs17708090	56
ENSG00000175806	MSRA	8	9911778	10286401	1	protein_coding	4482	MSRA	1.69976e-06	0.60153	83	20.6	66	3.27170000000001e-310	0	eQTLcatalogue/BLUEPRINT_ge_T-cell:eQTLcatalogue/CEDAR_B-cell_CD19:eQTLcatalogue/CEDAR_T-cell_CD4:eQTLcatalogue/CEDAR_T-cell_CD8:eQTLcatalogue/Fairfax_2012_B-cell_CD19:eQTLcatalogue/Fairfax_2014_IFN24:eQTLcatalogue/Fairfax_2014_naive:eQTLcatalogue/Kasela_2017_T-cell_CD4:eQTLcatalogue/Lepik_2017_ge_blood:eQTLGen_cis_eQTLs:BIOSQTL/BIOS_eQTL_geneLevel:GTEx/v8/Adipose_Subcutaneous:GTEx/v8/Artery_Tibia…	NA	Yes	Promoter_anchored_loops:Adult_Cortex:Fetal_Cortex:Aorta:Left_Ventricle:Liver:Psoas:Right_Ventricle:Spleen:GM12878:IMR90:Mesenchymal_Stem_Cell:Mesendoderm:Trophoblast-like_Cell:hESC	7.491e-09	rs2009619;rs17708090;rs2009619:rs17708090:rs2009619	56
ENSG00000184647	PRSS55	8	10383056	10411676	1	protein_coding	203074	PRSS55	1.23357e-08	0.255257	0	0	1	2.52376e-07	2.46191e-42	GTEx/v8/Brain_Cerebellar_Hemisphere:GTEx/v8/Testis	NA	No	NA	0.03912	rs17708090	56
ENSG00000183638	RP1L1	8	10463859	10569697	-1	protein_coding	94137	RP1L1	NA	1.24497	0	0	23	9.15489e-12	0	BIOSQTL/BIOS_eQTL_geneLevel:GTEx/v8/Nerve_Tibial:GTEx/v8/Thyroid:GTEx/v7/Thyroid	NA	Yes	Mesendoderm:Trophoblast-like_Cell	2.385e-08	rs17708090;rs2009619;rs17708090:rs17708090	56
ENSG00000171056	SOX7	8	10581278	10697357	-1	protein_coding	83595	SOX7	0.131242	0.63803	0	0	7	2.0646e-06	0.00601677	eQTLGen_cis_eQTLs	NA	Yes	IMR90:Mesenchymal_Stem_Cell:Mesendoderm:Trophoblast-like_Cell	1.86e-07	rs2009619;rs17708090;rs17708090:rs17708090	56
ENSG00000254093	PINX1	8	10622473	10697394	-1	protein_coding	54984	PINX1	4.94279e-09	-0.0639355	0	0	5	4.76549e-05	0.00439477	PsychENCODE_eQTLs	NA	Yes	IMR90:Mesenchymal_Stem_Cell:Mesendoderm:Trophoblast-like_Cell	7.565e-07	rs17708090;rs2009619;rs17708090:rs17708090	56
ENSG00000171044	XKR6	8	10753555	11058875	-1	protein_coding	286046	XKR6	0.956777	0.199431	0	0	9	3.1109e-07	0.00101731	eQTLcatalogue/Kasela_2017_T-cell_CD4:PsychENCODE_eQTLs:DICE/T_CD8_naive:eQTLGen_cis_eQTLs:CMC_SVA_cis	NA	Yes	IMR90:Mesenchymal_Stem_Cell:Trophoblast-like_Cell	1.949e-08	rs17708090;rs2009619;rs17708090:rs17708090	56
ENSG00000104643	MTMR9	8	11141925	11185646	1	protein_coding	66036	MTMR9	0.210866	1.57932	0	0	23	9.46087e-07	8.54698e-28	eQTLcatalogue/CEDAR_T-cell_CD4:GTEx/v8/Colon_Sigmoid:GTEx/v8/Colon_Transverse:GTEx/v8/Nerve_Tibial	NA	Yes	Mesenchymal_Stem_Cell	1.949e-08	rs17708090;rs2009619;rs17708090:rs17708090	56
ENSG00000177710	SLC35G5	8	11188397	11189717	1	protein_coding	646000	SLC35G5	0.0274846	0.517542	0	0	32	2.857e-15	0	eQTLGen_cis_eQTLs:GTEx/v8/Thyroid	NA	Yes	IMR90:Mesenchymal_Stem_Cell	7.491e-09	rs17708090;rs2009619;rs17708090:rs17708090;rs2009619:rs2009619	56
ENSG00000184608	C8orf12	8	11225911	11296167	1	protein_coding	83656	C8orf12	0.311269	NA	0	0	18	3.65821e-07	0.00030405	GTEx/v8/Testis:GTEx/v7/Brain_Cerebellum:GTEx/v7/Lung:GTEx/v6/Muscle_Skeletal	NA	No	NA	1.195e-08	rs17708090;rs2009619	56
ENSG00000154319	FAM167A	8	11278972	11332224	-1	protein_coding	83648	FAM167A	0.000192998	0.911878	0	0	12	1.6082e-114	0	TIGER/Nom_Alonso_Pancreatic_islets:eQTLGen_cis_eQTLs:CMC_SVA_cis:CMC_SVA_trans:CMC_NoSVA_cis	NA	No	NA	1.857e-07	rs17708090;rs2009619	56
ENSG00000136573	BLK	8	11351510	11422113	1	protein_coding	640	BLK	2.86166e-07	-0.273662	0	0	1	3.1877e-08	0.00042231	eQTLGen_trans_eQTLs	NA	No	NA	1.391e-05	rs9074	107
ENSG00000154359	LONRF1	8	12579403	12613582	-1	protein_coding	91694	LONRF1	0.919752	0.132461	0	0	2	6.1642e-07	0.005404	eQTLGen_trans_eQTLs	NA	No	NA	0.0007836	rs13054099;rs5751069	109
ENSG00000175445	LPL	8	19759228	19824769	1	protein_coding	4023	LPL	3.33728e-06	1.04718	0	0	11	NA	0.009	CMC_SVA_cis:CMC_NoSVA_cis	NA	No	NA	1.401e-08	rs7017108	57
ENSG00000104660	LEPROTL1	8	29952914	30034724	1	protein_coding	23484	LEPROTL1	0.62232	0.103764	0	0	1	5.54e-07	0.00490114	eQTLGen_trans_eQTLs	NA	No	NA	0.03871	rs13054099	109
ENSG00000157168	NRG1	8	31496902	32622548	1	protein_coding	3084	NRG1	0.947799	NA	124	15.42	39	1.5508e-22	0	eQTLGen_cis_eQTLs	NA	Yes	Liver:IMR90:Mesenchymal_Stem_Cell:Mesendoderm:Neural_Progenitor_Cell:Trophoblast-like_Cell:hESC	6.333e-09	rs2085998;rs12546915;rs2085998:rs12546915:rs12546915	58
ENSG00000176209	SMIM19	8	42396298	42409603	1	protein_coding	114926	SMIM19	0.323328	0.309359	0	0	3	1.4731e-12	0	eQTLGen_trans_eQTLs	NA	No	NA	0.0007836	rs13054099;rs5751069	109
ENSG00000156804	FBXO32	8	124510129	124553446	-1	protein_coding	114907	FBXO32	0.972568	0.0163737	0	0	2	3.2116e-06	0.0229031	eQTLGen_trans_eQTLs	NA	No	NA	0.0007836	rs13054099;rs5751069	109
ENSG00000168263	KCNV2	9	2717502	2730037	1	protein_coding	169522	KCNV2	6.2711e-17	0.980498	0	0	1	4.61332e-05	0.0363403	EyeGEx	NA	No	NA	1.046e-08	rs7035623	59
ENSG00000080608	KIAA0020	9	2720469	2844241	-1	protein_coding	9933	KIAA0020	1.66222e-14	0.234295	0	0	1	2.67171e-05	0.0141549	GTEx/v8/Prostate	NA	Yes	Mesendoderm:hESC	7.477e-09	rs7035623	59
ENSG00000153707	PTPRD	9	8314246	10612723	-1	protein_coding	5789	PTPRD	1	-0.573834	0	0	11	2.26986e-08	5.5971e-05	CMC_NoSVA_cis:GTEx/v8/Esophagus_Muscularis:GTEx/v6/Esophagus_Muscularis	NA	Yes	Fetal_Cortex:Left_Ventricle:Liver:IMR90:Mesenchymal_Stem_Cell:Mesendoderm:Neural_Progenitor_Cell:Trophoblast-like_Cell:hESC	3.946e-15	rs10809504;rs10809464;rs10809464:rs56072039;rs10809464:rs1931388:rs10809504;rs1348384;rs10809464:rs10809504:rs72696269:rs56072039:rs10809464:rs56072039;rs1931388;rs10809464:rs56021312:rs72696269;rs56021312:rs10809504;rs56021312:rs56072039;rs56021312:rs1931388;rs10809504:rs56072039;rs72696269;rs1931388:rs56072039;rs56021312;rs10809464:rs1931388;rs72696269:rs56072039;rs10809504:rs1348384;rs1348384:…	60
ENSG00000107165	TYRP1	9	12685439	12710290	1	protein_coding	7306	TYRP1	4.48056e-21	0.242775	0	0	60	1.19375e-06	0.00310396	TIGER/Nom_Alonso_Pancreatic_islets:GTEx/v8/Testis	NA	Yes	Mesenchymal_Stem_Cell:Mesendoderm:hESC	7.889e-14	rs10809504;rs56072039;rs72696269;rs10809504:rs10809464:rs56072039;rs1931388;rs10809464:rs10809504;rs1348384;rs10809464:rs72696269:rs56072039:rs1931388:rs56072039;rs10809504:rs56072039;rs72696269:rs56021312:rs72696269;rs56021312:rs10809504;rs56021312:rs56072039;rs1348384:rs10809504;rs10809464:rs56072039;rs10809464	60
ENSG00000153714	LURAP1L	9	12775020	12822130	1	protein_coding	286343	LURAP1L	0.0766243	0.220603	0	0	11	5.20401e-06	1.40759e-05	PsychENCODE_eQTLs:GTEx/v8/Skin_Sun_Exposed_Lower_leg:GTEx/v7/Skin_Sun_Exposed_Lower_leg	NA	No	NA	1.598e-08	rs56072039;rs10809504	60
ENSG00000159921	GNE	9	36214438	36277053	-1	protein_coding	10020	GNE	4.85674e-07	0.685671	0	0	2	0.000422354	0.0287579	PsychENCODE_eQTLs	NA	No	NA	3.57e-09	rs1329571	62
ENSG00000196092	PAX5	9	36833272	37034103	-1	protein_coding	5079	PAX5	0.984244	-0.198032	66	17.6	27	8.88496e-11	0	BIOSQTL/BIOS_eQTL_geneLevel	NA	Yes	Aorta:Liver:Spleen:GM12878:IMR90:Mesenchymal_Stem_Cell:Mesendoderm:Neural_Progenitor_Cell:Trophoblast-like_Cell:hESC	3.76e-10	rs7867479;rs1329572;rs60703636;rs1329571;rs60703636:rs7867479:rs7867479;rs1329572:rs1329572	62
ENSG00000147905	ZCCHC7	9	37120536	37358146	1	protein_coding	84186	ZCCHC7	3.37485e-09	0.160586	54	20.1	108	1.9681e-39	0	eQTLGen_cis_eQTLs:BIOSQTL/BIOS_eQTL_geneLevel:CMC_SVA_cis:CMC_NoSVA_cis	NA	Yes	Promoter_anchored_loops:Adult_Cortex:Fetal_Cortex:Aorta:Left_Ventricle:Liver:GM12878:IMR90:Mesenchymal_Stem_Cell:Mesendoderm:Trophoblast-like_Cell:hESC	3.76e-10	rs60703636;rs7867479;rs1329572;rs1329571;rs60703636:rs7867479:rs7867479;rs1329572:rs1329572:rs1329572;rs1329571:rs1329571	62
ENSG00000137106	GRHPR	9	37422663	37436987	1	protein_coding	9380	GRHPR	0.00013344	0.724692	0	0	32	2.5913e-43	0	eQTLGen_cis_eQTLs:BIOSQTL/BIOS_eQTL_geneLevel	NA	Yes	Spleen:GM12878:IMR90:Mesenchymal_Stem_Cell:Mesendoderm:Trophoblast-like_Cell:hESC	3.76e-10	rs7867479;rs60703636;rs60703636:rs7867479:rs7867479;rs1329572:rs1329572:rs1329572;rs1329571:rs1329571	62
ENSG00000168795	ZBTB5	9	37438111	37465396	-1	protein_coding	9925	ZBTB5	0.798455	-0.923732	0	0	61	1.3782e-09	1.30941e-05	eQTLGen_cis_eQTLs:BIOSQTL/BIOS_eQTL_geneLevel:GTEx/v7/Adrenal_Gland	NA	Yes	Adult_Cortex:Fetal_Cortex:GM12878:IMR90:Mesenchymal_Stem_Cell:Mesendoderm	3.76e-10	rs60703636;rs60703636:rs7867479:rs7867479;rs1329572:rs1329572:rs1329572;rs1329571:rs1329571	62
ENSG00000137054	POLR1E	9	37485932	37503694	1	protein_coding	64425	POLR1E	1.02879e-05	0.231738	0	0	101	3.5588e-40	0	eQTLcatalogue/Fairfax_2014_IFN24:eQTLcatalogue/Fairfax_2014_LPS24:eQTLGen_cis_eQTLs:CMC_SVA_cis:CMC_NoSVA_cis:GTEx/v8/Cells_Cultured_fibroblasts	NA	Yes	GM12878:IMR90	3.76e-10	rs1329572;rs1329571;rs7867479;rs60703636;rs1329572:rs60703636:rs1329572;rs1329571:rs1329571:rs7867479:rs7867479	62
ENSG00000147912	FBXO10	9	37510889	37588871	-1	protein_coding	26267	FBXO10	0.00149253	-1.03811	0	0	8	6.0743e-08	5.64239e-05	BIOSQTL/BIOS_eQTL_geneLevel	NA	No	NA	1.661e-08	rs60703636	62
ENSG00000256966	RP11-613M10.8	9	37512544	37592466	-1	protein_coding	NA	NA	NA	NA	0	0	8	6.0743e-08	5.64239e-05	BIOSQTL/BIOS_eQTL_geneLevel	NA	No	NA	1.661e-08	rs60703636	62
ENSG00000175768	TOMM5	9	37582643	37592639	-1	protein_coding	401505	TOMM5	0.588882	0.0509233	0	0	16	4.936e-08	0.000202455	eQTLGen_cis_eQTLs	NA	No	NA	4.739e-10	rs1329572;rs1329571	62
ENSG00000122741	DCAF10	9	37800499	37867663	1	protein_coding	79269	DCAF10	0.967143	1.60808	0	0	1	1.85534e-05	0.00195435	GTEx/v7/Skin_Not_Sun_Exposed_Suprapubic	NA	No	NA	2.093e-08	rs60703636	62
ENSG00000165092	ALDH1A1	9	75515578	75695358	-1	protein_coding	216	ALDH1A1	0.993851	-0.0809465	0	0	4	2.3559e-08	0.00031679	eQTLGen_trans_eQTLs	NA	No	NA	1.527e-07	rs13054099;rs5751069	109
ENSG00000106723	SPIN1	9	91003334	91093609	1	protein_coding	10927	SPIN1	0.925083	-1.69696	0	0	1	3.8587e-07	0.00343046	eQTLGen_trans_eQTLs	NA	No	NA	0.03871	rs13054099	109
ENSG00000106819	ASPN	9	95218487	95244788	-1	protein_coding	54829	ASPN	0.0233215	NA	0	0	1	2.6508e-05	0.0444704	GTEx/v8/Brain_Cortex	NA	No	NA	0.01372	rs6479487	63
ENSG00000185963	BICD2	9	95473645	95527094	-1	protein_coding	23299	BICD2	0.332594	-0.97368	0	0	13	6.38587e-06	9.95345e-16	eQTLcatalogue/BLUEPRINT_ge_neutrophil:GTEx/v8/Whole_Blood	NA	No	NA	4.539e-08	rs10761240;rs6479487	63
ENSG00000127084	FGD3	9	95709733	95798518	1	protein_coding	89846	FGD3	8.70335e-06	0.0584467	0	0	49	6.2047e-08	0.000271482	eQTLGen_cis_eQTLs	NA	Yes	IMR90	2.086e-07	rs10761240;rs6479487;rs6479487:rs10761240:rs6479487	63
ENSG00000157303	SUSD3	9	95820989	95847420	1	protein_coding	203328	SUSD3	0.00319514	NA	0	0	3	6.8648e-09	4.51496e-05	eQTLGen_cis_eQTLs	NA	Yes	IMR90	3.304e-06	rs6479487;rs6479487:rs10761240:rs6479487;rs10761240	63
ENSG00000165233	C9orf89	9	95858500	95875565	1	protein_coding	84270	C9orf89	5.82582e-05	NA	0	0	113	2.1996e-25	0	DICE/T_CD4_TH1:eQTLGen_cis_eQTLs:GTEx/v8/Nerve_Tibial	NA	Yes	Promoter_anchored_loops:Left_Ventricle:IMR90:Mesenchymal_Stem_Cell	1.574e-08	rs10761240;rs6479487;rs6479487:rs10761240:rs6479487	63
ENSG00000131669	NINJ1	9	95883771	95896570	-1	protein_coding	4814	NINJ1	0.0612939	0.727531	0	0	129	1.6883e-39	0	EyeGEx:eQTLGen_cis_eQTLs:GTEx/v8/Whole_Blood:GTEx/v8/Cells_Cultured_fibroblasts:GTEx/v8/Testis:GTEx/v7/Cells_Transformed_fibroblasts	NA	Yes	Promoter_anchored_loops:Left_Ventricle:IMR90:Mesendoderm	1.574e-08	rs10761240;rs6479487;rs10761240:rs6479487:rs6479487	63
ENSG00000165238	WNK2	9	95947198	96082854	1	protein_coding	65268	WNK2	0.792762	NA	0	0	125	1.89414e-16	0	eQTLGen_cis_eQTLs:BIOSQTL/BIOS_eQTL_geneLevel:GTEx/v8/Esophagus_Mucosa:GTEx/v8/Skin_Not_Sun_Exposed_Suprapubic:GTEx/v8/Skin_Sun_Exposed_Lower_leg:GTEx/v8/Thyroid:GTEx/v7/Skin_Not_Sun_Exposed_Suprapubic:GTEx/v7/Skin_Sun_Exposed_Lower_leg:GTEx/v7/Thyroid	NA	Yes	Spleen:IMR90:Mesenchymal_Stem_Cell:Mesendoderm:hESC	1.574e-08	rs10761240;rs6479487;rs6479487:rs10761240:rs6479487	63
ENSG00000204352	C9orf129	9	96080481	96108696	-1	protein_coding	445577	C9orf129	0.375839	-0.0524508	0	0	54	1.89414e-16	0	eQTLcatalogue/HipSci_ge_iPSC:BIOSQTL/BIOS_eQTL_geneLevel:GTEx/v8/Testis:GTEx/v7/Testis	NA	Yes	IMR90:Mesendoderm:Neural_Progenitor_Cell:Trophoblast-like_Cell:hESC	1.574e-08	rs6479487;rs10761240;rs6479487:rs10761240:rs6479487	63
ENSG00000188938	FAM120AOS	9	96208776	96215874	-1	protein_coding	158293	FAM120AOS	0.514391	0.00743144	17	10.44	175	4.8318e-69	0	TIGER/Nom_Alonso_Pancreatic_islets:EyeGEx:eQTLcatalogue/BLUEPRINT_ge_monocyte:eQTLcatalogue/BLUEPRINT_ge_neutrophil:eQTLcatalogue/BLUEPRINT_ge_T-cell:eQTLcatalogue/CEDAR_neutrophil_CD15:eQTLcatalogue/Fairfax_2014_IFN24:eQTLcatalogue/Fairfax_2014_LPS2:eQTLcatalogue/Fairfax_2014_naive:eQTLcatalogue/GEUVADIS_ge_LCL:eQTLcatalogue/HipSci_ge_iPSC:eQTLcatalogue/Lepik_2017_ge_blood:eQTLcatalogue/Naranbha…	NA	Yes	Promoter_anchored_loops:Adult_Cortex:Left_Ventricle:Liver:IMR90:Mesenchymal_Stem_Cell:Mesendoderm:Trophoblast-like_Cell:hESC	1.574e-08	rs6479487;rs10761240;rs10761240:rs6479487:rs6479487	63
ENSG00000048828	FAM120A	9	96214004	96328397	1	protein_coding	23196	FAM120A	0.999907	-0.298117	99	22.4	162	3.746e-25	0	eQTLcatalogue/Fairfax_2012_B-cell_CD19:eQTLcatalogue/Fairfax_2014_naive:eQTLGen_cis_eQTLs:GTEx/v8/Esophagus_Mucosa:GTEx/v8/Esophagus_Muscularis:GTEx/v8/Thyroid:GTEx/v7/Esophagus_Mucosa	NA	Yes	Promoter_anchored_loops:Adult_Cortex:Left_Ventricle:Liver:IMR90:Mesenchymal_Stem_Cell:Mesendoderm:Trophoblast-like_Cell:hESC	1.574e-08	rs10761240;rs6479487;rs10761240:rs6479487:rs6479487	63
ENSG00000197724	PHF2	9	96338689	96441869	1	protein_coding	5253	PHF2	0.994132	0.745198	97	10.58	157	5.2598e-39	0	TIGER/Nom_Alonso_Pancreatic_islets:EyeGEx:eQTLcatalogue/BLUEPRINT_ge_monocyte:PsychENCODE_eQTLs:eQTLGen_cis_eQTLs:BIOSQTL/BIOS_eQTL_geneLevel:GTEx/v8/Brain_Cerebellum:GTEx/v8/Colon_Sigmoid:GTEx/v8/Esophagus_Muscularis:GTEx/v8/Heart_Left_Ventricle:GTEx/v8/Cells_Cultured_fibroblasts:GTEx/v8/Testis:GTEx/v8/Thyroid:GTEx/v7/Esophagus_Gastroesophageal_Junction:GTEx/v7/Esophagus_Muscularis:GTEx/v7/Nerve…	NA	Yes	Left_Ventricle:Liver:GM12878:IMR90:Mesenchymal_Stem_Cell:Mesendoderm:Trophoblast-like_Cell:hESC	1.574e-08	rs6479487;rs10761240;rs6479487:rs10761240:rs6479487	63
ENSG00000131668	BARX1	9	96713905	96717654	-1	protein_coding	56033	BARX1	0.690516	NA	0	0	7	7.53046e-08	6.85944e-10	GTEx/v8/Colon_Transverse:GTEx/v8/Small_Intestine_Terminal_Ileum:GTEx/v7/Colon_Transverse	NA	No	NA	0.01621	rs10761240	63
ENSG00000158079	PTPDC1	9	96793076	96872138	1	protein_coding	138639	PTPDC1	0.00209572	-0.264988	0	0	17	6.28e-05	3.39404e-06	GTEx/v8/Skin_Sun_Exposed_Lower_leg:GTEx/v7/Skin_Sun_Exposed_Lower_leg	NA	No	NA	NA	rs6479487	63
ENSG00000175787	ZNF169	9	97021593	97063736	1	protein_coding	169841	ZNF169	1.74928e-09	-0.405415	0	0	3	4.16435e-06	3.13533e-11	GTEx/v8/Cells_Cultured_fibroblasts:GTEx/v8/Skin_Not_Sun_Exposed_Suprapubic:GTEx/v7/Cells_Transformed_fibroblasts	NA	No	NA	NA	rs6479487	63
ENSG00000148110	HIATL1	9	97136833	97223324	1	protein_coding	84641	HIATL1	0.0239502	-0.606655	0	0	6	3.29487e-05	0.00154759	GTEx/v8/Brain_Anterior_cingulate_cortex_BA24	NA	Yes	Promoter_anchored_loops	2.442e-07	rs10761240;rs6479487:rs10761240	63
ENSG00000148219	ASTN2	9	119187504	120177348	-1	protein_coding	23245	ASTN2	0.989172	NA	40	13.52	0	NA	NA	NA	NA	Yes	Left_Ventricle:Liver:IMR90:Mesenchymal_Stem_Cell:Mesendoderm:Neural_Progenitor_Cell:Trophoblast-like_Cell:hESC	7.783e-10	rs1888286;rs1888286:rs1360693	64:65
ENSG00000119401	TRIM32	9	119449581	119463579	1	protein_coding	22954	TRIM32	0.0973176	-0.438257	0	0	14	2.6245e-08	0.000114635	eQTLGen_cis_eQTLs	NA	Yes	Mesendoderm:hESC	7.783e-10	rs1888286	64
ENSG00000171496	OR1L8	9	125329778	125330838	-1	protein_coding	138881	OR1L8	0.325913	0.896224	0	0	1	3.10682e-05	0.0095869	GTEx/v8/Thyroid	NA	No	NA	2.661e-05	rs7044210	66
ENSG00000136939	OR1L4	9	125486269	125487204	1	protein_coding	254973	OR1L4	0.0431651	0.115407	0	0	7	9.27986e-06	0.0171774	TIGER/Nom_Alonso_Pancreatic_islets:eQTLcatalogue/Fairfax_2012_B-cell_CD19	NA	No	NA	1.398e-06	rs7044210	66
ENSG00000171448	ZBTB26	9	125677845	125693779	-1	protein_coding	57684	ZBTB26	0.0154751	-0.96491	0	0	1	2.27471e-05	0.0244417	GTEx/v7/Brain_Cortex	NA	Yes	Left_Ventricle	0.0001448	rs7044210	66
ENSG00000011454	RABGAP1	9	125703112	125867145	1	protein_coding	23637	RABGAP1	1	1.34729	0	0	1	0.000130826	0.000525645	GTEx/v8/Lung	NA	Yes	Left_Ventricle	0.0001519	rs7044210	66
ENSG00000165209	STRBP	9	125871779	126030855	-1	protein_coding	55342	STRBP	0.999902	-1.96795	0	0	1	1.3089e-05	0.0408686	GTEx/v7/Adrenal_Gland	NA	No	NA	1.344e-06	rs7044210	66
ENSG00000148204	CRB2	9	126118449	126142603	1	protein_coding	286204	CRB2	3.46015e-05	-0.987535	0	0	2	1.77158e-07	5.98131e-11	Nom_InsPIRE_Islets_Gene_eQTLs_Nominal_Pvalues:GTEx/v8/Whole_Blood	NA	No	NA	8.474e-08	rs7044210	66
ENSG00000119522	DENND1A	9	126141933	126692431	-1	protein_coding	57706	DENND1A	0.904475	-0.0551646	223	20.9	103	5.6754e-157	0	TIGER/Nom_Alonso_Pancreatic_islets:Nom_InsPIRE_Islets_Gene_eQTLs_Nominal_Pvalues:eQTLcatalogue/Alasoo_2018_ge_macrophage_Salmonella:eQTLcatalogue/GEUVADIS_ge_LCL:eQTLcatalogue/Lepik_2017_ge_blood:eQTLGen_cis_eQTLs:BIOSQTL/BIOS_eQTL_geneLevel:CMC_SVA_cis:CMC_NoSVA_cis:GTEx/v8/Adipose_Subcutaneous:GTEx/v8/Adipose_Visceral_Omentum:GTEx/v8/Whole_Blood:GTEx/v8/Artery_Tibial:GTEx/v8/Breast_Mammary_Tiss…	NA	Yes	Adult_Cortex:Fetal_Cortex:Liver:IMR90:Mesenchymal_Stem_Cell:Mesendoderm:hESC	1.447e-09	rs7044210	66
ENSG00000106689	LHX2	9	126763949	126795580	1	protein_coding	9355	LHX2	0.94679	NA	0	0	8	4.97298e-06	0.00690367	BRAINEAC/HIPP	NA	Yes	Adult_Cortex:Fetal_Cortex:Dorsolateral_Prefrontal_Cortex:Left_Ventricle:Liver:Lung:Pancreas:Psoas:Right_Ventricle:Spleen:GM12878:IMR90:Mesenchymal_Stem_Cell:Mesendoderm:Neural_Progenitor_Cell:Trophoblast-like_Cell:hESC	1.447e-09	rs7044210	66
ENSG00000072422	RHOBTB1	10	62629196	62761198	-1	protein_coding	9886	RHOBTB1	0.00183823	-0.452042	0	0	1	1.1621e-06	0.00350223	eQTLGen_cis_eQTLs	NA	Yes	Aorta:Left_Ventricle:Liver:IMR90:Mesenchymal_Stem_Cell:Mesendoderm:Neural_Progenitor_Cell:hESC	1.802e-08	rs7898650	67
ENSG00000196932	TMEM26	10	63166401	63213208	-1	protein_coding	219623	TMEM26	1.73428e-07	-0.427367	3	11.36	5	7.56645e-05	0.0360063	GTEx/v8/Adipose_Subcutaneous	NA	Yes	Left_Ventricle:IMR90:Mesenchymal_Stem_Cell:Mesendoderm:Trophoblast-like_Cell:hESC	1.802e-08	rs7898650	67
ENSG00000183346	C10orf107	10	63422719	63526524	1	protein_coding	219621	C10orf107	0.00079093	-0.76989	6	13.12	0	NA	NA	NA	NA	Yes	Aorta:Left_Ventricle:IMR90:Mesenchymal_Stem_Cell:Mesendoderm:Trophoblast-like_Cell:hESC	1.802e-08	rs7898650	67
ENSG00000138311	ZNF365	10	64133951	64431771	1	protein_coding	22891	ZNF365	3.62115e-05	-0.151965	0	0	2	0.000153222	6.44025e-06	GTEx/v8/Thyroid	NA	Yes	Left_Ventricle:Liver:IMR90:Mesenchymal_Stem_Cell:Mesendoderm:Trophoblast-like_Cell:hESC	1.802e-08	rs7898650	67
ENSG00000185009	AP3M1	10	75881524	75910821	-1	protein_coding	26985	AP3M1	0.768618	-1.1725	0	0	37	4.7451e-48	0	eQTLGen_cis_eQTLs:GTEx/v8/Esophagus_Mucosa	NA	Yes	Adult_Cortex:Fetal_Cortex:Aorta:Left_Ventricle:Liver:Right_Ventricle:Spleen:GM12878:IMR90:Mesenchymal_Stem_Cell:Mesendoderm:Trophoblast-like_Cell:hESC	1.809e-08	rs4746270	68
ENSG00000156110	ADK	10	75910960	76469061	1	protein_coding	132	ADK	0.322841	-0.0833735	0	0	74	2.5684e-198	0	eQTLcatalogue/CEDAR_monocyte_CD14:eQTLcatalogue/Fairfax_2014_IFN24:eQTLcatalogue/Fairfax_2014_LPS24:eQTLcatalogue/Fairfax_2014_naive:eQTLGen_cis_eQTLs:GTEx/v8/Whole_Blood:GTEx/v7/Whole_Blood	NA	Yes	Adult_Cortex:Fetal_Cortex:Aorta:Left_Ventricle:Liver:Right_Ventricle:Spleen:GM12878:IMR90:Mesenchymal_Stem_Cell:Mesendoderm:Trophoblast-like_Cell:hESC	1.809e-08	rs4746270	68
ENSG00000156650	KAT6B	10	76585340	76792380	1	protein_coding	23522	KAT6B	1	-1.22404	1	1.3	33	9.50234e-06	0.00301261	CMC_NoSVA_cis:GTEx/v8/Muscle_Skeletal	NA	Yes	Fetal_Cortex:IMR90:Mesenchymal_Stem_Cell	1.009e-06	rs4746270	68
ENSG00000188716	DUPD1	10	76797594	76818272	-1	protein_coding	338599	DUPD1	1.17861e-07	-0.113151	7	6.51	87	2.63752e-30	1.88784e-24	GTEx/v8/Heart_Left_Ventricle:GTEx/v8/Muscle_Skeletal:GTEx/v7/Heart_Left_Ventricle:GTEx/v7/Muscle_Skeletal:GTEx/v6/Heart_Left_Ventricle:GTEx/v6/Muscle_Skeletal	NA	Yes	Fetal_Cortex:IMR90	1.809e-08	rs4746270	68
ENSG00000079393	DUSP13	10	76854192	76868979	-1	protein_coding	51207	DUSP13	9.9945e-08	-0.133763	27	22.7	83	8.84809e-58	2.541e-50	PsychENCODE_eQTLs:eQTLGen_cis_eQTLs:BIOSQTL/BIOS_eQTL_geneLevel:GTEx/v8/Esophagus_Mucosa:GTEx/v8/Muscle_Skeletal:GTEx/v8/Skin_Not_Sun_Exposed_Suprapubic:GTEx/v8/Skin_Sun_Exposed_Lower_leg:GTEx/v8/Testis:GTEx/v7/Muscle_Skeletal:GTEx/v7/Testis:GTEx/v6/Testis	NA	Yes	IMR90	1.809e-08	rs4746270	68
ENSG00000156671	SAMD8	10	76859344	76941881	1	protein_coding	142891	SAMD8	0.0043517	-1.23015	55	22.7	75	9.9133e-10	4.19483e-06	TIGER/Nom_Alonso_Pancreatic_islets:PsychENCODE_eQTLs:eQTLGen_cis_eQTLs:BIOSQTL/BIOS_eQTL_geneLevel:GTEx/v8/Esophagus_Gastroesophageal_Junction:GTEx/v8/Nerve_Tibial:GTEx/v8/Cells_Cultured_fibroblasts:GTEx/v8/Thyroid:GTEx/v7/Nerve_Tibial:GTEx/v7/Cells_Transformed_fibroblasts:GTEx/v7/Thyroid:GTEx/v6/Cells_Transformed_fibroblasts	NA	Yes	Adult_Cortex:Fetal_Cortex:IMR90	1.809e-08	rs4746270	68
ENSG00000165637	VDAC2	10	76969912	76991206	1	protein_coding	7417	VDAC2	0.819301	NA	5	10.55	94	5.47153e-54	0	eQTLcatalogue/Alasoo_2018_ge_macrophage_IFNg_Salmonella:eQTLcatalogue/BLUEPRINT_ge_monocyte:eQTLcatalogue/BLUEPRINT_ge_neutrophil:eQTLcatalogue/BLUEPRINT_ge_T-cell:eQTLcatalogue/GENCORD_ge_fibroblast:eQTLcatalogue/GEUVADIS_ge_LCL:eQTLcatalogue/Lepik_2017_ge_blood:eQTLcatalogue/Quach_2016_ge_monocyte_IAV:eQTLcatalogue/Quach_2016_ge_monocyte_LPS:eQTLcatalogue/Quach_2016_ge_monocyte_naive:eQTLcatalo…	NA	Yes	Adult_Cortex:Fetal_Cortex:GM12878:IMR90:Mesenchymal_Stem_Cell	1.809e-08	rs4746270	68
ENSG00000165644	COMTD1	10	76993727	76995788	-1	protein_coding	118881	COMTD1	5.22497e-06	-0.0880774	1	1.349	100	7.2882e-129	0	eQTLcatalogue/CEDAR_T-cell_CD4:eQTLcatalogue/CEDAR_T-cell_CD8:eQTLcatalogue/Kasela_2017_T-cell_CD4:eQTLcatalogue/Kasela_2017_T-cell_CD8:PsychENCODE_eQTLs:eQTLGen_cis_eQTLs:BIOSQTL/BIOS_eQTL_geneLevel:GTEx/v8/Whole_Blood:GTEx/v8/Artery_Aorta:GTEx/v8/Artery_Tibial:GTEx/v8/Esophagus_Mucosa:GTEx/v8/Esophagus_Muscularis:GTEx/v8/Lung:GTEx/v8/Nerve_Tibial:GTEx/v8/Cells_Cultured_fibroblasts:GTEx/v8/Skin_…	NA	Yes	Adult_Cortex:Fetal_Cortex:GM12878:IMR90:Mesenchymal_Stem_Cell	1.809e-08	rs4746270	68
ENSG00000165655	ZNF503	10	77157588	77161664	-1	protein_coding	84858	ZNF503	0.887882	-0.94488	0	0	55	7.8339e-25	0	eQTLGen_cis_eQTLs	NA	No	NA	1.009e-06	rs4746270	68
ENSG00000148655	C10orf11	10	77360998	78319925	1	protein_coding	83938	C10orf11	0.0410566	0.0298164	0	0	22	1.9235e-30	0	eQTLGen_cis_eQTLs	NA	No	NA	0.0004105	rs4746270	68
ENSG00000059573	ALDH18A1	10	97365696	97416463	-1	protein_coding	5832	ALDH18A1	0.855933	-0.050105	0	0	1	2.7535e-06	0.0201891	eQTLGen_trans_eQTLs	NA	No	NA	0.03871	rs13054099	109
ENSG00000107960	OBFC1	10	105642300	105677963	-1	protein_coding	79991	OBFC1	1.3253e-05	NA	0	0	4	3.26521e-05	4.07852e-11	CMC_SVA_cis:GTEx/v8/Muscle_Skeletal	NA	No	NA	4.03e-05	rs10786831;rs6584635	69
ENSG00000065618	COL17A1	10	105791044	105845760	-1	protein_coding	1308	COL17A1	5.82447e-11	-0.457013	0	0	12	2.86213e-05	0.0409803	GTEx/v8/Esophagus_Gastroesophageal_Junction	NA	No	NA	1.505e-10	rs6584635	69
ENSG00000197748	WDR96	10	105889646	105992120	-1	protein_coding	80217	WDR96	1.11043e-14	-0.15501	1	5.937	10	0.000235011	8.09988e-14	CMC_SVA_cis:GTEx/v8/Cells_Cultured_fibroblasts	NA	No	NA	1.443e-07	rs6584635;rs10786831;rs2451466	69
ENSG00000148834	GSTO1	10	105995114	106027217	1	protein_coding	9446	GSTO1	0.0150378	0.556924	0	0	3	7.44546e-08	3.54841e-19	GTEx/v8/Cells_EBV-transformed_lymphocytes:GTEx/v8/Whole_Blood:GTEx/v7/Cells_EBV-transformed_lymphocytes	NA	No	NA	NA	rs6584635;rs10786831	69
ENSG00000065621	GSTO2	10	106028631	106064703	1	protein_coding	119391	GSTO2	1.66971e-07	0.0298912	0	0	35	8.96389e-06	1.90391e-09	TIGER/Nom_Alonso_Pancreatic_islets:PsychENCODE_eQTLs:GTEx/v8/Muscle_Skeletal:GTEx/v7/Artery_Tibial:GTEx/v7/Heart_Left_Ventricle	NA	Yes	Mesenchymal_Stem_Cell:Mesendoderm:hESC	1.339e-14	rs2451466;rs6584635;rs10786831;rs1565418;rs2491373:rs6584635:rs6584635;rs10786831:rs2451468:rs2491373;rs2451466:rs6584635;rs1565418:rs6584635;rs2491373;rs1565418:rs1565418:rs10786831:rs2451466:rs10786831;rs2451466:rs2491373;rs10786831:rs1565418;rs2451468	69
ENSG00000148841	ITPRIP	10	106071894	106098162	-1	protein_coding	85450	ITPRIP	1.35269e-05	0.357391	0	0	30	3.0963e-06	0.00607409	BRAINEAC/TCTX:GTEx/v8/Artery_Aorta	NA	No	NA	1.199e-08	rs2451468;rs1565418;rs6584635;rs10786831	69
ENSG00000120051	CCDC147	10	106113522	106214848	1	protein_coding	159686	CCDC147	3.42062e-18	-0.580409	0	0	1	NA	0.049	CMC_SVA_cis	NA	No	NA	0.0008055	rs1565418	69
ENSG00000156395	SORCS3	10	106400859	107024993	1	protein_coding	22986	SORCS3	0.325134	0.170375	532	21.3	326	1.8389e-42	0	eQTLcatalogue/HipSci_ge_iPSC:PsychENCODE_eQTLs:eQTLGen_cis_eQTLs:BIOSQTL/BIOS_eQTL_geneLevel:CMC_SVA_cis:GTEx/v8/Adipose_Subcutaneous:GTEx/v8/Adrenal_Gland:GTEx/v8/Nerve_Tibial:GTEx/v8/Pituitary:GTEx/v7/Adrenal_Gland:GTEx/v7/Nerve_Tibial:GTEx/v7/Pituitary:GTEx/v6/Adipose_Subcutaneous:GTEx/v6/Adrenal_Gland	NA	Yes	Promoter_anchored_loops:Adult_Cortex:Mesendoderm:Trophoblast-like_Cell:hESC	1.339e-14	rs2451466;rs1565418;rs10786831;rs2451468;rs2491373;rs6584635;rs1565418:rs10786831:rs10786831;rs2451466:rs2491373;rs2451466:rs6584635;rs10786831:rs6584635:rs2451468:rs2491373:rs2451466:rs6584635;rs1565418:rs2491373;rs10786831:rs1565418;rs2451468:rs6584635	69
ENSG00000151640	DPYSL4	10	134000404	134019280	1	protein_coding	10570	DPYSL4	5.85788e-06	NA	0	0	1	3.0296e-06	0.0217314	eQTLGen_trans_eQTLs	NA	No	NA	0.03871	rs13054099	109
ENSG00000132274	TRIM22	11	5710919	5758319	1	protein_coding	10346	TRIM22	3.15622e-12	1.62647	0	0	4	7.8128e-13	0	eQTLGen_trans_eQTLs	NA	No	NA	1.527e-07	rs13054099;rs5751069	109
ENSG00000183313	OR52L1	11	6007122	6008215	-1	protein_coding	338751	OR52L1	0.00634036	0.475896	0	0	5	0.0003039	0.0245081	TIGER/Nom_Alonso_Pancreatic_islets	NA	Yes	IMR90:Mesenchymal_Stem_Cell:Mesendoderm:Trophoblast-like_Cell	2.512e-08	rs7937911	70
ENSG00000110169	HPX	11	6452279	6463847	-1	protein_coding	3263	HPX	0.00412145	-0.0702041	0	0	1	2.9846e-06	0.014923	eQTLcatalogue/Nedelec_2016_ge_macrophage_Listeria	NA	Yes	Liver:GM12878:IMR90:Mesenchymal_Stem_Cell:Mesendoderm:Trophoblast-like_Cell	2.512e-08	rs7937911	70
ENSG00000110171	TRIM3	11	6469843	6495689	-1	protein_coding	10612	TRIM3	0.952561	0.387111	0	0	6	9.18709e-06	0.037	TIGER/Nom_Alonso_Pancreatic_islets:DICE/NK	NA	Yes	Left_Ventricle:Liver:Spleen:GM12878:IMR90:Mesenchymal_Stem_Cell:Mesendoderm:Trophoblast-like_Cell	2.512e-08	rs7937911	70
ENSG00000179532	DNHD1	11	6518490	6614988	1	protein_coding	144132	DNHD1	1.33458e-18	-0.251426	0	0	9	5.72769e-06	0.000336544	BIOSQTL/BIOS_eQTL_geneLevel:GTEx/v8/Pancreas	NA	Yes	Left_Ventricle:Liver:Spleen:GM12878:IMR90:Mesenchymal_Stem_Cell:Mesendoderm:Trophoblast-like_Cell	2.512e-08	rs7937911	70
ENSG00000132275	RRP8	11	6616305	6624850	-1	protein_coding	23378	RRP8	6.40183e-06	0.116704	0	0	3	3.3137e-08	0.000139762	eQTLGen_cis_eQTLs	NA	Yes	GM12878:IMR90:Mesenchymal_Stem_Cell	2.512e-08	rs7937911	70
ENSG00000166333	ILK	11	6624961	6632102	1	protein_coding	3611	ILK	0.042196	-0.668633	0	0	54	3.28699e-10	0	TIGER/Nom_Alonso_Pancreatic_islets:eQTLGen_cis_eQTLs:BIOSQTL/BIOS_eQTL_geneLevel:GTEx/v8/Esophagus_Gastroesophageal_Junction:GTEx/v8/Cells_Cultured_fibroblasts:GTEx/v8/Thyroid:GTEx/v7/Esophagus_Gastroesophageal_Junction:GTEx/v7/Thyroid	NA	Yes	GM12878:IMR90:Mesenchymal_Stem_Cell	2.512e-08	rs7937911	70
ENSG00000166337	TAF10	11	6627526	6633898	-1	protein_coding	6881	TAF10	0.776131	-0.432845	0	0	10	3.28699e-10	0	BIOSQTL/BIOS_eQTL_geneLevel	NA	Yes	GM12878:IMR90:Mesenchymal_Stem_Cell	2.512e-08	rs7937911	70
ENSG00000166340	TPP1	11	6634000	6640692	-1	protein_coding	1200	TPP1	0.0257561	-0.0853409	0	0	35	2.3028e-12	0	eQTLGen_cis_eQTLs:GTEx/v7/Thyroid	NA	Yes	Left_Ventricle:GM12878:IMR90:Mesenchymal_Stem_Cell:Mesendoderm:hESC	2.512e-08	rs7937911	70
ENSG00000166341	DCHS1	11	6642556	6677085	-1	protein_coding	8642	DCHS1	0.999995	NA	0	0	104	3.699e-103	0	eQTLcatalogue/BrainSeq_ge_brain:eQTLcatalogue/Fairfax_2014_LPS2:eQTLcatalogue/Lepik_2017_ge_blood:PsychENCODE_eQTLs:eQTLGen_cis_eQTLs:BIOSQTL/BIOS_eQTL_geneLevel:GTEx/v8/Esophagus_Muscularis:GTEx/v8/Thyroid	NA	Yes	Left_Ventricle:GM12878:IMR90:Mesenchymal_Stem_Cell:Mesendoderm:hESC	2.512e-08	rs7937911	70
ENSG00000158042	MRPL17	11	6702013	6704632	-1	protein_coding	63875	MRPL17	0.464121	2.22687	0	0	33	1.0273e-12	0	eQTLGen_cis_eQTLs:GTEx/v8/Thyroid:GTEx/v7/Thyroid	NA	No	NA	2.512e-08	rs7937911	70
ENSG00000188124	OR2AG2	11	6789218	6790286	-1	protein_coding	338755	OR2AG2	0.216722	-0.167106	12	11.49	0	NA	NA	NA	NA	Yes	Left_Ventricle:Liver:GM12878:IMR90:Mesenchymal_Stem_Cell:Mesendoderm:Trophoblast-like_Cell:hESC	2.512e-08	rs7937911	70
ENSG00000170803	OR2AG1	11	6806248	6807245	1	protein_coding	144125	OR2AG1	8.87524e-06	0.527018	5	11.49	0	NA	NA	NA	NA	Yes	Mesendoderm:hESC	2.512e-08	rs7937911	70
ENSG00000184933	OR6A2	11	6815756	6817128	-1	protein_coding	8590	OR6A2	0.267852	0.0934302	6	5.811	0	NA	NA	NA	NA	Yes	Mesendoderm:hESC	2.512e-08	rs7937911	70
ENSG00000166363	OR10A5	11	6866883	6867936	1	protein_coding	144124	OR10A5	0.00842213	1.13955	20	10.27	0	NA	NA	NA	NA	Yes	Mesendoderm:hESC	0.000179	rs7937911	70
ENSG00000170790	OR10A2	11	6890924	6891976	1	protein_coding	341276	OR10A2	0.000920372	0.692163	32	23.6	0	NA	NA	NA	NA	Yes	Mesendoderm:hESC	2.512e-08	rs7937911	70
ENSG00000170782	OR10A4	11	6897856	6898850	1	protein_coding	283297	OR10A4	2.78491e-05	0.0936536	18	23.6	0	NA	NA	NA	NA	Yes	Mesendoderm:hESC	2.512e-08	rs7937911	70
ENSG00000149054	ZNF215	11	6947635	7005863	1	protein_coding	7762	ZNF215	4.25306e-13	0.0601295	0	0	14	1.5018e-06	1.1777e-39	eQTLGen_cis_eQTLs:BIOSQTL/BIOS_eQTL_geneLevel:GTEx/v8/Adipose_Subcutaneous:GTEx/v8/Thyroid	NA	Yes	Mesendoderm	4.358e-07	rs7937911	70
ENSG00000158077	NLRP14	11	7041677	7092539	1	protein_coding	338323	NLRP14	9.14865e-23	-0.0831148	0	0	2	6.07603e-06	0.049	DICE/T_CD8_naive	NA	Yes	GM12878:IMR90:Mesenchymal_Stem_Cell:Mesendoderm:Neural_Progenitor_Cell:Trophoblast-like_Cell:hESC	2.512e-08	rs7937911	70
ENSG00000170748	RBMXL2	11	7110165	7112379	1	protein_coding	27288	RBMXL2	0.677817	0.465376	0	0	2	0.000458247	0.0307599	PsychENCODE_eQTLs	NA	Yes	IMR90:Mesendoderm:hESC	2.512e-08	rs7937911	70
ENSG00000166394	CYB5R2	11	7686331	7698453	-1	protein_coding	51700	CYB5R2	2.70695e-05	0.696502	0	0	5	0.000132324	0.0107386	PsychENCODE_eQTLs	NA	Yes	Promoter_anchored_loops:GM12878:IMR90:Mesenchymal_Stem_Cell:Mesendoderm:hESC	2.512e-08	rs7937911	70
ENSG00000176697	BDNF	11	27676440	27743605	-1	protein_coding	627	BDNF	0.946719	0.108206	0	0	1	0.000359081	1.10701e-06	GTEx/v8/Cells_Cultured_fibroblasts	NA	Yes	Aorta:Left_Ventricle:Liver:Pancreas:Right_Ventricle:GM12878:IMR90:Mesenchymal_Stem_Cell:Mesendoderm:Neural_Progenitor_Cell:Trophoblast-like_Cell:hESC	2.846e-08	rs7941641	71
ENSG00000121621	KIF18A	11	28042167	28129855	-1	protein_coding	81930	KIF18A	0.149441	-0.472005	0	0	1	0.000159179	0.000833801	GTEx/v8/Thyroid	NA	Yes	IMR90:Mesenchymal_Stem_Cell:Mesendoderm:Trophoblast-like_Cell:hESC	2.846e-08	rs7941641	71
ENSG00000169519	METTL15	11	28129795	28355054	1	protein_coding	196074	METTL15	0.000155431	-1.29305	0	0	35	1.88743e-09	3.13392e-19	eQTLcatalogue/BLUEPRINT_ge_monocyte:eQTLcatalogue/BLUEPRINT_ge_neutrophil:eQTLcatalogue/Fairfax_2014_naive:eQTLcatalogue/TwinsUK_ge_fat:CMC_SVA_cis:GTEx/v8/Artery_Tibial:GTEx/v8/Breast_Mammary_Tissue:GTEx/v8/Esophagus_Gastroesophageal_Junction:GTEx/v8/Esophagus_Mucosa:GTEx/v8/Esophagus_Muscularis:GTEx/v8/Nerve_Tibial:GTEx/v8/Cells_Cultured_fibroblasts:GTEx/v8/Skin_Not_Sun_Exposed_Suprapubic:GTEx/…	NA	Yes	IMR90:Mesenchymal_Stem_Cell:Mesendoderm:Trophoblast-like_Cell:hESC	2.846e-08	rs7941641	71
ENSG00000152219	ARL14EP	11	30344598	30359774	1	protein_coding	120534	ARL14EP	0.151697	-0.308298	0	0	5	8.42918e-05	0.0168549	TIGER/Nom_Alonso_Pancreatic_islets:GTEx/v8/Muscle_Skeletal	NA	Yes	Aorta:Left_Ventricle:Liver:Right_Ventricle:GM12878:IMR90:Mesenchymal_Stem_Cell:Mesendoderm:Neural_Progenitor_Cell:Trophoblast-like_Cell:hESC	2.437e-10	rs4067985;rs4067985:rs80067584;rs115682303:rs80067584:rs115682303:rs60171845:rs7941641	71:72:73:74
ENSG00000066382	MPPED2	11	30406040	30608419	-1	protein_coding	744	MPPED2	0.970565	0.0216018	0	0	86	6.04761e-21	2.75178e-16	GTEx/v8/Artery_Aorta:GTEx/v8/Muscle_Skeletal:GTEx/v8/Nerve_Tibial:GTEx/v8/Testis:GTEx/v7/Artery_Aorta:GTEx/v7/Muscle_Skeletal:GTEx/v7/Testis:GTEx/v6/Muscle_Skeletal:GTEx/v6/Testis	NA	Yes	Left_Ventricle:IMR90:Mesenchymal_Stem_Cell:Mesendoderm:Neural_Progenitor_Cell:Trophoblast-like_Cell:hESC	4.51e-10	rs4067985;rs4067985:rs60171845	72:73
ENSG00000170959	DCDC1	11	30851916	31391357	-1	protein_coding	100506627	DCDC1	9.13495e-05	-0.825531	95	14.41	70	5.34217e-15	2.07062e-60	EyeGEx:BIOSQTL/BIOS_eQTL_geneLevel:GTEx/v8/Nerve_Tibial:GTEx/v8/Testis:GTEx/v8/Thyroid:GTEx/v7/Testis	NA	Yes	Fetal_Cortex:IMR90:Mesenchymal_Stem_Cell:Mesendoderm:Neural_Progenitor_Cell:Trophoblast-like_Cell:hESC	2.437e-10	rs4067985;rs60171845;rs60171845:rs4067985	72:73
ENSG00000170946	DNAJC24	11	31391387	31453396	1	protein_coding	120526	DNAJC24	7.24727e-07	-1.03812	0	0	49	5.4758e-08	1.94069e-14	eQTLcatalogue/Quach_2016_ge_monocyte_R848:PsychENCODE_eQTLs:GTEx/v8/Muscle_Skeletal:GTEx/v8/Testis:GTEx/v7/Muscle_Skeletal:GTEx/v7/Testis:GTEx/v6/Testis	NA	Yes	Fetal_Cortex:IMR90:Mesenchymal_Stem_Cell:Mesendoderm:Neural_Progenitor_Cell:Trophoblast-like_Cell:hESC	2.437e-10	rs4067985;rs60171845:rs4067985	72:73
ENSG00000148950	IMMP1L	11	31453948	31531192	-1	protein_coding	196294	IMMP1L	0.0207132	0.0151483	0	0	5	2.39576e-05	8.74084e-05	GTEx/v8/Breast_Mammary_Tissue:GTEx/v7/Breast_Mammary_Tissue	NA	Yes	Fetal_Cortex:Left_Ventricle:IMR90:Mesenchymal_Stem_Cell:Mesendoderm:Neural_Progenitor_Cell:Trophoblast-like_Cell:hESC	2.437e-10	rs4067985;rs60171845:rs115682303:rs80067584:rs80067584;rs115682303:rs4067985	72:73:74
ENSG00000109911	ELP4	11	31531297	31805546	1	protein_coding	26610	ELP4	0.0125583	-0.412136	1	10.96	3	6.1863e-07	6.98132e-16	GTEx/v8/Adipose_Subcutaneous:GTEx/v8/Adipose_Visceral_Omentum	NA	Yes	Fetal_Cortex:Left_Ventricle:IMR90:Mesenchymal_Stem_Cell:Mesendoderm:Neural_Progenitor_Cell:Trophoblast-like_Cell:hESC	2.437e-10	rs60171845;rs4067985;rs60171845:rs115682303:rs80067584:rs80067584;rs115682303:rs4067985	72:73:74
ENSG00000007372	PAX6	11	31806340	31839509	-1	protein_coding	5080	PAX6	0.998808	-1.95552	16	17.31	9	2.8567e-08	4.01952e-05	BIOSQTL/BIOS_eQTL_geneLevel	NA	Yes	IMR90:Mesenchymal_Stem_Cell:Mesendoderm:Neural_Progenitor_Cell:Trophoblast-like_Cell:hESC	2.437e-10	rs60171845;rs60171845:rs80067584;rs115682303:rs80067584:rs115682303:rs4067985	72:73:74
ENSG00000049449	RCN1	11	31833939	32127301	1	protein_coding	440034	RCN1	0.0163386	-0.0886329	14	17.31	0	NA	NA	NA	NA	Yes	IMR90:Mesenchymal_Stem_Cell:Mesendoderm:Neural_Progenitor_Cell:Trophoblast-like_Cell:hESC	2.437e-10	rs60171845;rs60171845:rs80067584;rs115682303:rs80067584:rs115682303:rs4067985	72:73:74
ENSG00000149100	EIF3M	11	32605344	32627808	1	protein_coding	10480	EIF3M	0.981661	0.0967695	42	16.31	161	4.3411e-39	0	eQTLGen_cis_eQTLs:BIOSQTL/BIOS_eQTL_geneLevel:GTEx/v8/Adipose_Subcutaneous:GTEx/v8/Adipose_Visceral_Omentum:GTEx/v8/Artery_Aorta:GTEx/v8/Artery_Tibial:GTEx/v8/Breast_Mammary_Tissue:GTEx/v8/Colon_Transverse:GTEx/v8/Esophagus_Mucosa:GTEx/v8/Nerve_Tibial:GTEx/v8/Pancreas:GTEx/v8/Skin_Not_Sun_Exposed_Suprapubic:GTEx/v8/Skin_Sun_Exposed_Lower_leg:GTEx/v8/Thyroid:GTEx/v7/Adipose_Subcutaneous:GTEx/v7/Ad…	NA	Yes	GM12878:IMR90:Mesenchymal_Stem_Cell:Mesendoderm:Trophoblast-like_Cell:hESC	2.437e-10	rs115682303;rs80067584;rs115682303:rs80067584:rs80067584;rs115682303:rs60171845	73:74
ENSG00000186714	CCDC73	11	32623792	32816204	-1	protein_coding	493860	CCDC73	1.1903e-13	-0.239822	104	16.81	73	3.73875e-07	0.000269222	BIOSQTL/BIOS_eQTL_geneLevel	NA	Yes	GM12878:Mesenchymal_Stem_Cell:Mesendoderm:Trophoblast-like_Cell:hESC	8.566e-09	rs80067584;rs115682303;rs115682303:rs80067584:rs115682303:rs4067985	72:74
ENSG00000135378	PRRG4	11	32851489	32879669	1	protein_coding	79056	PRRG4	0.181402	-0.656974	63	16.49	164	3.54701e-08	3.19194e-05	TIGER/Nom_Alonso_Pancreatic_islets:eQTLcatalogue/Fairfax_2014_IFN24:PsychENCODE_eQTLs:GTEx/v8/Ovary:GTEx/v8/Skin_Sun_Exposed_Lower_leg:GTEx/v8/Stomach:GTEx/v7/Stomach	NA	Yes	hESC	8.566e-09	rs115682303;rs80067584;rs115682303:rs80067584:rs80067584	74
ENSG00000060749	QSER1	11	32914724	33014862	1	protein_coding	79832	QSER1	0.999936	-1.00992	7	31	56	1.1249e-16	0	eQTLGen_cis_eQTLs:GTEx/v8/Whole_Blood:GTEx/v7/Whole_Blood	NA	Yes	Fetal_Cortex:IMR90:Mesendoderm:hESC	1.025e-08	rs115682303;rs80067584;rs60171845:rs80067584;rs115682303:rs80067584:rs115682303	73:74
ENSG00000121690	DEPDC7	11	33037410	33055128	1	protein_coding	91614	DEPDC7	1.25057e-05	0.0693093	0	0	33	0.000322479	0.0229564	PsychENCODE_eQTLs	NA	No	NA	2.001e-08	rs115682303;rs80067584	74
ENSG00000176148	TCP11L1	11	33060963	33127489	1	protein_coding	55346	TCP11L1	0.088047	-1.15366	0	0	26	2.74275e-06	0.00206437	BIOSQTL/BIOS_eQTL_geneLevel	NA	Yes	Liver:GM12878:IMR90:Mesenchymal_Stem_Cell:Mesendoderm:Trophoblast-like_Cell:hESC	8.566e-09	rs80067584;rs115682303;rs115682303:rs80067584:rs80067584	74
ENSG00000086205	FOLH1	11	49168187	49230222	-1	protein_coding	219595	FOLH1	0.253397	-0.0941583	0	0	2	0.00393579	0.0408454	BRAINEAC/PUTM	NA	No	NA	1.593e-10	rs4753209;rs11018544	77
ENSG00000156738	MS4A1	11	60223225	60238233	1	protein_coding	931	MS4A1	0.0153882	0.269177	0	0	1	2.1728e-10	0	eQTLGen_trans_eQTLs	NA	No	NA	1.391e-05	rs9074	107
ENSG00000110108	TMEM109	11	60681346	60690915	1	protein_coding	79073	TMEM109	0.0518905	-0.925978	0	0	1	1.25253e-06	0.049	DICE/T_CD4_TH1	NA	Yes	Fetal_Cortex	0.0003209	rs198457	75
ENSG00000167987	VPS37C	11	60897728	60929089	-1	protein_coding	55048	VPS37C	0.197171	-0.999412	0	0	1	1.3078e-05	0.0365419	eQTLGen_cis_eQTLs	NA	No	NA	0.0001377	rs198457	75
ENSG00000229183	PGA4	11	60989688	61018929	1	protein_coding	643847	PGA4	NA	-0.4879	0	0	1	6.49104e-05	0.0343421	EyeGEx	NA	No	NA	2.399e-05	rs198457	75
ENSG00000149532	CPSF7	11	61170121	61197503	-1	protein_coding	79869	CPSF7	0.99133	-1.55329	0	0	3	8.09808e-08	1.43218e-29	BIOSQTL/BIOS_eQTL_geneLevel:GTEx/v8/Esophagus_Mucosa:GTEx/v8/Nerve_Tibial:GTEx/v8/Thyroid:GTEx/v7/Pituitary	NA	Yes	Adult_Cortex:Fetal_Cortex	2.399e-05	rs198457	75
ENSG00000011347	SYT7	11	61282785	61348620	-1	protein_coding	9066	SYT7	0.904579	NA	3	8.811	0	NA	NA	NA	NA	Yes	Adult_Cortex:Fetal_Cortex:IMR90:Mesenchymal_Stem_Cell:Mesendoderm	1.87e-08	rs198457	75
ENSG00000134780	DAGLA	11	61447905	61514473	1	protein_coding	747	DAGLA	0.953148	-0.966158	13	15.11	30	2.2461e-50	0	eQTLcatalogue/BLUEPRINT_ge_monocyte:eQTLcatalogue/Fairfax_2014_naive:eQTLcatalogue/Lepik_2017_ge_blood:PsychENCODE_eQTLs:eQTLGen_cis_eQTLs:BIOSQTL/BIOS_eQTL_geneLevel:GTEx/v8/Whole_Blood:GTEx/v8/Nerve_Tibial:GTEx/v8/Pancreas:GTEx/v8/Testis:GTEx/v7/Cells_Transformed_fibroblasts:GTEx/v7/Testis	NA	Yes	Promoter_anchored_loops:Adult_Cortex:Fetal_Cortex:Spleen:IMR90:Mesenchymal_Stem_Cell	1.87e-08	rs198457	75
ENSG00000124920	MYRF	11	61520114	61555990	1	protein_coding	745	MYRF	0.999848	-1.65959	10	19.93	34	2.17934e-77	0	eQTLcatalogue/GEUVADIS_ge_LCL:eQTLcatalogue/Lepik_2017_ge_blood:eQTLcatalogue/TwinsUK_ge_LCL:DICE/T_CD4_TH1:eQTLGen_cis_eQTLs:BIOSQTL/BIOS_eQTL_geneLevel:GTEx/v8/Adipose_Subcutaneous:GTEx/v8/Whole_Blood:GTEx/v8/Artery_Tibial:GTEx/v8/Breast_Mammary_Tissue:GTEx/v8/Esophagus_Mucosa:GTEx/v8/Liver:GTEx/v8/Cells_Cultured_fibroblasts:GTEx/v8/Spleen:GTEx/v8/Testis:GTEx/v8/Thyroid:GTEx/v7/Whole_Blood:GTEx…	NA	Yes	Promoter_anchored_loops:Spleen:IMR90	1.87e-08	rs198457	75
ENSG00000134825	TMEM258	11	61535973	61560274	-1	protein_coding	746	TMEM258	0.000864646	0.122739	7	19.93	15	9.7358e-48	0	eQTLGen_cis_eQTLs:BIOSQTL/BIOS_eQTL_geneLevel:CMC_SVA_cis:GTEx/v8/Testis	NA	Yes	Promoter_anchored_loops:Adult_Cortex:Fetal_Cortex:IMR90	1.87e-08	rs198457	75
ENSG00000168496	FEN1	11	61560109	61564716	1	protein_coding	2237	FEN1	3.47774e-05	-0.45994	0	0	5	1.60943e-09	6.11098e-06	BIOSQTL/BIOS_eQTL_geneLevel	NA	Yes	Promoter_anchored_loops:Adult_Cortex:Fetal_Cortex:IMR90	4.841e-07	rs198457	75
ENSG00000134824	FADS2	11	61560452	61634826	1	protein_coding	9415	FADS2	0.990052	-0.476246	0	0	25	4.1659e-155	0	eQTLcatalogue/Lepik_2017_ge_blood:eQTLcatalogue/TwinsUK_ge_LCL:DICE/T_CD4_TFH:DICE/T_CD4_TH1:DICE/T_CD4_TH17:eQTLGen_cis_eQTLs:BIOSQTL/BIOS_eQTL_geneLevel:GTEx/v8/Whole_Blood:GTEx/v8/Artery_Aorta:GTEx/v8/Colon_Transverse:GTEx/v8/Esophagus_Muscularis:GTEx/v8/Lung:GTEx/v8/Nerve_Tibial:GTEx/v8/Pituitary:GTEx/v8/Cells_Cultured_fibroblasts:GTEx/v8/Spleen:GTEx/v8/Thyroid:GTEx/v7/Whole_Blood:GTEx/v7/Art…	NA	Yes	Adult_Cortex:IMR90	1.87e-08	rs198457	75
ENSG00000149485	FADS1	11	61567099	61596790	-1	protein_coding	100302263	FADS1	0.383801	-0.763753	0	0	20	2.9949e-55	0	EyeGEx:eQTLcatalogue/BLUEPRINT_ge_T-cell:eQTLcatalogue/CEDAR_T-cell_CD8:PsychENCODE_eQTLs:DICE/T_CD4_naive:DICE/T_CD4_naive_activated:DICE/T_CD4_TFH:DICE/T_CD4_TH1:DICE/T_CD4_TH17:DICE/T_CD4_TH1_17:DICE/T_CD4_TH2:DICE/T_CD4_memory_TREG:eQTLGen_cis_eQTLs:BIOSQTL/BIOS_eQTL_geneLevel:CMC_SVA_cis:CMC_NoSVA_cis:GTEx/v8/Artery_Tibial:GTEx/v8/Brain_Cerebellar_Hemisphere:GTEx/v8/Brain_Cerebellum:GTEx/v8/…	NA	Yes	IMR90	1.87e-08	rs198457	75
ENSG00000221968	FADS3	11	61640991	61659523	-1	protein_coding	3995	FADS3	0.0488722	NA	0	0	3	4.07721e-06	0.00587995	BIOSQTL/BIOS_eQTL_geneLevel:GTEx/v8/Skin_Not_Sun_Exposed_Suprapubic:GTEx/v6/Esophagus_Gastroesophageal_Junction	NA	Yes	EP_links_oneway:Fetal_Cortex:IMR90	2.399e-05	rs198457	75
ENSG00000167994	RAB3IL1	11	61664773	61687741	-1	protein_coding	5866	RAB3IL1	0.000894541	-0.364568	0	0	9	5.6122e-22	0	eQTLcatalogue/Fairfax_2014_IFN24:eQTLcatalogue/Fairfax_2014_naive:eQTLGen_cis_eQTLs:BIOSQTL/BIOS_eQTL_geneLevel:CMC_SVA_cis:GTEx/v8/Whole_Blood:GTEx/v8/Lung:GTEx/v7/Whole_Blood:GTEx/v6/Whole_Blood	NA	Yes	Promoter_anchored_loops	1.87e-08	rs198457	75
ENSG00000167995	BEST1	11	61717293	61732987	1	protein_coding	7439	BEST1	4.88562e-08	0.261397	1	0.386	13	3.3786e-111	0	EyeGEx:eQTLcatalogue/Lepik_2017_ge_blood:PsychENCODE_eQTLs:eQTLGen_cis_eQTLs:BIOSQTL/BIOS_eQTL_geneLevel	NA	No	NA	1.87e-08	rs198457	75
ENSG00000167996	FTH1	11	61727190	61735132	-1	protein_coding	2495	FTH1	0.918437	NA	0	0	1	1.1026e-05	0.030963	eQTLGen_cis_eQTLs	NA	Yes	Promoter_anchored_loops:Spleen:IMR90	NA	rs198457	75
ENSG00000269089	AP003733.1	11	61735453	61736755	1	protein_coding	NA	NA	NA	NA	0	0	1	2.52769e-05	0.0290013	GTEx/v7/Thyroid	NA	Yes	Promoter_anchored_loops:Spleen:IMR90	2.962e-05	rs198457	75
ENSG00000149503	INCENP	11	61891445	61920635	1	protein_coding	3619	INCENP	0.996087	0.518653	0	0	1	1.1519e-09	0	eQTLGen_cis_eQTLs:BloodeQTL	NA	Yes	Promoter_anchored_loops	2.215e-06	rs198457	75
ENSG00000124939	SCGB2A1	11	61976140	61981408	1	protein_coding	4246	SCGB2A1	0.0564013	-0.285395	0	0	2	0.000168011	3.13019e-47	GTEx/v8/Skin_Not_Sun_Exposed_Suprapubic:GTEx/v8/Skin_Sun_Exposed_Lower_leg	NA	Yes	IMR90:Mesenchymal_Stem_Cell:Mesendoderm:Trophoblast-like_Cell	1.87e-08	rs198457	75
ENSG00000197745	SCGB1D4	11	62063754	62066536	-1	protein_coding	404552	SCGB1D4	0.00290219	-0.0741114	0	0	1	7.73001e-06	0.0386501	eQTLcatalogue/CEDAR_neutrophil_CD15	NA	Yes	Adult_Cortex:Mesenchymal_Stem_Cell	0.0003209	rs198457	75
ENSG00000124942	AHNAK	11	62201016	62323707	-1	protein_coding	79026	AHNAK	0.344567	-0.479742	0	0	2	2.83739e-06	0.014187	eQTLcatalogue/TwinsUK_ge_blood	NA	No	NA	2.841e-07	rs198457	75
ENSG00000149499	EML3	11	62369690	62380237	-1	protein_coding	256364	EML3	0.394341	NA	0	0	1	1.28487e-05	0.049	DICE/T_CD4_TFH	NA	No	NA	2.841e-07	rs198457	75
ENSG00000149541	B3GAT3	11	62382768	62389647	-1	protein_coding	26229	B3GAT3	0.000286975	-0.288759	0	0	2	3.26046e-06	0.049	DICE/T_CD4_TFH:CMC_SVA_cis	NA	No	NA	2.841e-07	rs198457	75
ENSG00000214753	HNRNPUL2	11	62480102	62494821	-1	protein_coding	221092	HNRNPUL2	0.999925	-1.25219	0	0	1	0.000148705	0.0249188	GTEx/v8/Artery_Tibial	NA	No	NA	NA	rs198457	75
ENSG00000168040	FADD	11	70049269	70053496	1	protein_coding	8772	FADD	0.665953	-0.0112488	0	0	15	3.96812e-06	0.049	DICE/T_CD4_TH2	NA	No	NA	1.198e-08	rs7117514	76
ENSG00000131626	PPFIA1	11	70116806	70230509	1	protein_coding	8500	PPFIA1	1	-0.0137077	0	0	2	6.8484e-09	4.51496e-05	eQTLGen_cis_eQTLs	NA	No	NA	0.008988	rs7117514	76
ENSG00000085733	CTTN	11	70244510	70282690	1	protein_coding	2017	CTTN	0.215777	NA	0	0	10	1.89577e-05	1.47563e-06	GTEx/v8/Esophagus_Muscularis	NA	No	NA	2.563e-07	rs7117514	76
ENSG00000162105	SHANK2	11	70313961	70963623	-1	protein_coding	22941	SHANK2	0.99992	NA	42	7.903	5	2.27421e-05	2.8939e-09	GTEx/v8/Adipose_Visceral_Omentum:GTEx/v7/Adipose_Visceral_Omentum	NA	Yes	IMR90	1.198e-08	rs7117514	76
ENSG00000137501	SYTL2	11	85405267	85522184	-1	protein_coding	54843	SYTL2	2.11827e-19	-0.466325	0	0	1	NA	0.009	CMC_SVA_trans	NA	Yes	Left_Ventricle:IMR90:Mesenchymal_Stem_Cell	6.365e-05	rs1833303;rs10160510:rs6483414	77:104
ENSG00000123892	RAB38	11	87846410	87908635	-1	protein_coding	23682	RAB38	0.00471762	0.74959	0	0	49	2.5628e-09	2.60298e-05	eQTLGen_cis_eQTLs	NA	Yes	Aorta:Left_Ventricle:Liver:Ovary:GM12878:IMR90:Mesenchymal_Stem_Cell:Mesendoderm:Neural_Progenitor_Cell:Trophoblast-like_Cell:hESC	7.338e-15	rs6483414;rs10160510;rs648702;rs11018544;rs4753209;rs10830219;rs10160510:rs6483414:rs648702:rs4753209;rs648702:rs4753209;rs11018544:rs648702;rs11018544:rs4753209;rs10830219:rs11018544:rs10160510;rs6483414:rs648702;rs10830219:rs4753209:rs4753209;rs10830219:rs10830219:rs4753209	77
ENSG00000109861	CTSC	11	88026760	88070955	-1	protein_coding	1075	CTSC	0.000816868	-0.0179911	0	0	287	6.9954e-272	0	EyeGEx:eQTLcatalogue/BLUEPRINT_ge_neutrophil:eQTLcatalogue/CEDAR_ileum:eQTLcatalogue/CEDAR_monocyte_CD14:eQTLcatalogue/CEDAR_neutrophil_CD15:eQTLcatalogue/Fairfax_2014_LPS24:eQTLcatalogue/Fairfax_2014_naive:eQTLcatalogue/Lepik_2017_ge_blood:eQTLcatalogue/TwinsUK_ge_blood:eQTLcatalogue/TwinsUK_ge_LCL:eQTLGen_cis_eQTLs:BIOSQTL/BIOS_eQTL_geneLevel:GTEx/v8/Adipose_Subcutaneous:GTEx/v8/Whole_Blood:GTE…	NA	Yes	Aorta:Left_Ventricle:GM12878:IMR90:Mesenchymal_Stem_Cell:Mesendoderm:Trophoblast-like_Cell:hESC	7.338e-15	rs10160510;rs11018544;rs10830219;rs6483414;rs648702;rs4753209;rs10160510:rs6483414	77
ENSG00000168959	GRM5	11	88237744	88799113	-1	protein_coding	2915	GRM5	0.985984	-0.290923	345	16.56	1	6.985e-05	0.0448199	GTEx/v7/Testis	NA	Yes	Promoter_anchored_loops:Mesendoderm:hESC	7.338e-15	rs10160510;rs6483414;rs11018544;rs648702;rs10830219;rs4753209;rs10830219:rs11018544:rs6483414:rs10160510	77
ENSG00000077498	TYR	11	88910620	89028927	1	protein_coding	7299	TYR	7.26381e-21	0.225785	99	29.4	0	NA	NA	NA	NA	Yes	Left_Ventricle:Liver:IMR90:Mesenchymal_Stem_Cell:Mesendoderm:Trophoblast-like_Cell:hESC	5.611e-12	rs4753209;rs10830219;rs11018544;rs10160510;rs10160510:rs6483414:rs11018544;rs10830219:rs4753209;rs11018544:rs4753209;rs10830219:rs10830219:rs11018544	77
ENSG00000086991	NOX4	11	89057524	89322779	-1	protein_coding	50507	NOX4	8.15748e-07	-0.0576464	14	11.51	3	1.01483e-05	0.0376584	CMC_SVA_cis:GTEx/v8/Brain_Amygdala:GTEx/v8/Thyroid	NA	Yes	Aorta:Left_Ventricle:IMR90:Mesenchymal_Stem_Cell:Mesendoderm:Trophoblast-like_Cell:hESC	2.717e-14	rs11018544;rs10830219;rs10160510;rs10160510:rs6483414:rs11018544;rs10830219:rs4753209;rs11018544:rs4753209;rs10830219:rs10830219:rs11018544:rs4753209;rs10830219:rs10160510;rs6483414:rs648702:rs4753209;rs648702:rs648702;rs648702;rs10830219:rs648702;rs6483414:rs648702;rs10830219:rs4753209:rs4753209	77
ENSG00000168930	TRIM49	11	89530823	89541743	-1	protein_coding	57093	TRIM49	0.645523	-0.636835	0	0	3	2.62524e-06	0.0131262	eQTLcatalogue/CEDAR_transverse_colon	NA	Yes	Promoter_anchored_loops	5.349e-10	rs648702;rs4753209;rs11018544;rs10830219:rs11018544:rs10830219	77
ENSG00000223417	TRIM49D1	11	89644279	89654935	-1	protein_coding	101930245	TRIM49D1	NA	-0.43969	0	0	1	5.63652e-07	0.00281826	eQTLcatalogue/Fairfax_2014_LPS2	NA	No	NA	NA	rs11018544	77
ENSG00000077616	NAALAD2	11	89864683	89926062	1	protein_coding	10003	NAALAD2	7.0245e-15	-0.05019	0	0	2	3.11354e-05	6.04762e-18	PsychENCODE_eQTLs:GTEx/v8/Esophagus_Gastroesophageal_Junction	NA	Yes	Promoter_anchored_loops:Mesenchymal_Stem_Cell:Mesendoderm	1.103e-12	rs10160510;rs11018544:rs10830219:rs4753209;rs11018544:rs4753209;rs10830219:rs4753209;rs11018544;rs10830219:rs10160510:rs11018544;rs10830219	77
ENSG00000149972	CNTN5	11	98891683	100229616	1	protein_coding	53942	CNTN5	0.00135406	0.148887	125	17.69	77	3.24357e-06	0.00869853	GTEx/v8/Pituitary	NA	Yes	Left_Ventricle:IMR90:Mesenchymal_Stem_Cell:Mesendoderm:Trophoblast-like_Cell:hESC	1.622e-08	rs597187	78
ENSG00000149292	TTC12	11	113185251	113254266	1	protein_coding	54970	TTC12	1.44727e-07	-0.271528	33	9.198	112	0	0	TIGER/Nom_Alonso_Pancreatic_islets:Nom_InsPIRE_Islets_Gene_eQTLs_Nominal_Pvalues:EyeGEx:eQTLcatalogue/Alasoo_2018_ge_macrophage_IFNg:eQTLcatalogue/Alasoo_2018_ge_macrophage_naive:eQTLcatalogue/BLUEPRINT_ge_monocyte:eQTLcatalogue/BLUEPRINT_ge_T-cell:eQTLcatalogue/BrainSeq_ge_brain:eQTLcatalogue/CEDAR_B-cell_CD19:eQTLcatalogue/CEDAR_monocyte_CD14:eQTLcatalogue/CEDAR_rectum:eQTLcatalogue/CEDAR_T-cel…	NA	Yes	Promoter_anchored_loops:Adult_Cortex:Fetal_Cortex:Aorta:Left_Ventricle:IMR90:Mesenchymal_Stem_Cell:Mesendoderm:Trophoblast-like_Cell:hESC	2.588e-16	rs1554929;rs11214601;rs4938023;rs10891564;rs17613838;rs17613838:rs4938023:rs10891564:rs4938023;rs1554929:rs4938023	79
ENSG00000170209	ANKK1	11	113258513	113271140	1	protein_coding	255239	ANKK1	2.51117e-08	-0.0175482	30	14.89	296	6.1505e-163	0	eQTLcatalogue/BLUEPRINT_ge_T-cell:eQTLcatalogue/CEDAR_T-cell_CD4:eQTLcatalogue/Kasela_2017_T-cell_CD4:eQTLcatalogue/Kasela_2017_T-cell_CD8:eQTLcatalogue/Lepik_2017_ge_blood:eQTLcatalogue/TwinsUK_ge_blood:PsychENCODE_eQTLs:DICE/B_cell_naive:DICE/T_CD4_naive:DICE/T_CD8_naive:DICE/Monocyte_classical:DICE/T_CD4_TFH:DICE/T_CD4_TH17:DICE/T_CD4_TH1_17:DICE/T_CD4_TH2:DICE/T_CD4_memory_TREG:DICE/T_CD4_nai…	NA	Yes	Spleen:IMR90:Mesenchymal_Stem_Cell:Mesendoderm:hESC	2.588e-16	rs1554929;rs11214601;rs4938023;rs10891564;rs17613838;rs11214601:rs1554929:rs1554929;rs11214601:rs4938023;rs1554929:rs4938023:rs4938023;rs10891564:rs17613838	79
ENSG00000149295	DRD2	11	113280318	113346413	-1	protein_coding	1813	DRD2	0.733264	NA	69	19.05	167	1.49601e-14	2.57643e-23	eQTLcatalogue/TwinsUK_ge_skin:DICE/T_CD4_memory_TREG:GTEx/v8/Adipose_Subcutaneous:GTEx/v8/Adipose_Visceral_Omentum:GTEx/v8/Artery_Aorta:GTEx/v8/Brain_Cerebellar_Hemisphere:GTEx/v8/Brain_Cerebellum:GTEx/v8/Brain_Cortex:GTEx/v8/Colon_Sigmoid:GTEx/v8/Colon_Transverse:GTEx/v8/Esophagus_Gastroesophageal_Junction:GTEx/v8/Esophagus_Muscularis:GTEx/v8/Muscle_Skeletal:GTEx/v8/Nerve_Tibial:GTEx/v8/Skin_Not…	NA	Yes	Promoter_anchored_loops:Spleen:Mesendoderm	2.588e-16	rs11214601;rs1554929;rs4938023;rs10891564;rs17613838;rs10891564:rs4938023;rs1554929:rs4938023:rs17613838:rs11214601:rs1554929:rs1554929;rs11214601:rs4938023	79
ENSG00000166682	TMPRSS5	11	113558272	113577095	-1	protein_coding	80975	TMPRSS5	2.57786e-08	0.183794	46	14.26	319	6.51832e-15	7.16728e-27	eQTLcatalogue/BrainSeq_ge_brain:PsychENCODE_eQTLs:eQTLGen_cis_eQTLs:BIOSQTL/BIOS_eQTL_geneLevel:xQTLServer_eQTLs:CMC_SVA_cis:CMC_NoSVA_cis:BRAINEAC/HIPP:BRAINEAC/MEDU:BRAINEAC/PUTM:BRAINEAC/SNIG:BRAINEAC/THAL:BRAINEAC/WHMT:GTEx/v8/Brain_Amygdala:GTEx/v8/Brain_Anterior_cingulate_cortex_BA24:GTEx/v8/Brain_Caudate_basal_ganglia:GTEx/v8/Brain_Cortex:GTEx/v8/Brain_Nucleus_accumbens_basal_ganglia:GTEx/…	NA	Yes	EP_correlation_cell_type_oneway:Fetal_Cortex:Aorta:Left_Ventricle:Pancreas:IMR90:Mesenchymal_Stem_Cell:Mesendoderm:Neural_Progenitor_Cell:Trophoblast-like_Cell:hESC	2.588e-16	rs17613838;rs4938023;rs1554929;rs10891564:rs17613838:rs1554929:rs4938023;rs1554929:rs11214601:rs4938023:rs1554929;rs11214601:rs4938023;rs10891564	79
ENSG00000086827	ZW10	11	113603909	113644533	-1	protein_coding	9183	ZW10	0.0472629	-0.861239	71	13.54	186	3.8522e-06	0.0111326	eQTLGen_cis_eQTLs:GTEx/v8/Brain_Cerebellum	NA	No	NA	1.392e-08	rs17613838	79
ENSG00000228607	CLDN25	11	113650469	113651222	1	protein_coding	644672	CLDN25	2.36412e-09	-0.159951	47	13.19	14	5.25243e-06	0.00762699	BRAINEAC/HIPP	NA	No	NA	1.31e-09	rs17613838;rs11214601	79
ENSG00000048028	USP28	11	113668596	113746292	-1	protein_coding	57646	USP28	0.0316575	0.869552	60	17.14	345	8.1026e-20	0	EyeGEx:eQTLcatalogue/BLUEPRINT_ge_neutrophil:eQTLcatalogue/GEUVADIS_ge_LCL:eQTLcatalogue/Quach_2016_ge_monocyte_IAV:eQTLcatalogue/Quach_2016_ge_monocyte_naive:eQTLcatalogue/TwinsUK_ge_LCL:eQTLGen_cis_eQTLs:BIOSQTL/BIOS_eQTL_geneLevel:GTEx/v8/Cells_EBV-transformed_lymphocytes:GTEx/v8/Whole_Blood:GTEx/v8/Muscle_Skeletal:GTEx/v8/Cells_Cultured_fibroblasts:GTEx/v7/Muscle_Skeletal:GTEx/v6/Cells_EBV-tr…	NA	Yes	Promoter_anchored_loops:IMR90	1.392e-08	rs17613838;rs1554929:rs11214601	79
ENSG00000149305	HTR3B	11	113775399	113817287	1	protein_coding	9177	HTR3B	6.14953e-07	0.319178	22	6.17	195	2.83181e-10	6.45456e-08	PsychENCODE_eQTLs:BIOSQTL/BIOS_eQTL_geneLevel:GTEx/v7/Brain_Frontal_Cortex_BA9	NA	Yes	Promoter_anchored_loops	1.435e-08	rs17613838;rs1554929	79
ENSG00000166736	HTR3A	11	113845603	113861035	1	protein_coding	3359	HTR3A	1.02839e-09	-0.00512955	0	0	59	8.7815e-17	0	PsychENCODE_eQTLs:eQTLGen_cis_eQTLs:GTEx/v8/Skin_Sun_Exposed_Lower_leg	NA	Yes	Spleen	3.471e-06	rs17613838	79
ENSG00000109906	ZBTB16	11	113930315	114121398	1	protein_coding	7704	ZBTB16	0.980087	NA	0	0	1	0.000545094	0.0354714	PsychENCODE_eQTLs	NA	Yes	Adult_Cortex:Fetal_Cortex	2.532e-15	rs17613838;rs17613838:rs1554929:rs4938023;rs1554929:rs11214601:rs10891564:rs4938023	79
ENSG00000160683	CXCR5	11	118754475	118768508	1	protein_coding	643	CXCR5	0.160254	-0.86613	0	0	1	6.5248e-10	2.05128e-05	eQTLGen_trans_eQTLs	NA	No	NA	1.391e-05	rs9074	107
ENSG00000139116	KIF21A	12	39687030	39837192	-1	protein_coding	55605	KIF21A	6.18013e-05	NA	0	0	2	5.8217e-09	0.000136008	eQTLGen_trans_eQTLs	NA	No	NA	0.0007836	rs13054099;rs5751069	109
ENSG00000111602	TIMELESS	12	56810903	56843187	-1	protein_coding	8914	TIMELESS	1.03547e-25	-0.382076	0	0	3	1.1442e-07	0.00126276	eQTLGen_trans_eQTLs	NA	No	NA	1.527e-07	rs9074;rs13054099;rs5751069	107:109
ENSG00000076248	UNG	12	109535379	109548797	1	protein_coding	7374	UNG	0.0465812	-1.04807	0	0	2	5.4013e-13	0	eQTLGen_trans_eQTLs	NA	No	NA	0.0007836	rs13054099;rs5751069	109
ENSG00000122986	HVCN1	12	111065646	111142755	-1	protein_coding	84329	HVCN1	0.750491	-0.518136	0	0	1	1.7322e-07	0.00170006	eQTLGen_trans_eQTLs	NA	No	NA	1.391e-05	rs9074	107
ENSG00000089220	PEBP1	12	118573663	118583389	1	protein_coding	5037	PEBP1	0.148864	-0.129914	0	0	2	5.3544e-06	0.0348426	eQTLGen_trans_eQTLs	NA	No	NA	1.527e-07	rs13054099;rs5751069	109
ENSG00000135127	CCDC64	12	120427673	120532298	1	protein_coding	92558	CCDC64	0.549255	-0.157898	0	0	1	7.48147e-05	0.0130485	GTEx/v8/Cells_Cultured_fibroblasts	NA	No	NA	NA	rs35905305	81
ENSG00000111737	RAB35	12	120532899	120555306	-1	protein_coding	11021	RAB35	0.979782	-0.165066	0	0	1	6.04883e-05	0.0354139	EyeGEx	NA	No	NA	NA	rs35905305	81
ENSG00000089157	RPLP0	12	120634489	120639038	-1	protein_coding	6175	RPLP0	0.978692	-0.621045	0	0	2	1.0826e-06	0.00875682	eQTLGen_trans_eQTLs	NA	No	NA	0.0007836	rs13054099;rs5751069	109
ENSG00000089163	SIRT4	12	120740119	120751052	1	protein_coding	23409	SIRT4	1.80677e-07	-0.347425	0	0	1	1.62891e-05	1.52608e-05	GTEx/v7/Lung	NA	Yes	Adult_Cortex:Fetal_Cortex:IMR90	1.12e-09	rs35905305	81
ENSG00000111775	COX6A1	12	120875893	120878545	1	protein_coding	1337	COX6A1	0.0609576	0.1761	0	0	4	4.6776e-06	9.60063e-11	GTEx/v8/Brain_Cortex:GTEx/v8/Testis:GTEx/v7/Skin_Sun_Exposed_Lower_leg	NA	Yes	Promoter_anchored_loops:Adult_Cortex	1.12e-09	rs35905305	81
ENSG00000257218	GATC	12	120884241	120899389	1	protein_coding	283459	GATC	7.7902e-05	1.06418	0	0	57	4.9451e-13	0	eQTLcatalogue/BLUEPRINT_ge_monocyte:PsychENCODE_eQTLs:eQTLGen_cis_eQTLs:CMC_SVA_cis:CMC_NoSVA_cis:GTEx/v8/Adipose_Visceral_Omentum:GTEx/v8/Adrenal_Gland:GTEx/v8/Artery_Tibial:GTEx/v8/Brain_Caudate_basal_ganglia:GTEx/v8/Brain_Cortex:GTEx/v8/Brain_Frontal_Cortex_BA9:GTEx/v8/Brain_Hippocampus:GTEx/v8/Brain_Hypothalamus:GTEx/v8/Brain_Nucleus_accumbens_basal_ganglia:GTEx/v8/Brain_Putamen_basal_ganglia…	NA	Yes	Promoter_anchored_loops	9.281e-10	rs35905305	81
ENSG00000111786	SRSF9	12	120899471	120907596	-1	protein_coding	283459	SRSF9	0.819639	NA	0	0	9	3.14387e-05	0.0406079	EyeGEx:CMC_SVA_cis:GTEx/v8/Spleen	NA	Yes	Promoter_anchored_loops	2.275e-06	rs35905305	81
ENSG00000110871	COQ5	12	120941077	120972237	-1	protein_coding	84274	COQ5	7.95018e-05	0.0266279	0	0	84	2.2014e-38	0	eQTLcatalogue/Fairfax_2014_naive:PsychENCODE_eQTLs:eQTLGen_cis_eQTLs:BIOSQTL/BIOS_eQTL_geneLevel:GTEx/v8/Adipose_Subcutaneous:GTEx/v8/Artery_Aorta:GTEx/v8/Breast_Mammary_Tissue:GTEx/v8/Colon_Sigmoid:GTEx/v8/Colon_Transverse:GTEx/v8/Esophagus_Muscularis:GTEx/v8/Heart_Atrial_Appendage:GTEx/v8/Heart_Left_Ventricle:GTEx/v8/Muscle_Skeletal:GTEx/v8/Nerve_Tibial:GTEx/v8/Pancreas:GTEx/v8/Skin_Sun_Exposed…	NA	Yes	Left_Ventricle:Liver:IMR90:Mesenchymal_Stem_Cell:Mesendoderm:Trophoblast-like_Cell:hESC	9.281e-10	rs35905305	81
ENSG00000022840	RNF10	12	120971283	121015397	1	protein_coding	9921	RNF10	0.502963	0.0371152	0	0	63	2.8764e-24	0	eQTLGen_cis_eQTLs	NA	Yes	Left_Ventricle:Liver:IMR90:Mesenchymal_Stem_Cell:Mesendoderm:Trophoblast-like_Cell:hESC	9.281e-10	rs35905305	81
ENSG00000167272	POP5	12	121016567	121019201	-1	protein_coding	51367	POP5	1.28002e-05	-0.243977	0	0	27	3.4919e-10	0	TIGER/Nom_Alonso_Pancreatic_islets:eQTLcatalogue/CEDAR_T-cell_CD4:eQTLGen_cis_eQTLs:CMC_SVA_cis:GTEx/v8/Adipose_Visceral_Omentum:GTEx/v8/Brain_Cerebellum:GTEx/v8/Thyroid:GTEx/v7/Thyroid	NA	Yes	Promoter_anchored_loops:Adult_Cortex:Fetal_Cortex:Left_Ventricle:Spleen:GM12878:IMR90:Mesenchymal_Stem_Cell:Mesendoderm:Trophoblast-like_Cell:hESC	9.281e-10	rs35905305	81
ENSG00000157782	CABP1	12	121078355	121105127	1	protein_coding	9478	CABP1	0.994401	NA	0	0	20	1.44879e-37	0	eQTLGen_cis_eQTLs:BIOSQTL/BIOS_eQTL_geneLevel:GTEx/v8/Brain_Cerebellum:GTEx/v8/Skin_Not_Sun_Exposed_Suprapubic:GTEx/v8/Skin_Sun_Exposed_Lower_leg	NA	Yes	Promoter_anchored_loops	1.624e-06	rs35905305	81
ENSG00000110917	MLEC	12	121124672	121139667	1	protein_coding	9761	MLEC	0.470921	1.03337	1	0.044	109	1.6832e-114	0	EyeGEx:eQTLcatalogue/BLUEPRINT_ge_monocyte:eQTLcatalogue/BLUEPRINT_ge_neutrophil:eQTLcatalogue/CEDAR_neutrophil_CD15:eQTLcatalogue/Fairfax_2014_naive:eQTLcatalogue/Lepik_2017_ge_blood:eQTLcatalogue/TwinsUK_ge_fat:PsychENCODE_eQTLs:eQTLGen_cis_eQTLs:BIOSQTL/BIOS_eQTL_geneLevel:CMC_SVA_cis:GTEx/v8/Whole_Blood:GTEx/v8/Artery_Tibial:GTEx/v8/Esophagus_Muscularis:GTEx/v8/Nerve_Tibial:GTEx/v8/Skin_Not_S…	NA	Yes	Promoter_anchored_loops:Adult_Cortex:Fetal_Cortex:Left_Ventricle:Liver:GM12878:IMR90:Mesenchymal_Stem_Cell:Mesendoderm:Trophoblast-like_Cell:hESC	9.281e-10	rs35905305	81
ENSG00000175970	UNC119B	12	121148238	121161443	1	protein_coding	84747	UNC119B	0.677325	0.550413	2	1.501	115	6.3354e-121	0	eQTLcatalogue/BLUEPRINT_ge_monocyte:eQTLcatalogue/BLUEPRINT_ge_neutrophil:eQTLcatalogue/Fairfax_2014_LPS24:eQTLcatalogue/Lepik_2017_ge_blood:eQTLGen_cis_eQTLs:BIOSQTL/BIOS_eQTL_geneLevel:GTEx/v8/Adipose_Subcutaneous:GTEx/v8/Whole_Blood:GTEx/v8/Artery_Tibial:GTEx/v8/Brain_Anterior_cingulate_cortex_BA24:GTEx/v8/Brain_Hippocampus:GTEx/v8/Brain_Putamen_basal_ganglia:GTEx/v8/Brain_Substantia_nigra:GTE…	NA	Yes	Adult_Cortex:Left_Ventricle:Liver:GM12878:IMR90:Mesenchymal_Stem_Cell:Mesendoderm:Trophoblast-like_Cell:hESC	9.281e-10	rs35905305	81
ENSG00000122971	ACADS	12	121163538	121177811	1	protein_coding	35	ACADS	0.00016291	0.905088	7	25.9	106	0	0	EyeGEx:eQTLcatalogue/BLUEPRINT_ge_neutrophil:eQTLcatalogue/BrainSeq_ge_brain:PsychENCODE_eQTLs:eQTLGen_cis_eQTLs:BIOSQTL/BIOS_eQTL_geneLevel:xQTLServer_eQTLs:CMC_SVA_cis:GTEx/v8/Artery_Aorta:GTEx/v8/Artery_Tibial:GTEx/v8/Brain_Anterior_cingulate_cortex_BA24:GTEx/v8/Brain_Caudate_basal_ganglia:GTEx/v8/Brain_Cerebellar_Hemisphere:GTEx/v8/Brain_Cerebellum:GTEx/v8/Brain_Cortex:GTEx/v8/Brain_Hippocamp…	NA	Yes	Adult_Cortex	9.281e-10	rs35905305	81
ENSG00000157837	SPPL3	12	121200313	121342174	-1	protein_coding	121665	SPPL3	0.907786	0.151809	119	17.9	141	0	0	EyeGEx:eQTLcatalogue/Alasoo_2018_ge_macrophage_IFNg_Salmonella:eQTLcatalogue/BLUEPRINT_ge_monocyte:eQTLcatalogue/BLUEPRINT_ge_T-cell:eQTLcatalogue/GENCORD_ge_T-cell:eQTLcatalogue/Quach_2016_ge_monocyte_IAV:eQTLcatalogue/Quach_2016_ge_monocyte_LPS:eQTLcatalogue/Quach_2016_ge_monocyte_Pam3CSK4:eQTLcatalogue/Quach_2016_ge_monocyte_R848:eQTLcatalogue/TwinsUK_ge_fat:eQTLcatalogue/TwinsUK_ge_skin:Psych…	NA	Yes	Promoter_anchored_loops:Adult_Cortex:GM12878:IMR90:Mesenchymal_Stem_Cell	9.281e-10	rs35905305	81
ENSG00000272214	AC079602.1	12	121407641	121410095	-1	protein_coding	NA	NA	NA	NA	10	7.052	0	NA	NA	NA	NA	Yes	Promoter_anchored_loops:GM12878:IMR90:Mesenchymal_Stem_Cell	2.895e-09	rs35905305	81
ENSG00000135100	HNF1A	12	121416346	121440315	1	protein_coding	6927	HNF1A	0.969659	-0.628781	4	7.052	48	1.53339e-17	0	PsychENCODE_eQTLs:eQTLGen_cis_eQTLs:BIOSQTL/BIOS_eQTL_geneLevel:CMC_SVA_cis:CMC_NoSVA_cis:GTEx/v7/Brain_Cortex:GTEx/v7/Testis	NA	Yes	Promoter_anchored_loops:GM12878:IMR90:Mesenchymal_Stem_Cell	2.895e-09	rs35905305	81
ENSG00000157895	C12orf43	12	121440225	121454305	-1	protein_coding	64897	C12orf43	2.56006e-07	0.963741	1	0.333	127	3.3524e-143	0	TIGER/Nom_Alonso_Pancreatic_islets:eQTLcatalogue/CEDAR_monocyte_CD14:eQTLcatalogue/CEDAR_T-cell_CD4:eQTLcatalogue/CEDAR_T-cell_CD8:eQTLcatalogue/Fairfax_2012_B-cell_CD19:eQTLcatalogue/Fairfax_2014_IFN24:eQTLcatalogue/Fairfax_2014_LPS24:eQTLcatalogue/Fairfax_2014_LPS2:eQTLcatalogue/Fairfax_2014_naive:eQTLcatalogue/Lepik_2017_ge_blood:PsychENCODE_eQTLs:eQTLGen_cis_eQTLs:BIOSQTL/BIOS_eQTL_geneLevel:…	NA	Yes	Adult_Cortex:GM12878:IMR90:Mesenchymal_Stem_Cell:Mesendoderm:Trophoblast-like_Cell	9.281e-10	rs35905305	81
ENSG00000135114	OASL	12	121458095	121477045	-1	protein_coding	8638	OASL	5.07294e-12	0.332935	1	0.333	92	8.2764e-162	0	eQTLcatalogue/CEDAR_T-cell_CD8:eQTLcatalogue/Fairfax_2014_IFN24:eQTLcatalogue/Kasela_2017_T-cell_CD4:eQTLcatalogue/Kasela_2017_T-cell_CD8:eQTLcatalogue/Naranbhai_2015_neutrophil_CD16:eQTLGen_cis_eQTLs:BIOSQTL/BIOS_eQTL_geneLevel:GTEx/v8/Whole_Blood:GTEx/v7/Whole_Blood:GTEx/v6/Whole_Blood	NA	Yes	Adult_Cortex:GM12878:IMR90:Mesenchymal_Stem_Cell:Mesendoderm:Trophoblast-like_Cell	9.281e-10	rs35905305	81
ENSG00000089041	P2RX7	12	121570622	121623876	1	protein_coding	5027	P2RX7	3.7897e-06	0.326949	0	0	4	3.4617e-07	0.00110237	eQTLGen_cis_eQTLs	NA	Yes	Promoter_anchored_loops:Adult_Cortex:Spleen:IMR90:Mesenchymal_Stem_Cell:Mesendoderm:Trophoblast-like_Cell	1.12e-09	rs35905305	81
ENSG00000135124	P2RX4	12	121647660	121671909	1	protein_coding	5025	P2RX4	2.36801e-09	NA	0	0	66	3.7686e-65	0	eQTLcatalogue/TwinsUK_ge_skin:PsychENCODE_eQTLs:eQTLGen_cis_eQTLs:CMC_SVA_cis:GTEx/v8/Nerve_Tibial:GTEx/v7/Artery_Aorta	NA	Yes	Promoter_anchored_loops:Adult_Cortex:Fetal_Cortex:Spleen:GM12878:IMR90:Mesenchymal_Stem_Cell:Mesendoderm:Trophoblast-like_Cell:hESC	9.281e-10	rs35905305	81
ENSG00000110931	CAMKK2	12	121675497	121736111	-1	protein_coding	10645	CAMKK2	0.503476	0.336426	0	0	62	1.485e-34	0	eQTLcatalogue/Fairfax_2014_naive:PsychENCODE_eQTLs:eQTLGen_cis_eQTLs:GTEx/v8/Adipose_Subcutaneous	NA	Yes	IMR90	9.281e-10	rs35905305	81
ENSG00000139725	RHOF	12	122215664	122241309	-1	protein_coding	54509	RHOF	0.00520736	-0.238094	0	0	2	0.0004997	0.0402984	TIGER/Nom_Alonso_Pancreatic_islets	NA	Yes	Promoter_anchored_loops	0.03626	rs35905305	81
ENSG00000102678	FGF9	13	22245522	22278637	1	protein_coding	2254	FGF9	0.910716	-0.652471	0	0	1	1.6138e-06	0.0126069	eQTLGen_trans_eQTLs	NA	No	NA	0.03871	rs13054099	109
ENSG00000139514	SLC7A1	13	30083547	30169825	-1	protein_coding	6541	SLC7A1	0.574964	-1.02524	0	0	1	1.5678e-06	0.0122872	eQTLGen_trans_eQTLs	NA	Yes	Fetal_Cortex	4.084e-09	rs13054099;rs10507396;rs4617711	82:109
ENSG00000132952	USPL1	13	31191830	31233686	1	protein_coding	10208	USPL1	0.491297	-0.603996	0	0	8	2.17354e-05	0.0271695	GTEx/v8/Esophagus_Mucosa	NA	Yes	Fetal_Cortex:IMR90:Mesenchymal_Stem_Cell:Mesendoderm:Trophoblast-like_Cell	1.784e-10	rs7320000;rs10507396;rs9530139;rs7320000:rs10507396:rs10507396;rs7320000:rs10507396;rs4617711	82
ENSG00000175664	TEX26	13	31506840	31549639	1	protein_coding	122046	TEX26	8.72442e-09	-0.413139	0	0	1	1.6564e-07	0.0008282	eQTLcatalogue/CEDAR_ileum	NA	Yes	Liver:IMR90:Mesenchymal_Stem_Cell:Mesendoderm:Trophoblast-like_Cell:hESC	1.784e-10	rs9530139;rs10507396;rs4617711;rs7320000:rs10507396	82
ENSG00000120694	HSPH1	13	31710762	31736525	-1	protein_coding	10808	HSPH1	0.983009	-0.809054	20	11.05	143	4.4389e-66	0	eQTLcatalogue/BLUEPRINT_ge_T-cell:eQTLGen_cis_eQTLs:BIOSQTL/BIOS_eQTL_geneLevel:GTEx/v8/Whole_Blood:GTEx/v8/Cells_Cultured_fibroblasts:GTEx/v8/Skin_Sun_Exposed_Lower_leg:GTEx/v8/Thyroid:GTEx/v7/Skin_Sun_Exposed_Lower_leg	NA	Yes	Promoter_anchored_loops:Adult_Cortex:IMR90:Mesenchymal_Stem_Cell:Mesendoderm:Trophoblast-like_Cell	1.655e-12	rs7320000;rs10507396;rs4617711;rs9530139;rs1326306;rs9543859;rs4617711:rs7320000:rs10507396:rs9530139;rs4617711:rs1326306	82
ENSG00000187676	B3GALTL	13	31774073	31906413	1	protein_coding	145173	B3GALTL	2.01557e-10	1.41187	113	23.2	179	3.27170000000001e-310	0	TIGER/Nom_Alonso_Pancreatic_islets:Nom_InsPIRE_Islets_Gene_eQTLs_Nominal_Pvalues:EyeGEx:eQTLcatalogue/BLUEPRINT_ge_T-cell:eQTLcatalogue/BrainSeq_ge_brain:eQTLcatalogue/CEDAR_B-cell_CD19:eQTLcatalogue/CEDAR_ileum:eQTLcatalogue/CEDAR_monocyte_CD14:eQTLcatalogue/CEDAR_rectum:eQTLcatalogue/CEDAR_T-cell_CD4:eQTLcatalogue/CEDAR_T-cell_CD8:eQTLcatalogue/CEDAR_transverse_colon:eQTLcatalogue/Fairfax_2012_…	NA	Yes	Promoter_anchored_loops:Adult_Cortex:IMR90	1.655e-12	rs10507396;rs4617711;rs9530139;rs1326306;rs9543859;rs7320000;rs7320000:rs10507396:rs10507396;rs7320000:rs9530139;rs4617711:rs1326306;rs4617711:rs4617711:rs9530139;rs4617711:rs9530139;rs4617711:rs1326306:rs9530139:rs1326306	82
ENSG00000136108	CKAP2	13	53029564	53050763	1	protein_coding	26586	CKAP2	3.96232e-08	-0.19438	0	0	1	3.92455e-06	0.000770552	GTEx/v6/Brain_Cerebellum	NA	No	NA	2.433e-05	rs2759715	83
ENSG00000139675	HNRNPA1L2	13	53191605	53217919	1	protein_coding	144983	HNRNPA1L2	6.70373e-05	0.168523	0	0	1	0.000362687	2.54066e-18	GTEx/v8/Skin_Sun_Exposed_Lower_leg	NA	No	NA	8.76e-05	rs1343605	83
ENSG00000136110	LECT1	13	53277399	53313947	-1	protein_coding	11061	LECT1	6.68267e-06	0.0923413	0	0	20	1.65652e-05	0.0144139	GTEx/v8/Esophagus_Muscularis:GTEx/v8/Spleen:GTEx/v7/Esophagus_Muscularis	NA	Yes	Fetal_Cortex:Mesenchymal_Stem_Cell:Mesendoderm:Trophoblast-like_Cell:hESC	1.606e-12	rs1343605;rs2759715;rs9536381;rs2759715:rs9536381;rs2759715:rs1343605;rs9536381:rs1343605	83
ENSG00000136099	PCDH8	13	53418109	53422775	-1	protein_coding	5100	PCDH8	NA	-0.692641	0	0	65	4.261e-09	1.94677e-15	GTEx/v8/Nerve_Tibial:GTEx/v8/Minor_Salivary_Gland:GTEx/v7/Nerve_Tibial	NA	Yes	Promoter_anchored_loops:Adult_Cortex:Fetal_Cortex:Mesendoderm:Neural_Progenitor_Cell:Trophoblast-like_Cell:hESC	6.464e-14	rs1343605;rs9536381;rs2759715;rs2759715:rs1343605;rs2759715:rs9536381:rs1343605:rs1343605;rs9536381:rs9536381	83
ENSG00000102837	OLFM4	13	53602894	53626192	1	protein_coding	10562	OLFM4	2.41041e-06	0.814566	3	9.972	131	6.7344e-59	0	eQTLGen_cis_eQTLs:BIOSQTL/BIOS_eQTL_geneLevel:GTEx/v8/Artery_Aorta:GTEx/v7/Artery_Aorta:GTEx/v6/Artery_Aorta:GTEx/v6/Colon_Sigmoid	NA	Yes	Mesendoderm:Trophoblast-like_Cell:hESC	6.464e-14	rs1343605;rs9536381;rs2759715;rs2759715:rs1343605;rs9536381:rs1343605;rs2759715:rs9536381	83
ENSG00000184226	PCDH9	13	66876967	67804468	-1	protein_coding	5101	PCDH9	0.973014	-0.248673	31	16.8	0	NA	NA	NA	NA	Yes	Adult_Cortex:Fetal_Cortex:IMR90:Mesenchymal_Stem_Cell:Mesendoderm:Neural_Progenitor_Cell:Trophoblast-like_Cell:hESC	1.933e-09	rs9540729	84
ENSG00000102471	NDFIP2	13	80055287	80130210	1	protein_coding	54602	NDFIP2	0.801879	-0.744543	0	0	1	5.1692e-06	0.0337695	eQTLGen_trans_eQTLs	NA	Yes	Mesenchymal_Stem_Cell	5.575e-05	rs301806;rs9545393	0.100694
ENSG00000136158	SPRY2	13	80910111	80915086	-1	protein_coding	10253	SPRY2	0.930517	-0.791672	1	0.801	7	0.000149802	0.0105634	BRAINEAC/HIPP:GTEx/v8/Esophagus_Muscularis	NA	Yes	Left_Ventricle:IMR90:Mesenchymal_Stem_Cell:hESC	1.387e-07	rs9545393	85
ENSG00000125285	SOX21	13	95361886	95364389	-1	protein_coding	11166	SOX21	NA	-0.763646	0	0	1	6.238e-06	0.000503065	TIGER/Nom_Alonso_Pancreatic_islets	NA	Yes	Mesenchymal_Stem_Cell:Mesendoderm:Neural_Progenitor_Cell:Trophoblast-like_Cell:hESC	9.216e-09	rs141394175	87
ENSG00000125257	ABCC4	13	95672083	95953687	-1	protein_coding	10257	ABCC4	0.00131468	2.14608	4	3.852	1	1.1606e-09	3.61642e-26	eQTLGen_cis_eQTLs:GTEx/v8/Esophagus_Muscularis	NA	Yes	IMR90	9.216e-09	rs141394175	87
ENSG00000134873	CLDN10	13	96085858	96232013	1	protein_coding	9071	CLDN10	0.0459304	NA	1	1.179	13	4.14204e-07	2.99604e-06	EyeGEx:GTEx/v8/Breast_Mammary_Tissue	NA	Yes	IMR90:Mesenchymal_Stem_Cell:Mesendoderm:hESC	5.961e-07	rs141394175;rs3897950;rs7335011;rs11616450	87
ENSG00000134874	DZIP1	13	96230457	96296957	-1	protein_coding	22873	DZIP1	3.32706e-12	-0.796594	2	8.324	101	3.28022e-16	2.27026e-26	EyeGEx:eQTLcatalogue/GENCORD_ge_fibroblast:PsychENCODE_eQTLs:CMC_SVA_cis:GTEx/v8/Adipose_Subcutaneous:GTEx/v8/Adipose_Visceral_Omentum:GTEx/v8/Artery_Aorta:GTEx/v8/Artery_Coronary:GTEx/v8/Artery_Tibial:GTEx/v8/Esophagus_Gastroesophageal_Junction:GTEx/v8/Esophagus_Mucosa:GTEx/v8/Esophagus_Muscularis:GTEx/v8/Heart_Atrial_Appendage:GTEx/v8/Lung:GTEx/v8/Muscle_Skeletal:GTEx/v8/Nerve_Tibial:GTEx/v8/Ce…	NA	Yes	IMR90:Mesenchymal_Stem_Cell:Mesendoderm:hESC	4.651e-09	rs11616450;rs3897950;rs7335011;rs11616450:rs3897950	87
ENSG00000102580	DNAJC3	13	96329393	96447243	1	protein_coding	5611	DNAJC3	0.951081	-0.646266	5	14.04	26	4.4805e-09	1.05275e-17	eQTLcatalogue/Alasoo_2018_ge_macrophage_naive:PsychENCODE_eQTLs:eQTLGen_cis_eQTLs:GTEx/v8/Esophagus_Mucosa:GTEx/v8/Skin_Sun_Exposed_Lower_leg	NA	Yes	IMR90:Mesenchymal_Stem_Cell:Mesendoderm:hESC	9.406e-06	rs11616450;rs3897950	87
ENSG00000102595	UGGT2	13	96453834	96705736	-1	protein_coding	55757	UGGT2	1.01866e-21	-0.0667801	4	6.289	147	6.5157e-207	0	TIGER/Nom_Alonso_Pancreatic_islets:EyeGEx:eQTLcatalogue/BLUEPRINT_ge_monocyte:eQTLcatalogue/BLUEPRINT_ge_neutrophil:eQTLcatalogue/Fairfax_2014_IFN24:eQTLcatalogue/Fairfax_2014_LPS24:eQTLcatalogue/Fairfax_2014_naive:eQTLcatalogue/GENCORD_ge_LCL:eQTLcatalogue/Lepik_2017_ge_blood:eQTLcatalogue/Nedelec_2016_ge_macrophage_naive:eQTLcatalogue/Nedelec_2016_ge_macrophage_Salmonella:eQTLcatalogue/Quach_20…	NA	Yes	Mesenchymal_Stem_Cell:Mesendoderm:Trophoblast-like_Cell:hESC	4.651e-09	rs11616450;rs3897950;rs7335011	87
ENSG00000185352	HS6ST3	13	96743093	97485671	1	protein_coding	266722	HS6ST3	0.747378	NA	147	18.68	127	3.54482e-09	3.00119e-55	CMC_NoSVA_cis:GTEx/v8/Artery_Aorta:GTEx/v8/Artery_Tibial:GTEx/v8/Brain_Caudate_basal_ganglia:GTEx/v8/Brain_Nucleus_accumbens_basal_ganglia:GTEx/v8/Esophagus_Muscularis:GTEx/v8/Heart_Atrial_Appendage:GTEx/v8/Heart_Left_Ventricle:GTEx/v8/Muscle_Skeletal:GTEx/v8/Nerve_Tibial:GTEx/v8/Cells_Cultured_fibroblasts:GTEx/v8/Thyroid:GTEx/v7/Artery_Tibial	NA	Yes	Fetal_Cortex:Adrenal:Aorta:Left_Ventricle:Liver:IMR90:Mesenchymal_Stem_Cell:Mesendoderm:Neural_Progenitor_Cell:Trophoblast-like_Cell:hESC	4.651e-09	rs11616450;rs3897950;rs7335011;rs11616450:rs3897950:rs11616450;rs3897950:rs3897950	87
ENSG00000139793	MBNL2	13	97873688	98046374	1	protein_coding	10150	MBNL2	0.900896	-1.47595	0	0	1	1.2677e-05	0.0354984	eQTLGen_cis_eQTLs	NA	Yes	Mesendoderm:hESC	9.406e-06	rs11616450	87
ENSG00000125249	RAP2A	13	98086476	98121382	1	protein_coding	5911	RAP2A	0.71734	-1.15639	0	0	3	NA	0.009	CMC_SVA_cis:CMC_NoSVA_cis	NA	Yes	Mesenchymal_Stem_Cell:Mesendoderm	9.406e-06	rs3897950;rs11616450	87
ENSG00000065150	IPO5	13	98605912	98676551	1	protein_coding	3843	IPO5	0.999999	-0.567757	0	0	3	1.34301e-05	0.0307983	GTEx/v8/Spleen	NA	Yes	Promoter_anchored_loops:IMR90:Mesenchymal_Stem_Cell	1.639e-08	rs4772087	88
ENSG00000152767	FARP1	13	98794816	99102027	1	protein_coding	10160	FARP1	0.0452631	-0.444416	10	12.9	48	9.79324e-121	0	eQTLcatalogue/Quach_2016_ge_monocyte_IAV:eQTLcatalogue/Quach_2016_ge_monocyte_naive:PsychENCODE_eQTLs:DICE/T_CD4_naive:DICE/T_CD4_naive_activated:DICE/T_CD8_naive:DICE/T_CD8_naive_activated:DICE/Monocyte_non_classical:DICE/T_CD4_TFH:DICE/T_CD4_TH1:DICE/T_CD4_TH17:DICE/T_CD4_TH1_17:DICE/T_CD4_TH2:DICE/T_CD4_memory_TREG:DICE/T_CD4_naive_TREG:eQTLGen_cis_eQTLs:BIOSQTL/BIOS_eQTL_geneLevel:GTEx/v8/Adi…	NA	Yes	Adult_Cortex:Fetal_Cortex:Left_Ventricle:Liver:Pancreas:IMR90:Mesenchymal_Stem_Cell:Mesendoderm:Trophoblast-like_Cell:hESC	1.639e-08	rs4772087	88
ENSG00000102572	STK24	13	99102455	99230194	-1	protein_coding	8428	STK24	0.797998	0.417068	54	12.9	51	3.3249e-85	0	eQTLcatalogue/BLUEPRINT_ge_monocyte:eQTLcatalogue/BLUEPRINT_ge_neutrophil:eQTLcatalogue/BLUEPRINT_ge_T-cell:eQTLcatalogue/CEDAR_neutrophil_CD15:eQTLcatalogue/Fairfax_2012_B-cell_CD19:eQTLcatalogue/Lepik_2017_ge_blood:eQTLcatalogue/TwinsUK_ge_LCL:DICE/T_CD4_naive_activated:DICE/T_CD8_naive_activated:DICE/T_CD4_TH17:DICE/T_CD4_TH1_17:DICE/T_CD4_memory_TREG:eQTLGen_cis_eQTLs:BIOSQTL/BIOS_eQTL_geneLe…	NA	Yes	Promoter_anchored_loops:Adult_Cortex:Fetal_Cortex:Spleen:GM12878:IMR90:Mesenchymal_Stem_Cell	1.639e-08	rs4772087	88
ENSG00000088387	DOCK9	13	99445741	99738879	-1	protein_coding	23348	DOCK9	0.999999	-0.43441	0	0	3	8.38745e-06	0.0414439	GTEx/v7/Stomach	NA	Yes	Adult_Cortex:Fetal_Cortex	1.639e-08	rs4772087	88
ENSG00000125304	TM9SF2	13	100153671	100216260	1	protein_coding	9375	TM9SF2	0.999928	-0.620684	0	0	2	2.46425e-06	0.0102358	GTEx/v7/Brain_Cerebellar_Hemisphere	NA	No	NA	0.0007539	rs4772087	88
ENSG00000134899	ERCC5	13	103497194	103528345	1	protein_coding	2073	ERCC5	4.6477e-06	1.73697	0	0	1	1.2802e-06	0.010193	eQTLGen_trans_eQTLs	NA	No	NA	0.03871	rs13054099	109
ENSG00000102524	TNFSF13B	13	108903588	108960832	1	protein_coding	10673	TNFSF13B	0.954794	0.395396	0	0	1	2.8576e-06	0.0208037	eQTLGen_trans_eQTLs	NA	No	NA	0.02339	rs301806	1
ENSG00000165379	LRFN5	14	42076773	42373752	1	protein_coding	145581	LRFN5	0.712325	0.122069	225	21.5	280	1.72251e-111	1.74012e-107	EyeGEx:eQTLcatalogue/HipSci_ge_iPSC:PsychENCODE_eQTLs:CMC_SVA_cis:CMC_NoSVA_cis:GTEx/v8/Adipose_Subcutaneous:GTEx/v8/Adipose_Visceral_Omentum:GTEx/v8/Artery_Aorta:GTEx/v8/Artery_Tibial:GTEx/v8/Brain_Cerebellar_Hemisphere:GTEx/v8/Brain_Cerebellum:GTEx/v8/Brain_Cortex:GTEx/v8/Esophagus_Mucosa:GTEx/v8/Esophagus_Muscularis:GTEx/v8/Heart_Left_Ventricle:GTEx/v8/Lung:GTEx/v8/Nerve_Tibial:GTEx/v8/Cells_C…	NA	Yes	EP_correlation_cell_type_oneway:Fetal_Cortex:Left_Ventricle:Mesenchymal_Stem_Cell:Mesendoderm:Trophoblast-like_Cell:hESC	1.082e-13	rs61990289;rs1900599;rs56321769;rs10132715;rs56321769:rs1900599:rs61990289:rs61990289;rs1900599:rs61990289;rs56321769:rs61990289;rs10132715:rs56321769:rs1900599;rs10132715:rs10132715	89
ENSG00000165588	OTX2	14	57267425	57277197	-1	protein_coding	5015	OTX2	0.7446	-0.822575	11	15.21	0	NA	NA	NA	NA	Yes	IMR90:Mesenchymal_Stem_Cell:Mesendoderm:Neural_Progenitor_Cell:Trophoblast-like_Cell:hESC	1.326e-09	rs2274794	90
ENSG00000054654	SYNE2	14	64319683	64693165	1	protein_coding	23224	SYNE2	1.85335e-11	0.553679	54	13.29	163	1.8254e-144	0	eQTLcatalogue/CEDAR_transverse_colon:eQTLcatalogue/Fairfax_2012_B-cell_CD19:eQTLcatalogue/Kasela_2017_T-cell_CD4:eQTLcatalogue/Kasela_2017_T-cell_CD8:eQTLcatalogue/TwinsUK_ge_fat:eQTLGen_cis_eQTLs:BIOSQTL/BIOS_eQTL_geneLevel:GTEx/v8/Heart_Atrial_Appendage:GTEx/v8/Heart_Left_Ventricle:GTEx/v7/Heart_Atrial_Appendage:GTEx/v7/Heart_Left_Ventricle:GTEx/v6/Heart_Left_Ventricle	NA	Yes	Aorta:Left_Ventricle:Liver:Pancreas:GM12878:IMR90:Mesenchymal_Stem_Cell:Mesendoderm:Trophoblast-like_Cell:hESC	2.59e-10	rs7229	91
ENSG00000140009	ESR2	14	64550950	64804830	-1	protein_coding	2100	ESR2	5.15441e-08	-0.627425	114	13.29	163	6.45799e-183	0	eQTLcatalogue/GENCORD_ge_LCL:eQTLcatalogue/GEUVADIS_ge_LCL:eQTLcatalogue/TwinsUK_ge_blood:eQTLcatalogue/TwinsUK_ge_fat:eQTLcatalogue/TwinsUK_ge_LCL:eQTLcatalogue/TwinsUK_ge_skin:scRNA_eQTLs/T_CD4:scRNA_eQTLs/PBMC:DICE/T_CD4_naive:DICE/T_CD4_naive_activated:DICE/T_CD8_naive_activated:DICE/NK:DICE/T_CD4_TFH:DICE/T_CD4_TH1:DICE/T_CD4_TH17:DICE/T_CD4_TH1_17:DICE/T_CD4_TH2:DICE/T_CD4_memory_TREG:eQTLG…	NA	No	NA	2.59e-10	rs7229	91
ENSG00000100714	MTHFD1	14	64854749	64926722	1	protein_coding	4522	MTHFD1	0.605609	-0.471019	22	8.912	154	2.9925e-88	0	TIGER/Nom_Alonso_Pancreatic_islets:EyeGEx:eQTLcatalogue/BLUEPRINT_ge_monocyte:eQTLcatalogue/BLUEPRINT_ge_T-cell:eQTLcatalogue/Fairfax_2014_IFN24:eQTLcatalogue/Fairfax_2014_naive:eQTLcatalogue/GEUVADIS_ge_LCL:eQTLcatalogue/Lepik_2017_ge_blood:eQTLcatalogue/TwinsUK_ge_fat:eQTLcatalogue/TwinsUK_ge_LCL:eQTLcatalogue/TwinsUK_ge_skin:PsychENCODE_eQTLs:DICE/T_CD4_naive_activated:eQTLGen_cis_eQTLs:BIOSQT…	NA	Yes	IMR90:Mesenchymal_Stem_Cell	2.59e-10	rs7229	91
ENSG00000089775	ZBTB25	14	64915824	64971931	-1	protein_coding	7597	ZBTB25	3.31069e-05	NA	0	0	113	2.8573e-102	0	eQTLcatalogue/Fairfax_2012_B-cell_CD19:eQTLcatalogue/GENCORD_ge_T-cell:eQTLGen_cis_eQTLs:BIOSQTL/BIOS_eQTL_geneLevel:GTEx/v8/Muscle_Skeletal:GTEx/v8/Testis	NA	Yes	Liver:GM12878:IMR90:Mesenchymal_Stem_Cell:Trophoblast-like_Cell:hESC	2.59e-10	rs7229	91
ENSG00000126804	ZBTB1	14	64970430	65000408	1	protein_coding	22890	ZBTB1	0.973424	-0.449444	0	0	68	3.06295e-13	0	TIGER/Nom_Alonso_Pancreatic_islets:EyeGEx:BIOSQTL/BIOS_eQTL_geneLevel:GTEx/v8/Nerve_Tibial:GTEx/v8/Skin_Sun_Exposed_Lower_leg:GTEx/v7/Skin_Sun_Exposed_Lower_leg:GTEx/v6/Nerve_Tibial	NA	Yes	Liver:GM12878:IMR90:Mesenchymal_Stem_Cell:Trophoblast-like_Cell:hESC	5.962e-10	rs7229	91
ENSG00000126803	HSPA2	14	65002623	65009955	1	protein_coding	3306	HSPA2	NA	-0.736817	0	0	5	4.28155e-05	1.45074e-15	GTEx/v8/Cells_Cultured_fibroblasts	NA	Yes	Adult_Cortex:Fetal_Cortex	1.268e-09	rs7229	91
ENSG00000165807	PPP1R36	14	65016620	65056098	1	protein_coding	145376	PPP1R36	2.76563e-07	-0.0310025	0	0	4	2.78716e-06	2.11545e-18	GTEx/v8/Testis	NA	No	NA	3.803e-06	rs7229	91
ENSG00000126822	PLEKHG3	14	65170820	65213610	1	protein_coding	26030	PLEKHG3	1.16377e-08	-1.35076	0	0	69	3.3861e-08	2.38882e-17	eQTLGen_cis_eQTLs:GTEx/v8/Artery_Tibial:GTEx/v8/Cells_Cultured_fibroblasts:GTEx/v8/Stomach	NA	Yes	Mesenchymal_Stem_Cell:Trophoblast-like_Cell	2.59e-10	rs7229	91
ENSG00000070182	SPTB	14	65213002	65346601	-1	protein_coding	6710	SPTB	1	0.434589	0	0	8	1.10545e-05	0.000462014	eQTLGen_cis_eQTLs:CMC_SVA_cis:GTEx/v7/Heart_Left_Ventricle:GTEx/v7/Cells_Transformed_fibroblasts	NA	Yes	Fetal_Cortex:IMR90:Mesenchymal_Stem_Cell:Mesendoderm:Trophoblast-like_Cell	2.59e-10	rs7229	91
ENSG00000258289	CHURC1	14	65381079	65411309	1	protein_coding	91612	CHURC1	3.13272e-05	1.47722	0	0	28	1.4085e-23	0	eQTLcatalogue/CEDAR_B-cell_CD19:eQTLcatalogue/Lepik_2017_ge_blood:eQTLGen_cis_eQTLs	NA	Yes	Fetal_Cortex	9.395e-07	rs7229	91
ENSG00000257365	FNTB	14	65381203	65529368	1	protein_coding	100529261	FNTB	0.172001	-0.965646	0	0	13	8.0983e-09	5.79822e-05	eQTLGen_cis_eQTLs:CMC_SVA_cis	NA	Yes	Fetal_Cortex	1.065e-06	rs7229	91
ENSG00000176153	GPX2	14	65405870	65409531	-1	protein_coding	2877	GPX2	0.00231703	-0.184435	0	0	7	2.9577e-05	0.0316502	GTEx/v8/Brain_Caudate_basal_ganglia	NA	Yes	Mesenchymal_Stem_Cell	5.962e-10	rs7229	91
ENSG00000006432	MAP3K9	14	71189243	71276251	-1	protein_coding	4293	MAP3K9	0.923395	NA	2	9.463	0	NA	NA	NA	NA	No	NA	1.057e-09	rs548831163	92
ENSG00000119725	ZNF410	14	74353320	74399214	1	protein_coding	57862	ZNF410	0.661706	-0.0701003	0	0	1	2.95076e-05	0.0127688	GTEx/v8/Artery_Coronary	NA	No	NA	1.948e-08	rs11159104	93
ENSG00000187097	ENTPD5	14	74424713	74486102	-1	protein_coding	957	ENTPD5	0.000105198	1.56631	0	0	8	NA	0.009	CMC_SVA_cis	NA	Yes	Promoter_anchored_loops	1.948e-08	rs11159104	93
ENSG00000119655	NPC2	14	74942895	74960880	-1	protein_coding	10577	NPC2	0.00870069	NA	0	0	9	6.0054e-06	2.27233e-11	eQTLGen_cis_eQTLs:GTEx/v8/Skin_Sun_Exposed_Lower_leg	NA	Yes	Adult_Cortex:Fetal_Cortex:Aorta:Left_Ventricle:Liver:IMR90:Mesenchymal_Stem_Cell:Mesendoderm:Trophoblast-like_Cell:hESC	1.53e-12	rs11159104	93
ENSG00000165898	ISCA2	14	74960423	74963809	1	protein_coding	122961	ISCA2	6.27266e-05	0.667703	0	0	42	5.2603e-13	0	eQTLGen_cis_eQTLs	NA	Yes	Adult_Cortex:Fetal_Cortex:Aorta:Left_Ventricle:Liver:IMR90:Mesenchymal_Stem_Cell:Mesendoderm:Trophoblast-like_Cell:hESC	1.53e-12	rs11159104	93
ENSG00000119681	LTBP2	14	74964873	75079306	-1	protein_coding	4053	LTBP2	0.0187347	-0.951916	3	12.98	70	7.11356e-60	0	eQTLcatalogue/BLUEPRINT_ge_neutrophil:eQTLcatalogue/Lepik_2017_ge_blood:eQTLcatalogue/TwinsUK_ge_blood:eQTLcatalogue/TwinsUK_ge_skin:eQTLGen_cis_eQTLs:BIOSQTL/BIOS_eQTL_geneLevel:GTEx/v8/Whole_Blood:GTEx/v8/Artery_Aorta:GTEx/v8/Skin_Not_Sun_Exposed_Suprapubic:GTEx/v8/Skin_Sun_Exposed_Lower_leg:GTEx/v7/Whole_Blood:GTEx/v7/Artery_Aorta:GTEx/v7/Skin_Not_Sun_Exposed_Suprapubic:GTEx/v7/Skin_Sun_Expose…	NA	Yes	IMR90:Mesenchymal_Stem_Cell	1.53e-12	rs11159104	93
ENSG00000119682	AREL1	14	75120140	75179818	-1	protein_coding	9870	AREL1	0.0118021	-0.560095	19	13.07	80	3.75326e-22	2.40884e-19	eQTLcatalogue/BLUEPRINT_ge_monocyte:eQTLcatalogue/BrainSeq_ge_brain:eQTLcatalogue/Quach_2016_ge_monocyte_R848:PsychENCODE_eQTLs:CMC_SVA_cis:CMC_NoSVA_cis:GTEx/v8/Artery_Tibial:GTEx/v8/Brain_Caudate_basal_ganglia:GTEx/v8/Brain_Cerebellar_Hemisphere:GTEx/v8/Brain_Cortex:GTEx/v8/Brain_Frontal_Cortex_BA9:GTEx/v8/Brain_Nucleus_accumbens_basal_ganglia:GTEx/v8/Breast_Mammary_Tissue:GTEx/v8/Esophagus_Muc…	NA	Yes	Promoter_anchored_loops:IMR90:Mesenchymal_Stem_Cell	1.53e-12	rs11159104	93
ENSG00000214670	AC007956.1	14	75158879	75179800	-1	protein_coding	NA	NA	NA	NA	13	13.07	5	8.59967e-05	0.00738359	PsychENCODE_eQTLs	NA	Yes	Promoter_anchored_loops:IMR90:Mesenchymal_Stem_Cell	8.235e-12	rs11159104	93
ENSG00000119616	FCF1	14	75179847	75203394	1	protein_coding	51077	FCF1	0.934257	-1.34336	10	8.888	48	2.4386e-27	0	eQTLcatalogue/BLUEPRINT_ge_monocyte:eQTLcatalogue/BLUEPRINT_ge_neutrophil:eQTLcatalogue/Nedelec_2016_ge_macrophage_naive:eQTLcatalogue/Quach_2016_ge_monocyte_IAV:eQTLGen_cis_eQTLs:BIOSQTL/BIOS_eQTL_geneLevel:GTEx/v8/Whole_Blood:GTEx/v8/Esophagus_Muscularis:GTEx/v8/Muscle_Skeletal:GTEx/v8/Skin_Not_Sun_Exposed_Suprapubic:GTEx/v6/Adipose_Subcutaneous	NA	Yes	Promoter_anchored_loops:IMR90:Mesenchymal_Stem_Cell	1.53e-12	rs11159104	93
ENSG00000119596	YLPM1	14	75230069	75322244	1	protein_coding	56252	YLPM1	0.999933	-0.911821	47	13.1	93	6.6422e-12	2.93978e-09	EyeGEx:GTEx/v8/Adipose_Subcutaneous:GTEx/v8/Heart_Atrial_Appendage:GTEx/v8/Nerve_Tibial:GTEx/v8/Cells_Cultured_fibroblasts:GTEx/v8/Testis:GTEx/v7/Brain_Spinal_cord_cervical_c-1:GTEx/v7/Heart_Atrial_Appendage:GTEx/v7/Nerve_Tibial:GTEx/v6/Adipose_Subcutaneous:GTEx/v6/Nerve_Tibial	NA	Yes	Promoter_anchored_loops:Left_Ventricle:Liver:GM12878:IMR90:Mesenchymal_Stem_Cell:Mesendoderm:Trophoblast-like_Cell:hESC	1.53e-12	rs11159104	93
ENSG00000119608	PROX2	14	75319736	75330537	-1	protein_coding	283571	PROX2	7.88535e-07	0.50268	19	13.08	72	6.8073e-19	0	eQTLcatalogue/TwinsUK_ge_fat:eQTLGen_cis_eQTLs:BIOSQTL/BIOS_eQTL_geneLevel:GTEx/v8/Adipose_Subcutaneous:GTEx/v8/Adipose_Visceral_Omentum:GTEx/v8/Artery_Tibial:GTEx/v8/Breast_Mammary_Tissue:GTEx/v8/Lung:GTEx/v8/Muscle_Skeletal:GTEx/v8/Nerve_Tibial:GTEx/v8/Ovary:GTEx/v8/Skin_Not_Sun_Exposed_Suprapubic:GTEx/v8/Skin_Sun_Exposed_Lower_leg:GTEx/v8/Thyroid:GTEx/v7/Adipose_Subcutaneous:GTEx/v7/Artery_Tib…	NA	Yes	Aorta:Left_Ventricle:Liver:Lung:Pancreas:Spleen:GM12878:IMR90:Mesenchymal_Stem_Cell:Mesendoderm:Trophoblast-like_Cell:hESC	1.53e-12	rs11159104	93
ENSG00000119689	DLST	14	75348594	75370448	1	protein_coding	1743	DLST	0.950394	0.114612	17	15.09	101	9.06058e-91	1.97836e-79	TIGER/Nom_Alonso_Pancreatic_islets:EyeGEx:eQTLcatalogue/BLUEPRINT_ge_monocyte:eQTLcatalogue/BLUEPRINT_ge_T-cell:eQTLcatalogue/Fairfax_2014_naive:PsychENCODE_eQTLs:CMC_SVA_cis:CMC_NoSVA_cis:GTEx/v8/Brain_Cerebellum:GTEx/v8/Esophagus_Mucosa:GTEx/v8/Heart_Atrial_Appendage:GTEx/v8/Heart_Left_Ventricle:GTEx/v8/Muscle_Skeletal:GTEx/v8/Thyroid:GTEx/v7/Adipose_Subcutaneous:GTEx/v7/Heart_Atrial_Appendage:…	NA	Yes	Adult_Cortex:Aorta:Left_Ventricle:Liver:Lung:Pancreas:Spleen:GM12878:IMR90:Mesenchymal_Stem_Cell:Mesendoderm:Trophoblast-like_Cell:hESC	1.53e-12	rs11159104	93
ENSG00000198208	RPS6KL1	14	75370657	75390099	-1	protein_coding	83694	RPS6KL1	0.000674281	0.895648	12	15.09	89	1.8865e-155	0	eQTLcatalogue/BLUEPRINT_ge_T-cell:eQTLcatalogue/GENCORD_ge_fibroblast:eQTLcatalogue/GENCORD_ge_T-cell:eQTLcatalogue/GEUVADIS_ge_LCL:eQTLcatalogue/TwinsUK_ge_blood:eQTLcatalogue/TwinsUK_ge_fat:eQTLcatalogue/TwinsUK_ge_LCL:eQTLcatalogue/TwinsUK_ge_skin:PsychENCODE_eQTLs:DICE/T_CD8_naive:DICE/Monocyte_non_classical:DICE/NK:DICE/T_CD4_TFH:DICE/T_CD4_TH1_17:DICE/T_CD4_TH2:eQTLGen_cis_eQTLs:BIOSQTL/BIO…	NA	Yes	Adult_Cortex:Aorta:Left_Ventricle:Liver:Lung:Right_Ventricle:Spleen:GM12878:IMR90:Mesenchymal_Stem_Cell:Mesendoderm:Neural_Progenitor_Cell:Trophoblast-like_Cell:hESC	1.53e-12	rs11159104	93
ENSG00000119630	PGF	14	75408537	75422487	-1	protein_coding	5228	PGF	0.898304	0.707089	1	5.69	75	1.92729e-106	0	EyeGEx:eQTLcatalogue/GENCORD_ge_T-cell:eQTLcatalogue/TwinsUK_ge_LCL:DICE/B_cell_naive:DICE/T_CD4_naive:DICE/T_CD8_naive:DICE/Monocyte_classical:DICE/Monocyte_non_classical:DICE/T_CD4_TFH:DICE/T_CD4_TH1:DICE/T_CD4_TH17:DICE/T_CD4_TH1_17:DICE/T_CD4_TH2:DICE/T_CD4_memory_TREG:DICE/T_CD4_naive_TREG:eQTLGen_cis_eQTLs:BIOSQTL/BIOS_eQTL_geneLevel:GTEx/v8/Colon_Sigmoid:GTEx/v8/Colon_Transverse:GTEx/v8/Es…	NA	Yes	Adult_Cortex:Aorta:Dorsolateral_Prefrontal_Cortex:Left_Ventricle:Liver:Lung:Spleen:GM12878:IMR90:Mesenchymal_Stem_Cell:Mesendoderm:Trophoblast-like_Cell:hESC	1.53e-12	rs11159104	93
ENSG00000119718	EIF2B2	14	75469614	75476292	1	protein_coding	8892	EIF2B2	0.000428256	-0.0390456	2	8.229	96	3.27170000000001e-310	0	TIGER/Nom_Alonso_Pancreatic_islets:EyeGEx:eQTLcatalogue/Alasoo_2018_ge_macrophage_IFNg_Salmonella:eQTLcatalogue/Alasoo_2018_ge_macrophage_IFNg:eQTLcatalogue/Alasoo_2018_ge_macrophage_naive:eQTLcatalogue/Alasoo_2018_ge_macrophage_Salmonella:eQTLcatalogue/BLUEPRINT_ge_monocyte:eQTLcatalogue/BLUEPRINT_ge_T-cell:eQTLcatalogue/BrainSeq_ge_brain:eQTLcatalogue/CEDAR_B-cell_CD19:eQTLcatalogue/CEDAR_monoc…	NA	Yes	Adult_Cortex:Left_Ventricle:Liver:GM12878:IMR90:Mesenchymal_Stem_Cell:Mesendoderm:Trophoblast-like_Cell:hESC	1.53e-12	rs11159104	93
ENSG00000119684	MLH3	14	75480467	75518235	-1	protein_coding	27030	MLH3	0.000425002	-0.700881	4	8.229	85	3.27170000000001e-310	0	TIGER/Nom_Alonso_Pancreatic_islets:eQTLcatalogue/Alasoo_2018_ge_macrophage_naive:eQTLcatalogue/CEDAR_B-cell_CD19:eQTLcatalogue/CEDAR_platelet:eQTLcatalogue/CEDAR_rectum:eQTLcatalogue/CEDAR_T-cell_CD8:eQTLcatalogue/Fairfax_2014_IFN24:eQTLcatalogue/Fairfax_2014_LPS24:eQTLcatalogue/Fairfax_2014_naive:eQTLcatalogue/GENCORD_ge_fibroblast:eQTLcatalogue/GEUVADIS_ge_LCL:eQTLcatalogue/HipSci_ge_iPSC:eQTLc…	NA	Yes	Promoter_anchored_loops:Adult_Cortex:Aorta:Dorsolateral_Prefrontal_Cortex:Left_Ventricle:Liver:Lung:Pancreas:Right_Ventricle:Spleen:GM12878:IMR90:Mesenchymal_Stem_Cell:Mesendoderm:Trophoblast-like_Cell:hESC	1.53e-12	rs11159104	93
ENSG00000119640	ACYP1	14	75519924	75536186	-1	protein_coding	97	ACYP1	0.223002	-0.0927418	2	0.888	30	9.80269e-31	0	EyeGEx:eQTLcatalogue/Fairfax_2012_B-cell_CD19:eQTLcatalogue/Fairfax_2014_IFN24:eQTLcatalogue/Fairfax_2014_LPS24:eQTLcatalogue/Fairfax_2014_naive:eQTLcatalogue/Kasela_2017_T-cell_CD4:PsychENCODE_eQTLs:eQTLGen_cis_eQTLs:BIOSQTL/BIOS_eQTL_geneLevel:CMC_SVA_cis:GTEx/v8/Brain_Frontal_Cortex_BA9:GTEx/v8/Esophagus_Mucosa:GTEx/v8/Esophagus_Muscularis:GTEx/v8/Heart_Left_Ventricle:GTEx/v7/Esophagus_Mucosa:…	NA	Yes	Adult_Cortex:Aorta:Dorsolateral_Prefrontal_Cortex:Left_Ventricle:Liver:Lung:Pancreas:Right_Ventricle:Spleen:GM12878:IMR90:Mesenchymal_Stem_Cell:Mesendoderm:Neural_Progenitor_Cell:Trophoblast-like_Cell:hESC	1.53e-12	rs11159104	93
ENSG00000119703	ZC2HC1C	14	75530873	75545126	1	protein_coding	79696	ZC2HC1C	1.62188e-06	-0.426602	2	0.888	47	2.89518e-50	1.43803e-47	eQTLcatalogue/BrainSeq_ge_brain:PsychENCODE_eQTLs:xQTLServer_eQTLs:CMC_SVA_cis:CMC_NoSVA_cis:BRAINEAC/PUTM:GTEx/v8/Brain_Cerebellum:GTEx/v8/Brain_Cortex:GTEx/v8/Brain_Frontal_Cortex_BA9:GTEx/v8/Brain_Nucleus_accumbens_basal_ganglia:GTEx/v8/Brain_Putamen_basal_ganglia:GTEx/v8/Heart_Left_Ventricle:GTEx/v8/Pancreas:GTEx/v8/Testis:GTEx/v7/Adipose_Subcutaneous:GTEx/v7/Brain_Cortex:GTEx/v7/Brain_Fronta…	NA	Yes	Adult_Cortex:Aorta:Dorsolateral_Prefrontal_Cortex:Left_Ventricle:Liver:Lung:Pancreas:Right_Ventricle:Spleen:GM12878:IMR90:Mesenchymal_Stem_Cell:Mesendoderm:Neural_Progenitor_Cell:Trophoblast-like_Cell:hESC	1.53e-12	rs11159104	93
ENSG00000119638	NEK9	14	75548822	75594047	-1	protein_coding	91754	NEK9	1.19202e-06	-0.674712	1	3.604	55	4.76788e-18	0	eQTLcatalogue/BLUEPRINT_ge_neutrophil:eQTLcatalogue/Quach_2016_ge_monocyte_Pam3CSK4:eQTLcatalogue/Quach_2016_ge_monocyte_R848:eQTLGen_cis_eQTLs:BIOSQTL/BIOS_eQTL_geneLevel:GTEx/v8/Adipose_Subcutaneous:GTEx/v8/Whole_Blood:GTEx/v8/Artery_Aorta:GTEx/v8/Artery_Tibial:GTEx/v8/Brain_Caudate_basal_ganglia:GTEx/v8/Esophagus_Mucosa:GTEx/v8/Heart_Atrial_Appendage:GTEx/v8/Heart_Left_Ventricle:GTEx/v8/Cells_…	NA	Yes	Adult_Cortex:Aorta:Hippocampus:Left_Ventricle:Liver:Lung:Right_Ventricle:Spleen:GM12878:IMR90:Mesenchymal_Stem_Cell:Mesendoderm:Neural_Progenitor_Cell:Trophoblast-like_Cell:hESC	1.53e-12	rs11159104	93
ENSG00000170348	TMED10	14	75598173	75643334	-1	protein_coding	10972	TMED10	0.718151	-0.509671	2	14.55	13	2.5452e-10	4.32072e-07	eQTLcatalogue/CEDAR_B-cell_CD19:eQTLcatalogue/CEDAR_monocyte_CD14:eQTLcatalogue/CEDAR_T-cell_CD4:eQTLcatalogue/TwinsUK_ge_fat:CMC_SVA_cis:GTEx/v8/Muscle_Skeletal:GTEx/v8/Testis:GTEx/v7/Muscle_Skeletal:GTEx/v7/Testis:GTEx/v6/Muscle_Skeletal	NA	Yes	Adult_Cortex:Fetal_Cortex:Left_Ventricle:GM12878:IMR90:Mesenchymal_Stem_Cell:Trophoblast-like_Cell	1.53e-12	rs11159104	93
ENSG00000100721	TCL1A	14	96176304	96180533	-1	protein_coding	8115	TCL1A	0.0012233	-0.519151	0	0	1	4.4549e-08	0.000618673	eQTLGen_trans_eQTLs	NA	No	NA	1.391e-05	rs9074	107
ENSG00000198752	CDC42BPB	14	103398716	103523799	-1	protein_coding	9578	CDC42BPB	1	NA	0	0	30	1.9059e-12	0	eQTLGen_cis_eQTLs	NA	No	NA	1.851e-11	rs2403193	94
ENSG00000205436	EXOC3L4	14	103566481	103576896	1	protein_coding	91828	EXOC3L4	3.12925e-07	-0.0519296	0	0	2	0.000120716	1.09453e-08	GTEx/v8/Thyroid	NA	No	NA	0.001021	rs2403193	94
ENSG00000185215	TNFAIP2	14	103589779	103603776	1	protein_coding	7127	TNFAIP2	0.00267821	0.498501	0	0	1	7.501e-05	0.00604919	TIGER/Nom_Alonso_Pancreatic_islets	NA	Yes	EP_links_oneway:Promoter_anchored_loops:EP_correlation_organ_oneway	1.245e-10	rs2403193	94
ENSG00000100664	EIF5	14	103799881	103811362	1	protein_coding	1983	EIF5	0.90786	1.42789	0	0	84	7.6963e-94	0	eQTLcatalogue/Fairfax_2014_IFN24:eQTLcatalogue/Fairfax_2014_LPS24:eQTLcatalogue/Fairfax_2014_naive:PsychENCODE_eQTLs:eQTLGen_cis_eQTLs:BIOSQTL/BIOS_eQTL_geneLevel:GTEx/v8/Heart_Atrial_Appendage	NA	Yes	Promoter_anchored_loops:Adult_Cortex:Fetal_Cortex:Left_Ventricle:Liver:Spleen:GM12878:IMR90:Mesenchymal_Stem_Cell:Mesendoderm:Trophoblast-like_Cell:hESC	1.851e-11	rs2403193	94
ENSG00000075413	MARK3	14	103851729	103970168	1	protein_coding	4140	MARK3	6.11449e-05	-0.0999703	74	13.91	146	3.27170000000001e-310	0	EyeGEx:eQTLcatalogue/Alasoo_2018_ge_macrophage_IFNg:eQTLcatalogue/Alasoo_2018_ge_macrophage_naive:eQTLcatalogue/Alasoo_2018_ge_macrophage_Salmonella:eQTLcatalogue/BLUEPRINT_ge_monocyte:eQTLcatalogue/BLUEPRINT_ge_neutrophil:eQTLcatalogue/CEDAR_monocyte_CD14:eQTLcatalogue/CEDAR_neutrophil_CD15:eQTLcatalogue/Fairfax_2014_naive:eQTLcatalogue/GEUVADIS_ge_LCL:eQTLcatalogue/Lepik_2017_ge_blood:eQTLcatal…	NA	Yes	Promoter_anchored_loops:EP_correlation_cell_type_oneway:EP_correlation_organ_oneway:Adult_Cortex:Fetal_Cortex:Left_Ventricle:Liver:Right_Ventricle:Spleen:GM12878:IMR90:Mesenchymal_Stem_Cell:Mesendoderm:Trophoblast-like_Cell:hESC	1.851e-11	rs2403193	94
ENSG00000166165	CKB	14	103985996	103989448	-1	protein_coding	1152	CKB	0.850845	NA	7	11.32	120	8.7666e-138	0	TIGER/Nom_Alonso_Pancreatic_islets:eQTLcatalogue/BLUEPRINT_ge_monocyte:eQTLcatalogue/Fairfax_2014_IFN24:eQTLcatalogue/Fairfax_2014_LPS24:eQTLcatalogue/GENCORD_ge_fibroblast:eQTLcatalogue/Lepik_2017_ge_blood:eQTLcatalogue/TwinsUK_ge_LCL:eQTLcatalogue/TwinsUK_ge_skin:eQTLGen_cis_eQTLs:BIOSQTL/BIOS_eQTL_geneLevel:GTEx/v8/Whole_Blood:GTEx/v8/Artery_Aorta:GTEx/v8/Artery_Tibial:GTEx/v8/Esophagus_Mucosa…	NA	Yes	Promoter_anchored_loops:Adult_Cortex:Fetal_Cortex	1.851e-11	rs2403193	94
ENSG00000166166	TRMT61A	14	103995521	104003410	1	protein_coding	115708	TRMT61A	0.00570206	0.113457	7	11.32	134	3.3382e-127	0	TIGER/Nom_Alonso_Pancreatic_islets:eQTLcatalogue/BrainSeq_ge_brain:eQTLcatalogue/Fairfax_2014_IFN24:eQTLcatalogue/Fairfax_2014_LPS24:eQTLcatalogue/Fairfax_2014_LPS2:eQTLcatalogue/Fairfax_2014_naive:eQTLcatalogue/TwinsUK_ge_fat:eQTLcatalogue/TwinsUK_ge_LCL:PsychENCODE_eQTLs:eQTLGen_cis_eQTLs:BIOSQTL/BIOS_eQTL_geneLevel:xQTLServer_eQTLs:CMC_SVA_cis:CMC_NoSVA_cis:GTEx/v8/Adipose_Subcutaneous:GTEx/v8…	NA	Yes	Promoter_anchored_loops	1.851e-11	rs2403193	94
ENSG00000166170	BAG5	14	104022881	104029168	-1	protein_coding	9529	BAG5	0.0432182	-0.768927	7	4.077	137	7.8645e-87	0	TIGER/Nom_Alonso_Pancreatic_islets:EyeGEx:eQTLcatalogue/BLUEPRINT_ge_monocyte:eQTLcatalogue/BLUEPRINT_ge_neutrophil:eQTLcatalogue/BLUEPRINT_ge_T-cell:eQTLcatalogue/CEDAR_B-cell_CD19:eQTLcatalogue/CEDAR_ileum:eQTLcatalogue/CEDAR_monocyte_CD14:eQTLcatalogue/CEDAR_neutrophil_CD15:eQTLcatalogue/CEDAR_rectum:eQTLcatalogue/CEDAR_T-cell_CD4:eQTLcatalogue/CEDAR_T-cell_CD8:eQTLcatalogue/CEDAR_transverse_c…	NA	Yes	Promoter_anchored_loops:IMR90:Mesenchymal_Stem_Cell:Mesendoderm	1.851e-11	rs2403193	94
ENSG00000126214	KLC1	14	104028233	104167888	1	protein_coding	3831	KLC1	0.514955	NA	68	10.39	132	4.552e-265	0	EyeGEx:eQTLcatalogue/Alasoo_2018_ge_macrophage_IFNg:eQTLcatalogue/Alasoo_2018_ge_macrophage_naive:eQTLcatalogue/BLUEPRINT_ge_monocyte:eQTLcatalogue/BLUEPRINT_ge_neutrophil:eQTLcatalogue/BLUEPRINT_ge_T-cell:eQTLcatalogue/CEDAR_neutrophil_CD15:eQTLcatalogue/Fairfax_2014_naive:eQTLcatalogue/Lepik_2017_ge_blood:eQTLcatalogue/Naranbhai_2015_neutrophil_CD16:eQTLcatalogue/Quach_2016_ge_monocyte_LPS:eQTL…	NA	Yes	Promoter_anchored_loops:IMR90:Mesenchymal_Stem_Cell:Mesendoderm	1.851e-11	rs2403193	94
ENSG00000256053	APOPT1	14	104029299	104073860	1	protein_coding	84334	APOPT1	0.000361376	-0.703676	30	10.39	92	3.73081e-55	0	TIGER/Nom_Alonso_Pancreatic_islets:eQTLcatalogue/GEUVADIS_ge_LCL:PsychENCODE_eQTLs:BIOSQTL/BIOS_eQTL_geneLevel:GTEx/v8/Cells_EBV-transformed_lymphocytes:GTEx/v8/Brain_Caudate_basal_ganglia:GTEx/v8/Brain_Cortex:GTEx/v8/Brain_Frontal_Cortex_BA9:GTEx/v8/Brain_Hippocampus:GTEx/v8/Brain_Nucleus_accumbens_basal_ganglia:GTEx/v8/Brain_Putamen_basal_ganglia:GTEx/v8/Esophagus_Mucosa:GTEx/v8/Esophagus_Muscu…	NA	Yes	Promoter_anchored_loops:IMR90:Mesenchymal_Stem_Cell:Mesendoderm	1.851e-11	rs2403193	94
ENSG00000256500	RP11-73M18.2	14	104029299	104152261	1	protein_coding	3831	NA	NA	NA	59	10.39	82	2.7555e-79	0	TIGER/Nom_Alonso_Pancreatic_islets:EyeGEx:PsychENCODE_eQTLs:BIOSQTL/BIOS_eQTL_geneLevel	NA	Yes	Promoter_anchored_loops:IMR90:Mesenchymal_Stem_Cell:Mesendoderm	1.851e-11	rs2403193	94
ENSG00000126215	XRCC3	14	104163946	104181841	-1	protein_coding	7517	XRCC3	6.31833e-08	0.467663	10	8.404	119	1.6524e-217	0	eQTLcatalogue/BLUEPRINT_ge_monocyte:eQTLcatalogue/BLUEPRINT_ge_T-cell:eQTLcatalogue/BrainSeq_ge_brain:eQTLcatalogue/Fairfax_2012_B-cell_CD19:eQTLcatalogue/GENCORD_ge_LCL:eQTLcatalogue/GEUVADIS_ge_LCL:eQTLcatalogue/HipSci_ge_iPSC:eQTLcatalogue/Lepik_2017_ge_blood:eQTLcatalogue/TwinsUK_ge_fat:eQTLcatalogue/TwinsUK_ge_LCL:DICE/B_cell_naive:eQTLGen_cis_eQTLs:BIOSQTL/BIOS_eQTL_geneLevel:xQTLServer_eQT…	NA	Yes	Promoter_anchored_loops:EP_correlation_cell_type_oneway:Adult_Cortex:Fetal_Cortex:Left_Ventricle:IMR90:Mesenchymal_Stem_Cell:Mesendoderm:Trophoblast-like_Cell:hESC	1.851e-11	rs2403193	94
ENSG00000224997	AL049840.1	14	104177607	104179149	1	protein_coding	NA	NA	NA	NA	3	8.404	112	8.1357e-174	0	PsychENCODE_eQTLs:eQTLGen_cis_eQTLs:BIOSQTL/BIOS_eQTL_geneLevel:GTEx/v7/Adipose_Subcutaneous:GTEx/v7/Adipose_Visceral_Omentum:GTEx/v7/Adrenal_Gland:GTEx/v7/Cells_EBV-transformed_lymphocytes:GTEx/v7/Whole_Blood:GTEx/v7/Artery_Aorta:GTEx/v7/Artery_Coronary:GTEx/v7/Artery_Tibial:GTEx/v7/Brain_Caudate_basal_ganglia:GTEx/v7/Brain_Cerebellum:GTEx/v7/Brain_Cortex:GTEx/v7/Breast_Mammary_Tissue:GTEx/v7/Co…	NA	Yes	Promoter_anchored_loops:Adult_Cortex:Left_Ventricle:IMR90:Mesenchymal_Stem_Cell:Mesendoderm:Trophoblast-like_Cell:hESC	1.851e-11	rs2403193	94
ENSG00000100711	ZFYVE21	14	104182067	104200005	1	protein_coding	79038	ZFYVE21	0.713443	NA	1	8.404	85	7.7501e-15	0	eQTLcatalogue/CEDAR_rectum:eQTLcatalogue/Fairfax_2012_B-cell_CD19:eQTLcatalogue/GEUVADIS_ge_LCL:eQTLcatalogue/TwinsUK_ge_LCL:eQTLGen_cis_eQTLs:BIOSQTL/BIOS_eQTL_geneLevel:GTEx/v8/Whole_Blood:GTEx/v8/Artery_Tibial:GTEx/v8/Colon_Sigmoid:GTEx/v8/Esophagus_Muscularis:GTEx/v8/Nerve_Tibial:GTEx/v8/Cells_Cultured_fibroblasts:GTEx/v7/Breast_Mammary_Tissue	NA	Yes	Promoter_anchored_loops:EP_correlation_cell_type_oneway:Adult_Cortex:Fetal_Cortex:Left_Ventricle:IMR90:Mesenchymal_Stem_Cell:Mesendoderm:Trophoblast-like_Cell:hESC	1.851e-11	rs2403193	94
ENSG00000088808	PPP1R13B	14	104200089	104313927	-1	protein_coding	23368	PPP1R13B	0.976929	-0.731116	0	0	24	5.4735e-08	1.14914e-19	eQTLcatalogue/TwinsUK_ge_LCL:PsychENCODE_eQTLs:eQTLGen_cis_eQTLs:BIOSQTL/BIOS_eQTL_geneLevel:CMC_SVA_cis:GTEx/v8/Adipose_Subcutaneous:GTEx/v8/Esophagus_Muscularis:GTEx/v8/Skin_Sun_Exposed_Lower_leg:GTEx/v8/Thyroid:GTEx/v7/Esophagus_Muscularis	NA	No	NA	1.245e-10	rs2403193	94
ENSG00000156411	C14orf2	14	104378625	104394606	-1	protein_coding	9556	C14orf2	0.658635	0.198762	0	0	11	4.116e-08	4.44444e-14	eQTLGen_cis_eQTLs:GTEx/v8/Lung	NA	Yes	Adult_Cortex:Fetal_Cortex	2.115e-09	rs2403193	94
ENSG00000156414	TDRD9	14	104394799	104519004	1	protein_coding	122402	TDRD9	3.82299e-07	NA	0	0	65	7.8833e-62	0	eQTLGen_cis_eQTLs:GTEx/v8/Whole_Blood:GTEx/v8/Artery_Tibial	NA	Yes	Adult_Cortex:Fetal_Cortex	1.851e-11	rs2403193	94
ENSG00000066735	KIF26A	14	104605060	104647231	1	protein_coding	26153	KIF26A	0.410904	NA	0	0	25	9.1197e-21	0	eQTLGen_cis_eQTLs:GTEx/v8/Brain_Caudate_basal_ganglia	NA	No	NA	3.016e-05	rs2403193	94
ENSG00000171262	FAM98B	15	38746328	38779911	1	protein_coding	283742	FAM98B	0.394827	0.363388	0	0	5	1.61156e-06	0.0080578	eQTLcatalogue/TwinsUK_ge_LCL:GTEx/v8/Skin_Sun_Exposed_Lower_leg	NA	Yes	Left_Ventricle:GM12878:IMR90:Mesenchymal_Stem_Cell:Mesendoderm:Trophoblast-like_Cell:hESC	4.142e-08	rs56059718	96
ENSG00000172575	RASGRP1	15	38780304	38857776	-1	protein_coding	10125	RASGRP1	0.189677	-0.7689	15	9.266	23	6.47849e-104	0	EyeGEx:eQTLcatalogue/Fairfax_2012_B-cell_CD19:eQTLcatalogue/GENCORD_ge_LCL:eQTLcatalogue/GEUVADIS_ge_LCL:eQTLcatalogue/TwinsUK_ge_LCL:eQTLcatalogue/TwinsUK_ge_skin:eQTLGen_cis_eQTLs:BIOSQTL/BIOS_eQTL_geneLevel:GTEx/v8/Cells_EBV-transformed_lymphocytes:GTEx/v8/Esophagus_Mucosa:GTEx/v8/Heart_Atrial_Appendage:GTEx/v8/Skin_Not_Sun_Exposed_Suprapubic:GTEx/v8/Skin_Sun_Exposed_Lower_leg:GTEx/v8/Spleen:G…	NA	Yes	Adult_Cortex:Fetal_Cortex:Aorta:Left_Ventricle:Liver:GM12878:IMR90:Mesenchymal_Stem_Cell:Mesendoderm:Trophoblast-like_Cell:hESC	4.142e-08	rs56059718	96
ENSG00000175779	C15orf53	15	38988799	38992239	1	protein_coding	400359	C15orf53	0.0936098	1.02773	0	0	4	4.744e-06	0.0137523	eQTLGen_cis_eQTLs	NA	Yes	Promoter_anchored_loops:Aorta:Left_Ventricle:Liver:Spleen:GM12878:IMR90:Mesenchymal_Stem_Cell:Mesendoderm:Neural_Progenitor_Cell:Trophoblast-like_Cell:hESC	4.142e-08	rs56059718	96
ENSG00000136371	MTHFS	15	80125927	80189721	-1	protein_coding	10588	MTHFS	0.0406511	NA	0	0	1	3.0179e-06	0.0216888	eQTLGen_trans_eQTLs	NA	No	NA	0.03871	rs13054099	109
ENSG00000122390	NAA60	16	3493611	3536963	1	protein_coding	79903	NAA60	0.908883	0.828474	0	0	1	1.7935e-06	0.013966	eQTLGen_trans_eQTLs	NA	No	NA	0.03871	rs13054099	109
ENSG00000237515	SHISA9	16	12995477	13334272	1	protein_coding	729993	SHISA9	NA	NA	93	11.99	82	1.96105e-11	4.80831e-07	TIGER/Nom_Alonso_Pancreatic_islets:Nom_InsPIRE_Islets_Gene_eQTLs_Nominal_Pvalues:GTEx/v8/Pancreas:GTEx/v8/Pituitary:GTEx/v7/Pancreas:GTEx/v7/Pituitary:GTEx/v6/Pancreas	NA	Yes	Aorta:Left_Ventricle:Liver:IMR90:Mesenchymal_Stem_Cell:Mesendoderm:Neural_Progenitor_Cell:Trophoblast-like_Cell:hESC	4.326e-09	rs4781375;rs12926421:rs4781375	97:98
ENSG00000103365	GGA2	16	23474863	23533316	-1	protein_coding	23062	GGA2	5.0465e-05	-1.64901	0	0	1	3.4093e-08	0.000448625	eQTLGen_trans_eQTLs	NA	No	NA	1.391e-05	rs9074	107
ENSG00000103479	RBL2	16	53467889	53525561	1	protein_coding	5934	RBL2	0.957797	-0.466961	0	0	1	5.0825e-08	0.000694541	eQTLGen_trans_eQTLs	NA	No	NA	0.02339	rs301806	1
ENSG00000157349	DDX19B	16	70323566	70369186	1	protein_coding	11269	DDX19B	0.0357118	-0.91354	0	0	4	1.114e-19	0	eQTLGen_trans_eQTLs	NA	No	NA	1.527e-07	rs13054099;rs5751069	109
ENSG00000103043	VAC14	16	70721342	70835064	-1	protein_coding	55697	VAC14	0.6297	-0.188845	1	8.251	0	NA	NA	NA	NA	Yes	Promoter_anchored_loops:Left_Ventricle:IMR90:Mesenchymal_Stem_Cell:Mesendoderm:Trophoblast-like_Cell:hESC	1.143e-09	rs184474340;rs12917983:rs184474340:rs2070939;rs12917983:rs2070939:rs184474340;rs57852066:rs139350162;rs57852066	99
ENSG00000157423	HYDIN	16	70841281	71264625	-1	protein_coding	101930373	HYDIN	NA	-0.249721	2	1.307	0	NA	NA	NA	NA	Yes	Promoter_anchored_loops:Mesendoderm:hESC	9.74e-07	rs184474340;rs12917983:rs184474340:rs2070939	99
ENSG00000180917	CMTR2	16	71315292	71323618	-1	protein_coding	55783	CMTR2	1.42416e-07	-0.54122	1	5.25	82	3.9244e-34	0	PsychENCODE_eQTLs:eQTLGen_cis_eQTLs:GTEx/v8/Esophagus_Gastroesophageal_Junction:GTEx/v8/Testis:GTEx/v8/Thyroid	NA	Yes	IMR90:Mesenchymal_Stem_Cell:Mesendoderm:Trophoblast-like_Cell:hESC	3.518e-09	rs184474340;rs2070939;rs12917983;rs184474340:rs2070939:rs184474340;rs57852066:rs12917983:rs139350162;rs57852066	99
ENSG00000172137	CALB2	16	71392616	71424341	1	protein_coding	794	CALB2	0.0012389	-0.281638	1	4.134	3	1.50667e-07	5.96082e-05	EyeGEx	NA	Yes	Left_Ventricle:Liver:IMR90:Mesenchymal_Stem_Cell:Mesendoderm:Neural_Progenitor_Cell:Trophoblast-like_Cell:hESC	2.144e-09	rs184474340;rs12917983;rs2070939;rs12917983:rs184474340:rs2070939:rs184474340;rs57852066:rs139350162;rs57852066	99
ENSG00000167377	ZNF23	16	71481500	71496998	-1	protein_coding	7571	ZNF23	8.37283e-07	-0.580456	4	2.466	107	8.3772e-33	0	EyeGEx:eQTLcatalogue/Kasela_2017_T-cell_CD8:eQTLGen_cis_eQTLs:BIOSQTL/BIOS_eQTL_geneLevel:CMC_SVA_cis:GTEx/v8/Adipose_Subcutaneous:GTEx/v8/Adipose_Visceral_Omentum:GTEx/v8/Artery_Aorta:GTEx/v8/Artery_Tibial:GTEx/v8/Brain_Caudate_basal_ganglia:GTEx/v8/Colon_Sigmoid:GTEx/v8/Colon_Transverse:GTEx/v8/Esophagus_Gastroesophageal_Junction:GTEx/v8/Esophagus_Mucosa:GTEx/v8/Heart_Atrial_Appendage:GTEx/v8/L…	NA	Yes	Aorta:Left_Ventricle:Liver:GM12878:IMR90:Mesenchymal_Stem_Cell:Mesendoderm:Trophoblast-like_Cell:hESC	1.143e-09	rs12917983;rs184474340;rs2070939;rs12917983:rs184474340:rs57852066:rs2070939:rs139350162;rs57852066:rs184474340;rs57852066:rs77701645:rs139350162;rs57852066:rs151071492:rs139350162;rs184474340:rs139350162	99
ENSG00000261611	AC010547.9	16	71481503	71523214	-1	protein_coding	7571	NA	NA	NA	4	2.466	12	4.0464e-13	0	EyeGEx:BIOSQTL/BIOS_eQTL_geneLevel	NA	Yes	Promoter_anchored_loops:Fetal_Cortex:Left_Ventricle:GM12878:IMR90:Mesenchymal_Stem_Cell:Mesendoderm:Trophoblast-like_Cell:hESC	2.561e-08	rs12917983;rs184474340;rs2070939;rs12917983:rs184474340	99
ENSG00000157429	ZNF19	16	71498453	71598992	-1	protein_coding	7567	ZNF19	1.78277e-05	-0.369655	9	7.534	170	2.8608e-12	0	eQTLGen_cis_eQTLs:BIOSQTL/BIOS_eQTL_geneLevel:GTEx/v8/Adipose_Subcutaneous:GTEx/v8/Adrenal_Gland:GTEx/v8/Artery_Aorta:GTEx/v8/Artery_Tibial:GTEx/v8/Brain_Cortex:GTEx/v8/Esophagus_Muscularis:GTEx/v8/Muscle_Skeletal:GTEx/v8/Nerve_Tibial:GTEx/v8/Cells_Cultured_fibroblasts:GTEx/v8/Skin_Not_Sun_Exposed_Suprapubic:GTEx/v8/Skin_Sun_Exposed_Lower_leg:GTEx/v8/Stomach:GTEx/v8/Testis:GTEx/v8/Thyroid:GTEx/v7…	NA	Yes	Adult_Cortex:Fetal_Cortex:Aorta:Left_Ventricle:Liver:GM12878:IMR90:Mesenchymal_Stem_Cell:Mesendoderm:Trophoblast-like_Cell:hESC	1.198e-09	rs12917983;rs184474340;rs2070939;rs12917983:rs2070939:rs184474340:rs139350162;rs57852066:rs184474340;rs57852066:rs151071492:rs77701645:rs139350162;rs184474340:rs139350162:rs57852066	99
ENSG00000140835	CHST4	16	71559136	71572649	1	protein_coding	10164	CHST4	5.59232e-09	-0.0369774	3	4.927	3	1.57154e-05	0.00397234	GTEx/v8/Adrenal_Gland	NA	Yes	Left_Ventricle:GM12878:IMR90:Mesenchymal_Stem_Cell:Mesendoderm:Trophoblast-like_Cell:hESC	2.561e-08	rs12917983;rs184474340:rs12917983	99
ENSG00000198650	TAT	16	71599563	71611033	-1	protein_coding	6898	TAT	0.0214384	-0.357662	4	5.377	86	1.93805e-86	0	TIGER/Nom_Alonso_Pancreatic_islets:EyeGEx:PsychENCODE_eQTLs:DICE/B_cell_naive:BIOSQTL/BIOS_eQTL_geneLevel:GTEx/v8/Brain_Nucleus_accumbens_basal_ganglia:GTEx/v8/Nerve_Tibial:GTEx/v8/Prostate:GTEx/v8/Testis:GTEx/v7/Brain_Nucleus_accumbens_basal_ganglia:GTEx/v7/Testis:GTEx/v6/Testis	NA	Yes	Aorta:Left_Ventricle:Liver:GM12878:IMR90:Mesenchymal_Stem_Cell:Mesendoderm:Trophoblast-like_Cell:hESC	1.143e-09	rs12917983;rs184474340;rs2070939;rs12917983:rs184474340:rs2070939:rs139350162;rs57852066:rs151071492:rs184474340;rs57852066	99
ENSG00000140832	MARVELD3	16	71660064	71676017	1	protein_coding	91862	MARVELD3	0.000303794	0.0575293	5	27.3	177	7.14834e-33	0	TIGER/Nom_Alonso_Pancreatic_islets:Nom_InsPIRE_Islets_Gene_eQTLs_Nominal_Pvalues:eQTLcatalogue/CEDAR_ileum:eQTLcatalogue/CEDAR_transverse_colon:PsychENCODE_eQTLs:BIOSQTL/BIOS_eQTL_geneLevel:GTEx/v8/Adipose_Subcutaneous:GTEx/v8/Adipose_Visceral_Omentum:GTEx/v8/Cells_EBV-transformed_lymphocytes:GTEx/v8/Artery_Aorta:GTEx/v8/Artery_Coronary:GTEx/v8/Artery_Tibial:GTEx/v8/Brain_Cerebellar_Hemisphere:GT…	NA	Yes	Promoter_anchored_loops:Liver:GM12878:IMR90:Mesenchymal_Stem_Cell:Mesendoderm:Trophoblast-like_Cell:hESC	1.143e-09	rs12917983;rs2070939;rs184474340;rs12917983:rs2070939;rs12917983:rs184474340:rs2070939:rs184474340;rs57852066:rs139350162;rs57852066	99
ENSG00000040199	PHLPP2	16	71671738	71758604	-1	protein_coding	23035	PHLPP2	0.0157973	-0.244889	17	27.3	223	8.3817e-56	0	EyeGEx:eQTLcatalogue/BrainSeq_ge_brain:eQTLcatalogue/Fairfax_2014_IFN24:eQTLcatalogue/Fairfax_2014_naive:eQTLcatalogue/GENCORD_ge_fibroblast:eQTLcatalogue/GEUVADIS_ge_LCL:eQTLcatalogue/Lepik_2017_ge_blood:eQTLcatalogue/Quach_2016_ge_monocyte_IAV:eQTLcatalogue/TwinsUK_ge_LCL:eQTLcatalogue/TwinsUK_ge_skin:PsychENCODE_eQTLs:DICE/Monocyte_classical:DICE/Monocyte_non_classical:eQTLGen_cis_eQTLs:BIOSQT…	NA	Yes	Promoter_anchored_loops:Mesenchymal_Stem_Cell:Mesendoderm:hESC	1.173e-09	rs12917983;rs184474340;rs2070939	99
ENSG00000166747	AP1G1	16	71762913	71843104	-1	protein_coding	164	AP1G1	0.999976	-1.06285	16	11.56	218	4.84699e-63	0	EyeGEx:eQTLcatalogue/BLUEPRINT_ge_T-cell:eQTLcatalogue/CEDAR_platelet:eQTLcatalogue/Fairfax_2014_IFN24:eQTLGen_cis_eQTLs:BIOSQTL/BIOS_eQTL_geneLevel:xQTLServer_eQTLs:CMC_SVA_cis:GTEx/v8/Adipose_Subcutaneous:GTEx/v8/Adrenal_Gland:GTEx/v8/Artery_Aorta:GTEx/v8/Artery_Tibial:GTEx/v8/Brain_Cortex:GTEx/v8/Brain_Hippocampus:GTEx/v8/Brain_Putamen_basal_ganglia:GTEx/v8/Breast_Mammary_Tissue:GTEx/v8/Esopha…	NA	Yes	Adult_Cortex:Fetal_Cortex:GM12878:IMR90:Mesenchymal_Stem_Cell:hESC	1.143e-09	rs184474340;rs12917983;rs2070939;rs12917983:rs184474340:rs77701645:rs139350162;rs57852066:rs57852066:rs2070939:rs139350162;rs57852066	99
ENSG00000224470	ATXN1L	16	71879894	71919171	1	protein_coding	342371	ATXN1L	NA	-2.03957	19	19.81	142	4.69711e-09	2.34856e-05	eQTLcatalogue/BLUEPRINT_ge_monocyte:eQTLcatalogue/HipSci_ge_iPSC:eQTLGen_cis_eQTLs:BRAINEAC/HIPP:GTEx/v8/Artery_Tibial:GTEx/v8/Skin_Sun_Exposed_Lower_leg:GTEx/v8/Testis:GTEx/v7/Artery_Tibial:GTEx/v7/Testis	NA	Yes	Adult_Cortex:Fetal_Cortex:Left_Ventricle:Liver:GM12878:IMR90:Mesenchymal_Stem_Cell:Mesendoderm:Trophoblast-like_Cell:hESC	1.143e-09	rs12917983;rs184474340;rs2070939;rs12917983:rs2070939:rs184474340:rs2070939;rs12917983:rs77701645:rs139350162;rs57852066:rs57852066:rs184474340;rs57852066:rs139350162;rs57852066:rs151071492	99
ENSG00000182149	IST1	16	71879899	71962913	1	protein_coding	9798	IST1	0.0231107	0.00939117	42	19.81	218	3.1335e-37	0	TIGER/Nom_Alonso_Pancreatic_islets:EyeGEx:eQTLcatalogue/Alasoo_2018_ge_macrophage_IFNg_Salmonella:eQTLcatalogue/Alasoo_2018_ge_macrophage_IFNg:eQTLcatalogue/BLUEPRINT_ge_monocyte:eQTLcatalogue/BLUEPRINT_ge_T-cell:eQTLcatalogue/Fairfax_2014_IFN24:eQTLcatalogue/GEUVADIS_ge_LCL:eQTLcatalogue/HipSci_ge_iPSC:eQTLcatalogue/Kasela_2017_T-cell_CD4:eQTLcatalogue/Quach_2016_ge_monocyte_R848:eQTLcatalogue/T…	NA	Yes	Adult_Cortex:Fetal_Cortex:Left_Ventricle:Liver:GM12878:IMR90:Mesenchymal_Stem_Cell:Mesendoderm:Trophoblast-like_Cell:hESC	1.143e-09	rs12917983;rs184474340;rs2070939;rs12917983:rs2070939:rs184474340:rs2070939;rs12917983:rs77701645:rs139350162;rs57852066:rs57852066:rs184474340;rs57852066:rs139350162;rs57852066:rs151071492	99
ENSG00000102984	ZNF821	16	71893583	71929239	-1	protein_coding	55565	ZNF821	0.158431	NA	18	19.81	116	4.12008e-12	0	BIOSQTL/BIOS_eQTL_geneLevel:GTEx/v8/Muscle_Skeletal	NA	Yes	Adult_Cortex:Fetal_Cortex:Left_Ventricle:Liver:GM12878:IMR90:Mesenchymal_Stem_Cell:Mesendoderm:Trophoblast-like_Cell:hESC	1.143e-09	rs12917983;rs184474340;rs2070939;rs2070939:rs12917983:rs184474340:rs2070939;rs12917983:rs184474340;rs57852066:rs139350162;rs57852066:rs75070471:rs57852066	99
ENSG00000102967	DHODH	16	72042487	72058954	1	protein_coding	1723	DHODH	0.0128239	0.964115	29	13.07	181	1.13394e-37	0	TIGER/Nom_Alonso_Pancreatic_islets:EyeGEx:eQTLcatalogue/Alasoo_2018_ge_macrophage_Salmonella:eQTLcatalogue/BLUEPRINT_ge_monocyte:eQTLcatalogue/BrainSeq_ge_brain:eQTLcatalogue/GENCORD_ge_fibroblast:eQTLcatalogue/Nedelec_2016_ge_macrophage_Listeria:eQTLcatalogue/Nedelec_2016_ge_macrophage_naive:eQTLcatalogue/TwinsUK_ge_fat:eQTLcatalogue/TwinsUK_ge_skin:PsychENCODE_eQTLs:eQTLGen_cis_eQTLs:BIOSQTL/BI…	NA	Yes	Liver:GM12878:IMR90:Mesenchymal_Stem_Cell:Mesendoderm:hESC	2.144e-09	rs2070939;rs139350162;rs184474340;rs57852066;rs12917983;rs151071492;rs12917983:rs184474340:rs2070939:rs184474340;rs57852066:rs139350162;rs57852066:rs77701645:rs139350162;rs57852066:rs57852066:rs139350162;rs184474340:rs139350162:rs2070939	99
ENSG00000140830	TXNL4B	16	72078188	72128330	-1	protein_coding	54957	TXNL4B	0.0173065	-0.594229	70	21.4	180	1.3006e-27	0	eQTLcatalogue/BrainSeq_ge_brain:eQTLcatalogue/Lepik_2017_ge_blood:PsychENCODE_eQTLs:eQTLGen_cis_eQTLs:BIOSQTL/BIOS_eQTL_geneLevel:CMC_SVA_cis:GTEx/v8/Adipose_Subcutaneous:GTEx/v8/Whole_Blood:GTEx/v8/Artery_Aorta:GTEx/v8/Artery_Tibial:GTEx/v8/Brain_Caudate_basal_ganglia:GTEx/v8/Brain_Cortex:GTEx/v8/Brain_Nucleus_accumbens_basal_ganglia:GTEx/v8/Brain_Putamen_basal_ganglia:GTEx/v8/Breast_Mammary_Tis…	NA	Yes	Fetal_Cortex:Left_Ventricle:Liver:GM12878:IMR90:Mesenchymal_Stem_Cell:Mesendoderm:Trophoblast-like_Cell:hESC	5.219e-10	rs2070939;rs12917983;rs184474340;rs57852066;rs139350162;rs75070471;rs75070471:rs77701645:rs57852066:rs2070939:rs139350162;rs57852066:rs12917983:rs151071492:rs184474340;rs57852066:rs139350162;rs184474340:rs139350162:rs139350162;rs57852066:rs184474340	99
ENSG00000257017	HP	16	72088491	72094954	1	protein_coding	3240	HP	0.0293907	1.0442	27	10.24	334	3.27170000000001e-310	0	EyeGEx:eQTLcatalogue/BLUEPRINT_ge_monocyte:eQTLcatalogue/BLUEPRINT_ge_neutrophil:eQTLcatalogue/CEDAR_monocyte_CD14:eQTLcatalogue/CEDAR_neutrophil_CD15:eQTLcatalogue/Fairfax_2014_naive:eQTLcatalogue/Lepik_2017_ge_blood:eQTLcatalogue/TwinsUK_ge_blood:eQTLcatalogue/TwinsUK_ge_fat:PsychENCODE_eQTLs:DICE/Monocyte_classical:eQTLGen_cis_eQTLs:BIOSQTL/BIOS_eQTL_geneLevel:GTEx/v8/Adipose_Subcutaneous:GTEx…	NA	Yes	Left_Ventricle:Liver:IMR90:Mesenchymal_Stem_Cell:Mesendoderm:Trophoblast-like_Cell:hESC	5.219e-10	rs2070939;rs12917983;rs184474340;rs57852066;rs139350162;rs151071492;rs77701645;rs75070471;rs77701645:rs139350162;rs57852066:rs57852066:rs12917983:rs184474340:rs2070939:rs139350162;rs57852066:rs151071492:rs184474340;rs57852066:rs2070939;rs12917983:rs139350162:rs139350162;rs184474340:rs75070471	99
ENSG00000261701	HPR	16	72088522	72111145	1	protein_coding	3250	HPR	2.94872e-07	-0.259845	38	10.24	209	0	0	EyeGEx:eQTLcatalogue/BrainSeq_ge_brain:PsychENCODE_eQTLs:BIOSQTL/BIOS_eQTL_geneLevel:xQTLServer_eQTLs:CMC_SVA_cis:CMC_NoSVA_cis:BRAINEAC/CRBL:BRAINEAC/FCTX:BRAINEAC/HIPP:BRAINEAC/MEDU:BRAINEAC/OCTX:BRAINEAC/PUTM:BRAINEAC/SNIG:BRAINEAC/THAL:BRAINEAC/WHMT:BRAINEAC/aveALL:GTEx/v8/Adipose_Subcutaneous:GTEx/v8/Adipose_Visceral_Omentum:GTEx/v8/Whole_Blood:GTEx/v8/Artery_Aorta:GTEx/v8/Artery_Tibial:GTEx…	NA	Yes	Left_Ventricle:Liver:IMR90:Mesenchymal_Stem_Cell:Mesendoderm:Trophoblast-like_Cell:hESC	5.219e-10	rs2070939;rs12917983;rs184474340;rs57852066;rs139350162;rs75070471;rs77701645:rs139350162;rs57852066:rs57852066:rs12917983:rs184474340:rs2070939:rs139350162;rs57852066:rs151071492:rs184474340;rs57852066:rs2070939;rs12917983:rs139350162:rs139350162;rs184474340:rs75070471	99
ENSG00000140829	DHX38	16	72127461	72146811	1	protein_coding	9785	DHX38	1.03801e-06	0.106969	44	21.4	210	1.6191e-141	0	TIGER/Nom_Alonso_Pancreatic_islets:eQTLcatalogue/BLUEPRINT_ge_monocyte:eQTLcatalogue/BLUEPRINT_ge_neutrophil:eQTLcatalogue/BLUEPRINT_ge_T-cell:eQTLcatalogue/CEDAR_T-cell_CD4:eQTLcatalogue/Fairfax_2012_B-cell_CD19:eQTLcatalogue/Fairfax_2014_IFN24:eQTLcatalogue/Fairfax_2014_LPS24:eQTLcatalogue/Fairfax_2014_LPS2:eQTLcatalogue/Fairfax_2014_naive:eQTLcatalogue/GEUVADIS_ge_LCL:eQTLcatalogue/Nedelec_201…	NA	Yes	Fetal_Cortex:Left_Ventricle:Liver:GM12878:IMR90:Mesenchymal_Stem_Cell:Mesendoderm:Trophoblast-like_Cell:hESC	5.219e-10	rs2070939;rs139350162;rs184474340;rs57852066;rs12917983;rs75070471:rs77701645:rs57852066:rs2070939:rs139350162;rs57852066:rs12917983:rs151071492:rs184474340;rs57852066:rs139350162;rs184474340:rs139350162:rs139350162;rs57852066:rs184474340	99
ENSG00000118557	PMFBP1	16	72146056	72210777	-1	protein_coding	83449	PMFBP1	NA	-0.0123066	64	25	223	2.60372e-19	1.30186e-15	EyeGEx:eQTLcatalogue/Alasoo_2018_ge_macrophage_naive:eQTLcatalogue/BrainSeq_ge_brain:eQTLcatalogue/Fairfax_2014_IFN24:eQTLcatalogue/Fairfax_2014_LPS24:eQTLcatalogue/Fairfax_2014_LPS2:BIOSQTL/BIOS_eQTL_geneLevel:GTEx/v8/Brain_Cortex:GTEx/v8/Colon_Transverse:GTEx/v8/Esophagus_Mucosa:GTEx/v8/Skin_Not_Sun_Exposed_Suprapubic:GTEx/v8/Testis:GTEx/v8/Thyroid:GTEx/v7/Colon_Transverse:GTEx/v7/Esophagus_Muc…	NA	Yes	Aorta:Left_Ventricle:Liver:Pancreas:Right_Ventricle:Spleen:GM12878:IMR90:Mesenchymal_Stem_Cell:Mesendoderm:Neural_Progenitor_Cell:Trophoblast-like_Cell:hESC	5.219e-10	rs2070939;rs184474340;rs57852066;rs151071492;rs12917983;rs2070939:rs151071492:rs139350162;rs57852066:rs77701645:rs139350162;rs57852066:rs57852066:rs139350162:rs75070471:rs139350162;rs184474340:rs184474340;rs57852066:rs12917983	99
ENSG00000140836	ZFHX3	16	72816784	73093597	-1	protein_coding	463	ZFHX3	1	-0.743235	66	19.27	16	3.27562e-05	0.02589	CMC_NoSVA_cis:GTEx/v8/Esophagus_Mucosa	NA	Yes	Aorta:Left_Ventricle:Liver:GM12878:IMR90:Mesenchymal_Stem_Cell:Mesendoderm:Neural_Progenitor_Cell:Trophoblast-like_Cell:hESC	5.219e-10	rs77701645;rs139350162;rs184474340;rs57852066;rs75070471;rs2070939;rs77701645:rs139350162;rs57852066:rs57852066:rs2070939:rs139350162;rs57852066:rs12917983:rs151071492:rs139350162;rs184474340:rs139350162:rs184474340;rs57852066:rs75070471	99
ENSG00000140968	IRF8	16	85932409	85956215	1	protein_coding	3394	IRF8	0.92654	-0.298039	0	0	1	2.0649e-07	0.00202068	eQTLGen_trans_eQTLs	NA	No	NA	0.02339	rs301806	1
ENSG00000108839	ALOX12	17	6899384	6914055	1	protein_coding	239	ALOX12	6.34478e-10	-0.209571	0	0	1	7.0359e-06	0.0435853	eQTLGen_trans_eQTLs	NA	No	NA	4.765e-05	rs10267593	49
ENSG00000181350	FAM211A	17	16344891	16395467	-1	protein_coding	388341	FAM211A	0.732182	NA	0	0	1	3.0952e-06	0.0222482	eQTLGen_trans_eQTLs	NA	No	NA	0.03871	rs13054099	109
ENSG00000132589	FLOT2	17	27206353	27224697	-1	protein_coding	2319	FLOT2	0.0172343	-0.0816753	0	0	1	3.4807e-06	0.0245833	eQTLGen_trans_eQTLs	NA	No	NA	NA	rs7617480;rs62262722	24
ENSG00000161647	MPP3	17	41878167	41910538	-1	protein_coding	4356	MPP3	1.99786e-05	NA	1	6.112	0	NA	NA	NA	NA	Yes	Left_Ventricle:IMR90:Mesenchymal_Stem_Cell:Mesendoderm:Trophoblast-like_Cell	3.179e-09	rs147621919;rs147621919:rs111574702	100
ENSG00000108852	MPP2	17	41952725	41987068	-1	protein_coding	4355	MPP2	0.00258051	0.781071	0	0	4	2.757e-11	0	eQTLGen_trans_eQTLs	NA	Yes	IMR90:Mesenchymal_Stem_Cell	1.527e-07	rs13054099;rs5751069;rs147621919	100:109
ENSG00000091947	TMEM101	17	42088556	42101314	-1	protein_coding	84336	TMEM101	0.161636	-0.333977	1	9.203	0	NA	NA	NA	NA	Yes	Fetal_Cortex:IMR90:Mesenchymal_Stem_Cell:Mesendoderm:Trophoblast-like_Cell	3.179e-09	rs147621919;rs111574702:rs147621919	100
ENSG00000161654	LSM12	17	42112003	42144987	-1	protein_coding	124801	LSM12	0.931682	-1.27818	0	0	13	4.32715e-05	0.0145321	GTEx/v8/Lung	NA	Yes	Promoter_anchored_loops:Left_Ventricle:Liver:Spleen:GM12878:IMR90:Mesenchymal_Stem_Cell:Mesendoderm:Trophoblast-like_Cell:hESC	1.885e-05	rs111574702;rs147621919:rs111574702	100
ENSG00000108840	HDAC5	17	42154114	42201070	-1	protein_coding	10014	HDAC5	0.999808	-0.0806212	1	2.52	0	NA	NA	NA	NA	No	NA	1.885e-05	rs147621919	100
ENSG00000180340	FZD2	17	42634925	42636907	1	protein_coding	2535	FZD2	NA	NA	1	4.203	1	2.1036e-09	1.95695e-05	eQTLGen_cis_eQTLs	NA	Yes	Fetal_Cortex:Aorta:Left_Ventricle:Liver:GM12878:IMR90:Mesenchymal_Stem_Cell:Mesendoderm:Neural_Progenitor_Cell:Trophoblast-like_Cell:hESC	3.179e-09	rs111574702;rs147621919;rs111574702:rs147621919	100
ENSG00000180336	C17orf104	17	42733762	42767676	1	protein_coding	284071	C17orf104	0.978536	0.492103	16	14.43	0	NA	NA	NA	NA	Yes	Left_Ventricle:Liver:GM12878:IMR90:Mesenchymal_Stem_Cell:Mesendoderm:Neural_Progenitor_Cell:Trophoblast-like_Cell:hESC	3.179e-09	rs147621919;rs111574702;rs111574702:rs147621919	100
ENSG00000180329	CCDC43	17	42750437	42767147	-1	protein_coding	124808	CCDC43	0.000257178	-0.924708	9	14.43	0	NA	NA	NA	NA	Yes	Adult_Cortex:Fetal_Cortex:Left_Ventricle:GM12878:IMR90:Mesenchymal_Stem_Cell:Mesendoderm:Trophoblast-like_Cell:hESC	3.179e-09	rs111574702;rs111574702:rs147621919	100
ENSG00000161692	DBF4B	17	42785976	42829632	1	protein_coding	80174	DBF4B	4.43214e-08	-0.507761	5	2.487	6	2.7387e-22	0	EyeGEx:eQTLcatalogue/Lepik_2017_ge_blood:eQTLGen_cis_eQTLs:GTEx/v8/Adipose_Visceral_Omentum:GTEx/v8/Whole_Blood:GTEx/v8/Artery_Aorta:GTEx/v8/Artery_Tibial:GTEx/v8/Brain_Cortex:GTEx/v8/Colon_Transverse:GTEx/v8/Esophagus_Mucosa:GTEx/v8/Esophagus_Muscularis:GTEx/v8/Heart_Atrial_Appendage:GTEx/v8/Heart_Left_Ventricle:GTEx/v8/Lung:GTEx/v8/Nerve_Tibial:GTEx/v8/Skin_Not_Sun_Exposed_Suprapubic:GTEx/v8/Sk…	NA	Yes	Left_Ventricle:GM12878:IMR90:Mesenchymal_Stem_Cell:Mesendoderm:Trophoblast-like_Cell:hESC	3.179e-09	rs111574702;rs147621919;rs147621919:rs111574702	100
ENSG00000073670	ADAM11	17	42836399	42859214	1	protein_coding	4185	ADAM11	0.0247364	0.499905	12	4.513	2	2.63215e-05	8.88745e-57	GTEx/v8/Nerve_Tibial	NA	Yes	Adult_Cortex:IMR90:Mesenchymal_Stem_Cell:Mesendoderm	0.003032	rs111574702;rs147621919;rs111574702:rs147621919	100
ENSG00000182963	GJC1	17	42875816	42908184	-1	protein_coding	10052	GJC1	0.944105	-2.78299	13	8.497	1	9.42903e-08	6.20148e-64	eQTLcatalogue/GEUVADIS_ge_LCL:GTEx/v8/Cells_Cultured_fibroblasts	NA	Yes	Fetal_Cortex	0.003032	rs111574702;rs147621919;rs111574702:rs147621919	100
ENSG00000131097	HIGD1B	17	42923721	42927848	1	protein_coding	51751	HIGD1B	0.00234558	-0.344883	7	9.677	0	NA	NA	NA	NA	Yes	Promoter_anchored_loops:Fetal_Cortex:Left_Ventricle:GM12878:IMR90:Mesenchymal_Stem_Cell:Mesendoderm:hESC	3.179e-09	rs111574702;rs111574702:rs147621919	100
ENSG00000108883	EFTUD2	17	42927311	42977030	-1	protein_coding	9343	EFTUD2	0.999991	0.211209	27	11.11	2	2.967e-11	0	eQTLGen_cis_eQTLs:GTEx/v8/Artery_Aorta:GTEx/v8/Colon_Sigmoid	NA	Yes	Adult_Cortex:Fetal_Cortex:IMR90:Mesenchymal_Stem_Cell	2.093e-08	rs111574702;rs147621919;rs111574702:rs147621919	100
ENSG00000167131	CCDC103	17	42976510	42982758	1	protein_coding	388389	CCDC103	0.00218552	3.73457e-05	12	11.11	0	NA	NA	NA	NA	Yes	Adult_Cortex:Fetal_Cortex:IMR90:Mesenchymal_Stem_Cell	2.093e-08	rs111574702;rs111574702:rs147621919	100
ENSG00000214447	FAM187A	17	42977135	42982758	1	protein_coding	388389	FAM187A	NA	NA	12	11.11	0	NA	NA	NA	NA	Yes	Adult_Cortex:Fetal_Cortex:IMR90:Mesenchymal_Stem_Cell	2.093e-08	rs111574702;rs111574702:rs147621919	100
ENSG00000131095	GFAP	17	42982376	42994305	-1	protein_coding	2670	GFAP	2.22937e-05	-0.265503	7	6.613	0	NA	NA	NA	NA	Yes	Adult_Cortex:Fetal_Cortex:IMR90:Mesenchymal_Stem_Cell	2.093e-08	rs111574702;rs111574702:rs147621919	100
ENSG00000186185	KIF18B	17	43002077	43025082	-1	protein_coding	146909	KIF18B	8.30837e-05	-0.301213	10	15.05	0	NA	NA	NA	NA	No	NA	NA	rs111574702	100
ENSG00000131094	C1QL1	17	43037061	43045439	-1	protein_coding	10882	C1QL1	NA	NA	2	14.5	0	NA	NA	NA	NA	Yes	Promoter_anchored_loops:IMR90:Mesenchymal_Stem_Cell	2.093e-08	rs111574702;rs147621919;rs111574702:rs147621919	100
ENSG00000172992	DCAKD	17	43100708	43138473	-1	protein_coding	79877	DCAKD	0.0293861	0.848595	1	0.198	0	NA	NA	NA	NA	No	NA	0.003032	rs147621919	100
ENSG00000136448	NMT1	17	43128978	43186384	1	protein_coding	4836	NMT1	0.998501	0.0324477	3	1.788	0	NA	NA	NA	NA	No	NA	0.003032	rs147621919	100
ENSG00000161714	PLCD3	17	43186335	43210721	-1	protein_coding	113026	PLCD3	0.000143297	NA	1	1.788	0	NA	NA	NA	NA	Yes	Promoter_anchored_loops	NA	rs147621919	100
ENSG00000181513	ACBD4	17	43209967	43221548	1	protein_coding	79777	ACBD4	1.82643e-05	-0.326407	0	0	3	0.000205618	2.53243e-07	GTEx/v8/Artery_Tibial	NA	Yes	Promoter_anchored_loops	NA	rs111574702;rs147621919	100
ENSG00000159314	ARHGAP27	17	43471275	43511787	-1	protein_coding	201176	ARHGAP27	0.00125584	-0.761628	0	0	4	4.2407e-15	0	eQTLGen_cis_eQTLs	NA	Yes	Promoter_anchored_loops	3.179e-09	rs147621919;rs111574702	100
ENSG00000186868	MAPT	17	43971748	44105700	1	protein_coding	4137	MAPT	4.68265e-05	2.01024	0	0	1	8.86267e-06	0.0443133	eQTLcatalogue/CEDAR_T-cell_CD4	NA	Yes	Fetal_Cortex	2.093e-08	rs147621919;rs111574702	100
ENSG00000007312	CD79B	17	62006100	62009714	-1	protein_coding	974	CD79B	0.950003	0.195857	0	0	1	2.9476e-12	0	eQTLGen_trans_eQTLs	NA	No	NA	1.391e-05	rs9074	107
ENSG00000154217	PITPNC1	17	65373575	65693372	1	protein_coding	26207	PITPNC1	0.967499	NA	0	0	2	2.4856e-09	7.35565e-05	eQTLGen_trans_eQTLs	NA	No	NA	0.0007836	rs13054099;rs5751069	109
ENSG00000125398	SOX9	17	70117161	70122561	1	protein_coding	6662	SOX9	0.98354	-0.473297	0	0	1	4.8454e-10	0.0292936	xQTLServer_eQTLs	NA	No	NA	0.0001598	rs3756334	37
ENSG00000154040	CABYR	18	21718942	21741567	1	protein_coding	26256	CABYR	0.000210501	0.358483	0	0	1	1.5291e-06	0.0119026	eQTLGen_trans_eQTLs	NA	No	NA	1.391e-05	rs9074	107
ENSG00000170558	CDH2	18	25530930	25757410	-1	protein_coding	1000	CDH2	0.897441	-0.139326	0	0	2	7.1167e-08	0.000887216	eQTLGen_trans_eQTLs	NA	No	NA	0.0007836	rs13054099;rs5751069	109
ENSG00000166960	CCDC178	18	30517366	31021065	-1	protein_coding	374864	CCDC178	4.11143e-29	-0.366634	0	0	1	0.000157678	1.00994e-40	GTEx/v8/Testis	NA	Yes	Aorta:Left_Ventricle:Liver:IMR90:Mesenchymal_Stem_Cell:Mesendoderm:Neural_Progenitor_Cell:Trophoblast-like_Cell:hESC	2.554e-09	rs11081827	101
ENSG00000141431	ASXL3	18	31158579	31331156	1	protein_coding	80816	ASXL3	0.999977	-1.64461	30	12.73	9	6.89075e-06	0.00998784	GTEx/v8/Colon_Transverse	NA	Yes	Adult_Cortex:Fetal_Cortex:Left_Ventricle:Liver:Right_Ventricle:IMR90:Mesenchymal_Stem_Cell:Mesendoderm:Trophoblast-like_Cell:hESC	2.554e-09	rs11081827	101
ENSG00000101746	NOL4	18	31431064	31804916	-1	protein_coding	8715	NOL4	0.998788	-1.08546	2	0.673	0	NA	NA	NA	NA	Yes	Fetal_Cortex:Liver:IMR90:Mesenchymal_Stem_Cell:Mesendoderm:Neural_Progenitor_Cell:Trophoblast-like_Cell:hESC	1.728e-08	rs11081827	101
ENSG00000134775	FHOD3	18	33877677	34360018	1	protein_coding	80206	FHOD3	0.997517	NA	0	0	1	NA	0.049	CMC_SVA_cis	NA	No	NA	0.0029	rs11665070	102
ENSG00000150477	KIAA1328	18	34409069	34812135	1	protein_coding	57536	KIAA1328	6.07254e-05	-0.427349	1	0.556	3	4.76593e-05	0.0249108	GTEx/v7/Adipose_Subcutaneous	NA	Yes	IMR90:Mesenchymal_Stem_Cell:Mesendoderm:hESC	2.76e-07	rs11665070;rs62081464	102
ENSG00000101489	CELF4	18	34823010	35146000	-1	protein_coding	56853	CELF4	0.974365	1.3888	63	22.4	0	NA	NA	NA	NA	Yes	Spleen	1.593e-16	rs11665070;rs62081464;rs35064785;rs11665070:rs62081464	102
ENSG00000187323	DCC	18	49866542	51057784	1	protein_coding	1630	DCC	0.999999	-0.23995	407	18.56	227	8.03492e-13	2.2398e-38	PsychENCODE_eQTLs:CMC_SVA_cis:CMC_NoSVA_cis:GTEx/v8/Adrenal_Gland:GTEx/v8/Brain_Cerebellum:GTEx/v8/Nerve_Tibial:GTEx/v8/Testis:GTEx/v7/Adrenal_Gland:GTEx/v7/Brain_Cerebellum:GTEx/v7/Nerve_Tibial	NA	Yes	Mesendoderm:Trophoblast-like_Cell:hESC	1.088e-12	rs8091083;rs11663393;rs8092490;rs8091083:rs11663393:rs8092490:rs11663393	103
ENSG00000134046	MBD2	18	51679079	51751158	-1	protein_coding	8932	MBD2	0.98931	-0.581558	0	0	50	2.8292e-11	0	eQTLGen_cis_eQTLs:GTEx/v8/Esophagus_Mucosa:GTEx/v8/Thyroid	NA	Yes	GM12878:Mesenchymal_Stem_Cell:Mesendoderm:hESC	5.461e-09	rs1833303;rs35349559;rs1348047;rs1942262:rs12967143:rs1348047:rs12967143;rs1348047:rs9964176:rs11663393:rs11663393;rs8091083:rs8092490	103:104
ENSG00000101751	POLI	18	51795774	51847636	1	protein_coding	11201	POLI	4.26967e-09	-0.857624	0	0	73	7.5897e-78	0	TIGER/Nom_Alonso_Pancreatic_islets:EyeGEx:eQTLcatalogue/BLUEPRINT_ge_monocyte:eQTLcatalogue/BLUEPRINT_ge_neutrophil:eQTLcatalogue/BLUEPRINT_ge_T-cell:eQTLcatalogue/GENCORD_ge_fibroblast:eQTLcatalogue/Lepik_2017_ge_blood:eQTLcatalogue/TwinsUK_ge_LCL:PsychENCODE_eQTLs:eQTLGen_cis_eQTLs:CMC_SVA_cis:GTEx/v8/Adipose_Subcutaneous:GTEx/v8/Adipose_Visceral_Omentum:GTEx/v8/Whole_Blood:GTEx/v8/Artery_Aorta…	NA	Yes	GM12878:Mesendoderm:hESC	1.674e-08	rs1833303;rs35349559;rs139088385;rs1942262:rs1348047;rs1942262:rs12967143:rs12967143;rs1942262:rs1261070:rs1348047:rs12967143;rs1348047:rs11663393:rs8092490:rs11663393;rs8091083:rs9964176	103:104
ENSG00000174448	STARD6	18	51850728	51884334	-1	protein_coding	147323	STARD6	0.0263352	0.538902	0	0	18	4.42492e-06	2.47163e-10	PsychENCODE_eQTLs:GTEx/v8/Nerve_Tibial	NA	Yes	Adult_Cortex:Fetal_Cortex:Left_Ventricle:GM12878:IMR90:Mesenchymal_Stem_Cell:Mesendoderm:Trophoblast-like_Cell:hESC	1.362e-15	rs1833303;rs12967143:rs12967143;rs1348047:rs12969473:rs1261070:rs1833303:rs1348047;rs1942262:rs1348047:rs11663393:rs11663393;rs8091083:rs9964176:rs35349559:rs1942262:rs139088385;rs1261070:rs9964176;rs35349559:rs139088385:rs12967143;rs1942262:rs2924329;rs1261070:rs1452787:rs8092490	103:104
ENSG00000166845	C18orf54	18	51884287	51911588	1	protein_coding	162681	C18orf54	6.01292e-06	-0.183059	0	0	19	2.94081e-06	1.32548e-12	PsychENCODE_eQTLs:eQTLGen_cis_eQTLs:GTEx/v8/Whole_Blood:GTEx/v8/Heart_Atrial_Appendage:GTEx/v7/Heart_Atrial_Appendage:GTEx/v7/Testis	NA	Yes	Adult_Cortex:Fetal_Cortex:Left_Ventricle:GM12878:IMR90:Mesenchymal_Stem_Cell:Mesendoderm:Trophoblast-like_Cell:hESC	1.362e-15	rs9964176;rs1833303;rs12967143:rs12967143;rs1348047:rs12969473:rs1261070:rs1833303:rs1348047;rs1942262:rs1348047:rs11663393:rs11663393;rs8091083:rs9964176:rs35349559:rs1942262:rs139088385;rs1261070:rs9964176;rs35349559:rs139088385:rs12967143;rs1942262:rs2924329;rs1261070:rs1452787:rs8092490	103:104
ENSG00000178690	DYNAP	18	52254988	52266724	1	protein_coding	284254	DYNAP	0.409403	-0.315177	4	5.042	67	3.12938e-23	7.58213e-18	GTEx/v8/Esophagus_Mucosa:GTEx/v7/Esophagus_Mucosa:GTEx/v6/Esophagus_Mucosa	NA	Yes	Mesenchymal_Stem_Cell	8.485e-10	rs1833303;rs9964176:rs9964176;rs35349559:rs35349559:rs139088385:rs1942262:rs139088385;rs1261070:rs1261070	104
ENSG00000041353	RAB27B	18	52385091	52562747	1	protein_coding	5874	RAB27B	0.6873	-0.304479	54	9.766	82	1.02636e-45	0	EyeGEx:eQTLcatalogue/Alasoo_2018_ge_macrophage_IFNg_Salmonella:eQTLcatalogue/BLUEPRINT_ge_T-cell:eQTLcatalogue/CEDAR_monocyte_CD14:PsychENCODE_eQTLs:DICE/T_CD4_naive_TREG:eQTLGen_cis_eQTLs:BIOSQTL/BIOS_eQTL_geneLevel:CMC_SVA_cis:BRAINEAC/PUTM:GTEx/v8/Brain_Cerebellum:GTEx/v8/Brain_Cortex:GTEx/v8/Nerve_Tibial:GTEx/v8/Skin_Not_Sun_Exposed_Suprapubic:GTEx/v8/Skin_Sun_Exposed_Lower_leg:GTEx/v8/Testis…	NA	Yes	Fetal_Cortex:Left_Ventricle:IMR90:Mesenchymal_Stem_Cell:Mesendoderm:hESC	1.362e-15	rs1833303;rs9964176;rs1452787;rs139088385;rs1261070;rs12967143;rs1348047;rs35349559;rs1833303:rs139088385:rs35349559:rs9964176:rs9964176;rs35349559:rs1942262:rs139088385;rs1261070:rs1261070:rs2924329;rs1261070:rs12967143;rs1348047:rs12967143	104
ENSG00000166510	CCDC68	18	52568740	52626739	-1	protein_coding	80323	CCDC68	6.41318e-07	-0.943594	0	0	43	5.08112e-07	3.5444e-19	EyeGEx:PsychENCODE_eQTLs:DICE/T_CD4_TH2:CMC_SVA_cis:GTEx/v8/Esophagus_Mucosa:GTEx/v8/Liver:GTEx/v8/Cells_Cultured_fibroblasts:GTEx/v8/Thyroid:GTEx/v6/Ovary	NA	Yes	Liver:IMR90:Mesenchymal_Stem_Cell:Mesendoderm:Trophoblast-like_Cell:hESC	5.066e-15	rs1348047;rs12967143;rs35349559;rs9964176;rs139088385;rs1261070;rs1833303;rs1833303:rs35349559:rs1942262:rs139088385;rs1261070:rs9964176:rs1261070:rs11663393:rs8092490:rs11663393;rs8091083	103:104
ENSG00000196628	TCF4	18	52889562	53332018	-1	protein_coding	6925	TCF4	0.999867	0.443466	182	22	97	1.1836e-23	0	eQTLcatalogue/Fairfax_2014_LPS24:PsychENCODE_eQTLs:eQTLGen_cis_eQTLs:BIOSQTL/BIOS_eQTL_geneLevel:GTEx/v8/Esophagus_Mucosa:GTEx/v8/Skin_Sun_Exposed_Lower_leg:GTEx/v7/Esophagus_Mucosa:GTEx/v7/Skin_Sun_Exposed_Lower_leg	NA	Yes	Left_Ventricle:IMR90:Mesenchymal_Stem_Cell:Mesendoderm:hESC	1.362e-15	rs1942262;rs12967143;rs1348047;rs1261070;rs2924329;rs1452787;rs12969473;rs9964176;rs35349559;rs35349559:rs1942262:rs139088385;rs1261070:rs2924329;rs1261070:rs12967143;rs1348047:rs12967143:rs1261070:rs1348047;rs1942262:rs12967143;rs1942262:rs1348047:rs1452787:rs12969473	104
ENSG00000091157	WDR7	18	54318574	54698828	1	protein_coding	23335	WDR7	1	1.04316	0	0	11	1.56194e-05	0.00210077	GTEx/v8/Esophagus_Mucosa	NA	Yes	Adult_Cortex:Fetal_Cortex:Aorta:Left_Ventricle:Right_Ventricle:GM12878:IMR90:Mesenchymal_Stem_Cell:Mesendoderm:Neural_Progenitor_Cell:Trophoblast-like_Cell:hESC	1.362e-15	rs1452787;rs1942262:rs12967143;rs1942262:rs1348047;rs1942262:rs1261070:rs12967143:rs1348047:rs12967143;rs1348047:rs2924329;rs1261070:rs12969473:rs1833303:rs139088385:rs9964176:rs9964176;rs35349559:rs35349559:rs1452787:rs139088385;rs1261070:rs12967143;rs2924329:rs2924329:rs1348047	104
ENSG00000198796	ALPK2	18	56148479	56296189	-1	protein_coding	115701	ALPK2	3.56147e-13	0.76477	0	0	2	3.7783e-07	0.00339656	eQTLGen_trans_eQTLs	NA	No	NA	0.0007836	rs13054099;rs5751069	109
ENSG00000060069	CTDP1	18	77439801	77514510	1	protein_coding	9150	CTDP1	0.924155	-0.131002	0	0	8	2.8062e-11	0	eQTLGen_cis_eQTLs:BIOSQTL/BIOS_eQTL_geneLevel	NA	No	NA	6.051e-09	rs11664298	105
ENSG00000178342	KCNG2	18	77623668	77660184	1	protein_coding	26251	KCNG2	0.00583162	NA	0	0	13	7.26182e-42	0	eQTLGen_cis_eQTLs:BIOSQTL/BIOS_eQTL_geneLevel:GTEx/v8/Adipose_Subcutaneous:GTEx/v8/Adipose_Visceral_Omentum:GTEx/v8/Whole_Blood:GTEx/v8/Brain_Caudate_basal_ganglia:GTEx/v8/Lung:GTEx/v8/Cells_Cultured_fibroblasts:GTEx/v8/Spleen:GTEx/v7/Whole_Blood:GTEx/v7/Spleen:GTEx/v6/Whole_Blood	NA	Yes	Spleen:IMR90:Mesenchymal_Stem_Cell:Mesendoderm:hESC	6.051e-09	rs11664298	105
ENSG00000122490	PQLC1	18	77662420	77711664	-1	protein_coding	80148	PQLC1	0.000252469	-0.0711085	0	0	15	5.5754e-131	0	EyeGEx:eQTLcatalogue/BLUEPRINT_ge_neutrophil:eQTLcatalogue/CEDAR_neutrophil_CD15:eQTLcatalogue/Fairfax_2014_naive:eQTLcatalogue/Naranbhai_2015_neutrophil_CD16:eQTLGen_cis_eQTLs:BIOSQTL/BIOS_eQTL_geneLevel:GTEx/v8/Brain_Cerebellar_Hemisphere:GTEx/v8/Colon_Sigmoid:GTEx/v8/Colon_Transverse:GTEx/v8/Lung:GTEx/v8/Nerve_Tibial:GTEx/v8/Prostate:GTEx/v8/Thyroid:GTEx/v7/Nerve_Tibial:GTEx/v7/Thyroid	NA	No	NA	6.051e-09	rs11664298	105
ENSG00000226742	HSBP1L1	18	77724561	77730822	1	protein_coding	440498	HSBP1L1	NA	NA	0	0	13	1.4339e-31	0	eQTLcatalogue/BLUEPRINT_ge_neutrophil:eQTLcatalogue/Lepik_2017_ge_blood:eQTLGen_cis_eQTLs:BIOSQTL/BIOS_eQTL_geneLevel:GTEx/v8/Whole_Blood:GTEx/v8/Muscle_Skeletal:GTEx/v7/Whole_Blood	NA	No	NA	6.051e-09	rs11664298	105
ENSG00000141759	TXNL4A	18	77732867	77793949	-1	protein_coding	10907	TXNL4A	0.00154674	NA	0	0	11	6.60244e-14	1.38394e-88	eQTLcatalogue/BLUEPRINT_ge_neutrophil:GTEx/v8/Muscle_Skeletal:GTEx/v8/Cells_Cultured_fibroblasts:GTEx/v7/Breast_Mammary_Tissue	NA	Yes	IMR90	6.051e-09	rs11664298	105
ENSG00000267127	RP11-795F19.5	18	77794346	77854968	1	protein_coding	NA	NA	NA	NA	0	0	2	1.6355e-05	0.0106589	BIOSQTL/BIOS_eQTL_geneLevel	NA	Yes	IMR90	6.051e-09	rs11664298	105
ENSG00000101546	RBFA	18	77794358	77806397	1	protein_coding	79863	RBFA	0.000358068	NA	0	0	6	2.9346e-07	6.37729e-13	eQTLGen_cis_eQTLs:BIOSQTL/BIOS_eQTL_geneLevel:GTEx/v8/Esophagus_Muscularis	NA	Yes	IMR90	6.051e-09	rs11664298	105
ENSG00000101544	ADNP2	18	77866915	77905406	1	protein_coding	22850	ADNP2	0.346938	-0.264846	0	0	7	1.472e-08	7.04586e-05	eQTLGen_cis_eQTLs	NA	Yes	IMR90	6.051e-09	rs11664298	105
ENSG00000267270	AC139100.2	18	77905807	77936315	1	protein_coding	NA	NA	NA	NA	0	0	12	1.66489e-09	1.59989e-33	GTEx/v8/Adipose_Subcutaneous:GTEx/v8/Cells_Cultured_fibroblasts:GTEx/v8/Testis:GTEx/v7/Adipose_Subcutaneous	NA	No	NA	6.051e-09	rs11664298	105
ENSG00000104921	FCER2	19	7753644	7767032	-1	protein_coding	2208	FCER2	1.50208e-09	-0.208315	0	0	1	7.0631e-27	0	eQTLGen_trans_eQTLs	NA	No	NA	1.391e-05	rs9074	107
ENSG00000198521	ZNF43	19	21987752	22034927	-1	protein_coding	7594	ZNF43	2.14784e-08	0.35247	0	0	1	3.3712e-06	0.0238488	eQTLGen_trans_eQTLs	NA	No	NA	0.02339	rs301806	1
ENSG00000168661	ZNF30	19	35417807	35436074	1	protein_coding	90075	ZNF30	8.05997e-09	0.708653	0	0	1	3.6957e-07	0.00336097	eQTLGen_trans_eQTLs	NA	No	NA	0.03871	rs13054099	109
ENSG00000089351	GRAMD1A	19	35485688	35517375	1	protein_coding	57655	GRAMD1A	0.568381	NA	0	0	3	1.8594e-08	0.000246875	eQTLGen_trans_eQTLs	NA	No	NA	1.527e-07	rs13054099;rs5751069	109
ENSG00000012124	CD22	19	35810164	35838258	1	protein_coding	933	CD22	0.0308499	0.50401	0	0	1	4.9786e-17	0	eQTLGen_trans_eQTLs	NA	No	NA	1.391e-05	rs9074	107
ENSG00000105369	CD79A	19	42381190	42385439	1	protein_coding	973	CD79A	0.948568	-0.557347	0	0	2	1.0343e-08	0.00016239	eQTLGen_trans_eQTLs	NA	No	NA	1.391e-05	rs301806;rs9074	0.115972
ENSG00000170604	IRF2BP1	19	46386866	46389376	-1	protein_coding	26145	IRF2BP1	0.97443	NA	0	0	1	7.4155e-06	0.0454359	eQTLGen_trans_eQTLs	NA	No	NA	0.03871	rs13054099	109
ENSG00000167414	GNG8	19	47137333	47137942	-1	protein_coding	94235	GNG8	0.147001	NA	0	0	1	7.634e-06	0.0466232	eQTLGen_trans_eQTLs	NA	No	NA	0.0007836	rs5751069	109
ENSG00000142235	LMTK3	19	48988528	49016446	-1	protein_coding	114783	LMTK3	NA	NA	0	0	3	5.3255e-07	0.00470352	eQTLGen_trans_eQTLs	NA	No	NA	1.527e-07	rs13054099;rs5751069	109
ENSG00000104805	NUCB1	19	49403307	49426629	1	protein_coding	4924	NUCB1	4.16611e-05	0.543033	0	0	2	3.8304e-07	0.0012005	eQTLGen_cis_eQTLs	NA	No	NA	NA	rs118155392	106
ENSG00000130529	TRPM4	19	49660998	49715093	1	protein_coding	54795	TRPM4	6.36302e-19	-0.0930365	0	0	1	1.69965e-06	1.1598e-23	GTEx/v8/Pancreas:GTEx/v8/Cells_Cultured_fibroblasts:GTEx/v6/Cells_Transformed_fibroblasts	NA	No	NA	0.03697	rs118155392	106
ENSG00000261949	GFY	19	49927006	49932075	1	protein_coding	100507003	GFY	NA	NA	1	15.25	0	NA	NA	NA	NA	No	NA	NA	rs118155392	106
ENSG00000104888	SLC17A7	19	49932658	49945617	-1	protein_coding	57030	SLC17A7	0.995933	-0.421074	1	15.25	1	9.36727e-05	0.0335912	BRAINEAC/THAL	NA	Yes	EP_correlation_cell_type_oneway	NA	rs118155392	106
ENSG00000104872	PIH1D1	19	49949555	49956754	-1	protein_coding	55011	PIH1D1	0.0879513	0.323376	4	15.25	3	5.7788e-12	0	eQTLGen_cis_eQTLs:BIOSQTL/BIOS_eQTL_geneLevel:GTEx/v8/Skin_Sun_Exposed_Lower_leg:GTEx/v8/Testis	NA	No	NA	3.66e-08	rs118155392	106
ENSG00000161618	ALDH16A1	19	49956426	49974305	1	protein_coding	126133	ALDH16A1	1.35195e-07	0.132279	3	3.121	4	1.2298e-25	0	PsychENCODE_eQTLs:eQTLGen_cis_eQTLs:BIOSQTL/BIOS_eQTL_geneLevel:GTEx/v8/Whole_Blood:GTEx/v8/Artery_Aorta:GTEx/v8/Brain_Cerebellum:GTEx/v8/Brain_Cortex:GTEx/v8/Esophagus_Mucosa:GTEx/v8/Muscle_Skeletal:GTEx/v8/Cells_Cultured_fibroblasts:GTEx/v8/Skin_Sun_Exposed_Lower_leg:GTEx/v8/Thyroid:GTEx/v7/Esophagus_Mucosa:GTEx/v7/Muscle_Skeletal:GTEx/v6/Artery_Tibial:GTEx/v6/Esophagus_Mucosa:GTEx/v6/Muscle_Sk…	NA	No	NA	3.66e-08	rs118155392	106
ENSG00000269469	CTD-3148I10.9	19	49966009	49989488	1	protein_coding	NA	NA	NA	NA	3	3.121	1	3.4819e-11	0	BIOSQTL/BIOS_eQTL_geneLevel	NA	No	NA	3.66e-08	rs118155392	106
ENSG00000142541	RPL13A	19	49990811	49995565	1	protein_coding	26819	RPL13A	0.633828	0.703415	0	0	8	4.3617e-112	0	eQTLcatalogue/Fairfax_2012_B-cell_CD19:eQTLcatalogue/Fairfax_2014_IFN24:eQTLcatalogue/Fairfax_2014_naive:eQTLcatalogue/Kasela_2017_T-cell_CD4:eQTLGen_cis_eQTLs:GTEx/v8/Pancreas	NA	No	NA	3.66e-08	rs118155392	106
ENSG00000104870	FCGRT	19	50010073	50029590	1	protein_coding	2217	FCGRT	0.825587	-0.63053	0	0	4	1.2321e-06	2.41362e-14	eQTLGen_cis_eQTLs:GTEx/v8/Skin_Not_Sun_Exposed_Suprapubic	NA	Yes	IMR90:Mesenchymal_Stem_Cell	NA	rs118155392	106
ENSG00000142546	NOSIP	19	50058968	50093519	-1	protein_coding	51070	NOSIP	0.00230157	-0.458735	4	21.5	5	1.78212e-09	3.04255e-27	GTEx/v8/Skin_Not_Sun_Exposed_Suprapubic:GTEx/v8/Skin_Sun_Exposed_Lower_leg	NA	No	NA	0.03697	rs118155392	106
ENSG00000126460	PRRG2	19	50083903	50094272	1	protein_coding	5639	PRRG2	5.96506e-05	-0.0307732	3	21.5	5	6.31469e-07	3.24235e-27	eQTLcatalogue/TwinsUK_ge_skin:eQTLGen_cis_eQTLs:GTEx/v8/Skin_Not_Sun_Exposed_Suprapubic:GTEx/v8/Thyroid:GTEx/v7/Skin_Not_Sun_Exposed_Suprapubic	NA	No	NA	0.03697	rs118155392	106
ENSG00000126464	PRR12	19	50094900	50129696	1	protein_coding	57479	PRR12	0.99997	NA	3	21.5	5	1.64589e-48	4.56803e-60	eQTLcatalogue/TwinsUK_ge_skin:eQTLGen_cis_eQTLs:GTEx/v8/Adipose_Visceral_Omentum:GTEx/v8/Whole_Blood:GTEx/v8/Brain_Cortex:GTEx/v8/Breast_Mammary_Tissue:GTEx/v8/Colon_Transverse:GTEx/v8/Esophagus_Mucosa:GTEx/v8/Liver:GTEx/v8/Lung:GTEx/v8/Nerve_Tibial:GTEx/v8/Pancreas:GTEx/v8/Pituitary:GTEx/v8/Prostate:GTEx/v8/Minor_Salivary_Gland:GTEx/v8/Cells_Cultured_fibroblasts:GTEx/v8/Skin_Not_Sun_Exposed_Supr…	NA	No	NA	0.03697	rs118155392	106
ENSG00000126461	SCAF1	19	50145382	50161899	1	protein_coding	58506	SCAF1	0.998788	NA	1	3.253	0	NA	NA	NA	NA	Yes	Adult_Cortex:Mesenchymal_Stem_Cell	0.03697	rs118155392	106
ENSG00000126456	IRF3	19	50162826	50169132	-1	protein_coding	3661	IRF3	0.00321742	NA	1	3.253	1	3.6013e-17	0	eQTLGen_cis_eQTLs	NA	No	NA	0.03697	rs118155392	106
ENSG00000126453	BCL2L12	19	50168823	50177173	1	protein_coding	83596	BCL2L12	1.55699e-05	0.449267	1	3.253	0	NA	NA	NA	NA	No	NA	0.03697	rs118155392	106
ENSG00000126467	TSKS	19	50243010	50266587	-1	protein_coding	60385	TSKS	0.980814	-0.204732	0	0	3	7.6588e-09	4.51176e-05	eQTLGen_cis_eQTLs	NA	No	NA	0.03697	rs118155392	106
ENSG00000104973	MED25	19	50321539	50342073	1	protein_coding	102465480	MED25	0.00112988	0.222965	0	0	1	6.65534e-05	2.29177e-12	GTEx/v8/Skin_Sun_Exposed_Lower_leg	NA	No	NA	NA	rs118155392	106
ENSG00000204070	SYS1	20	43990577	44005438	1	protein_coding	90196	SYS1	0.474141	0.395083	0	0	5	5.2236e-06	0.0150183	eQTLGen_cis_eQTLs	NA	No	NA	0.0003305	rs9074	107
ENSG00000124116	WFDC3	20	44376583	44420571	-1	protein_coding	140686	WFDC3	0.0192375	-0.0384674	0	0	8	1.9631e-10	0	eQTLGen_cis_eQTLs:GTEx/v8/Cells_Cultured_fibroblasts	NA	No	NA	0.0003305	rs9074	107
ENSG00000101457	DNTTIP1	20	44420576	44440066	1	protein_coding	116092	DNTTIP1	0.431437	-0.603615	0	0	12	2.4366e-19	0	eQTLGen_cis_eQTLs	NA	No	NA	4.852e-08	rs9074	107
ENSG00000101470	TNNC2	20	44451853	44462384	-1	protein_coding	7125	TNNC2	0.54715	0.277456	0	0	9	1.0378e-12	0	eQTLGen_cis_eQTLs	NA	No	NA	0.0003305	rs9074	107
ENSG00000124104	SNX21	20	44462449	44471914	1	protein_coding	90203	SNX21	0.020814	-0.352848	0	0	8	5.2686e-08	0.000734174	eQTLGen_cis_eQTLs:eQTLGen_trans_eQTLs	NA	No	NA	0.0003305	rs9074;rs13054099;rs5751069	107:109
ENSG00000149634	SPATA25	20	44515128	44516274	-1	protein_coding	128497	SPATA25	0.000413851	0.469864	0	0	2	1.97215e-06	2.17781e-06	GTEx/v8/Adipose_Subcutaneous:GTEx/v8/Adipose_Visceral_Omentum	NA	Yes	Adult_Cortex:Fetal_Cortex	4.852e-08	rs9074	107
ENSG00000124257	NEURL2	20	44517264	44519926	-1	protein_coding	140825	NEURL2	0.00262021	-0.17182	0	0	2	5.40045e-06	6.61485e-13	GTEx/v8/Adipose_Subcutaneous:GTEx/v8/Adipose_Visceral_Omentum:GTEx/v8/Muscle_Skeletal:GTEx/v7/Adipose_Visceral_Omentum	NA	Yes	Adult_Cortex:Fetal_Cortex	4.852e-08	rs9074	107
ENSG00000064601	CTSA	20	44518783	44527459	1	protein_coding	5476	CTSA	4.23468e-05	-0.321842	0	0	4	3.6625e-08	0.000152352	eQTLGen_cis_eQTLs	NA	Yes	Adult_Cortex:Fetal_Cortex	4.852e-08	rs9074	107
ENSG00000100979	PLTP	20	44527399	44540794	-1	protein_coding	5360	PLTP	0.000142042	-0.314791	0	0	16	8.2756e-40	0	eQTLcatalogue/Fairfax_2014_IFN24:PsychENCODE_eQTLs:eQTLGen_cis_eQTLs:BIOSQTL/BIOS_eQTL_geneLevel:GTEx/v8/Artery_Tibial:GTEx/v8/Colon_Sigmoid:GTEx/v8/Esophagus_Muscularis:GTEx/v8/Lung:GTEx/v8/Cells_Cultured_fibroblasts:GTEx/v7/Adipose_Subcutaneous	NA	Yes	Fetal_Cortex	4.852e-08	rs9074	107
ENSG00000198026	ZNF335	20	44577292	44600833	-1	protein_coding	63925	ZNF335	0.006503	-0.437242	0	0	1	9.08205e-06	2.52673e-06	GTEx/v8/Skin_Not_Sun_Exposed_Suprapubic	NA	No	NA	0.0112	rs9074	107
ENSG00000100985	MMP9	20	44637547	44645200	1	protein_coding	4318	MMP9	2.7877e-08	0.142851	0	0	4	2.8896e-08	1.91181e-08	eQTLGen_cis_eQTLs:GTEx/v8/Cells_Cultured_fibroblasts:GTEx/v8/Skin_Sun_Exposed_Lower_leg	NA	No	NA	4.367e-05	rs9074	107
ENSG00000124140	SLC12A5	20	44650356	44688784	1	protein_coding	57468	SLC12A5	0.999987	-1.07818	4	21.5	13	0	0	TIGER/Nom_Alonso_Pancreatic_islets:PsychENCODE_eQTLs:BIOSQTL/BIOS_eQTL_geneLevel:xQTLServer_eQTLs:GTEx/v8/Adipose_Subcutaneous:GTEx/v8/Adipose_Visceral_Omentum:GTEx/v8/Adrenal_Gland:GTEx/v8/Brain_Caudate_basal_ganglia:GTEx/v8/Brain_Hippocampus:GTEx/v8/Brain_Putamen_basal_ganglia:GTEx/v8/Lung:GTEx/v8/Spleen:GTEx/v7/Adipose_Visceral_Omentum	NA	Yes	Promoter_anchored_loops:Adult_Cortex:Fetal_Cortex:Spleen:IMR90:Mesendoderm:hESC	4.852e-08	rs9074	107
ENSG00000124160	NCOA5	20	44689624	44718591	-1	protein_coding	57727	NCOA5	0.9968	-0.349365	6	21.5	3	1.7764e-12	0	eQTLGen_cis_eQTLs:BIOSQTL/BIOS_eQTL_geneLevel	NA	Yes	Adult_Cortex:Fetal_Cortex:Spleen:GM12878:IMR90:Mesendoderm:Trophoblast-like_Cell:hESC	4.852e-08	rs9074	107
ENSG00000101017	CD40	20	44746911	44758502	1	protein_coding	958	CD40	0.658238	-0.0149088	9	6.95	20	2.0177e-222	0	EyeGEx:eQTLcatalogue/BLUEPRINT_ge_monocyte:eQTLcatalogue/CEDAR_monocyte_CD14:eQTLcatalogue/Fairfax_2014_LPS24:eQTLcatalogue/Fairfax_2014_LPS2:eQTLcatalogue/Fairfax_2014_naive:eQTLcatalogue/HipSci_ge_iPSC:eQTLcatalogue/Quach_2016_ge_monocyte_LPS:eQTLcatalogue/TwinsUK_ge_fat:PsychENCODE_eQTLs:DICE/B_cell_naive:eQTLGen_cis_eQTLs:BIOSQTL/BIOS_eQTL_geneLevel:CMC_SVA_cis:GTEx/v8/Adipose_Subcutaneous:GT…	NA	Yes	Adult_Cortex	4.852e-08	rs9074	107
ENSG00000124126	PREX1	20	47240790	47444420	-1	protein_coding	57580	PREX1	1	0.286576	0	0	133	3.37311e-13	8.84379e-20	GTEx/v8/Muscle_Skeletal:GTEx/v8/Cells_Cultured_fibroblasts:GTEx/v7/Muscle_Skeletal:GTEx/v6/Muscle_Skeletal	NA	Yes	EP_correlation_cell_type_oneway:Adult_Cortex	3.027e-10	rs6012575	108
ENSG00000124198	ARFGEF2	20	47538427	47653230	1	protein_coding	10564	ARFGEF2	1	-0.733705	78	18.94	221	2.2099e-62	0	TIGER/Nom_Alonso_Pancreatic_islets:EyeGEx:eQTLcatalogue/BLUEPRINT_ge_monocyte:eQTLcatalogue/Fairfax_2014_IFN24:eQTLcatalogue/HipSci_ge_iPSC:PsychENCODE_eQTLs:DICE/T_CD8_naive:eQTLGen_cis_eQTLs:BIOSQTL/BIOS_eQTL_geneLevel:CMC_SVA_cis:CMC_NoSVA_cis:GTEx/v8/Adipose_Subcutaneous:GTEx/v8/Whole_Blood:GTEx/v8/Breast_Mammary_Tissue:GTEx/v8/Colon_Sigmoid:GTEx/v8/Colon_Transverse:GTEx/v8/Esophagus_Muscular…	NA	No	NA	3.027e-10	rs6012575	108
ENSG00000124207	CSE1L	20	47662849	47713489	1	protein_coding	1434	CSE1L	0.999982	0.526895	67	14.04	229	2.7327e-220	0	TIGER/Nom_Alonso_Pancreatic_islets:Nom_InsPIRE_Islets_Gene_eQTLs_Nominal_Pvalues:EyeGEx:eQTLcatalogue/BLUEPRINT_ge_monocyte:eQTLcatalogue/BLUEPRINT_ge_neutrophil:eQTLcatalogue/CEDAR_ileum:eQTLcatalogue/CEDAR_monocyte_CD14:eQTLcatalogue/Fairfax_2014_IFN24:eQTLcatalogue/Fairfax_2014_LPS24:eQTLcatalogue/Fairfax_2014_LPS2:eQTLcatalogue/Fairfax_2014_naive:eQTLcatalogue/Lepik_2017_ge_blood:eQTLcatalogu…	NA	Yes	Adult_Cortex:Fetal_Cortex:Liver:GM12878:IMR90:Mesenchymal_Stem_Cell:Mesendoderm:Trophoblast-like_Cell:hESC	3.027e-10	rs6012575	108
ENSG00000124214	STAU1	20	47729878	47804904	-1	protein_coding	6780	STAU1	0.996416	-0.305862	67	14.09	215	7.7205e-28	0	TIGER/Nom_Alonso_Pancreatic_islets:eQTLcatalogue/CEDAR_rectum:eQTLcatalogue/Fairfax_2014_LPS2:eQTLcatalogue/HipSci_ge_iPSC:eQTLcatalogue/Quach_2016_ge_monocyte_IAV:eQTLcatalogue/Quach_2016_ge_monocyte_LPS:eQTLcatalogue/Quach_2016_ge_monocyte_naive:eQTLcatalogue/Quach_2016_ge_monocyte_Pam3CSK4:eQTLcatalogue/Quach_2016_ge_monocyte_R848:eQTLcatalogue/TwinsUK_ge_LCL:eQTLGen_cis_eQTLs:BIOSQTL/BIOS_eQT…	NA	Yes	Promoter_anchored_loops:EP_correlation_cell_type_oneway:EP_correlation_organ_oneway:Adult_Cortex:Fetal_Cortex:Aorta:Left_Ventricle:Liver:Right_Ventricle:GM12878:IMR90:Mesenchymal_Stem_Cell:Mesendoderm:Trophoblast-like_Cell:hESC	3.027e-10	rs6012575	108
ENSG00000124228	DDX27	20	47835884	47860614	1	protein_coding	55661	DDX27	0.25017	-0.391785	11	6.356	168	9.27049e-10	1.98099e-07	PsychENCODE_eQTLs:eQTLGen_cis_eQTLs:CMC_SVA_cis:CMC_NoSVA_cis:GTEx/v8/Adipose_Subcutaneous:GTEx/v8/Esophagus_Mucosa:GTEx/v8/Muscle_Skeletal:GTEx/v8/Nerve_Tibial:GTEx/v8/Cells_Cultured_fibroblasts:GTEx/v7/Esophagus_Mucosa	NA	Yes	Promoter_anchored_loops:Adult_Cortex:Fetal_Cortex:Aorta:Left_Ventricle:Liver:Right_Ventricle:GM12878:IMR90:Mesenchymal_Stem_Cell:Mesendoderm:Trophoblast-like_Cell:hESC	3.027e-10	rs6012575	108
ENSG00000124201	ZNFX1	20	47854483	47894963	-1	protein_coding	57169	ZNFX1	0.999981	-0.288128	15	14.45	195	3.6176e-96	0	EyeGEx:eQTLcatalogue/Fairfax_2014_IFN24:eQTLcatalogue/Fairfax_2014_LPS2:eQTLcatalogue/Lepik_2017_ge_blood:eQTLcatalogue/Quach_2016_ge_monocyte_Pam3CSK4:PsychENCODE_eQTLs:DICE/T_CD4_TFH:eQTLGen_cis_eQTLs:BIOSQTL/BIOS_eQTL_geneLevel:CMC_SVA_cis:GTEx/v8/Whole_Blood:GTEx/v8/Brain_Cortex:GTEx/v8/Thyroid:GTEx/v7/Thyroid	NA	Yes	EP_correlation_cell_type_oneway:Adult_Cortex:Aorta:Liver:GM12878:IMR90:Mesenchymal_Stem_Cell:Mesendoderm:Trophoblast-like_Cell:hESC	3.027e-10	rs6012575	108
ENSG00000158445	KCNB1	20	47980414	48099184	-1	protein_coding	3745	KCNB1	0.982588	-3.11667	1	6.728	125	1.2891e-38	0	eQTLGen_cis_eQTLs:BIOSQTL/BIOS_eQTL_geneLevel	NA	Yes	EP_correlation_cell_type_oneway:Fetal_Cortex:Aorta:Left_Ventricle:Liver:Spleen:GM12878:IMR90:Mesenchymal_Stem_Cell:Mesendoderm:Neural_Progenitor_Cell:Trophoblast-like_Cell:hESC	3.027e-10	rs6012575	108
ENSG00000101126	ADNP	20	49505585	49547958	-1	protein_coding	23394	ADNP	0.998904	0.560593	0	0	2	5.8289e-07	0.00511025	eQTLGen_trans_eQTLs	NA	No	NA	0.0007836	rs13054099;rs5751069	109
ENSG00000160209	PDXK	21	45138975	45182188	1	protein_coding	101928493	PDXK	0.984648	2.33737	0	0	1	8.6987e-07	0.00729639	eQTLGen_trans_eQTLs	NA	No	NA	0.03871	rs13054099	109
ENSG00000128218	VPREB3	22	24094930	24096655	-1	protein_coding	29802	VPREB3	0.0161486	0.397015	0	0	1	8.5622e-09	0.000148662	eQTLGen_trans_eQTLs	NA	No	NA	1.391e-05	rs9074	107
ENSG00000128284	APOL3	22	36536372	36562225	-1	protein_coding	80833	APOL3	2.87222e-05	-0.122283	0	0	2	3.6801e-07	0.00336283	eQTLGen_trans_eQTLs	NA	No	NA	0.0007836	rs13054099;rs5751069	109
ENSG00000239900	ADSL	22	40742507	40786467	1	protein_coding	158	ADSL	0.000212575	-0.459232	0	0	4	1.7405e-08	9.59263e-05	PsychENCODE_eQTLs:eQTLGen_cis_eQTLs	NA	Yes	Adult_Cortex:Fetal_Cortex:Left_Ventricle:Liver:GM12878:IMR90:Mesenchymal_Stem_Cell:Mesendoderm:Trophoblast-like_Cell:hESC	8.159e-10	rs13054099;rs5751069;rs13054099:rs5751069:rs13054099	109
ENSG00000100359	SGSM3	22	40766595	40806293	1	protein_coding	27352	SGSM3	1.00601e-06	-0.227062	0	0	3	6.7668e-06	0.000160704	CMC_SVA_cis:GTEx/v8/Cells_Cultured_fibroblasts:GTEx/v7/Nerve_Tibial	NA	Yes	Adult_Cortex:Fetal_Cortex:Aorta:Left_Ventricle:Liver:GM12878:IMR90:Mesenchymal_Stem_Cell:Mesendoderm:Trophoblast-like_Cell:hESC	8.159e-10	rs13054099;rs13054099:rs13054099;rs5751069:rs5751069	109
ENSG00000196588	MKL1	22	40806285	41032706	-1	protein_coding	57591	MKL1	0.540324	-0.588524	7	10.2	20	1.4685e-17	0	EyeGEx:eQTLGen_cis_eQTLs:BIOSQTL/BIOS_eQTL_geneLevel:GTEx/v8/Thyroid:GTEx/v7/Colon_Transverse	NA	Yes	Aorta:Left_Ventricle:Liver:GM12878:IMR90:Mesenchymal_Stem_Cell:Mesendoderm:Trophoblast-like_Cell:hESC	8.159e-10	rs13054099;rs5751069;rs13054099:rs5751069:rs13054099	109
ENSG00000128285	MCHR1	22	41074754	41078818	1	protein_coding	2847	MCHR1	0.00114839	-0.0810065	1	0.563	100	2.1407e-237	0	EyeGEx:eQTLcatalogue/GENCORD_ge_T-cell:PsychENCODE_eQTLs:DICE/T_CD4_naive:DICE/T_CD4_naive_activated:DICE/T_CD8_naive:DICE/T_CD4_TFH:DICE/T_CD4_TH1:DICE/T_CD4_TH17:DICE/T_CD4_TH1_17:DICE/T_CD4_TH2:DICE/T_CD4_memory_TREG:DICE/T_CD4_naive_TREG:eQTLGen_cis_eQTLs:BIOSQTL/BIOS_eQTL_geneLevel:xQTLServer_eQTLs:CMC_SVA_cis:GTEx/v8/Whole_Blood:GTEx/v8/Brain_Cerebellum:GTEx/v8/Brain_Cortex:GTEx/v8/Cells_Cu…	NA	Yes	Adult_Cortex:Aorta:Left_Ventricle:Liver:Right_Ventricle:GM12878:IMR90:Mesenchymal_Stem_Cell:Mesendoderm:Trophoblast-like_Cell:hESC	8.159e-10	rs13054099;rs5751069;rs13054099:rs13054099;rs5751069:rs5751069	109
ENSG00000100372	SLC25A17	22	41165634	41215403	-1	protein_coding	10478	SLC25A17	0.0241848	-0.779479	7	11.64	368	1.29e-61	0	TIGER/Nom_Alonso_Pancreatic_islets:EyeGEx:eQTLcatalogue/CEDAR_T-cell_CD8:eQTLcatalogue/Quach_2016_ge_monocyte_Pam3CSK4:PsychENCODE_eQTLs:eQTLGen_cis_eQTLs:BIOSQTL/BIOS_eQTL_geneLevel:CMC_SVA_cis:GTEx/v8/Adipose_Subcutaneous:GTEx/v8/Adipose_Visceral_Omentum:GTEx/v8/Brain_Cerebellum:GTEx/v8/Brain_Nucleus_accumbens_basal_ganglia:GTEx/v8/Brain_Putamen_basal_ganglia:GTEx/v8/Esophagus_Mucosa:GTEx/v8/He…	NA	Yes	Adult_Cortex:Fetal_Cortex:Aorta:Left_Ventricle:Liver:GM12878:IMR90:Mesenchymal_Stem_Cell:Mesendoderm:Trophoblast-like_Cell:hESC	8.159e-10	rs13054099;rs5751069;rs13054099:rs5751069:rs13054099	109
ENSG00000100380	ST13	22	41220539	41253026	-1	protein_coding	6767	ST13	0.659424	-1.5853	7	28.9	75	8.3775e-34	0	Nom_InsPIRE_Islets_Gene_eQTLs_Nominal_Pvalues:eQTLcatalogue/Alasoo_2018_ge_macrophage_naive:eQTLGen_cis_eQTLs:BIOSQTL/BIOS_eQTL_geneLevel:GTEx/v8/Adipose_Subcutaneous:GTEx/v8/Artery_Tibial:GTEx/v8/Breast_Mammary_Tissue:GTEx/v8/Colon_Transverse:GTEx/v8/Liver:GTEx/v8/Nerve_Tibial:GTEx/v8/Pancreas:GTEx/v8/Cells_Cultured_fibroblasts:GTEx/v8/Skin_Not_Sun_Exposed_Suprapubic:GTEx/v8/Skin_Sun_Exposed_Low…	NA	Yes	Adult_Cortex:Fetal_Cortex:Aorta:Left_Ventricle:Liver:GM12878:IMR90:Mesenchymal_Stem_Cell:Mesendoderm:Trophoblast-like_Cell:hESC	8.159e-10	rs13054099;rs5751069;rs13054099:rs13054099;rs5751069:rs5751069	109
ENSG00000196236	XPNPEP3	22	41253081	41363838	1	protein_coding	63929	XPNPEP3	8.88349e-06	-0.745194	11	28.9	394	0	0	TIGER/Nom_Alonso_Pancreatic_islets:EyeGEx:eQTLcatalogue/Alasoo_2018_ge_macrophage_IFNg_Salmonella:eQTLcatalogue/Alasoo_2018_ge_macrophage_naive:eQTLcatalogue/Alasoo_2018_ge_macrophage_Salmonella:eQTLcatalogue/BLUEPRINT_ge_monocyte:eQTLcatalogue/BLUEPRINT_ge_T-cell:eQTLcatalogue/Fairfax_2014_LPS24:eQTLcatalogue/HipSci_ge_iPSC:eQTLcatalogue/Lepik_2017_ge_blood:eQTLcatalogue/Nedelec_2016_ge_macropha…	NA	Yes	Adult_Cortex:Fetal_Cortex:Aorta:Left_Ventricle:Liver:GM12878:IMR90:Mesenchymal_Stem_Cell:Mesendoderm:Trophoblast-like_Cell:hESC	8.159e-10	rs13054099;rs5751069;rs13054099:rs13054099;rs5751069:rs5751069	109
ENSG00000172404	DNAJB7	22	41255553	41258130	-1	protein_coding	150353	DNAJB7	2.09351e-11	0.355457	1	28.9	79	3.27167000000001e-310	0	eQTLcatalogue/BrainSeq_ge_brain:BIOSQTL/BIOS_eQTL_geneLevel:GTEx/v8/Thyroid:GTEx/v7/Brain_Cortex	NA	Yes	Adult_Cortex:Fetal_Cortex:Aorta:Left_Ventricle:Liver:GM12878:IMR90:Mesenchymal_Stem_Cell:Mesendoderm:Trophoblast-like_Cell:hESC	8.159e-10	rs13054099;rs5751069;rs13054099:rs13054099;rs5751069:rs5751069	109
ENSG00000100387	RBX1	22	41347351	41369313	1	protein_coding	9978	RBX1	0.940247	-0.356288	4	2.495	24	6.50367e-06	0.00370318	GTEx/v8/Brain_Cerebellar_Hemisphere:GTEx/v8/Nerve_Tibial:GTEx/v8/Cells_Cultured_fibroblasts:GTEx/v8/Skin_Sun_Exposed_Lower_leg:GTEx/v7/Nerve_Tibial	NA	Yes	Promoter_anchored_loops:Adult_Cortex:Fetal_Cortex:Left_Ventricle:Liver:Spleen:GM12878:IMR90:Mesenchymal_Stem_Cell:Mesendoderm:Trophoblast-like_Cell:hESC	1.177e-09	rs13054099;rs5751069:rs13054099:rs5751069	109
ENSG00000100393	EP300	22	41487790	41576081	1	protein_coding	2033	EP300	1	NA	30	18.42	405	3.5099e-167	0	eQTLcatalogue/CEDAR_neutrophil_CD15:eQTLcatalogue/CEDAR_T-cell_CD4:eQTLcatalogue/CEDAR_T-cell_CD8:eQTLcatalogue/CEDAR_transverse_colon:eQTLcatalogue/Fairfax_2012_B-cell_CD19:eQTLcatalogue/Fairfax_2014_naive:eQTLcatalogue/Kasela_2017_T-cell_CD8:PsychENCODE_eQTLs:eQTLGen_cis_eQTLs:BIOSQTL/BIOS_eQTL_geneLevel:GTEx/v8/Adipose_Subcutaneous:GTEx/v8/Artery_Aorta:GTEx/v8/Artery_Tibial:GTEx/v8/Brain_Cereb…	NA	Yes	Promoter_anchored_loops:Adult_Cortex:Left_Ventricle:Liver:Spleen:GM12878:IMR90:Mesenchymal_Stem_Cell:Mesendoderm:Trophoblast-like_Cell:hESC	8.159e-10	rs13054099;rs5751069;rs13054099:rs5751069:rs13054099	109
ENSG00000100395	L3MBTL2	22	41601209	41627275	1	protein_coding	83746	L3MBTL2	0.013028	-0.618259	24	15.1	390	2.0266e-303	0	eQTLcatalogue/Fairfax_2012_B-cell_CD19:eQTLcatalogue/Fairfax_2014_IFN24:eQTLcatalogue/Fairfax_2014_LPS24:eQTLcatalogue/Fairfax_2014_LPS2:eQTLcatalogue/Fairfax_2014_naive:eQTLcatalogue/GENCORD_ge_LCL:eQTLcatalogue/GENCORD_ge_T-cell:eQTLcatalogue/GEUVADIS_ge_LCL:eQTLcatalogue/Kasela_2017_T-cell_CD4:eQTLcatalogue/Kasela_2017_T-cell_CD8:eQTLcatalogue/Quach_2016_ge_monocyte_IAV:eQTLcatalogue/TwinsUK_g…	NA	Yes	EP_links_oneway:Promoter_anchored_loops	8.159e-10	rs5751069;rs13054099;rs5751069:rs13054099	109
ENSG00000100399	CHADL	22	41625517	41636938	-1	protein_coding	150356	CHADL	0.0808135	0.299037	10	8.721	85	3.31344e-14	1.14616e-11	eQTLcatalogue/TwinsUK_ge_fat:PsychENCODE_eQTLs:CMC_SVA_cis:CMC_NoSVA_cis:GTEx/v8/Brain_Caudate_basal_ganglia:GTEx/v8/Brain_Nucleus_accumbens_basal_ganglia:GTEx/v8/Colon_Sigmoid:GTEx/v8/Colon_Transverse:GTEx/v8/Esophagus_Mucosa:GTEx/v8/Nerve_Tibial:GTEx/v8/Skin_Not_Sun_Exposed_Suprapubic:GTEx/v7/Nerve_Tibial:GTEx/v7/Uterus:GTEx/v6/Nerve_Tibial	NA	Yes	Promoter_anchored_loops	1.341e-09	rs5751069;rs13054099;rs13054099:rs13054099	109
ENSG00000100401	RANGAP1	22	41641615	41682255	-1	protein_coding	5905	RANGAP1	0.132719	-0.376522	23	8.721	393	3.5178e-27	0	EyeGEx:PsychENCODE_eQTLs:eQTLGen_cis_eQTLs:BIOSQTL/BIOS_eQTL_geneLevel:CMC_SVA_cis:BRAINEAC/SNIG:GTEx/v8/Whole_Blood:GTEx/v8/Artery_Tibial:GTEx/v8/Brain_Cerebellar_Hemisphere:GTEx/v8/Brain_Cerebellum:GTEx/v8/Brain_Nucleus_accumbens_basal_ganglia:GTEx/v8/Colon_Sigmoid:GTEx/v8/Esophagus_Mucosa:GTEx/v8/Muscle_Skeletal:GTEx/v8/Nerve_Tibial:GTEx/v8/Skin_Sun_Exposed_Lower_leg:GTEx/v7/Esophagus_Mucosa:G…	NA	Yes	Promoter_anchored_loops:IMR90:Mesenchymal_Stem_Cell	8.159e-10	rs13054099;rs5751069;rs13054099:rs13054099;rs5751069:rs5751069	109
ENSG00000269104	AL035681.1	22	41685388	41685686	-1	protein_coding	NA	NA	NA	NA	6	7.486	0	NA	NA	NA	NA	Yes	Promoter_anchored_loops:IMR90:Mesenchymal_Stem_Cell	1.944e-09	rs13054099;rs13054099:rs13054099;rs5751069:rs5751069	109
ENSG00000100403	ZC3H7B	22	41697526	41756151	1	protein_coding	23264	ZC3H7B	0.990762	-0.628158	40	10.4	363	8.55416e-13	2.20669e-11	eQTLcatalogue/Quach_2016_ge_monocyte_Pam3CSK4:PsychENCODE_eQTLs:CMC_SVA_cis:GTEx/v8/Adrenal_Gland:GTEx/v8/Brain_Cerebellum:GTEx/v8/Brain_Cortex:GTEx/v8/Brain_Frontal_Cortex_BA9:GTEx/v8/Esophagus_Mucosa:GTEx/v8/Muscle_Skeletal:GTEx/v8/Nerve_Tibial:GTEx/v8/Testis:GTEx/v8/Thyroid:GTEx/v7/Brain_Cerebellum:GTEx/v7/Cells_Transformed_fibroblasts:GTEx/v7/Thyroid:GTEx/v6/Thyroid	NA	Yes	Promoter_anchored_loops:Adult_Cortex:IMR90:Mesenchymal_Stem_Cell	8.159e-10	rs13054099;rs5751069;rs13054099:rs13054099;rs5751069:rs5751069	109
ENSG00000167074	TEF	22	41763337	41795330	1	protein_coding	7008	TEF	0.421036	0.114829	62	15.85	445	3.27170000000001e-310	0	EyeGEx:eQTLcatalogue/BLUEPRINT_ge_monocyte:eQTLcatalogue/BLUEPRINT_ge_T-cell:eQTLcatalogue/CEDAR_B-cell_CD19:eQTLcatalogue/CEDAR_T-cell_CD4:eQTLcatalogue/CEDAR_T-cell_CD8:eQTLcatalogue/Fairfax_2012_B-cell_CD19:eQTLcatalogue/Fairfax_2014_IFN24:eQTLcatalogue/Fairfax_2014_LPS24:eQTLcatalogue/Fairfax_2014_naive:eQTLcatalogue/GENCORD_ge_LCL:eQTLcatalogue/GENCORD_ge_T-cell:eQTLcatalogue/GEUVADIS_ge_LCL…	NA	Yes	Promoter_anchored_loops:Adult_Cortex:IMR90:Mesenchymal_Stem_Cell	8.159e-10	rs13054099;rs5751069;rs5751069:rs13054099	109
ENSG00000183864	TOB2	22	41829496	41843027	-1	protein_coding	10766	TOB2	0.70319	-1.01474	45	12.34	332	1.0857e-30	0	eQTLGen_cis_eQTLs:BIOSQTL/BIOS_eQTL_geneLevel:CMC_SVA_cis:GTEx/v8/Muscle_Skeletal:GTEx/v8/Nerve_Tibial:GTEx/v8/Pancreas:GTEx/v8/Cells_Cultured_fibroblasts:GTEx/v7/Muscle_Skeletal	NA	Yes	Promoter_anchored_loops:EP_correlation_cell_type_oneway:Adult_Cortex:Fetal_Cortex:Aorta:Hippocampus:Left_Ventricle:Liver:Lung:Pancreas:Right_Ventricle:GM12878:IMR90:Mesenchymal_Stem_Cell:Mesendoderm:Neural_Progenitor_Cell:Trophoblast-like_Cell:hESC	8.159e-10	rs13054099;rs5751069;rs13054099:rs5751069:rs13054099	109
ENSG00000100410	PHF5A	22	41855721	41864729	-1	protein_coding	84844	PHF5A	0.849501	-0.474224	29	8.041	386	1.9554e-27	0	EyeGEx:eQTLcatalogue/Fairfax_2014_IFN24:eQTLcatalogue/Kasela_2017_T-cell_CD4:eQTLcatalogue/Kasela_2017_T-cell_CD8:eQTLGen_cis_eQTLs:GTEx/v8/Small_Intestine_Terminal_Ileum:GTEx/v7/Artery_Tibial:GTEx/v7/Esophagus_Muscularis	NA	Yes	Adult_Cortex:Fetal_Cortex:Aorta:Hippocampus:Left_Ventricle:Liver:Lung:Pancreas:Right_Ventricle:GM12878:IMR90:Mesenchymal_Stem_Cell:Mesendoderm:Neural_Progenitor_Cell:Trophoblast-like_Cell:hESC	8.159e-10	rs13054099;rs5751069;rs13054099:rs13054099;rs5751069:rs5751069	109
ENSG00000100412	ACO2	22	41865129	41924993	1	protein_coding	50	ACO2	0.454378	-0.617412	52	8.041	368	8.17257e-17	0	Nom_InsPIRE_Islets_Gene_eQTLs_Nominal_Pvalues:EyeGEx:eQTLcatalogue/Quach_2016_ge_monocyte_Pam3CSK4:PsychENCODE_eQTLs:eQTLGen_cis_eQTLs:BIOSQTL/BIOS_eQTL_geneLevel:GTEx/v8/Adipose_Subcutaneous:GTEx/v8/Adipose_Visceral_Omentum:GTEx/v8/Artery_Aorta:GTEx/v8/Artery_Tibial:GTEx/v8/Brain_Cerebellum:GTEx/v8/Brain_Nucleus_accumbens_basal_ganglia:GTEx/v8/Breast_Mammary_Tissue:GTEx/v8/Colon_Sigmoid:GTEx/v8/…	NA	Yes	Adult_Cortex:Fetal_Cortex:Aorta:Hippocampus:Left_Ventricle:Liver:Lung:Pancreas:Right_Ventricle:GM12878:IMR90:Mesenchymal_Stem_Cell:Mesendoderm:Neural_Progenitor_Cell:Trophoblast-like_Cell:hESC	8.159e-10	rs5751069;rs13054099;rs13054099:rs13054099;rs5751069:rs5751069	109
ENSG00000100413	POLR3H	22	41921808	41940610	-1	protein_coding	171568	POLR3H	0.00200711	-1.30585	42	10.29	446	1.72393e-64	0	EyeGEx:eQTLcatalogue/Fairfax_2012_B-cell_CD19:eQTLcatalogue/Fairfax_2014_LPS2:eQTLcatalogue/GENCORD_ge_fibroblast:eQTLcatalogue/GENCORD_ge_LCL:eQTLcatalogue/GEUVADIS_ge_LCL:eQTLcatalogue/HipSci_ge_iPSC:eQTLcatalogue/Quach_2016_ge_monocyte_Pam3CSK4:eQTLcatalogue/TwinsUK_ge_LCL:PsychENCODE_eQTLs:eQTLGen_cis_eQTLs:BIOSQTL/BIOS_eQTL_geneLevel:xQTLServer_eQTLs:CMC_SVA_cis:CMC_NoSVA_cis:BRAINEAC/FCTX:B…	NA	Yes	Promoter_anchored_loops:Adult_Cortex:Fetal_Cortex:Left_Ventricle:Liver:GM12878:IMR90:Mesenchymal_Stem_Cell:Mesendoderm:Trophoblast-like_Cell:hESC	8.159e-10	rs13054099;rs5751069;rs13054099:rs13054099;rs5751069:rs5751069	109
ENSG00000172346	CSDC2	22	41956767	41973745	1	protein_coding	27254	CSDC2	0.0798035	0.319356	25	9.224	395	0	0	eQTLcatalogue/BrainSeq_ge_brain:eQTLcatalogue/HipSci_ge_iPSC:PsychENCODE_eQTLs:eQTLGen_cis_eQTLs:BIOSQTL/BIOS_eQTL_geneLevel:xQTLServer_eQTLs:CMC_SVA_cis:CMC_NoSVA_cis:BRAINEAC/PUTM:GTEx/v8/Adipose_Subcutaneous:GTEx/v8/Whole_Blood:GTEx/v8/Artery_Aorta:GTEx/v8/Artery_Tibial:GTEx/v8/Brain_Amygdala:GTEx/v8/Brain_Anterior_cingulate_cortex_BA24:GTEx/v8/Brain_Caudate_basal_ganglia:GTEx/v8/Brain_Cortex:…	NA	Yes	Adult_Cortex:Fetal_Cortex:Left_Ventricle:Liver:GM12878:IMR90:Mesenchymal_Stem_Cell:Mesendoderm:Trophoblast-like_Cell:hESC	8.159e-10	rs13054099;rs5751069;rs13054099:rs5751069:rs13054099	109
ENSG00000100417	PMM1	22	41972898	41985894	-1	protein_coding	5372	PMM1	0.000159925	NA	5	16.44	409	2.6502e-188	0	TIGER/Nom_Alonso_Pancreatic_islets:Nom_InsPIRE_Islets_Gene_eQTLs_Nominal_Pvalues:eQTLcatalogue/BLUEPRINT_ge_monocyte:eQTLcatalogue/CEDAR_ileum:eQTLcatalogue/CEDAR_monocyte_CD14:eQTLcatalogue/CEDAR_T-cell_CD4:eQTLcatalogue/Fairfax_2012_B-cell_CD19:eQTLcatalogue/Fairfax_2014_IFN24:eQTLcatalogue/Fairfax_2014_LPS24:eQTLcatalogue/Fairfax_2014_LPS2:eQTLcatalogue/Fairfax_2014_naive:eQTLcatalogue/GENCORD…	NA	Yes	Promoter_anchored_loops:Adult_Cortex	8.159e-10	rs13054099;rs5751069;rs13054099:rs5751069	109
ENSG00000100418	DESI1	22	41994032	42017100	-1	protein_coding	27351	DESI1	0.0937225	-0.0430032	7	16.44	412	4.3471e-69	0	TIGER/Nom_Alonso_Pancreatic_islets:EyeGEx:eQTLcatalogue/BLUEPRINT_ge_monocyte:eQTLcatalogue/BLUEPRINT_ge_neutrophil:eQTLcatalogue/CEDAR_neutrophil_CD15:eQTLcatalogue/Lepik_2017_ge_blood:eQTLcatalogue/TwinsUK_ge_blood:eQTLcatalogue/TwinsUK_ge_fat:PsychENCODE_eQTLs:DICE/B_cell_naive:DICE/T_CD4_naive:DICE/T_CD8_naive:DICE/Monocyte_classical:DICE/Monocyte_non_classical:DICE/NK:DICE/T_CD4_TFH:DICE/T_C…	NA	Yes	Promoter_anchored_loops:Adult_Cortex:Fetal_Cortex:Left_Ventricle:Liver:GM12878:IMR90:Mesenchymal_Stem_Cell:Mesendoderm:Trophoblast-like_Cell:hESC	8.159e-10	rs13054099;rs5751069;rs5751069:rs13054099:rs13054099	109
ENSG00000196419	XRCC6	22	42017123	42060044	1	protein_coding	2547	XRCC6	0.996856	-0.128101	8	11.67	297	3.53036e-09	3.53675e-09	eQTLGen_cis_eQTLs:BIOSQTL/BIOS_eQTL_geneLevel:GTEx/v8/Whole_Blood:GTEx/v8/Artery_Tibial:GTEx/v8/Brain_Cerebellar_Hemisphere:GTEx/v8/Lung:GTEx/v8/Muscle_Skeletal:GTEx/v8/Nerve_Tibial:GTEx/v7/Whole_Blood:GTEx/v7/Brain_Caudate_basal_ganglia:GTEx/v7/Nerve_Tibial	NA	Yes	Promoter_anchored_loops:Adult_Cortex:Fetal_Cortex:Left_Ventricle:Liver:GM12878:IMR90:Mesenchymal_Stem_Cell:Mesendoderm:Trophoblast-like_Cell:hESC	1.523e-09	rs13054099;rs5751069;rs5751069:rs13054099:rs13054099	109
ENSG00000100138	NHP2L1	22	42069934	42086508	-1	protein_coding	4809	NHP2L1	0.710585	0.0822262	14	10.97	411	2.6405e-168	0	eQTLcatalogue/CEDAR_B-cell_CD19:eQTLcatalogue/CEDAR_T-cell_CD4:eQTLcatalogue/CEDAR_T-cell_CD8:eQTLcatalogue/Fairfax_2012_B-cell_CD19:eQTLcatalogue/Fairfax_2014_IFN24:eQTLcatalogue/Fairfax_2014_LPS24:eQTLcatalogue/Fairfax_2014_LPS2:eQTLcatalogue/Kasela_2017_T-cell_CD4:eQTLcatalogue/Quach_2016_ge_monocyte_LPS:eQTLcatalogue/Quach_2016_ge_monocyte_Pam3CSK4:PsychENCODE_eQTLs:eQTLGen_cis_eQTLs:CMC_SVA_…	NA	Yes	Adult_Cortex:Fetal_Cortex:Aorta:Left_Ventricle:Liver:GM12878:IMR90:Mesenchymal_Stem_Cell:Mesendoderm:Trophoblast-like_Cell:hESC	8.159e-10	rs13054099;rs5751069;rs13054099:rs5751069:rs13054099	109
ENSG00000184208	C22orf46	22	42084943	42094140	1	protein_coding	101927302	C22orf46	NA	-0.442689	12	10.97	107	3.66184e-07	0.00183092	eQTLcatalogue/CEDAR_T-cell_CD8:eQTLcatalogue/TwinsUK_ge_fat:PsychENCODE_eQTLs	NA	Yes	Adult_Cortex:Fetal_Cortex:Aorta:Left_Ventricle:Liver:GM12878:IMR90:Mesenchymal_Stem_Cell:Mesendoderm:Trophoblast-like_Cell:hESC	1.762e-09	rs13054099;rs5751069;rs13054099:rs5751069:rs13054099	109
ENSG00000167077	MEI1	22	42095503	42195460	1	protein_coding	150365	MEI1	1.21592e-08	0.500155	49	13.35	440	3.27170000000001e-310	0	TIGER/Nom_Alonso_Pancreatic_islets:Nom_InsPIRE_Islets_Gene_eQTLs_Nominal_Pvalues:EyeGEx:eQTLcatalogue/Alasoo_2018_ge_macrophage_IFNg:eQTLcatalogue/Alasoo_2018_ge_macrophage_naive:eQTLcatalogue/BLUEPRINT_ge_monocyte:eQTLcatalogue/BLUEPRINT_ge_neutrophil:eQTLcatalogue/BLUEPRINT_ge_T-cell:eQTLcatalogue/Fairfax_2012_B-cell_CD19:eQTLcatalogue/Fairfax_2014_IFN24:eQTLcatalogue/Fairfax_2014_LPS24:eQTLcat…	NA	Yes	Promoter_anchored_loops:Adult_Cortex:Fetal_Cortex:Aorta:Left_Ventricle:Liver:GM12878:IMR90:Mesenchymal_Stem_Cell:Mesendoderm:Trophoblast-like_Cell:hESC	8.159e-10	rs13054099;rs5751069;rs13054099:rs5751069	109
ENSG00000100147	CCDC134	22	42196683	42222303	1	protein_coding	79879	CCDC134	0.000741173	0.32496	17	13.35	410	1.6866e-175	0	TIGER/Nom_Alonso_Pancreatic_islets:eQTLcatalogue/Alasoo_2018_ge_macrophage_IFNg_Salmonella:eQTLcatalogue/Alasoo_2018_ge_macrophage_IFNg:eQTLcatalogue/Alasoo_2018_ge_macrophage_Salmonella:eQTLcatalogue/BLUEPRINT_ge_monocyte:eQTLcatalogue/BLUEPRINT_ge_neutrophil:eQTLcatalogue/BLUEPRINT_ge_T-cell:eQTLcatalogue/Fairfax_2014_IFN24:eQTLcatalogue/Fairfax_2014_LPS24:eQTLcatalogue/Fairfax_2014_LPS2:eQTLca…	NA	Yes	Adult_Cortex:Fetal_Cortex:Aorta:Left_Ventricle:Liver:Right_Ventricle:Spleen:GM12878:IMR90:Mesenchymal_Stem_Cell:Mesendoderm:Trophoblast-like_Cell:hESC	8.159e-10	rs13054099;rs5751069	109
ENSG00000198911	SREBF2	22	42229109	42303312	1	protein_coding	6721	SREBF2	0.996272	0.410467	0	0	97	4.09744e-08	3.84085e-05	BIOSQTL/BIOS_eQTL_geneLevel:GTEx/v8/Nerve_Tibial:GTEx/v8/Skin_Sun_Exposed_Lower_leg:GTEx/v8/Testis	NA	Yes	EP_correlation_cell_type_oneway:Adult_Cortex:Fetal_Cortex:GM12878:IMR90:Mesenchymal_Stem_Cell:Mesendoderm:hESC	1.177e-09	rs13054099;rs5751069	109
ENSG00000234965	SHISA8	22	42307297	42310570	-1	protein_coding	440829	SHISA8	NA	NA	0	0	1	2.71393e-05	1.99642e-12	GTEx/v8/Heart_Atrial_Appendage	NA	Yes	Left_Ventricle:Liver:GM12878:IMR90:Mesenchymal_Stem_Cell:Mesendoderm:Trophoblast-like_Cell:hESC	0.001298	rs5751069;rs13054099	109
ENSG00000159958	TNFRSF13C	22	42321045	42322822	-1	protein_coding	115650	TNFRSF13C	0.641055	-0.0639812	0	0	325	1.05203e-10	1.83603e-17	EyeGEx:eQTLGen_cis_eQTLs:GTEx/v8/Brain_Cerebellar_Hemisphere:GTEx/v8/Brain_Cerebellum:GTEx/v8/Brain_Frontal_Cortex_BA9:GTEx/v8/Esophagus_Mucosa:GTEx/v8/Heart_Atrial_Appendage:GTEx/v8/Muscle_Skeletal:GTEx/v8/Nerve_Tibial:GTEx/v8/Skin_Not_Sun_Exposed_Suprapubic:GTEx/v8/Skin_Sun_Exposed_Lower_leg:GTEx/v7/Brain_Cerebellar_Hemisphere:GTEx/v7/Heart_Atrial_Appendage:GTEx/v7/Skin_Sun_Exposed_Lower_leg	NA	Yes	Promoter_anchored_loops:IMR90:Mesenchymal_Stem_Cell	1.337e-09	rs13054099;rs5751069	109
ENSG00000100162	CENPM	22	42334725	42343168	-1	protein_coding	79019	CENPM	0.213984	0.020299	0	0	335	4.39625e-12	0	eQTLcatalogue/BrainSeq_ge_brain:PsychENCODE_eQTLs:eQTLGen_cis_eQTLs:GTEx/v8/Adipose_Subcutaneous:GTEx/v8/Brain_Cerebellar_Hemisphere:GTEx/v8/Brain_Cerebellum:GTEx/v8/Brain_Nucleus_accumbens_basal_ganglia:GTEx/v8/Breast_Mammary_Tissue:GTEx/v8/Colon_Sigmoid:GTEx/v8/Muscle_Skeletal:GTEx/v8/Nerve_Tibial:GTEx/v8/Ovary:GTEx/v8/Cells_Cultured_fibroblasts:GTEx/v8/Skin_Sun_Exposed_Lower_leg:GTEx/v8/Testis…	NA	Yes	Adult_Cortex:Fetal_Cortex:IMR90:Mesenchymal_Stem_Cell	1.177e-09	rs13054099;rs5751069;rs13054099:rs5751069	109
ENSG00000100167	2024-09-03	22	42372276	42394225	1	protein_coding	55964	2024-09-03	0.0692482	-0.598387	0	0	14	4.66433e-05	0.00115682	GTEx/v8/Nerve_Tibial:GTEx/v7/Nerve_Tibial	NA	Yes	Mesenchymal_Stem_Cell	1.014e-07	rs13054099;rs5751069	109
ENSG00000183066	WBP2NL	22	42394729	42454460	1	protein_coding	164684	WBP2NL	2.07233e-09	0.730693	0	0	32	2.48007e-07	4.19862e-40	PsychENCODE_eQTLs:BIOSQTL/BIOS_eQTL_geneLevel:GTEx/v8/Muscle_Skeletal:GTEx/v8/Nerve_Tibial:GTEx/v8/Pituitary:GTEx/v8/Cells_Cultured_fibroblasts:GTEx/v7/Cells_Transformed_fibroblasts:GTEx/v6/Brain_Frontal_Cortex_BA9	NA	Yes	Mesenchymal_Stem_Cell	1.177e-09	rs5751069;rs13054099	109
ENSG00000198951	NAGA	22	42454358	42466846	-1	protein_coding	4668	NAGA	2.0199e-06	0.183467	0	0	281	3.3961e-55	0	TIGER/Nom_Alonso_Pancreatic_islets:EyeGEx:eQTLcatalogue/Fairfax_2014_naive:eQTLGen_cis_eQTLs:BIOSQTL/BIOS_eQTL_geneLevel:GTEx/v8/Artery_Tibial:GTEx/v8/Brain_Cerebellar_Hemisphere:GTEx/v8/Brain_Cerebellum:GTEx/v8/Breast_Mammary_Tissue:GTEx/v8/Esophagus_Muscularis:GTEx/v8/Nerve_Tibial:GTEx/v8/Pancreas:GTEx/v8/Cells_Cultured_fibroblasts:GTEx/v8/Skin_Sun_Exposed_Lower_leg:GTEx/v8/Thyroid:GTEx/v7/Adip…	NA	Yes	Left_Ventricle:Liver:GM12878:IMR90:Mesenchymal_Stem_Cell:Mesendoderm:Trophoblast-like_Cell:hESC	1.177e-09	rs13054099;rs5751069	109
ENSG00000177096	FAM109B	22	42470255	42475445	1	protein_coding	150368	FAM109B	0.000109677	0.439359	0	0	256	8.5398e-33	0	eQTLcatalogue/Quach_2016_ge_monocyte_naive:PsychENCODE_eQTLs:eQTLGen_cis_eQTLs:GTEx/v8/Cells_Cultured_fibroblasts:GTEx/v8/Thyroid:GTEx/v7/Nerve_Tibial	NA	Yes	Adult_Cortex:Left_Ventricle:Liver:GM12878:IMR90:Mesenchymal_Stem_Cell:Mesendoderm:Trophoblast-like_Cell:hESC	5.024e-08	rs13054099;rs5751069	109
ENSG00000183172	SMDT1	22	42475695	42480288	1	protein_coding	91689	SMDT1	0.16335	-0.139727	0	0	271	1.1401e-100	0	EyeGEx:eQTLcatalogue/Lepik_2017_ge_blood:eQTLGen_cis_eQTLs:GTEx/v8/Adipose_Subcutaneous:GTEx/v8/Adipose_Visceral_Omentum:GTEx/v8/Adrenal_Gland:GTEx/v8/Whole_Blood:GTEx/v8/Artery_Aorta:GTEx/v8/Artery_Coronary:GTEx/v8/Artery_Tibial:GTEx/v8/Colon_Transverse:GTEx/v8/Esophagus_Mucosa:GTEx/v8/Esophagus_Muscularis:GTEx/v8/Lung:GTEx/v8/Nerve_Tibial:GTEx/v8/Pancreas:GTEx/v8/Skin_Sun_Exposed_Lower_leg:GTEx…	NA	Yes	Adult_Cortex:Left_Ventricle:Liver:GM12878:IMR90:Mesenchymal_Stem_Cell:Mesendoderm:Trophoblast-like_Cell:hESC	5.024e-08	rs13054099;rs5751069	109
ENSG00000184983	NDUFA6	22	42481529	42486959	-1	protein_coding	4700	NDUFA6	0.00325949	-0.532149	0	0	35	1.6892e-29	0	PsychENCODE_eQTLs:DICE/B_cell_naive:DICE/T_CD4_naive:DICE/T_CD4_naive_activated:DICE/T_CD8_naive:DICE/T_CD8_naive_activated:DICE/Monocyte_classical:DICE/Monocyte_non_classical:DICE/NK:DICE/T_CD4_TFH:DICE/T_CD4_TH1:DICE/T_CD4_TH17:DICE/T_CD4_TH1_17:DICE/T_CD4_TH2:DICE/T_CD4_memory_TREG:DICE/T_CD4_naive_TREG:eQTLGen_cis_eQTLs:GTEx/v8/Adipose_Subcutaneous:GTEx/v8/Artery_Tibial:GTEx/v8/Lung:GTEx/v8/M…	NA	Yes	Left_Ventricle:Liver:GM12878:IMR90:Mesenchymal_Stem_Cell:Mesendoderm:Trophoblast-like_Cell:hESC	1.23e-07	rs13054099;rs5751069	109
ENSG00000100197	CYP2D6	22	42522501	42526908	-1	protein_coding	101929829	CYP2D6	9.22646e-10	0.153954	0	0	64	2.99933e-11	7.89647e-86	EyeGEx:eQTLcatalogue/BrainSeq_ge_brain:eQTLcatalogue/Lepik_2017_ge_blood:eQTLcatalogue/Quach_2016_ge_monocyte_R848:PsychENCODE_eQTLs:eQTLGen_cis_eQTLs:GTEx/v8/Adipose_Subcutaneous:GTEx/v8/Whole_Blood:GTEx/v8/Artery_Aorta:GTEx/v8/Brain_Anterior_cingulate_cortex_BA24:GTEx/v8/Brain_Cerebellum:GTEx/v8/Brain_Cortex:GTEx/v8/Brain_Nucleus_accumbens_basal_ganglia:GTEx/v8/Colon_Sigmoid:GTEx/v8/Colon_Trans…	NA	Yes	IMR90:Mesenchymal_Stem_Cell	1.177e-09	rs5751069;rs13054099	109
ENSG00000100207	TCF20	22	42556019	42739622	-1	protein_coding	6942	TCF20	0.999978	-0.944696	0	0	9	8.4758e-06	0.00686048	TIGER/Nom_Alonso_Pancreatic_islets:eQTLGen_cis_eQTLs	NA	Yes	Aorta:IMR90:Mesenchymal_Stem_Cell:Mesendoderm:Trophoblast-like_Cell:hESC	6.737e-05	rs5751069;rs13054099	109
ENSG00000189306	RRP7A	22	42905974	42915808	-1	protein_coding	27341	RRP7A	0.00237296	3.49513	0	0	70	2.9429e-08	0.000127218	eQTLGen_cis_eQTLs	NA	Yes	IMR90:Mesenchymal_Stem_Cell	0.001298	rs13054099;rs5751069	109
ENSG00000182257	C22orf26	22	46445358	46450024	-1	protein_coding	55267	C22orf26	0.035846	-0.0535616	28	14.95	44	1.349e-52	0	eQTLcatalogue/BLUEPRINT_ge_T-cell:eQTLcatalogue/Lepik_2017_ge_blood:eQTLcatalogue/TwinsUK_ge_fat:eQTLGen_cis_eQTLs:BIOSQTL/BIOS_eQTL_geneLevel:GTEx/v8/Adipose_Subcutaneous:GTEx/v8/Artery_Aorta:GTEx/v8/Artery_Tibial:GTEx/v8/Brain_Caudate_basal_ganglia:GTEx/v8/Heart_Atrial_Appendage:GTEx/v8/Lung:GTEx/v8/Muscle_Skeletal:GTEx/v8/Nerve_Tibial:GTEx/v8/Skin_Sun_Exposed_Lower_leg:GTEx/v7/Adipose_Subcutan…	NA	Yes	Adult_Cortex:IMR90	3.577e-09	rs7285579	110
ENSG00000197182	FLJ27365	22	46449749	46509808	1	protein_coding	NA	NA	NA	NA	24	14.95	43	6.8573e-39	0	eQTLcatalogue/Lepik_2017_ge_blood:eQTLcatalogue/TwinsUK_ge_blood:eQTLcatalogue/TwinsUK_ge_LCL:eQTLGen_cis_eQTLs:BIOSQTL/BIOS_eQTL_geneLevel:GTEx/v8/Whole_Blood:GTEx/v7/Whole_Blood	NA	Yes	Adult_Cortex:IMR90	3.577e-09	rs7285579	110
ENSG00000175556	LONRF3	23	118108581	118152318	1	protein_coding	79836	LONRF3	0.153378	NA	0	0	4	1.7696e-35	0	eQTLGen_trans_eQTLs	NA	No	NA	1.527e-07	rs13054099;rs5751069	109

## Sheet: S8
S8.Gene-based association analysis using mBAT-combo, with an inclusion criterion of FDR<0.05.
Gene	Chr	Start	End	No.SNPs	SNP_start	SNP_end	TopSNP	TopSNP_Pvalue	No.Eigenvalues	Chisq_mBAT	P_mBATcombo	FDR
RERE	1	8412457	8908980	702	rs11121153	rs534627500	rs301806	5.43309e-09	36	56.946	0.000493037	0.0326302
GMEB1	1	28995290	29045865	120	rs61786032	rs116767588	rs61787572	2.76563e-06	18	36.8121	0.000488132	0.0326302
YTHDF2	1	29063133	29096287	137	rs6703309	rs678849	rs61787572	2.76563e-06	17	35.3602	0.000264943	0.0221093
GRIK3	1	37261128	37500116	613	rs10908315	rs72653565	rs10908315	1.97318e-09	53	88.4334	0.00052682	0.0341765
PDZK1IP1	1	47649254	47656716	207	rs111803973	rs146685694	rs7534271	9.64261e-08	19	49.5398	7.17005e-05	0.00911029
TAL1	1	47681962	47697897	204	rs2798357	rs3122619	rs7534271	9.64261e-08	22	47.8749	0.000200141	0.0179365
STIL	1	47715811	47780564	311	rs17103014	rs12129259	rs7534271	9.64261e-08	17	37.2198	0.000123484	0.0127128
AGBL4	1	48998526	50489626	1915	rs34067754	rs79540870	rs1534390	7.08946e-08	54	101.441	0.000177228	0.0165381
ELAVL4	1	50489701	50669444	234	rs78866251	rs3001646	rs11579246	1.0514e-08	28	55.8086	7.64868e-05	0.00946987
DMRTA2	1	50883222	50889115	149	rs115876239	rs17106225	rs78885842	3.06125e-06	14	43.2995	0.000148649	0.0142259
FAF1	1	50902700	51425939	733	rs2055492	rs3813634	rs78012880	2.7014e-06	21	39.8667	0.000650128	0.0386062
OSBPL9	1	52042851	52264099	470	rs115953109	rs34652944	rs12135327	4.87769e-12	27	61.9724	2.29384e-05	0.00404431
NRDC	1	52254863	52344477	244	rs11810827	rs76325561	rs12135327	4.87769e-12	22	41.6493	6.50702e-05	0.00844264
RAB3B	1	52373628	52456372	262	rs71653015	rs2992178	rs35728568	2.03417e-06	19	42.873	0.000109144	0.0115504
TXNDC12	1	52485803	52520863	168	rs2783197	rs4926564	rs2491868	0.000195984	14	37.7733	0.000917464	0.0482303
ENSG00000285839	1	52485825	52499022	154	rs2783197	rs17107036	rs2491868	0.000195984	12	37.2072	0.00038728	0.0285457
SGIP1	1	66998950	67216822	805	rs373027577	rs549148	rs672230	9.14996e-07	25	47.8588	5.77548e-05	0.00782487
DYNLT5	1	67218142	67244730	256	rs12117649	rs1498349	rs672230	9.14996e-07	22	41.7689	3.73678e-05	0.00586071
NEGR1	1	71861626	72748222	1437	rs61777331	rs9424994	rs3101336	2.0989e-21	52	110.674	2.05042e-10	7.76822e-07
ELAPOR1	1	109656301	109749403	476	rs28663119	rs648771	rs607067	0.000858121	32	66.5923	0.000634186	0.0378971
PPIAL4H	1	148201752	148202511	17	rs150047354	rs186214068	rs146854910	0.000135748	10	34.8956	0.000251747	0.0212
PSMB4	1	151372036	151374413	130	rs1621016	rs28681298	rs4246527	5.80601e-06	17	35.9334	0.00081571	0.0449353
POGZ	1	151375200	151431970	183	rs7531495	rs79876052	rs6587584	8.0838e-07	25	55.0508	0.000300353	0.0241881
CGN	1	151482986	151511168	150	rs7542776	rs7528601	rs6587584	8.0838e-07	24	57.0597	0.000206329	0.018264
PRDX6	1	173446469	173457954	147	rs10737301	rs12043475	rs76401394	1.86893e-05	12	40.6627	8.61999e-05	0.0102055
SLC9C2	1	173469599	173572211	219	rs34296122	rs7515352	rs76315652	1.5129e-06	18	53.7561	3.86681e-05	0.0059552
ENSG00000285777	1	173565199	173638976	166	rs61828884	rs6413827	rs79277368	5.03698e-08	18	45.4273	0.000407593	0.0296963
ANKRD45	1	173577475	173638990	151	rs116246327	rs6413827	rs79277368	5.03698e-08	17	40.1573	0.000627127	0.0378971
TEX50	1	173604477	173606269	78	rs10798290	rs34906768	rs74448174	7.33109e-07	14	39.7299	0.000320215	0.0250654
KLHL20	1	173684080	173755830	170	rs57592568	rs116411627	rs75088350	1.19807e-08	16	44.2405	0.000187368	0.0172297
CENPL	1	173768688	173794021	119	rs114025333	rs111468499	rs16846478	1.02631e-09	14	50.7639	2.11852e-06	0.000729657
DARS2	1	173793791	173827946	166	rs7546048	rs61827936	rs16846478	1.02631e-09	12	44.7387	4.35224e-07	0.000222823
ZBTB37	1	173837220	173872685	190	rs61827876	rs147466565	rs16846478	1.02631e-09	10	44.0417	9.1181e-07	0.000411248
SERPINC1	1	173872938	173886465	180	rs16846439	rs12069129	rs16846478	1.02631e-09	9	41.2158	3.83864e-06	0.00103879
RC3H1	1	173900222	173991495	288	rs61609614	rs16846667	rs16846526	3.75279e-09	13	44.9063	2.67695e-05	0.00460995
GPR52	1	174417102	174418683	200	rs16846938	rs58063264	rs116087778	7.26701e-06	11	40.5289	5.78304e-05	0.00782487
COP1	1	175913967	176176422	811	rs980042	rs352327	rs10913112	5.43309e-09	16	16.444	0.000142306	0.0139674
BRINP2	1	177140094	177251558	410	rs11583666	rs4453002	rs56172555	4.45085e-11	20	40.4613	0.000289717	0.0236556
CACNA1E	1	181286826	181777219	1384	rs116818303	rs149640240	rs199929	1.68806e-07	61	88.4935	0.000303157	0.0241881
CRB1	1	197237334	197447585	361	rs35078088	rs146078101	rs10922236	3.52301e-13	33	53.4822	3.47328e-07	0.000193513
DENND1B	1	197473878	197744826	485	rs115212087	rs6667560	rs12117045	2.21681e-15	19	52.7571	9.15326e-08	7.23952e-05
C1orf53	1	197871760	197876497	173	rs10922305	rs116259466	rs12145078	2.12454e-14	18	37.9952	2.48879e-07	0.000152081
LHX9	1	197881032	197904608	193	rs149184034	rs115912529	rs10801632	1.3929e-10	26	36.9737	0.000107589	0.0114498
RAB29	1	205737114	205744610	229	rs823092	rs6670895	rs11557080	0.000987312	17	44.9135	0.0004781	0.0325091
MRPL33	2	27994584	28210954	344	rs1881394	rs56183353	rs11127128	6.79535e-06	24	41.6793	0.000478807	0.0325091
RBKS	2	28004246	28113548	220	rs143421598	rs4390729	rs11127128	6.79535e-06	23	39.7218	0.000525208	0.0341765
NRXN1	2	50145641	51452713	3448	rs6726106	rs117777129	rs13031157	3.70868e-07	74	93.5047	8.10985e-06	0.00170694
VRK2	2	58134764	58387055	661	rs4672225	rs6709533	rs2678911	1.97318e-09	20	49.5869	0.000210677	0.0184762
WDPCP	2	63346694	64054977	1120	rs35443214	rs4538187	rs10206458	2.27556e-06	32	34.0631	0.000539446	0.0343223
COX5B	2	98262525	98264846	106	rs13414496	rs145692036	rs11886025	0.00129362	15	40.553	0.00074387	0.042189
ACTR1B	2	98272402	98280507	120	rs374795579	rs2276645	rs11680855	0.00115405	14	42.8556	0.000180403	0.0166701
CNTNAP5	2	124782864	125678796	2297	rs17010681	rs143398443	rs56201719	2.35952e-08	66	78.6465	3.15921e-05	0.00521568
BAZ2B	2	160175490	160473080	1013	rs13419513	rs4665102	rs7586034	2.70591e-07	32	58.9513	0.000117996	0.0124068
CD302	2	160625139	160654766	438	rs17813538	rs200836093	rs7566887	1.68806e-07	12	34.0503	0.000837881	0.0457406
LY75	2	160659866	160761267	514	rs138712773	rs949753	rs7566887	1.68806e-07	20	40.9759	0.000878894	0.047164
RBMS1	2	161128662	161350318	672	rs12465777	rs578258171	rs80170940	7.80048e-06	28	43.387	0.000851872	0.0462379
TANK	2	161993419	162092741	275	rs16845614	rs1146027	rs1267067	3.79791e-08	21	48.5704	0.000678222	0.039653
SP9	2	175199682	175203228	157	rs11695042	rs111243462	rs6715304	1.3929e-10	22	36.6522	9.02001e-06	0.00185724
CIR1	2	175212750	175260440	295	rs143820354	rs12993286	rs6715304	1.3929e-10	19	33.7353	6.33438e-06	0.00141639
SCRN3	2	175260458	175294303	255	rs74399396	rs13407011	rs6715304	1.3929e-10	15	33.4927	0.000252927	0.0212
GPR155	2	175296299	175351822	278	rs12471149	rs10930678	rs13009079	2.38306e-07	24	42.9558	0.000494371	0.0326302
KLF7	2	207938861	208031991	406	rs72954225	rs2216375	rs7586277	8.032e-11	28	71.2009	2.32313e-05	0.00404431
TOPAZ1	3	44283378	44373590	266	rs1565208	rs114147259	rs4615049	1.52099e-07	14	42.8881	3.00147e-05	0.0050765
TCAIM	3	44379611	44450943	211	rs7626710	rs35126902	rs11707582	3.70868e-07	18	39.1171	4.64446e-06	0.00118892
ZNF445	3	44473197	44519162	148	rs6801706	rs13072696	rs1129133	8.80303e-07	18	60.0056	3.00046e-06	0.000848324
ZNF852	3	44536339	44552128	145	rs78585428	rs9810216	rs6441850	2.35952e-08	15	48.6469	1.37962e-05	0.00256217
ZKSCAN7	3	44596685	44635665	207	rs6789709	rs1608006	rs9682646	3.28532e-09	12	51.8011	4.09001e-07	0.000221363
ZNF660	3	44619715	44641186	188	rs9809306	rs1868603	rs9682646	3.28532e-09	12	54.9452	4.30788e-08	4.04967e-05
ZNF197	3	44626380	44689963	218	rs13100967	rs149176420	rs11709024	1.97318e-09	14	75.7027	3.49011e-10	1.02944e-06
ZNF35	3	44690224	44702283	110	rs148848829	rs6779503	rs11709024	1.97318e-09	12	69.5958	7.57977e-10	1.43584e-06
ZNF502	3	44754135	44765323	127	rs75692653	rs74778405	rs11709024	1.97318e-09	18	61.3579	2.46188e-07	0.000152081
ZNF501	3	44771088	44778575	126	rs11712337	rs9823416	rs11709024	1.97318e-09	18	48.2953	1.93714e-07	0.000135908
KIAA1143	3	44779153	44803111	133	rs116336435	rs147761275	rs13058822	1.97318e-09	19	52.3545	9.43185e-07	0.000415506
KIF15	3	44803213	44914868	284	rs143767189	rs72863173	rs10429	3.28532e-09	23	45.3292	2.02388e-06	0.00070997
TMEM42	3	44903396	44907162	176	rs76971569	rs150933983	rs10429	3.28532e-09	16	30.381	5.00357e-06	0.00124492
TGM4	3	44916100	44956482	211	rs116236231	rs60122785	rs10429	3.28532e-09	20	38.549	8.29041e-07	0.000391184
CCDC51	3	48473574	48481866	130	rs7635522	rs9851771	rs12491849	1.00235e-05	11	13.7916	0.000755735	0.042734
TMA7	3	48481667	48485616	121	rs6803460	rs142063845	rs12491849	1.00235e-05	12	14.8733	0.000665685	0.0390516
ATRIP	3	48488114	48509044	139	rs13071337	rs6762888	rs12491849	1.00235e-05	14	25.3166	0.000830228	0.0454538
CELSR3	3	48673896	48700319	117	rs2255532	rs9882549	rs116781404	6.81135e-07	16	43.1147	0.000459197	0.0319359
NCKIPSD	3	48711277	48723797	115	rs13063312	rs116624293	rs116781404	6.81135e-07	15	42.7276	0.000302923	0.0241881
IP6K2	3	48725436	48777786	119	rs114899327	rs116684805	rs116781404	6.81135e-07	18	45.7913	0.000570376	0.0357558
PRKAR2A	3	48782030	48885307	100	rs11557629	rs75218974	rs149178804	3.79791e-08	19	69.3182	2.3802e-07	0.000152081
SLC25A20	3	48894359	48936337	68	rs144070260	rs80245267	rs7432782	2.59658e-08	17	60.6835	1.5532e-06	0.000600454
ARIH2	3	48956254	49023815	83	rs13073997	rs116185530	rs7432782	2.59658e-08	19	69.3164	2.38495e-07	0.000152081
P4HTM	3	49027322	49044586	55	rs144790640	rs112014511	rs79875185	3.44362e-08	17	70.458	3.59168e-08	3.74674e-05
QRICH1	3	49067140	49131796	76	rs111820006	rs111393388	rs148923907	8.4804e-09	21	66.7787	1.18343e-06	0.000498171
QARS1	3	49133365	49142563	54	rs73082357	rs77813979	rs148923907	8.4804e-09	16	66.3211	4.95876e-08	4.26972e-05
USP19	3	49145479	49158371	57	rs375813858	rs9814987	rs138653738	2.42149e-09	16	71.5882	8.99522e-09	1.41997e-05
LAMB2	3	49158547	49170551	72	rs141767461	rs137920315	rs7617480	1.53347e-12	17	63.8617	1.57709e-10	7.4687e-07
CCDC71	3	49199968	49203764	67	rs185050272	rs112890859	rs7617480	1.53347e-12	17	51.9968	4.84241e-10	1.14662e-06
KLHDC8B	3	49209031	49213919	67	rs116836607	rs149407215	rs7617480	1.53347e-12	16	53.4044	3.80407e-10	1.02944e-06
C3orf84	3	49215067	49229291	81	rs33942096	rs73084153	rs7617480	1.53347e-12	15	37.9577	7.41909e-10	1.43584e-06
IHO1	3	49235861	49295539	131	rs62262525	rs9844757	rs7617480	1.53347e-12	15	32.0544	1.16629e-08	1.54306e-05
RHOA	3	49396572	49450431	126	rs11709788	rs1106620	rs9654010	7.5626e-10	14	52.6763	4.18661e-06	0.00110149
TCTA	3	49449645	49453909	84	rs114338085	rs73073015	rs9654010	7.5626e-10	13	59.4634	4.48942e-08	4.04967e-05
ENSG00000283189	3	49454210	49466747	93	rs67485053	rs7355800	rs9654010	7.5626e-10	14	63.4857	3.75801e-08	3.74674e-05
AMT	3	49454211	49460118	85	rs67485053	rs189191355	rs9654010	7.5626e-10	13	64.6034	1.22187e-08	1.54306e-05
NICN1	3	49459766	49466759	89	rs6769744	rs7355800	rs9654010	7.5626e-10	14	65.8808	1.78807e-08	2.11696e-05
DAG1	3	49506136	49573051	124	rs11922013	rs139928512	rs34890793	1.82963e-10	15	55.8366	4.30088e-07	0.000222823
BSN	3	49591910	49708982	164	rs10212296	rs4768	rs34890793	1.82963e-10	17	27.9294	3.34789e-07	0.000192179
APEH	3	49711447	49721404	75	rs62262673	rs3749237	rs11709734	6.15467e-09	14	45.775	8.45141e-06	0.00175929
MST1	3	49721380	49726934	75	rs62262675	rs11714957	rs11709734	6.15467e-09	13	38.3779	2.42385e-06	0.000752705
RNF123	3	49726971	49758962	93	rs11130212	rs7652179	rs7621797	2.89401e-09	15	36.0147	9.81362e-05	0.0109353
AMIGO3	3	49754262	49757117	67	rs36116071	rs114871711	rs7621797	2.89401e-09	14	37.9289	1.50883e-05	0.00277493
GMPPB	3	49754277	49761406	79	rs36116071	rs76424424	rs7621797	2.89401e-09	15	35.9014	1.01716e-05	0.00201662
IP6K1	3	49761727	49823975	142	rs11130213	rs4519692	rs9851930	9.06836e-10	15	42.0085	8.46674e-07	0.000391184
CDHR4	3	49828165	49837306	103	rs13086130	rs13316065	rs9851930	9.06836e-10	11	33.1294	1.25845e-05	0.00240025
INKA1	3	49840694	49842463	102	rs35249408	rs2352975	rs9851930	9.06836e-10	11	29.0173	3.17307e-05	0.00521568
UBA7	3	49842642	49851386	112	rs35249408	rs11130222	rs9851930	9.06836e-10	12	36.0056	2.62011e-06	0.000772933
TRAIP	3	49866034	49894007	125	rs9829155	rs77567985	rs9851930	9.06836e-10	14	29.5626	1.1949e-05	0.00230969
CAMKV	3	49895421	49907368	104	rs2234385	rs142344547	rs7649428	6.15467e-09	13	31.6095	1.02199e-05	0.00201662
MST1R	3	49924435	49941306	113	rs73079018	rs71326904	rs62260755	5.73303e-07	13	29.1868	5.59162e-05	0.00773154
MON1A	3	49944593	49967606	137	rs35441946	rs34691305	rs62260755	5.73303e-07	12	29.2521	4.57923e-05	0.00672437
RBM6	3	49977440	50137478	258	rs12489386	rs2526400	rs7635601	4.67257e-05	14	33.1917	0.000418732	0.0300456
RBM5	3	50126352	50156454	114	rs9810125	rs2624837	rs3774745	2.89187e-05	15	42.8837	0.000244486	0.0208275
SEMA3F	3	50192478	50226508	128	rs140724462	rs60247651	rs3774745	2.89187e-05	19	31.3401	0.000489755	0.0326302
BAP1	3	52435024	52444024	114	rs34908451	rs35258126	rs648514	0.000134439	13	33.7529	0.000647144	0.0385498
PHF7	3	52444676	52457657	129	rs11706515	rs1011062	rs648514	0.000134439	12	35.0295	0.000581395	0.0359914
PBRM1	3	52579368	52719933	370	rs9846089	rs146892594	rs4687625	8.40711e-06	12	14.1772	0.000252761	0.0212
FOXP1	3	71003844	71633129	1184	rs9874089	rs77558354	rs76176112	8.48637e-05	87	136.43	0.000967026	0.0498816
RSRC1	3	157823644	158263519	1511	rs115996629	rs13318109	rs28820925	1.08544e-10	14	22.3793	0.000761124	0.0427968
MLF1	3	158288952	158325041	381	rs9849688	rs7616819	rs1656374	1.02058e-08	10	27.7986	9.71954e-05	0.0108945
HTT	4	3043090	3245684	722	rs2488816	rs189988058	rs4690073	8.1563e-08	23	34.1545	0.000491352	0.0326302
MSANTD1	4	3246096	3273465	280	rs363117	rs2857859	rs7685686	8.1563e-08	19	30.1565	0.000284503	0.0235342
SLC30A9	4	41992519	42092478	616	rs7685973	rs10222863	rs10016837	2.5277e-06	12	39.8633	0.000148015	0.0142259
SRD5A3	4	56212380	56239267	294	rs116603788	rs41324951	rs13113860	6.33425e-05	21	34.0948	0.00077249	0.0432937
ENSG00000288695	4	56212395	56254535	325	rs116603788	rs17721215	rs7677952	1.46868e-05	22	34.024	0.000538519	0.0343223
TMEM165	4	56262124	56319564	336	rs188248575	rs62305264	rs11133381	1.00235e-05	15	32.3848	0.000658154	0.0389256
NAA11	4	80146848	80247215	282	rs114972728	rs28453250	rs1484145	1.12271e-09	19	42.5439	1.33384e-06	0.000549281
MMRN1	4	90800683	90875780	376	rs2737004	rs10516855	rs755053	3.28532e-09	18	33.7108	0.000138272	0.0137771
SFRP2	4	154701743	154710235	357	rs981843	rs147316129	rs13102996	0.00188022	7	40.7941	1.77343e-06	0.000670174
FNIP2	4	159690178	159829202	256	rs2230221	rs4271967	rs62351219	1.00235e-05	20	30.3515	0.000308883	0.0244819
C4orf45	4	159814286	159959912	461	rs35422904	rs34396718	rs13143603	1.46868e-05	20	53.2154	0.000146291	0.0142259
ADCY2	5	7396251	7830194	1082	rs13176070	rs7704596	rs993885	1.52099e-07	63	96.8701	8.92865e-05	0.0103764
CDH18	5	19471405	20575982	2767	rs6892769	rs116577180	rs7700453	2.93191e-08	72	68.248	0.000736782	0.0420106
KIF2A	5	61601989	61686852	394	rs2112884	rs145628829	rs145470460	1.46868e-05	13	28.5635	0.000969035	0.0498816
DIMT1	5	61643111	61699770	301	rs4700005	rs149540	rs145470460	1.46868e-05	11	37.9156	0.000123092	0.0127128
IPO11	5	61699799	61924409	566	rs959899	rs187822737	rs7707553	3.62888e-06	18	32.8845	0.000822562	0.0451646
LRRC70	5	61874646	61877273	171	rs1374009	rs10072795	rs144891249	5.58112e-06	13	22.5938	0.000442781	0.0310652
TMEM161B	5	87485450	87565293	270	rs10514297	rs114968097	rs3099439	2.59275e-15	16	44.0566	9.0478e-05	0.0104508
MEF2C	5	88012934	88200074	457	rs1501673	rs17561711	rs6882046	6.21549e-11	30	75.6784	5.39746e-06	0.00127805
FAM172A	5	92953431	93447404	705	rs10042892	rs1371285	rs10061069	4.98348e-11	28	49.8165	9.41136e-06	0.00191698
POU5F2	5	93068926	93077306	132	rs115136616	rs17372649	rs10061069	4.98348e-11	15	51.5284	1.53166e-07	0.000116057
STK32A	5	146614526	146767418	724	rs6883766	rs143995154	rs1820272	3.06125e-06	35	38.837	0.000618899	0.0375763
TENM2	5	166406034	167691162	2675	rs12517402	rs17832301	rs986391	3.70868e-07	135	157.15	1.90282e-06	0.000693175
ADTRP	6	11712287	11807279	534	rs2224855	rs9470261	rs10485420	4.57145e-07	30	39.3565	0.000912702	0.0482078
FILIP1	6	76001575	76203516	416	rs240419	rs9447506	rs11755902	5.94912e-09	24	36.9539	0.000849612	0.0462379
SENP6	6	76311225	76427997	430	rs13204866	rs72654757	rs2647417	1.13496e-06	14	36.9992	0.000584635	0.0360741
MYO6	6	76458918	76629254	562	rs9343314	rs75280256	rs9359139	5.73303e-07	22	33.6691	0.000357763	0.0268933
MAP3K7	6	91223292	91296791	452	rs12664489	rs62409078	rs401147	2.38306e-07	20	32.0898	0.0007031	0.0404827
SIM1	6	100832885	100912797	286	rs2658153	rs401864	rs12374612	5.93147e-11	31	58.2145	0.000102378	0.0111809
ASCC3	6	100956070	101329248	948	rs111310503	rs1854483	rs12374612	5.93147e-11	22	32.6898	2.27351e-06	0.000743188
[truncated: 215 more rows]

## Sheet: S9
S9.Genes with POPS scores in the top 10% of the distribution.
[truncated: 2,027 more rows]

[truncated: 6 more sheets: S10, S11, S12, S13, S14, S15]
